# Supplementary material for: Rh-Catalyzed annulations of N-methoxybenzamides with ketenimines: synthesis of 3-aminoisoindolinones and 3-diarylmethyleneisoindolinones with strong aggregation induced emission properties
Source: Royal Society of Chemistry journal article supplement (doi:10.1039/c6cc05456k), 2016-01-01
Supplement: c6cc05456k1.pdf [file c6cc05456k1.pdf]

**Rh-catalyzed annulations of *N*-methoxybenzamides and ketenimines:  
Synthesis of 3-aminoisoindolinones and  
3-diarylmethyleneisoindolinones with strong aggregation induced  
emission properties**

Xiaorong Zhou<sup>‡</sup>, Zhixing Peng<sup>‡</sup>, Hongyang Zhao, Zhiyin Zhang,  
Ping Lu\*, Yanguang Wang\*

Department of Chemistry, Zhejiang University, P. R. China

**Content**

|                                                                                        |     |
|----------------------------------------------------------------------------------------|-----|
| General Considerations.....                                                            | S1  |
| Table S1. Optimization of the [4+1] reaction conditions.....                           | S2  |
| Table S2 Photophysical properties of compounds <b>4a-p</b> and <b>5a-d</b> .....       | S3  |
| Preparation of Cesium 2,2,2-trichloroacetate and Potassium 2,2,2-trichloroacetate..... | S4  |
| General Procedure for the Preparation of <i>N</i> -methoxybenzamides <b>1</b> .....    | S4  |
| General Procedure for the Preparation of Ketenimines <b>2</b> .....                    | S6  |
| Synthetic Procedure and Characterization Data for <b>3</b> .....                       | S10 |
| Synthetic Procedure and Characterization Data for <b>4</b> .....                       | S18 |
| Synthetic Procedure and Characterization Data for <b>5</b> and <b>6</b> .....          | S26 |
| Scheme S1 Mechanistic Experiments and Their Procedures.....                            | S29 |
| Figure S3. UV-vis absorption and fluorescence spectra of <b>4a-5d</b> .....            | S33 |
| Table S3. Data of DFT Studies.....                                                     | S36 |
| Copies of NMR Spectra .....                                                            | S42 |

## General considerations

Unless otherwise mentioned, solvents and reagents were purchased from commercial sources and used as received. THF and toluene were distilled from Na before use. MeCN, CH<sub>2</sub>Cl<sub>2</sub> and DCE was distilled from CaH<sub>2</sub>. Melting points were measured with a micro melting point apparatus. Infrared spectra were obtained with an FTIR spectrometer. NMR spectra were obtained on a Bruker AVANCE DMX500 or 400 spectrometer operating at 500 MHz or 400 MHz for <sup>1</sup>H NMR, 126 MHz or 101 MHz for <sup>13</sup>C NMR. Unless otherwise noted, all the NMR spectra were recorded at room temperature. Chemical shifts were quoted in parts per million (ppm) referenced to the appropriate solvent peak or 0.0 ppm for tetramethylsilane. Chemical shifts (in ppm) were referenced to tetramethylsilane ( $\delta = 0$  ppm) in CDCl<sub>3</sub> and *d*<sub>6</sub>-DMSO as an internal standard. <sup>13</sup>C NMR spectra were obtained by using the same NMR spectrometers and chemical shifts were reported in ppm referenced to the center line of a triplet at 77.0 ppm of CDCl<sub>3</sub> or the center line of a heptet at 39.52 ppm of *d*<sub>6</sub>-DMSO. The following abbreviations are used to describe peak patterns as appropriate: s = singlet, d = doublet, t = triplet, q = quartet, m = multiplet. Coupling constants *J* were reported in hertz unit (Hz). High-resolution mass spectra (HRMS) data were obtained with an electron ionization time-of-flight (EI-TOF) mass spectrometer. Flash column chromatography was performed employing 300-400 mesh silica gel. Thin layer chromatography (TLC) was performed on silica gel HSGF254.

The absorption spectra were measured using UV-vis spectrometer (Shimadzu, UV-2450, Japan). FL spectra were recorded on a fluorospectro photometer (Shimadzu, RF-5301PC, Japan) with a xenon lamp excitation source. Particle size analysis was determined at room temperature on a Brookhaven 90 Plus Particle Size Analyzer. TEM micrographs of particle size were obtained using HT7700 transmission electron microscope by copper net as a supporter. SXR D spectra was obtained using Xeuss with SAXS/WAXS system. Distilled water was filtered through a membrane with 0.22 $\mu$ m pore size. Tetrahydrofuran (THF) was distilled from sodium prior to use.

Absorption and emission spectra of these compounds in solutions were measured in THF with a concentration scale of 10<sup>-5</sup> M. Nanoparticles were formed by adding a certain volume of water into its dilute THF solution with a rotlet stirring sharply for 10 minutes, all the solution concentration was same. The absorption spectra, FL spectra and particle size distribution (DLS) of the resulting solutions were then performed immediately.

Preparation of TEM sample: solution of nanoparticles was added to a copper net with carbon membrane. Then the copper net was dried by infrared lamp.

**Table S1** Optimization of the [4+1] reaction conditions<sup>a</sup>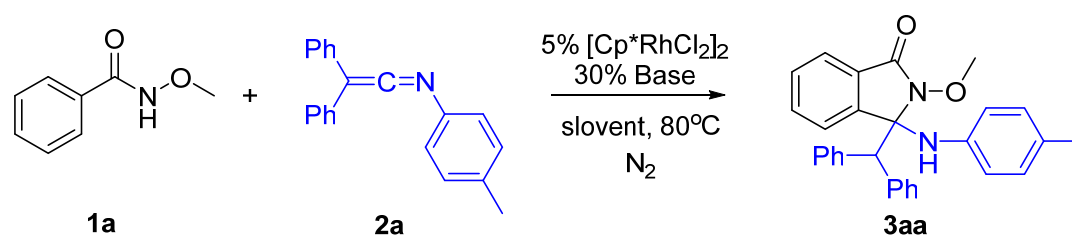

| Entry           | Solvent                         | Base(equiv.)           | T(°C) | Atom-<br>sphere | Cat.<br>(%) | Add-<br>itive          | <b>1a:2a</b> | Yield(%) <sup>b</sup> |
|-----------------|---------------------------------|------------------------|-------|-----------------|-------------|------------------------|--------------|-----------------------|
| 1               | DCE                             | CsOAc                  | 80    | N <sub>2</sub>  | 5           | -                      | 1:2          | 46                    |
| 2               | CH <sub>3</sub> CN              | CsOAc                  | 80    | N <sub>2</sub>  | 5           | -                      | 1:2          | trace                 |
| 3               | Toluene                         | CsOAc                  | 80    | N <sub>2</sub>  | 5           | -                      | 1:2          | 28                    |
| 4               | 1,4-Dioxane                     | CsOAc                  | 80    | N <sub>2</sub>  | 5           | -                      | 1:2          | Trace                 |
| 5               | CH <sub>2</sub> Cl <sub>2</sub> | CsOAc                  | 80    | N <sub>2</sub>  | 5           | -                      | 1:2          | 40                    |
| 6               | Acetone                         | CsOAc                  | 80    | N <sub>2</sub>  | 5           | -                      | 1:2          | 35                    |
| 7               | DCE                             | CsOAc                  | r.t.  | N <sub>2</sub>  | 5           | -                      | 1:2          | N.D.                  |
| 8               | DCE                             | CsOAc                  | 50    | N <sub>2</sub>  | 5           | -                      | 1:2          | 21                    |
| 9               | DCE                             | CsOAc                  | 100   | N <sub>2</sub>  | 5           | -                      | 1:2          | 45                    |
| 10              | DCE                             | CsOAc                  | 80    | air             | 5           | -                      | 1:2          | 16                    |
| 11              | DCE                             | CsOAc                  | 80    | O <sub>2</sub>  | 5           | -                      | 1:2          | Trace                 |
| 12 <sup>c</sup> | DCE                             | CsOAc                  | 80    | N <sub>2</sub>  | 5           | -                      | 1:2          | 40                    |
| 13              | DCE                             | NaOAc                  | 80    | N <sub>2</sub>  | 5           | -                      | 1:2          | 17                    |
| 14              | DCE                             | KOAc                   | 80    | N <sub>2</sub>  | 5           | -                      | 1:2          | 45                    |
| 15              | DCE                             | Cl <sub>3</sub> CCOONa | 80    | N <sub>2</sub>  | 5           | -                      | 1:2          | 55                    |
| 16              | DCE                             | PivOCs                 | 80    | N <sub>2</sub>  | 5           | -                      | 1:2          | 39                    |
| 17              | DCE                             | Cl <sub>3</sub> CCOOCs | 80    | N <sub>2</sub>  | 5           | -                      | 1:2          | 78                    |
| 18              | DCE                             | Cl <sub>3</sub> CCOOK  | 80    | N <sub>2</sub>  | 5           | -                      | 1:2          | 70                    |
| 19 <sup>d</sup> | DCE                             | Cl <sub>3</sub> CCOOCs | 80    | N <sub>2</sub>  | 5           | -                      | 1:2          | N.D.                  |
| 20 <sup>e</sup> | DCE                             | Cl <sub>3</sub> CCOOCs | 80    | N <sub>2</sub>  | 5           | -                      | 1:2          | N.D.                  |
| 21              | DCE                             | None                   | 80    | N <sub>2</sub>  | 5           | -                      | 1:2          | N.D.                  |
| 22              | DCE                             | Cl <sub>3</sub> CCOOCs | 80    | N <sub>2</sub>  | 5           | H <sub>2</sub> O(1eq.) | 1:2          | N.D.                  |
| 23              | DCE                             | Cl <sub>3</sub> CCOOCs | 80    | N <sub>2</sub>  | 5           | 4A MS <sup>f</sup>     | 1:2          | 82                    |
| 24              | DCE                             | Cl <sub>3</sub> CCOOCs | 80    | N <sub>2</sub>  | 5           | 4A MS <sup>f</sup>     | 1:1.5        | 81                    |
| 25              | DCE                             | Cl <sub>3</sub> CCOOCs | 80    | N <sub>2</sub>  | 5           | 4A MS <sup>f</sup>     | 1:1.2        | 80                    |
| 26              | DCE                             | Cl <sub>3</sub> CCOOCs | 80    | N <sub>2</sub>  | 5           | 4A MS <sup>f</sup>     | 1:1          | 71                    |
| 27              | DCE                             | Cl <sub>3</sub> CCOOCs | 80    | N <sub>2</sub>  | 5           | 4A MS <sup>f</sup>     | 1.2:1        | 81                    |
| 28              | DCE                             | Cl <sub>3</sub> CCOOCs | 80    | N <sub>2</sub>  | 5           | 4A MS <sup>f</sup>     | 1.5:1        | 82                    |
| 29              | DCE                             | Cl <sub>3</sub> CCOOCs | 80    | N <sub>2</sub>  | 5           | 4A MS <sup>f</sup>     | 2:1          | 84                    |
| 30              | DCE                             | Cl <sub>3</sub> CCOOCs | 80    | N <sub>2</sub>  | 4           | 4A MS <sup>f</sup>     | 1.2:1        | 76                    |
| 31              | DCE                             | Cl <sub>3</sub> CCOOCs | 80    | N <sub>2</sub>  | 2.5         | 4A MS <sup>f</sup>     | 1.2:1        | 70                    |

<sup>a</sup>Reaction condition: **1a** (0.3 mmol), **2a** (0.6 mmol), [Cp\*RhCl<sub>2</sub>]<sub>2</sub> (0.015 mmol), Base (0.09 mmol), Solvent (2 mL), N<sub>2</sub>, 80 °C, 10 h. <sup>b</sup>Isolated yield. <sup>c</sup>CsOAc(1 equiv). <sup>d</sup>2% [Cp\*IrCl<sub>2</sub>]<sub>2</sub> instead of [Cp\*RhCl<sub>2</sub>]<sub>2</sub>. <sup>e</sup>5% [RuCl<sub>2</sub>(*p*-cymene)]<sub>2</sub> instead of [Cp\*RhCl<sub>2</sub>]<sub>2</sub>. <sup>f</sup>4Å MS (60 mg).

**Table S2.** Photophysical properties of compounds **4a-p** and **5a-d**

|           | $\lambda_{\text{abs}}(\text{nm})$     |                                        |                   |                         | $\lambda_{\text{em}}(\text{nm})$ |       | $\Phi_{\text{F}} (\%)$           |                                   |                                        |
|-----------|---------------------------------------|----------------------------------------|-------------------|-------------------------|----------------------------------|-------|----------------------------------|-----------------------------------|----------------------------------------|
|           | THF, ( $\epsilon/10^4$ ) <sup>a</sup> | Nano, ( $\epsilon/10^4$ ) <sup>b</sup> | Cal. <sup>c</sup> | % $\Delta$ <sup>d</sup> | Nano                             | Solid | $\Phi_{\text{sol}}$ <sup>e</sup> | $\Phi_{\text{nano}}$ <sup>e</sup> | $\Phi_{\text{nano}}/\Phi_{\text{sol}}$ |
| <b>4a</b> | 373(2.37)                             | 375(1.87)                              | 375               | 0.7                     | 516                              | 507   | 0.028                            | 2.572                             | 91.9                                   |
| <b>4b</b> | 373(1.78)                             | 377(1.53)                              | 375               | 0.5                     | 514                              | 482   | 0.028                            | 2.571                             | 91.7                                   |
| <b>4c</b> | 372(1.85)                             | 377(1.62)                              | 381               | 2.3                     | 523                              | 507   | 0.022                            | 1.773                             | 80.6                                   |
| <b>4d</b> | 376 (1.99)                            | 381(1.62)                              | 372               | -1.1                    | 508                              | 510   | 0.034                            | 2.969                             | 87.3                                   |
| <b>4e</b> | 372(2.09)                             | 379(1.81)                              | 378               | 1.7                     | 515                              | 498   | 0.045                            | 4.296                             | 95.5                                   |
| <b>4f</b> | 405(2.61)                             | 407(1.99)                              | 395               | -2.6                    | 533                              | 491   | 0.031                            | 1.352                             | 43.6                                   |
| <b>4g</b> | 375(1.98)                             | 377(1.54)                              | 378               | 0.8                     | 518                              | 500   | 0.049                            | 3.324                             | 67.8                                   |
| <b>4h</b> | 394(2.64)                             | 398(2.00)                              | 394               | 0.0                     | 542                              | 519   | 0.077                            | 12.571                            | 163.3                                  |
| <b>4i</b> | 412(2.24)                             | 415(1.55)                              | 403               | -2.3                    | 535                              | 534   | 0.053                            | 2.294                             | 43.3                                   |
| <b>4j</b> | 387(2.29)                             | 388(1.86)                              | 381               | -1.6                    | 518                              | 501   | 0.076                            | 7.865                             | 103.5                                  |
| <b>4k</b> | 374(2.09)                             | 378(1.73)                              | 380               | 1.7                     | 516                              | 525   | 0.046                            | 1.967                             | 42.8                                   |
| <b>4l</b> | 375(1.95)                             | 379(1.65)                              | 370               | -1.5                    | 515                              | 527   | 0.041                            | 2.102                             | 51.3                                   |
| <b>4m</b> | 362(1.21)                             | 371(0.97)                              | 363               | 0.3                     | 502                              | 511   | 0.039                            | 1.374                             | 35.2                                   |
| <b>4n</b> | 357(1.47)                             | 362(1.19)                              | 356               | -0.2                    | 492                              | 499   | 0.031                            | 0.554                             | 18                                     |
| <b>4o</b> | 364(1.89)                             | 370(1.34)                              | 362               | -0.5                    | 501                              | 490   | 0.017                            | 1.291                             | 77.3                                   |
| <b>4p</b> | 362(1.81)                             | 362(1.57)                              | 355               | -2.1                    | 492                              | 460   | 0.025                            | 0.660                             | 26.4                                   |
| <b>5a</b> | 348(1.57)                             | 349 (0.10)                             | 346               | -0.4                    | 454                              | 449   | 0.514                            | 4.680                             | 9.1                                    |
| <b>5b</b> | 348(1.60)                             | 349(0.16)                              | 349               | 0.2                     | 455                              | 458   | 0.025                            | 0.657                             | 26.3                                   |
| <b>5c</b> | 349(1.73)                             | 354(0.07)                              | 351               | 0.6                     | 441                              | 451   | 0.269                            | 8.797                             | 32.7                                   |
| <b>5d</b> | 343(1.17)                             | 348(0.16)                              | 343               | 0.0                     | 445                              | 446   | 0.045                            | 1.606                             | 35.7                                   |

<sup>a</sup>Absorption spectra were measured at a concentration scale of  $10^{-5}$  in THF solution; <sup>b</sup>Nano-suspensions were obtained by adding water into dilute THF solution (water/THF = 95/5); <sup>c</sup>Calculated absorption wavelengths were obtained from HOMO-LUMO gaps using the B3LYP functional and the 6-31G\* basis set. <sup>d</sup>%  $\Delta = 100 * (\text{Cal.} - \text{THF}) / \text{Cal.}$ . <sup>e</sup>Quantum yields were calculated referring to the standard of Quinine sulfate ( $\Phi = 0.54$  in 0.1M  $\text{H}_2\text{SO}_4$ ).

## Preparation of Cesium 2,2,2-trichloroacetate and potassium

### 2,2,2-trichloroacetate

Cesium pivalate was prepared according to the reported procedure.<sup>1</sup>

2,2,2-Trichloroacetic acid (3.24 g, 20 mmol) and cesium carbonate (3.28 g, 10 mmol) or potassium carbonate (1.38 g, 10 mmol) was dissolved in CH<sub>3</sub>OH (20 mL). The resulting solution was stirred during 30 min at 50 °C. The solvent was then evaporated under reduced pressure until a white solid appeared. The obtained solid was crushed into a fine powder and dry under high vacuum at 80 °C during 8 h.

### General Procedure for the Preparation of N-methoxybenzamides 1

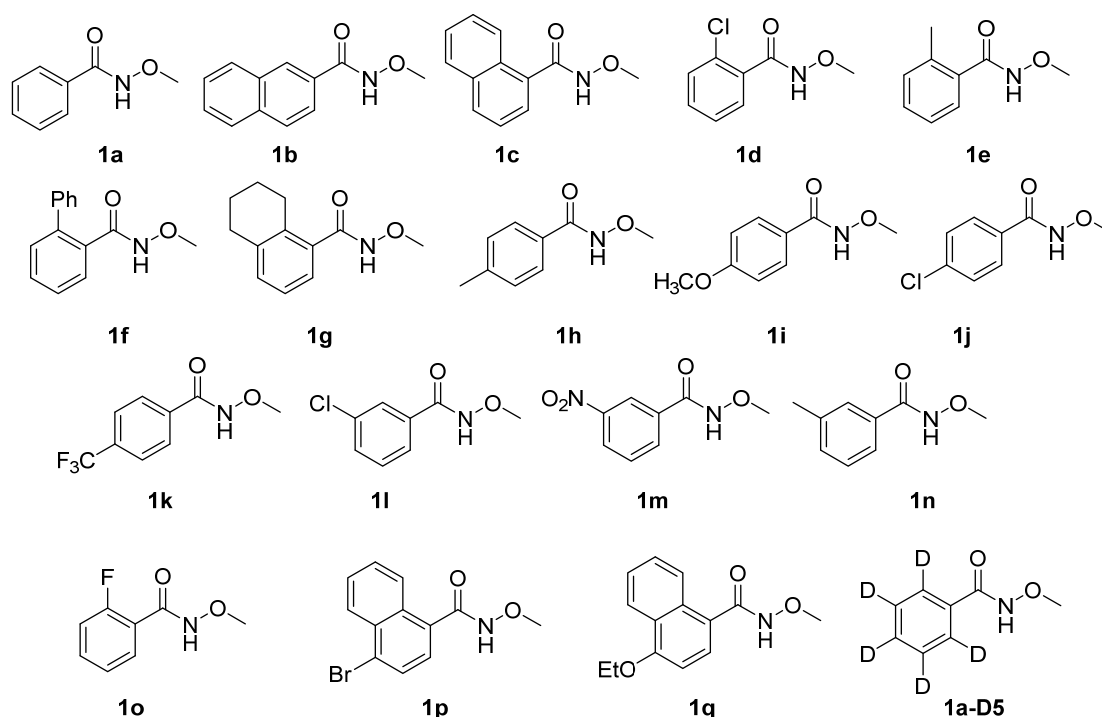

Compounds **1a** – **1o**, **1a-D5** as well as new compounds **1p** and **1q** were prepared according to the literature procedures.<sup>2</sup>

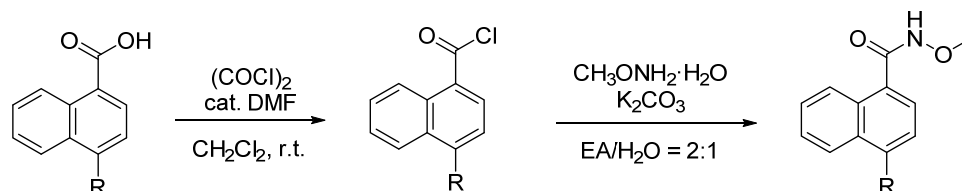

<sup>1</sup> (a) M. A. Campo and R. C. Larock, *Org. Lett.* **2000**, *2*, 3675. (b) T. Piou, A. Bunescu, Q. Wang, L. Neuville and J. Zhu, *Angew. Chem., Int. Ed.* **2013**, *52*, 12385.

<sup>2</sup> (a) N. Guimond, C. Gouliaras and K. Fagnou, *J. Am. Chem. Soc.* **2010**, *132*, 6908. (b) S. Rakshit, C. Grohmann, T. Besset and F. Glorius, *J. Am. Chem. Soc.* **2011**, *133*, 2350. (c) L. E. Fisher, J. M. Caroon, Jahangir, S. R. Stabler, S. Lundberg and J. M. Muchowski, *J. Org. Chem.* **1993**, *58*, 3643.

4-Substituted-1-naphthoic acid (2 mmol) was dissolved in dry dichloromethane (5 mL), followed by addition of a drop of DMF and oxalyl chloride (0.21 mL, 1.49 g/mL, 2.4 mmol). After 2 hour, the volatile and solvent were evaporated and the resulting acid chloride was obtained and used directly for the subsequent reactions without further purification. To the crude product was then added  $K_2CO_3$  (4 mmol),  $MeONH_2 \cdot HCl$  (2.4 mmol), ethyl acetate (5 mL), and water (2.5 mL) sequentially. The resulting mixture was stirred for 16 h at r.t. and extracted twice with ethyl acetate. The combined organic layers were dried over  $Na_2SO_4$ , filtered, and evaporated under reduced pressure. The products were obtained as pure solids without need for purification.

#### 4-Bromo-*N*-methoxy-1-naphthamide (**1p**)

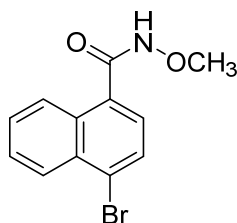

Following the general procedure afforded **1p** (530 mg, 95 %) as a white solid, **m.p.** 140 – 146 °C.

$^1H$  NMR (400 MHz,  $DMSO-d_6$ )  $\delta$  11.80 (s, 1H), 8.22 (td,  $J = 8.9, 1.5$  Hz, 2H), 7.96 (d,  $J = 7.6$  Hz, 1H), 7.82 – 7.68 (m, 2H), 7.52 (d,  $J = 7.6$  Hz, 1H), 3.81 (s, 3H).

$^{13}C$  NMR (101 MHz,  $DMSO-d_6$ )  $\delta$  164.6, 131.8, 131.2, 131.1, 129.2, 128.4, 128.1, 126.8, 126.3, 125.7, 124.3, 63.5.

IR (ATR): 3140, 2979, 1640, 1563, 1512, 1439, 1296, 1256, 1193, 1072, 1006, 920, 846, 818, 756  $cm^{-1}$ ;

HRMS (EI)  $m/z$  calcd for  $C_{12}H_{10}NO_2Br$  [ $M^+$ ]: 278.9895; found: 278.9899.

#### 4-Ethoxy-*N*-methoxy-1-naphthamide (**1q**)

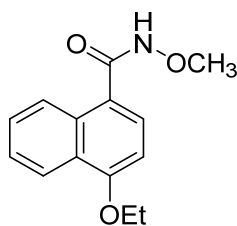

Following the general procedure afforded **1q** (451 mg, 92 %) as a white solid, **m.p.** 153 – 154 °C.

$^1H$  NMR (400 MHz, Chloroform-*d*)  $\delta$  8.54 (s, 1H), 8.33 (dd,  $J = 8.3, 1.5$  Hz, 2H), 7.61 – 7.48 (m, 3H), 6.71 (d,  $J = 7.9$  Hz, 1H), 4.23 (q,  $J = 7.0$  Hz, 2H), 3.95 (s, 3H), 1.57 (t,  $J = 7.0$  Hz, 3H).

$^{13}C$  NMR (101 MHz, Chloroform-*d*)  $\delta$  157.3, 131.6, 127.9, 126.9, 125.8, 124.9, 122.4, 122.3, 102.8, 64.8, 64.0, 14.7.

IR (ATR): 3130, 2979, 1638, 1581, 1516, 1383, 1263, 1243, 1155, 1112, 1070, 1030, 954, 902, 839, 758  $cm^{-1}$ ;

HRMS (EI)  $m/z$  calcd for  $C_{14}H_{15}NO_3$  [ $M^+$ ]: 245.1052; found: 245.1053.

## General Procedure for the Preparation of Ketenimines **2**

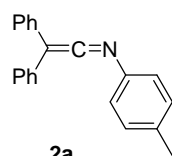

CAS: 5110-45-2

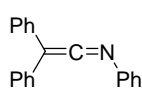

CAS: 14181-84-1

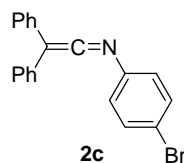

CAS: 29376-76-9

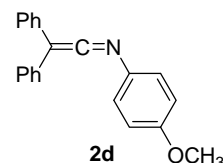

CAS: 40012-82-6

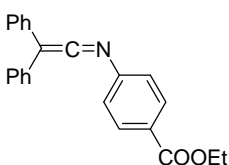

CAS: 1821097-99-7

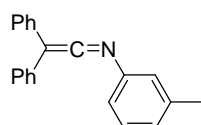

CAS: 17205-61-7

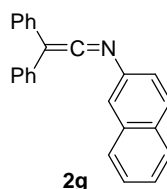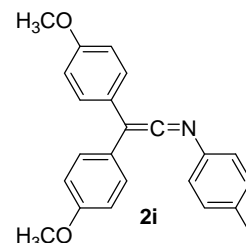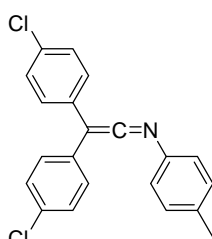

CAS: 22731-54-0

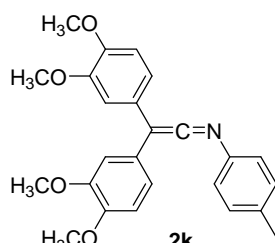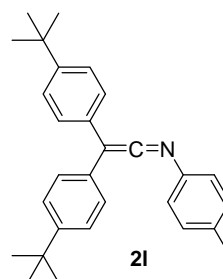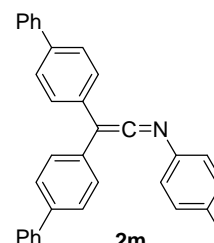

Compounds **2a-2f**, **2j** as well as new compounds **2g**, **2i**, and **2k-2m** were prepared according to the literature procedures.<sup>3</sup>

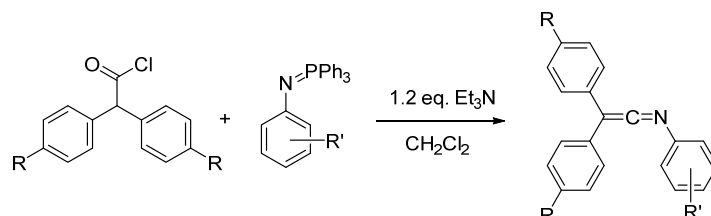

To a mixture of corresponding N-(triphenylphosphoranylidene)aniline (2 mmol), Et<sub>3</sub>N (2.4 mmol) in CH<sub>2</sub>Cl<sub>2</sub> (5 mL) was added corresponding 2,2-diarylacetyl chloride (2 mmol) in CH<sub>2</sub>Cl<sub>2</sub> (5 mL) dropwise. The mixture was stirred at room temperature for 15 min and then evaporated on vacuum. The residue was subjected to silica gel column chromatography with petroleum ether as eluent.

### 2,2-Diphenyl-N-(*m*-tolyl)ethen-1-imine (**2f**)

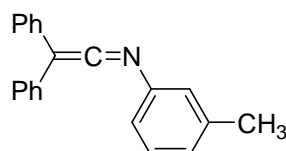

Following the general procedure afforded **2f** (504 mg, 89 %) as a brown oil.

<sup>1</sup>H NMR (400 MHz, Chloroform-*d*) δ 7.38 – 7.32 (m, 8H), 7.28 – 7.17 (m, 5H), 7.10 (d, *J* = 7.5 Hz, 1H), 2.36 (s, 3H).

<sup>3</sup> X. Zhou, Z. Jiang, L. Xue, P. Lu and Y. Wang, *Eur. J. Org. Chem.* **2015**, 2015, 5789.

<sup>13</sup>C NMR (101 MHz, Chloroform-*d*) δ 190.1 , 139.6 , 134.0 , 129.3 , 128.8 , 128.6 , 127.8 , 126.4 , 124.5 , 121.1 , 77.8 , 21.3 .

IR (film): 3057, 3023, 2001, 1596, 1581, 1493, 1454, 1175, 1123, 1072, 1030, 760, 694, 645 cm<sup>-1</sup>;

HRMS (EI) m/z calcd for C<sub>21</sub>H<sub>17</sub>N [M<sup>+</sup>]: 283.1361; found: 283.1365.

#### *N*-(naphthalen-2-yl)-2,2-diphenylethen-1-imine (**2g**)

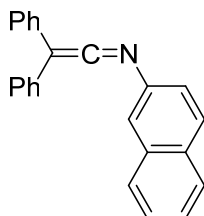

Following the general procedure afforded **2g** (478 mg, 75 %) as a brown solid, **m.p.** 113 – 116 °C.

<sup>1</sup>H NMR (400 MHz, Chloroform-*d*) δ 7.86 – 7.81 (m, 4H), 7.56 – 7.47 (m, 3H), 7.42 – 7.33 (m, 8H), 7.26 – 7.22 (m, 2H).

<sup>13</sup>C NMR (101 MHz, Chloroform-*d*) δ 191.1 , 137.8 , 133.9 , 133.7 , 132.7 , 129.6 , 128.9 , 128.1 , 127.9 , 127.8 , 126.8 , 126.5 , 126.4 , 122.9 , 122.0 , 78.3 .

IR (ATR): 1990, 1594, 1492, 1452, 1286, 1155, 1070, 1027, 815, 746, 693 cm<sup>-1</sup>;

HRMS (EI) m/z calcd for C<sub>24</sub>H<sub>17</sub>N [M<sup>+</sup>]: 319.1361; found: 319.1359.

#### 2,2-Bis(4-methoxyphenyl)-*N*-(*p*-tolyl)ethen-1-imine (**2i**)

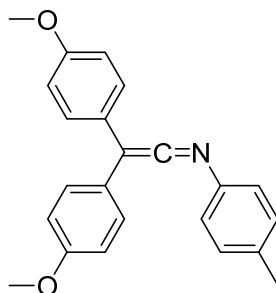

Following the general procedure afforded **2i** (631 mg, 92 %) as a brown oil.

<sup>1</sup>H NMR (400 MHz, Chloroform-*d*) δ 7.30 – 7.21 (m, 6H), 7.17 (d, *J* = 7.8 Hz, 2H), 6.93 – 6.85 (m, 4H), 3.80 (s, 6H), 2.35 (s, 3H).

<sup>13</sup>C NMR (101 MHz, Chloroform-*d*) δ 192.5 , 158.3 , 138.5 , 137.6 , 130.0 , 128.9 , 126.2 , 123.7 , 114.3 , 77.1 , 55.3 , 21.1 .

IR (film): 2953, 2834, 1990, 1606, 1504, 1246, 1174, 1034, 829 cm<sup>-1</sup>;

HRMS (EI) m/z calcd for C<sub>23</sub>H<sub>21</sub>NO<sub>2</sub> [M<sup>+</sup>]: 343.1572; found: 343.1571.

#### 2,2-Bis(4-chlorophenyl)-*N*-(*p*-tolyl)ethen-1-imine (**2j**)



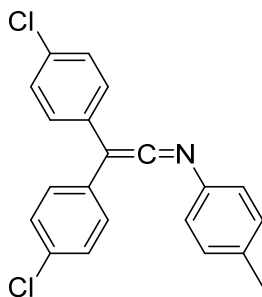

Following the general procedure afforded **2j** (498 mg, 71 %) as a brown oil.

<sup>1</sup>H NMR (400 MHz, Chloroform-*d*) δ 7.33 – 7.28 (m, 4H), 7.28 – 7.17 (m, 8H), 2.37 (s, 3H).

<sup>13</sup>C NMR (101 MHz, Chloroform-*d*) δ 187.9 , 138.4 , 137.0 , 132.4 , 132.1 , 130.3 , 129.1 , 128.8 , 124.0 , 76.3 , 21.2 .

IR (ATR): 2923, 1997, 1582, 1490, 1415, 1280, 1187, 1094, 1014, 911, 824, 751 cm<sup>-1</sup>;

HRMS (EI) m/z calcd for C<sub>21</sub>H<sub>15</sub>NCl<sub>2</sub> [M<sup>+</sup>]: 351.0582; found: 351.0581.

### 2,2-Bis(3,4-dimethoxyphenyl)-N-(p-tolyl)ethen-1-imine (**2k**)

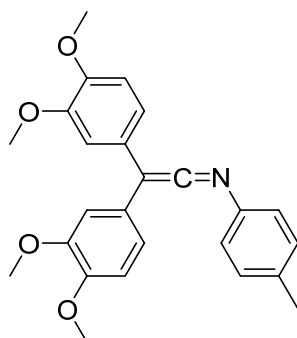

Following the general procedure afforded **2k** (446 mg, 65 %) as a brown oil.

<sup>1</sup>H NMR (400 MHz, Chloroform-*d*) δ 7.29 (d, *J* = 8.3 Hz, 2H), 7.18 (d, *J* = 8.1 Hz, 2H), 6.92 – 6.83 (m, 6H), 3.87 (s, 6H), 3.81 (s, 6H), 2.35 (s, 3H).

<sup>13</sup>C NMR (101 MHz, Chloroform-*d*) δ 191.8 , 149.1 , 147.6 , 138.2 , 137.6 , 130.0 , 126.4 , 123.6 , 120.1 , 111.4 , 110.8 , 77.6 , 55.8 , 55.7 , 21.0 .

IR (film): 2953, 2834, 1990, 1606, 1504, 1246, 1174, 1034, 829 cm<sup>-1</sup>;

HRMS (EI) m/z calcd for C<sub>23</sub>H<sub>21</sub>NO<sub>2</sub> [M<sup>+</sup>]: 343.1572; found: 343.1571.

### 2,2-Bis(4-(*tert*-butyl)phenyl)-N-(p-tolyl)ethen-1-imine (**2l**)

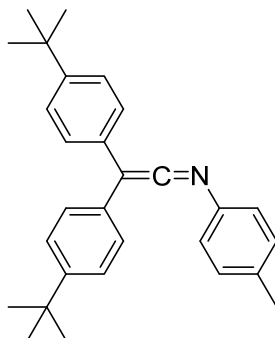

Following the general procedure afforded **2l** (561 mg, 71 %) as a yellow solid, **m.p.** 113 – 115 °C.

$^1\text{H NMR}$  (400 MHz, Chloroform-*d*)  $\delta$  7.38 – 7.34 (m, 4H), 7.31 – 7.26 (m, 6H), 7.17 (d,  $J = 8.2$  Hz, 2H), 2.36 (s, 3H), 1.32 (s, 18H).

$^{13}\text{C NMR}$  (101 MHz, Chloroform-*d*)  $\delta$  191.4, 149.3, 138.2, 137.7, 131.1, 130.0, 127.4, 125.7, 123.9, 77.6, 34.5, 31.3, 21.1.

**IR** (ATR): 2958, 2924, 2865, 1992, 1505, 1462, 1363, 1269, 1189, 1113, 1019, 828, 750, 717  $\text{cm}^{-1}$ ;

**HRMS** (EI)  $m/z$  calcd for  $\text{C}_{29}\text{H}_{33}\text{N}$  [ $\text{M}^+$ ]: 395.2613; found: 395.2614

## 2,2-Di([1,1'-biphenyl]-4-yl)-*N*-(*p*-tolyl)ethen-1-imine (**2m**)

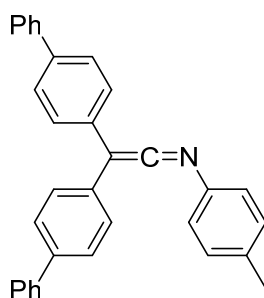

Following the general procedure afforded **2m** (609 mg, 70 %) as a yellow solid, **m.p.** 119 – 120  $^{\circ}\text{C}$ .

$^1\text{H NMR}$  (400 MHz, Chloroform-*d*)  $\delta$  7.63 – 7.58 (m, 8H), 7.48 – 7.41 (m, 8H), 7.37 – 7.30 (m, 4H), 7.21 (d,  $J = 8.2$  Hz, 2H), 2.38 (s, 3H).

$^{13}\text{C NMR}$  (101 MHz, Chloroform-*d*)  $\delta$  189.7, 140.7, 139.3, 138.1, 133.1, 130.2, 128.8, 128.1, 127.5, 127.2, 126.9, 124.0, 77.5, 21.2.

**IR** (ATR): 3028, 2923, 1990, 1602, 1485, 1413, 1284, 1186, 909, 837, 821, 764, 730, 696, 664  $\text{cm}^{-1}$ ;

**HRMS** (EI)  $m/z$  calcd for  $\text{C}_{33}\text{H}_{25}\text{N}$  [ $\text{M}^+$ ]: 435.1987; found: 435.1978.

### General Procedures for the Preparation of 2,2-Di(substitutedphenyl)acetyl chloride

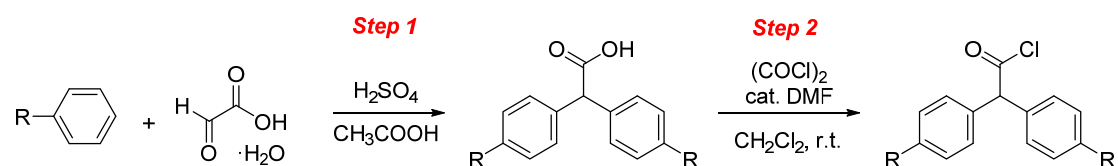

#### Step 1:

Condition A ( $R = \text{OCH}_3$  or 1,2 - dimethoxy):

Following a modified procedure described by Li<sup>4</sup>. A solution of glyoxylic acid (50 mmol) and Substituted benzene (100 mmol) in acetic acid (100 mL) was cooled in an ice bath. Concentrated sulfuric acid (6 mL) was added dropwise under stirring. The solution was then stirred at 40  $^{\circ}\text{C}$  overnight. After most solvent was removed under reduced pressure, the residue was triturated with dichloromethane (200 mL). The solution was washed with aqueous sodium carbonate solution to pH 6, water, and brine and dried over  $\text{Na}_2\text{SO}_4$ . After removed the solvent under reduce pressure, afforded the corresponding acid. The product was used for the next step directly without further purification.

Condition B ( $R = \text{Cl}$ , *t*-Bu, *Ph*):

<sup>4</sup> X. Shao, X. Jiang, X. Zhao, C. Zhao, Y. Chen and Z. Li, *J. Org. Chem.* **2004**, *69*, 899.

Following a modified procedure described by Marzabadi<sup>5</sup>. Substituted benzene (100 mmol) and glyoxylic acid monohydrate (50 mmol) were dissolved in acetic acid (60 mL). The mixture was cooled in an ice/water bath and concentrated sulfuric acid (50 mL) was added dropwise over 0.5 h. The mixture was stirred at 80°C for 12 h and then cooled to room temperature. Water (300 mL) was added and a dark solid was precipitated. The solid was washed with water (50 mL) and petroleum ether (3\*50 mL) and dried in vacuum to give the desired product, which was used in the subsequent step without further purification.

**Step 2:**

2,2-diarylacetic acid (1.0 equiv) was dissolved in dry dichloromethane (c 0.4 M), followed by addition of a drop of DMF and oxalyl chloride (1.2 equiv). After 2 hour, the volatile and solvent were evaporated and the resulting acid chloride was obtained and used directly for the subsequent reactions without further purification.

## Synthetic Procedure and Characterization Data for 3

### Typical procedure for the preparation of 3-benzhydryl-2-methoxy-3-(*p*-tolylamino)-isoindolin-1-one (3a)

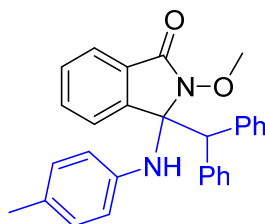

To an oven-dried Schlenk tube equipped with a magnetic stirring bar were added sequentially **1a** (0.36 mmol), **2a** (0.3 mmol), [Cp\*RhCl<sub>2</sub>]<sub>2</sub> (0.015 mmol), Cl<sub>3</sub>CCOOCs (0.09 mmol), 4A MS (60 mg) and dry DCE (2 mL) under N<sub>2</sub> atmosphere. The reaction vessel was heated to 80 °C in oil bath for 10 hours. Upon completion, The reaction mixture was cooled to room temperature and then the solvent was evaporated in vacuum. The residue was purified by column chromatography on silica gel (petroleum ether/ethyl acetate 4:1) to give the product **3a** (107 mg, 82 %) as a white solid; **m.p.** 159 – 161 °C.

<sup>1</sup>H NMR (400 MHz, CDCl<sub>3</sub>) δ 7.65 (d, *J* = 7.4 Hz, 1H), 7.54 (td, *J* = 7.5, 1.1 Hz, 1H), 7.47-7.41 (m, 4.1 Hz, 4H), 7.34 – 7.22 (m, 3H), 7.20 – 7.10 (m, 5H), 6.71 (d, *J* = 8.3 Hz, 2H), 6.04 (d, *J* = 8.5 Hz, 2H), 4.92 (s, 1H), 4.51 (s, 1H), 3.82 (s, 3H), 2.09 (s, 3H).

<sup>13</sup>C NMR (101 MHz, CDCl<sub>3</sub>) δ 163.5, 141.8, 140.8, 137.7, 136.8, 131.9, 131.1, 130.4, 130.1, 129.4, 129.3, 128.63, 128.60, 128.2, 127.74, 127.73, 123.6, 123.4, 115.2, 82.0, 64.6, 61.1, 20.3.

IR (film): 3418, 2939, 1713, 1615, 1519, 1495, 1451, 1301, 1073, 1002, 908, 809, 716 cm<sup>-1</sup>;

HRMS (EI) *m/z* calcd for C<sub>29</sub>H<sub>26</sub>N<sub>2</sub>O<sub>2</sub> [M<sup>+</sup>]: 434.1994; found:434.2009.

### 3-Benzhydryl-2-methoxy-5-methyl-3-(*p*-tolylamino)isoindolin-1-one (3b)

<sup>5</sup> Y. Jiang, C. Chen, K. Lu, I. Daniewska, J. De Leon, R. Kong, C. Forray, B. Li, L. G. Hegde, T. D. Wolinsky, D. A. Craig, J. M. Wetzel, K. Andersen and M. R. Marzabadi, *J. Med. Chem.* **2007**, *50*, 3870.

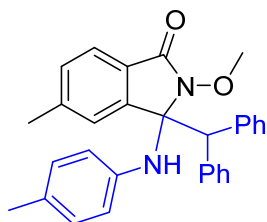

The reaction of **1h** (0.36 mmol), **2a** (0.3 mmol),  $[\text{Cp}^*\text{RhCl}_2]_2$  (0.015 mmol),  $\text{Cl}_3\text{CCOOCs}$  (0.09 mmol) and 4A MS (60 mg) in DCE (2 mL) following the typical procedure afforded **3b** (108 mg, 80 %) after chromatography on silica gel (petroleum ether/ethyl acetate 4:1) as a white solid; **m.p.** 181 – 182 °C.

**<sup>1</sup>H NMR** (400 MHz,  $\text{CDCl}_3$ )  $\delta$  7.53 (d,  $J = 7.7$  Hz, 1H), 7.39 (d,  $J = 6.6$  Hz, 2H), 7.30 – 7.22 (m, 5H), 7.22 – 7.14 (m, 5H), 6.72 (d,  $J = 8.3$  Hz, 2H), 6.05 (d,  $J = 8.5$  Hz, 2H), 4.87 (s, 1H), 4.50 (s, 1H), 3.77 (s, 3H), 2.43 (s, 3H), 2.10 (s, 3H).

**<sup>13</sup>C NMR** (101 MHz,  $\text{CDCl}_3$ )  $\delta$  163.8, 142.7, 142.2, 140.9, 137.7, 137.0, 130.5, 130.3, 130.0, 129.4, 128.5, 128.3, 128.2, 127.7, 127.6, 123.9, 123.2, 115.1, 81.6, 64.5, 61.5, 22.2, 20.3.

**IR** (film): 3418, 2924, 1713, 1620, 1519, 1494, 1451, 1302, 1075, 1008, 908, 808, 729, 707  $\text{cm}^{-1}$ ;

**HRMS** (EI)  $m/z$  calcd for  $\text{C}_{30}\text{H}_{28}\text{N}_2\text{O}_2$  [ $\text{M}^+$ ]: 448.2151; found: 448.2159.

### 3-Benzhydryl-2,5-dimethoxy-3-(p-tolylamino)isoindolin-1-one (3c)

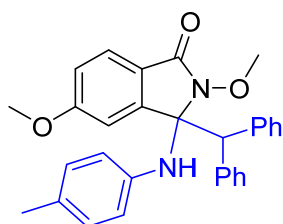

The reaction of **1i** (0.36 mmol), **2a** (0.3 mmol),  $[\text{Cp}^*\text{RhCl}_2]_2$  (0.015 mmol),  $\text{Cl}_3\text{CCOOCs}$  (0.09 mmol) and 4A MS (60 mg) in DCE (2 mL) following the typical procedure afforded **3c** (113 mg, 81 %) after chromatography on silica gel (petroleum ether/ethyl acetate 4:1) as a white solid; **m.p.** 183 – 185 °C.

**<sup>1</sup>H NMR** (400 MHz,  $\text{CDCl}_3$ )  $\delta$  7.58 (d,  $J = 8.4$  Hz, 1H), 7.45 (d,  $J = 7.2$  Hz, 2H), 7.32 – 7.22 (m, 3H), 7.21-7.15 (m, 5H), 6.96 (dd,  $J = 8.4, 2.2$  Hz, 1H), 6.88 (d,  $J = 1.8$  Hz, 1H), 6.73 (d,  $J = 8.3$  Hz, 2H), 6.08 (d,  $J = 8.3$  Hz, 2H), 4.87 (s, 1H), 4.49 (s, 1H), 3.81 (s, 3H), 3.77 (s, 3H), 2.10 (s, 3H).

**<sup>13</sup>C NMR** (101 MHz,  $\text{CDCl}_3$ )  $\delta$  163.9, 163.0, 144.2, 140.8, 137.7, 136.8, 130.4, 130.1, 129.4, 128.6, 128.5, 128.2, 127.7, 125.0, 123.4, 115.4, 115.3, 108.9, 81.5, 64.6, 61.3, 55.6, 20.3.

**IR** (film): 3418, 2939, 1712, 1614, 1519, 1493, 1286, 1250, 1069, 1004, 909, 730, 707  $\text{cm}^{-1}$ ;

**HRMS** (EI)  $m/z$  calcd for  $\text{C}_{30}\text{H}_{28}\text{N}_2\text{O}_3$  [ $\text{M}^+$ ]: 464.2100; found: 464.2094.

### 3-Benzhydryl-5-chloro-2-methoxy-3-(p-tolylamino)isoindolin-1-one (3d)

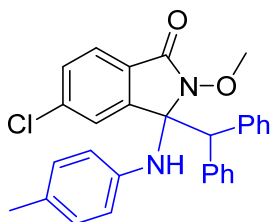

The reaction of **1j** (0.36 mmol), **2a** (0.3 mmol), [Cp\*RhCl<sub>2</sub>]<sub>2</sub> (0.015 mmol), Cl<sub>3</sub>CCOOCs (0.09 mmol) and 4A MS (60 mg) in DCE (2 mL) following the typical procedure afforded **3d** (83 mg, 59 %) after chromatography on silica gel (petroleum ether/ethyl acetate 4:1) as a white solid; **m.p.** 216 – 218 °C.

<sup>1</sup>H NMR (400 MHz, CDCl<sub>3</sub>) δ 7.56 (d, *J* = 8.6 Hz, 1H), 7.42 (d, *J* = 7.6 Hz, 2H), 7.40 (d, *J* = 7.8 Hz, 2H), 7.33 – 7.24 (m, 3H), 7.24 – 7.16 (m, 5H), 6.74 (d, *J* = 8.3 Hz, 2H), 6.05 (d, *J* = 8.4 Hz, 2H), 4.87 (s, 1H), 4.50 (s, 1H), 3.78 (s, 3H), 2.11 (s, 3H).

<sup>13</sup>C NMR (101 MHz, CDCl<sub>3</sub>) δ 162.6, 144.0, 140.4, 138.5, 137.2, 136.5, 130.4, 130.0, 129.9, 129.5, 129.4, 129.0, 128.7, 128.4, 127.92, 127.90, 124.6, 123.8, 115.2, 81.6, 64.5, 61.4, 20.3.

IR (film): 3418, 2939, 1715, 1614, 1519, 1495, 1424, 1301, 1140, 1090, 909, 732, 707 cm<sup>-1</sup>;

HRMS (EI) *m/z* calcd for C<sub>28</sub>H<sub>21</sub>N<sub>2</sub>OCl [M-CH<sub>4</sub>O]<sup>+</sup>: 436.1342; found:436.1339.

MALDI-TOF-MS *m/z* 469.16 ([M+H]<sup>+</sup>);

### 3-Benzhydryl-2-methoxy-3-(*p*-tolylamino)-5-(trifluoromethyl)isoindolin-1-one (**3e**)

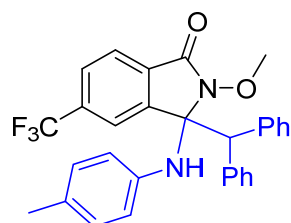

The reaction of **1k** (0.36 mmol), **2a** (0.3 mmol), [Cp\*RhCl<sub>2</sub>]<sub>2</sub> (0.015 mmol), Cl<sub>3</sub>CCOOCs (0.09 mmol) and 4A MS (60 mg) in DCE (2 mL) following the typical procedure afforded **3e** (92 mg, 61 %) after chromatography on silica gel (petroleum ether/ethyl acetate 4:1) as a white solid; **m.p.** 200 – 201 °C.

<sup>1</sup>H NMR (400 MHz, CDCl<sub>3</sub>) δ 7.76 (d, *J* = 7.9 Hz, 1H), 7.72 (d, *J* = 8.4 Hz, 1H), 7.66 (s, 1H), 7.36 (d, *J* = 6.6 Hz, 2H), 7.32 – 7.24 (m, 3H), 7.24 – 7.13 (m, 5H), 6.73 (d, *J* = 8.3 Hz, 2H), 6.03 (d, *J* = 8.4 Hz, 2H), 4.89 (s, 1H), 4.55 (s, 1H), 3.79 (s, 3H), 2.10 (s, 3H).

<sup>13</sup>C NMR (101 MHz, CDCl<sub>3</sub>) δ 162.0, 143.0, 140.4, 137.0, 136.4, 134.3, 133.7 (q, *J* = 32.8 Hz), 130.3, 129.9, 129.5, 129.3, 128.7, 128.4, 128.0 (d, *J* = 1.2 Hz), 126.5 (q, *J* = 3.8 Hz), 123.8, 123.5 (q, *J* = 271.4 Hz), 120.6 (q, *J* = 3.6 Hz), 115.4, 82.1, 64.5, 61.5, 20.3.

IR (film): 3418, 3030, 2941, 1722, 1715, 1519, 1495, 1324, 1171, 1134, 1089, 1055, 909, 732, 693 cm<sup>-1</sup>;

HRMS (EI) *m/z* calcd for C<sub>29</sub>H<sub>21</sub>N<sub>2</sub>O<sub>2</sub>F<sub>3</sub> [M-CH<sub>4</sub>O]<sup>+</sup>: 470.1606; found:470.1604.

MALDI-TOF-MS *m/z* 503.19 ([M+H]<sup>+</sup>).

### 3-Benzhydryl-6-chloro-2-methoxy-3-(*p*-tolylamino)isoindolin-1-one (**3f**)

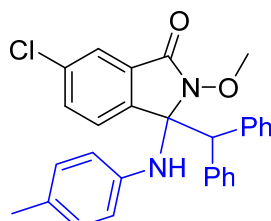

The reaction of **1l** (0.36 mmol), **2a** (0.3 mmol), [Cp\*RhCl<sub>2</sub>]<sub>2</sub> (0.015 mmol), Cl<sub>3</sub>CCOOCs (0.09 mmol) and 4A MS (60 mg) in DCE (2 mL) following the typical procedure afforded **3f** (119 mg, 85 %)

after chromatography on silica gel (petroleum ether/ethyl acetate 4:1) as a white solid; **m.p.** 186 – 188 °C.

**<sup>1</sup>H NMR** (400 MHz, CDCl<sub>3</sub>) δ 7.63 (d, *J* = 1.8 Hz, 1H), 7.50 (dd, *J* = 8.1, 2.0 Hz, 1H), 7.42 (d, *J* = 6.7 Hz, 2H), 7.35 – 7.26 (m, 4H), 7.24 – 7.11 (m, 5H), 6.73 (d, *J* = 8.2 Hz, 2H), 6.04 (d, *J* = 8.5 Hz, 2H), 4.89 (s, 1H), 4.49 (s, 1H), 3.81 (s, 3H), 2.11 (s, 3H).

**<sup>13</sup>C NMR** (101 MHz, CDCl<sub>3</sub>) δ 162.1, 140.5, 140.1, 137.4, 136.5, 135.6, 132.9, 132.0, 130.3, 130.0, 129.5, 129.0, 128.8, 128.3, 127.92, 127.91, 125.0, 123.6, 115.3, 82.0, 64.6, 61.0, 20.3.

**IR** (film): 3418, 2939, 1715, 1614, 1519, 1494, 1452, 1301, 1182, 1088, 909, 808, 733, 706, 631 cm<sup>-1</sup>;

**HRMS** (EI) *m/z* calcd for C<sub>28</sub>H<sub>21</sub>N<sub>2</sub>OCl [M-CH<sub>4</sub>O]<sup>+</sup>: 436.1342; found:436.1343.

**MALDI-TOF-MS** *m/z* 469.17 ([M+H]<sup>+</sup>);

### 3-Benzhydryl-2-methoxy-6-nitro-3-(*p*-tolylamino)isoindolin-1-one (3g)

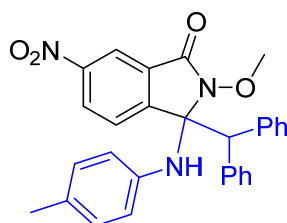

The reaction of **1m** (0.36 mmol), **2a** (0.3 mmol), [Cp\**Rh*Cl<sub>2</sub>]<sub>2</sub> (0.015 mmol), Cl<sub>3</sub>CCOOCs (0.09 mmol) and 4A MS (60 mg) in DCE (2 mL) following the typical procedure afforded **3g** (14 mg, 10 %) after chromatography on silica gel (petroleum ether/ethyl acetate 4:1) as a yellow solid; **m.p.** 186 – 188 °C.

**<sup>1</sup>H NMR** (400 MHz, CDCl<sub>3</sub>) δ 8.46 (d, *J* = 1.8 Hz, 1H), 8.40 (dd, *J* = 8.3, 2.2 Hz, 1H), 7.61 (d, *J* = 8.3 Hz, 1H), 7.40 (dd, *J* = 7.8, 1.5 Hz, 2H), 7.34 – 7.27 (m, 3H), 7.24 – 7.15 (m, 5H), 6.74 (d, *J* = 8.2 Hz, 2H), 6.03 (d, *J* = 8.5 Hz, 2H), 4.93 (s, 1H), 4.56 (s, 1H), 3.84 (s, 3H), 2.11 (s, 3H).

**<sup>13</sup>C NMR** (101 MHz, CDCl<sub>3</sub>) δ 161.1, 148.9, 148.5, 140.2, 136.8, 136.0, 132.8, 130.3, 129.9, 129.6, 129.6, 128.9, 128.5, 128.21, 128.19, 126.7, 124.7, 118.6, 115.4, 82.3, 64.7, 61.2, 20.3.

**IR** (KBr): 3410, 2939, 1728, 1617, 1530, 1519, 1343, 1309, 1063, 1003, 725, 705 cm<sup>-1</sup>;

**HRMS** (EI) *m/z* calcd for C<sub>17</sub>H<sub>24</sub>N<sub>3</sub>O<sub>4</sub> [M-C<sub>12</sub>H<sub>1</sub>]<sup>+</sup>: 334.1767; found:334.1723.

**MALDI-TOF-MS** *m/z* 480.10 ([M+H]<sup>+</sup>).

### 3-Benzhydryl-2-methoxy-6-methyl-3-(*p*-tolylamino)isoindolin-1-one (3h)

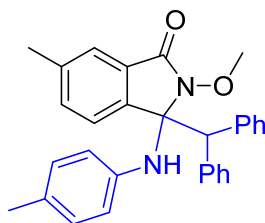

The reaction of **1n** (0.36 mmol), **2a** (0.3 mmol), [Cp\**Rh*Cl<sub>2</sub>]<sub>2</sub> (0.015 mmol), Cl<sub>3</sub>CCOOCs (0.09 mmol) and 4A MS (60 mg) in DCE (2 mL) following the typical procedure afforded **3h** (113 mg, 84 %) after chromatography on silica gel (petroleum ether/ethyl acetate 4:1) as a white solid; **m.p.** 172 – 174 °C.

**<sup>1</sup>H NMR** (400 MHz, CDCl<sub>3</sub>) δ 7.51 – 7.41 (m, 3H), 7.36 – 7.22 (m, 5H), 7.20 – 7.09 (m, 5H), 6.71 (d, *J* = 8.3 Hz, 2H), 6.04 (d, *J* = 8.3 Hz, 2H), 4.90 (s, 1H), 4.48 (s, 1H), 3.81 (s, 3H), 2.41 (s, 3H), 2.09 (s, 3H).

**<sup>13</sup>C NMR** (101 MHz, CDCl<sub>3</sub>) δ 163.8, 140.9, 139.6, 138.7, 137.9, 136.9, 132.8, 131.2, 130.3, 130.1, 129.3, 128.6, 128.5, 128.1, 127.7, 123.7, 123.5, 115.2, 81.9, 64.5, 61.0, 21.5, 20.3.

**IR** (film): 3418, 3030, 2939, 1714, 1615, 1519, 1494, 1451, 1301, 1084, 909, 810, 730, 707 cm<sup>-1</sup>;

**HRMS** (EI) *m/z* calcd for C<sub>30</sub>H<sub>28</sub>N<sub>2</sub>O<sub>2</sub> [M<sup>+</sup>]: 448.2151; found:448.2152.

### 3-Benzhydryl-7-fluoro-2-methoxy-3-(*p*-tolylamino)isoindolin-1-one(3i)

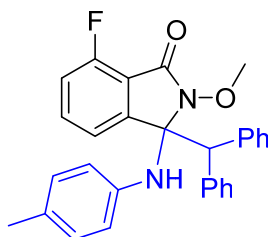

The reaction of **1o** (0.36 mmol), **2a** (0.3 mmol), [Cp\*RhCl<sub>2</sub>]<sub>2</sub> (0.015 mmol), Cl<sub>3</sub>CCOOCs (0.09 mmol) and 4A MS (60 mg) in DCE (2 mL) following the typical procedure afforded **3i** (39 mg, 29 %) after chromatography on silica gel (petroleum ether/ethyl acetate 4:1) as a white solid; **m.p.** 198-199°C.

**<sup>1</sup>H NMR** (400 MHz, CDCl<sub>3</sub>) δ 7.51 (td, *J* = 8.0, 4.7 Hz, 1H), 7.44 – 7.39 (m, 2H), 7.32 – 7.21 (m, 9H), 7.09 (t, *J* = 8.6 Hz, 1H), 6.74 (d, *J* = 8.2 Hz, 2H), 6.10 – 6.03 (m, 2H), 4.89 (s, 1H), 4.50 (s, 1H), 3.80 (s, 3H), 2.11 (s, 3H).

**<sup>13</sup>C NMR** (101 MHz, CDCl<sub>3</sub>) δ 160.51 (d, *J* = 1.0 Hz), 158.38 (d, *J* = 262.3 Hz), 144.75, 140.50, 137.26, 136.45, 133.82 (d, *J* = 7.6 Hz), 130.35, 129.97, 129.39, 128.88, 128.66, 128.32, 127.92 (d, *J* = 6.7 Hz), 119.54 (d, *J* = 3.9 Hz), 118.11 (d, *J* = 13.0 Hz), 116.92 (d, *J* = 19.5 Hz), 115.22, 81.55 (d, *J* = 1.6 Hz), 64.54, 61.30, 20.26.

**IR** (film): 3416, 3030, 2939, 1721, 1714, 1625, 1519, 1495, 1492, 1452, 1301, 1252, 1181, 1003, 884, 809, 729, 707 cm<sup>-1</sup>;

**HRMS** (EI) *m/z* calcd for C<sub>29</sub>H<sub>25</sub>N<sub>2</sub>O<sub>2</sub>F [M<sup>+</sup>]: 452.1900; found:452.1906.

### 3-Benzhydryl-2-methoxy-3-(phenylamino)isoindolin-1-one (3j)

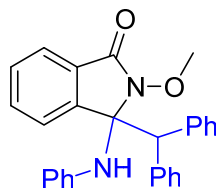

The reaction of **1a** (0.36 mmol), **2b** (0.3 mmol), [Cp\*RhCl<sub>2</sub>]<sub>2</sub> (0.015 mmol), Cl<sub>3</sub>CCOOCs (0.09 mmol) and 4A MS (60 mg) in DCE (2 mL) following the typical procedure afforded **3j** (97 mg, 77 %) after chromatography on silica gel (petroleum ether/ethyl acetate 4:1) as a white solid; **m.p.** 162 – 164 °C.

**<sup>1</sup>H NMR** (500 MHz, CDCl<sub>3</sub>) δ 7.66 (d, *J* = 7.4 Hz, 1H), 7.55 (td, *J* = 7.5, 1.0 Hz, 1H), 7.50 – 7.39 (m, 4H), 7.33 – 7.23 (m, 3H), 7.22 – 7.09 (m, 5H), 6.95 – 6.86 (m, 2H), 6.64 (t, *J* = 7.3 Hz, 1H), 6.13 (d, *J* = 7.8 Hz, 2H), 4.93 (s, 1H), 4.61 (s, 1H), 3.81 (s, 3H).

**<sup>13</sup>C NMR** (126 MHz, CDCl<sub>3</sub>) δ 163.5, 143.2, 141.7, 137.6, 136.7, 132.0, 131.1, 130.4, 130.0, 129.5, 128.8, 128.7, 128.2, 127.8, 123.5, 123.4, 119.4, 115.1, 81.7, 64.6, 61.1.

**IR** (film): 3416, 2938, 1712, 1602, 1497, 1466, 1312, 1072, 1003, 908, 750, 718, 706  $\text{cm}^{-1}$ ;

**HRMS** (EI)  $m/z$  calcd for  $\text{C}_{28}\text{H}_{24}\text{N}_2\text{O}_2$  [ $\text{M}^+$ ]: 420.1838; found: 420.1843.

### 3-Benzhydryl-3-((4-bromophenyl)amino)-2-methoxyisoindolin-1-one (**3k**)

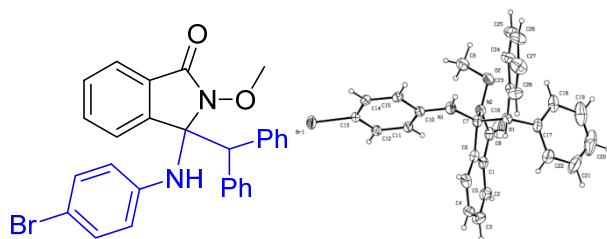

The reaction of **1a** (0.36 mmol), **2c** (0.3 mmol),  $[\text{Cp}^*\text{RhCl}_2]_2$  (0.015 mmol),  $\text{Cl}_3\text{CCOOCs}$  (0.09 mmol) and 4A MS (60 mg) in DCE (2 mL) following the typical procedure afforded **3k** (105 mg, 70 %) after chromatography on silica gel (petroleum ether/ethyl acetate 4:1) as a white solid; **m.p.** 192 – 195  $^\circ\text{C}$ .

**$^1\text{H}$  NMR** (500 MHz,  $\text{CDCl}_3$ )  $\delta$  7.66 (d,  $J = 7.4$  Hz, 1H), 7.56 (td,  $J = 7.5, 1.0$  Hz, 1H), 7.48 (td,  $J = 7.5, 0.7$  Hz, 1H), 7.43 (d,  $J = 7.1$  Hz, 2H), 7.40 (d,  $J = 7.6$  Hz, 1H), 7.33 – 7.25 (m, 3H), 7.21 – 7.08 (m, 5H), 7.00 (d,  $J = 8.9$  Hz, 2H), 6.01 (d,  $J = 9.0$  Hz, 2H), 4.92 (s, 1H), 4.64 (s, 1H), 3.82 (s, 3H).

**$^{13}\text{C}$  NMR** (126 MHz,  $\text{CDCl}_3$ )  $\delta$  163.5, 142.2, 141.2, 137.4, 136.4, 132.1, 131.6, 131.1, 130.3, 130.0, 129.7, 128.8, 128.2, 127.93, 127.90, 123.6, 123.5, 116.7, 111.5, 81.6, 64.6, 60.9.

**IR** (film): 3417, 2938, 1712, 1512, 1466, 1241, 1073, 1036, 1002, 908, 822, 732  $\text{cm}^{-1}$ ;

**HRMS** (EI)  $m/z$  calcd for  $\text{C}_{27}\text{H}_{19}\text{N}_2\text{OBr}$  [ $\text{M}-\text{CH}_4\text{O}$ ] $^+$ : 466.0681; found: 466.0680.

**MALDI-TOF-MS**  $m/z$  499.10 ( $[\text{M}+\text{H}]^+$ ).

### 3-Benzhydryl-2-methoxy-3-((4-methoxyphenyl)amino)isoindolin-1-one (**3l**)

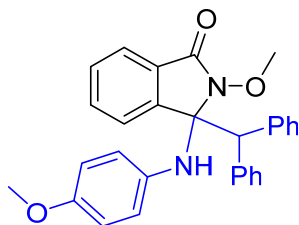

The reaction of **1a** (0.36 mmol), **2d** (0.3 mmol),  $[\text{Cp}^*\text{RhCl}_2]_2$  (0.015 mmol),  $\text{Cl}_3\text{CCOOCs}$  (0.09 mmol) and 4A MS (60 mg) in DCE (2 mL) following the typical procedure afforded **3l** (120 mg, 89 %) after chromatography on silica gel (petroleum ether/ethyl acetate 4:1) as a white solid; **m.p.** 142 – 144  $^\circ\text{C}$ .

**$^1\text{H}$  NMR** (500 MHz,  $\text{CDCl}_3$ )  $\delta$  7.64 (d,  $J = 7.4$  Hz, 1H), 7.57 – 7.50 (m, 1H), 7.47 – 7.37 (m, 4H), 7.32 – 7.21 (m, 3H), 7.20 – 7.08 (m, 5H), 6.48 (d,  $J = 9.0$  Hz, 2H), 6.11 (d,  $J = 9.0$  Hz, 2H), 4.91 (s, 1H), 4.40 (s, 1H), 3.81 (s, 3H), 3.60 (s, 3H).

**$^{13}\text{C}$  NMR** (126 MHz,  $\text{CDCl}_3$ )  $\delta$  163.6, 153.2, 141.9, 137.8, 137.0, 131.9, 131.1, 130.3, 130.1, 129.4, 128.6, 128.2, 127.71, 127.69, 123.7, 123.3, 116.9, 114.2, 82.4, 64.4, 61.1, 55.3.

**IR** (film): 3417, 2938, 1714, 1593, 1494, 1310, 1182, 1071, 1003, 908, 727  $\text{cm}^{-1}$ ;

**HRMS** (EI)  $m/z$  calcd for  $\text{C}_{29}\text{H}_{26}\text{N}_2\text{O}_3$  [ $\text{M}^+$ ]: 450.1943; found: 450.1940.

### 3-Benzhydryl-2-methoxy-3-(*m*-tolylamino)isoindolin-1-one (**3m**)



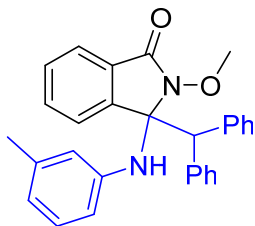

The reaction of **1a** (0.36 mmol), **2f** (0.3 mmol), [Cp\**RhCl*<sub>2</sub>]<sub>2</sub> (0.015 mmol), Cl<sub>3</sub>CCOOCs (0.09 mmol) and 4A MS (60 mg) in DCE (2 mL) following the typical procedure afforded **3m** (60 mg, 46 %) after chromatography on silica gel (petroleum ether/ethyl acetate 4:1) as a white solid; **m.p.** 185 – 187 °C.

<sup>1</sup>H NMR (400 MHz, Chloroform-*d*) δ 7.66 (d, *J* = 7.4 Hz, 1H), 7.55 (td, *J* = 7.5, 1.2 Hz, 1H), 7.47 (dd, *J* = 7.4, 1.1 Hz, 1H), 7.45 – 7.41 (m, 3H), 7.33 – 7.25 (m, 3H), 7.21 – 7.11 (m, 5H), 6.76 (t, *J* = 7.8 Hz, 1H), 6.46 (d, *J* = 7.5 Hz, 1H), 6.00 (s, 1H), 5.86 (dd, *J* = 8.1, 2.1 Hz, 1H), 4.92 (s, 1H), 4.56 (s, 1H), 3.82 (s, 3H), 2.05 (s, 3H).

<sup>13</sup>C NMR (101 MHz, Chloroform-*d*) δ 163.50, 143.17, 141.78, 138.62, 137.64, 136.72, 131.94, 130.37, 130.04, 129.42, 128.68, 128.64, 128.20, 127.79, 127.77, 123.56, 123.36, 120.24, 116.01, 111.97, 81.75, 64.61, 61.15, 21.38.

IR (film): 3417, 3030, 2938, 1720, 1714, 1607, 1519, 1493, 1467, 1451, 1314, 1176, 1134, 1074, 1002, 907, 772, 706 cm<sup>-1</sup>;

HRMS (EI) *m/z* calcd for C<sub>28</sub>H<sub>22</sub>N<sub>2</sub>O [M-CH<sub>4</sub>O]<sup>+</sup>: 402.1732; found: 402.1731.

MALDI-TOF-MS *m/z* 435.21 ([M+H]<sup>+</sup>);

### 3-(Bis(4-methoxyphenyl)methyl)-2-methoxy-3-(*p*-tolylamino)isoindolin-1-one (**3n**)

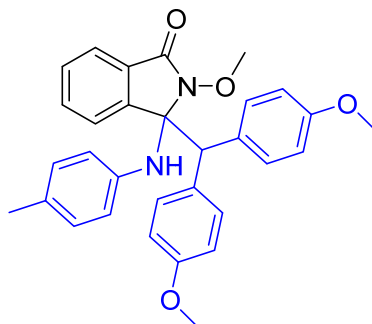

The reaction of **1a** (0.36 mmol), **2i** (0.3 mmol), [Cp\**RhCl*<sub>2</sub>]<sub>2</sub> (0.015 mmol), Cl<sub>3</sub>CCOOCs (0.09 mmol) and 4A MS (60 mg) in DCE (2 mL) following the typical procedure afforded **3n** (55 mg, 37 %) after chromatography on silica gel (petroleum ether/ethyl acetate 4:1) as a pale yellow solid; **m.p.** 103 – 105 °C.

<sup>1</sup>H NMR (400 MHz, CDCl<sub>3</sub>) δ 7.66 (d, *J* = 7.3 Hz, 1H), 7.53 (td, *J* = 7.5, 1.3 Hz, 1H), 7.44 (td, *J* = 7.5, 1.1 Hz, 1H), 7.40 (d, *J* = 7.5 Hz, 1H), 7.31 (d, *J* = 8.5 Hz, 2H), 7.05 (d, *J* = 7.7 Hz, 2H), 6.80 (d, *J* = 8.7 Hz, 2H), 6.71 (d, *J* = 8.4 Hz, 2H), 6.68 (d, *J* = 8.9 Hz, 2H), 6.05 (d, *J* = 8.5 Hz, 2H), 4.81 (s, 1H), 4.51 (s, 1H), 3.82 (s, 3H), 3.75 (s, 3H), 3.71 (s, 3H), 2.09 (s, 3H).

<sup>13</sup>C NMR (101 MHz, CDCl<sub>3</sub>) δ 163.5, 158.84, 158.79, 141.95, 140.85, 131.8, 131.3, 131.0, 130.9, 129.9, 129.3, 129.0, 128.4, 123.3, 115.1, 113.9, 113.4, 82.0, 64.5, 59.5, 55.1, 55.0, 20.2.

IR (film): 3412, 2999, 2936, 2838, 1722, 1713, 1609, 1514, 1464, 1303, 1250, 1180, 1034, 908, 813, 736 cm<sup>-1</sup>;

**HRMS** (EI)  $m/z$  calcd for  $C_{30}H_{26}N_2O_3$   $[M-CH_4O]^+$ : 462.1943; found: 462.1947.

**MALDI-TOF-MS**  $m/z$  495.23 ( $[M+H]^+$ );

### 3-(Bis(4-chlorophenyl)methyl)-2-methoxy-3-(*p*-tolylamino)isoindolin-1-one (3o)

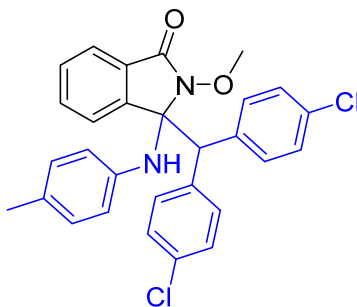

The reaction of **1a** (0.36 mmol), **2j** (0.3 mmol),  $[Cp^*RhCl_2]_2$  (0.015 mmol),  $Cl_3CCOOCs$  (0.09 mmol) and 4A MS (60 mg) in DCE (2 mL) following the typical procedure afforded **3o** (60 mg, 40 %) after chromatography on silica gel (petroleum ether/ethyl acetate 4:1) as a pale yellow oil.

**$^1H$  NMR** (400 MHz,  $CDCl_3$ )  $\delta$  7.68 (d,  $J = 7.4$  Hz, 1H), 7.56 (td,  $J = 7.5, 1.3$  Hz, 1H), 7.48 (td,  $J = 7.5, 1.1$  Hz, 1H), 7.41 (d,  $J = 7.5$  Hz, 1H), 7.30 (d,  $J = 8.5$  Hz, 2H), 7.25 (d,  $J = 8.8$  Hz, 2H), 7.15 (d,  $J = 8.5$  Hz, 2H), 7.09 (d,  $J = 8.1$  Hz, 2H), 6.73 (d,  $J = 8.3$  Hz, 2H), 6.05 (d,  $J = 8.5$  Hz, 2H), 4.87 (s, 1H), 4.39 (s, 1H), 3.80 (s, 3H), 2.10 (s, 3H).

**$^{13}C$  NMR** (101 MHz,  $CDCl_3$ )  $\delta$  163.4, 141.5, 140.4, 135.8, 135.0, 134.0, 133.9, 132.2, 131.6, 131.2, 130.8, 129.7, 129.4, 129.1, 128.8, 128.5, 123.7, 123.3, 115.4, 81.6, 64.6, 60.1, 20.3.

**IR** (film): 3419, 2939, 2920, 1722, 1713, 1616, 1519, 1493, 1467, 1301, 1093, 1073, 1014, 908, 810, 734, 695  $cm^{-1}$ ;

**HRMS** (EI)  $m/z$  calcd for  $C_{28}H_{20}N_2OCl_2$   $[M-CH_4O]^+$ : 470.0953; found: 470.0950.

**MALDI-TOF-MS**  $m/z$  503.13 ( $[M+H]^+$ );

### 3-Benzhydryl-2-methoxy-3-(*p*-tolylamino)-2,3-dihydro-1*H*-benzo[*f*]isoindol-1-one(3pa)

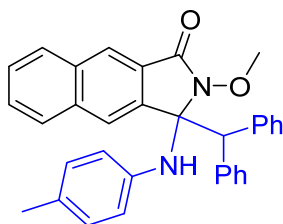

The reaction of **1b** (0.36 mmol), **2a** (0.3 mmol),  $[Cp^*RhCl_2]_2$  (0.015 mmol),  $Cl_3CCOOCs$  (0.09 mmol) and 4A MS (60 mg) in DCE (2 mL) following the typical procedure afforded **3pa + 3pb** after chromatography on silica gel (petroleum ether/ethyl acetate 5:1). **3pa** (45 mg, 31 %) was obtained as a white solid; **m.p.** 193 – 195 °C.

**$^1H$  NMR** (400 MHz,  $CDCl_3$ )  $\delta$  8.20 (s, 1H), 8.01 – 7.93 (m, 1H), 7.90 – 7.84 (m, 1H), 7.83 (s, 1H), 7.63 – 7.54 (m, 2H), 7.49 – 7.42 (m, 2H), 7.31 – 7.24 (m, 3H), 7.19 – 7.09 (m, 5H), 6.66 (d,  $J = 8.3$  Hz, 2H), 6.04 (d,  $J = 8.5$  Hz, 2H), 4.98 (s, 1H), 4.63 (s, 1H), 3.82 (s, 3H), 2.05 (s, 3H).

**$^{13}C$  NMR** (101 MHz,  $CDCl_3$ )  $\delta$  163.3, 140.6, 137.8, 136.9, 136.8, 134.8, 133.4, 130.3, 130.1, 129.6, 129.4, 128.7, 128.6, 128.5, 128.3, 128.2, 127.9, 127.76, 127.75, 127.0, 123.9, 123.1, 115.3, 81.9, 64.5, 61.5, 20.2

**IR** (film): 3417, 2925, 1712, 1615, 1519, 1452, 1347, 1302, 1067, 909, 733, 707, 646  $cm^{-1}$ ;

HRMS (EI)  $m/z$  calcd for  $C_{33}H_{28}N_2O_2$  [ $M^+$ ]: 484.2151; found:484.2151.

### 1-Benzhydryl-2-methoxy-1-(*p*-tolylamino)-1,2-dihydro-3H-benzo[*e*]isoindol-3-one(3pb)

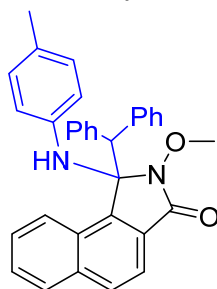

The reaction of **1b** (0.36 mmol), **2a** (0.3 mmol),  $[Cp^*RhCl_2]_2$  (0.015 mmol),  $Cl_3CCOOCs$  (0.09 mmol) and 4A MS (60 mg) in DCE (2 mL) following the typical procedure afforded **3pa** + **3pb** after chromatography on silica gel (petroleum ether/ethyl acetate 5:1). **3pb** (48 mg, 33 %) was obtained as a white solid; **m.p.** 111 – 112 °C.

$^1H$  NMR (400 MHz,  $CDCl_3$ )  $\delta$  8.56 (d,  $J = 7.7$  Hz, 1H), 7.98 – 7.93 (m, 1H), 7.89 (d,  $J = 8.3$  Hz, 1H), 7.80 (d,  $J = 7.3$  Hz, 2H), 7.64 – 7.52 (m, 3H), 7.43 (t,  $J = 7.3$  Hz, 2H), 7.40 – 7.33 (m, 1H), 7.04 (t,  $J = 7.3$  Hz, 1H), 6.96 (t,  $J = 7.5$  Hz, 2H), 6.79 (d,  $J = 7.4$  Hz, 2H), 6.64 (d,  $J = 8.3$  Hz, 2H), 6.08 (d,  $J = 8.5$  Hz, 2H), 5.08 (s, 1H), 4.79 (s, 1H), 3.78 (s, 3H), 2.03 (s, 3H).

$^{13}C$  NMR (101 MHz,  $CDCl_3$ )  $\delta$  163.6, 141.0, 139.4, 137.1, 136.3, 135.6, 131.5, 130.5, 129.6, 129.5, 129.4, 128.9, 128.8, 128.4, 128.0, 127.9, 127.67, 127.66, 127.5, 127.1, 123.5, 118.9, 115.1, 81.9, 64.5, 64.1, 20.2.

IR (film): 3413, 2925, 1714, 1615, 1519, 1495, 1452, 1301, 1034, 909, 807, 760, 732, 706  $cm^{-1}$ ;

HRMS (EI)  $m/z$  calcd for  $C_{33}H_{28}N_2O_2$  [ $M^+$ ]: 484.2151; found:484.2157.

## Synthetic procedure and Characterization data for 4

### Typical procedure for the preparation of

### 3-(Diphenylmethylene)-2-(*p*-tolyl)-2,3-dihydro-1H-benzo[*e*]isoindol-1-one (4a)

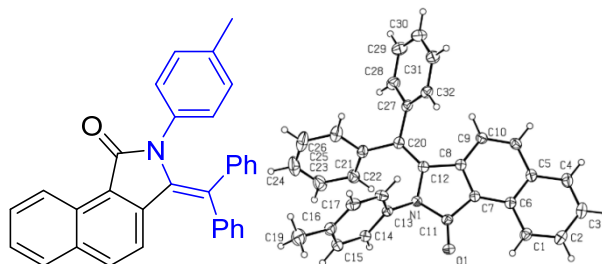

To an oven-dried Schlenk tube equipped with a magnetic stirring bar were added sequentially **1c** (0.36 mmol), **2a** (0.3 mmol),  $[Cp^*RhCl_2]_2$  (0.015 mmol),  $Cl_3CCOOCs$  (0.09 mmol), 4A MS (60 mg) and dry DCE (2 mL) under  $N_2$  atmosphere. The reaction vessel was heated to 80°C in oil bath for 10 hours. Upon completion, the reaction mixture was cooled to room temperature and then the solvent was evaporated in vacuum. The residue was purified by column chromatography on silica gel (petroleum ether/ethyl acetate 20:1) to give the product **4a** (97 mg, 74 %) as a yellow solid; **m.p.** 146 – 148 °C.

<sup>1</sup>H NMR (400 MHz, CDCl<sub>3</sub>) δ 9.23 (d, *J* = 8.3 Hz, 1H), 7.80 (d, *J* = 8.1 Hz, 1H), 7.68 – 7.61 (m, 2H), 7.56 – 7.51 (m, 1H), 7.50 – 7.39 (m, 5H), 7.00 (d, *J* = 8.3 Hz, 2H), 6.95 – 6.86 (m, 5H), 6.84 (d, *J* = 8.1 Hz, 2H), 6.54 (d, *J* = 8.8 Hz, 1H), 2.17 (s, 3H).

<sup>13</sup>C NMR (101 MHz, CDCl<sub>3</sub>) δ 169.2, 141.6, 139.9, 138.1, 135.8, 134.8, 134.1, 133.3, 132.0, 131.6, 131.1, 129.0, 128.9, 128.8, 128.7, 128.5, 128.3, 127.8, 127.6, 127.2, 127.1, 126.9, 124.5, 122.7, 120.8, 20.9.

IR (film): 3056, 1698, 1512, 1443, 1359, 1205, 1127, 1096, 825, 756, 701 cm<sup>-1</sup>;

HRMS (EI) *m/z* calcd for C<sub>32</sub>H<sub>23</sub>NO [M<sup>+</sup>]: 437.1780; found:437.1782.

### 3-(Diphenylmethylene)-2-(*m*-tolyl)-2,3-dihydro-1*H*-benzo[*e*]isoindol-1-one (4b)

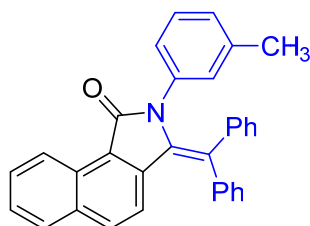

The reaction of **1c** (0.36 mmol), **2f** (0.3 mmol), [Cp\**Rh*Cl<sub>2</sub>]<sub>2</sub> (0.015 mmol), Cl<sub>3</sub>CCOOCs (0.09 mmol) and 4A MS (60 mg) in DCE (2 mL) following the typical procedure afforded **4b** (97 mg, 74 %) after chromatography on silica gel (petroleum ether/ethyl acetate 20:1) as a yellow solid; **m.p.** 149 – 150 °C.

<sup>1</sup>H NMR (400 MHz, CDCl<sub>3</sub>) δ 9.23 (d, *J* = 8.5 Hz, 1H), 7.79 (d, *J* = 8.1 Hz, 1H), 7.68 – 7.60 (m, 2H), 7.57 – 7.37 (m, 6H), 7.03 – 6.83 (m, 8H), 6.75 (d, *J* = 7.6 Hz, 1H), 6.55 (d, *J* = 8.8 Hz, 1H), 2.13 (s, 3H).

<sup>13</sup>C NMR (101 MHz, CDCl<sub>3</sub>) δ 169.1, 141.6, 140.0, 138.0, 137.5, 136.4, 134.6, 133.3, 132.1, 131.5, 130.8, 129.0, 128.9, 128.8, 128.7, 128.6, 128.3, 127.81, 127.75, 127.2, 127.0, 126.85, 126.84, 124.9, 124.5, 122.6, 120.8, 21.0.

IR (film): 3054, 1694, 1587, 1518, 1489, 1442, 1360, 1205, 1125, 909, 825, 755, 732, 702, 646 cm<sup>-1</sup>;

HRMS (EI) *m/z* calcd for C<sub>32</sub>H<sub>23</sub>NO [M<sup>+</sup>]: 437.1780; found:437.1787.

### 3-(Diphenylmethylene)-2-(4-methoxyphenyl)-2,3-dihydro-1*H*-benzo[*e*]isoindol-1-one (4c)

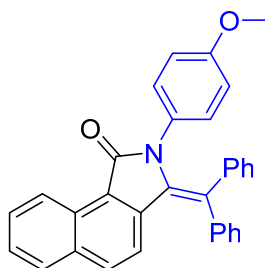

The reaction of **1c** (0.36 mmol), **2d** (0.3 mmol), [Cp\**Rh*Cl<sub>2</sub>]<sub>2</sub> (0.015 mmol), Cl<sub>3</sub>CCOOCs (0.09 mmol) and 4A MS (60 mg) in DCE (2 mL) following the typical procedure afforded **4c** (63 mg, 46 %) after chromatography on silica gel (petroleum ether/ethyl acetate 20:1) as a yellow solid; **m.p.** 136 – 138 °C.

<sup>1</sup>H NMR (400 MHz, CDCl<sub>3</sub>) δ 9.22 (d, *J* = 8.4 Hz, 1H), 7.80 (d, *J* = 8.1 Hz, 1H), 7.69 – 7.60 (m, 2H), 7.57 – 7.37 (m, 6H), 7.07 – 7.00 (m, 2H), 6.99 – 6.85 (m, 5H), 6.62 – 6.56 (m, 2H), 6.54 (d, *J* = 8.8 Hz, 1H), 3.69 (s, 3H).

<sup>13</sup>C NMR (101 MHz, CDCl<sub>3</sub>) δ 169.3, 157.6, 141.6, 139.9, 138.0, 134.9, 133.3, 132.0, 131.5, 131.0, 129.7, 129.0, 128.89, 128.86, 128.7, 128.3, 127.8, 127.2, 126.9, 124.5, 122.6, 120.8, 113.4, 55.4.

IR (film): 3045, 1694, 1510, 1442, 1293, 1246, 1207, 1129, 1031, 910, 826, 756, 732, 702, 622 cm<sup>-1</sup>;

HRMS (EI) *m/z* calcd for C<sub>32</sub>H<sub>23</sub>NO<sub>2</sub> [M<sup>+</sup>]: 453.1729; found:453.1732.

#### Ethyl 4-(3-(diphenylmethylene)-1-oxo-1,3-dihydro-2*H*-benzo[*e*]isoindol-2-yl)benzoate (**4d**)

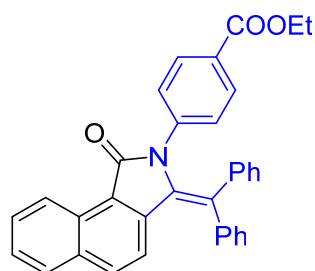

The reaction of **1c** (0.36 mmol), **2e** (0.3 mmol), [Cp\**Rh*Cl<sub>2</sub>]<sub>2</sub> (0.015 mmol), Cl<sub>3</sub>CCOOCs (0.09 mmol) and 4A MS (60 mg) in DCE (2 mL) following the typical procedure afforded **4d** (94 mg, 63 %) after chromatography on silica gel (petroleum ether/ethyl acetate 20:1) as a yellow solid; **m.p.** 91 – 93 °C.

<sup>1</sup>H NMR (400 MHz, CDCl<sub>3</sub>) δ 9.20 (d, *J* = 8.5 Hz, 1H), 7.81 (d, *J* = 8.1 Hz, 1H), 7.78 – 7.72 (m, 2H), 7.68 – 7.64 (m, 2H), 7.58 – 7.54 (m, 1H), 7.54 – 7.41 (m, 5H), 7.27 – 7.21 (m, 2H), 6.93 – 6.89 (m, 5H), 6.56 (d, *J* = 8.8 Hz, 1H), 4.32 (q, *J* = 7.1 Hz, 2H), 1.37 (t, *J* = 7.1 Hz, 3H).

<sup>13</sup>C NMR (101 MHz, CDCl<sub>3</sub>) δ 168.8, 166.1, 141.1, 140.9, 139.8, 138.3, 134.0, 133.4, 132.6, 131.5, 131.0, 129.5, 129.3, 129.0, 128.5, 127.9, 127.7, 127.6, 127.5, 127.2, 127.0, 124.4, 122.3, 120.6, 60.9, 14.3.

IR (film): 3056, 2981, 1703, 1604, 1517, 1443, 1358, 1273, 1192, 1106, 1019, 911, 825, 748, 701 cm<sup>-1</sup>;

HRMS (EI) *m/z* calcd for C<sub>34</sub>H<sub>25</sub>NO<sub>3</sub> [M<sup>+</sup>]: 495.1834; found:495.1833.

#### 3-(Diphenylmethylene)-2-(naphthalen-2-yl)-2,3-dihydro-1*H*-benzo[*e*]isoindol-1-one (**4e**)

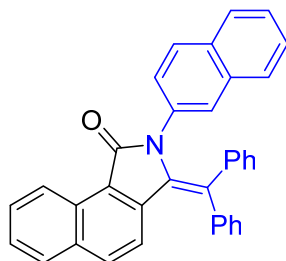

The reaction of **1c** (0.36 mmol), **2g** (0.3 mmol), [Cp\**Rh*Cl<sub>2</sub>]<sub>2</sub> (0.015 mmol), Cl<sub>3</sub>CCOOCs (0.09 mmol) and 4A MS (60 mg) in DCE (2 mL) following the typical procedure afforded **4e** (95 mg, 67 %) after chromatography on silica gel (petroleum ether/ethyl acetate 20:1) as a yellow solid; **m.p.** 211 – 212 °C.

**<sup>1</sup>H NMR** (400 MHz, CDCl<sub>3</sub>) δ 9.25 (d, *J* = 8.4 Hz, 1H), 7.81 (d, *J* = 8.2 Hz, 1H), 7.70 – 7.62 (m, 4H), 7.60 (d, *J* = 2.0 Hz, 1H), 7.54 (ddd, *J* = 8.1, 6.8, 1.2 Hz, 1H), 7.52 – 7.43 (m, 6H), 7.40 – 7.34 (m, 2H), 7.29 – 7.23 (m, 1H), 6.89 (d, *J* = 7.3 Hz, 2H), 6.70 (t, *J* = 7.7 Hz, 2H), 6.63 – 6.56 (m, 2H).

**<sup>13</sup>C NMR** (101 MHz, CDCl<sub>3</sub>) δ 169.2, 141.4, 139.8, 138.1, 134.7, 134.2, 133.4, 132.7, 132.3, 131.6, 131.5, 130.8, 129.2, 129.0, 128.9, 128.8, 128.3, 127.8, 127.7, 127.6, 127.3, 127.1, 127.0, 126.9, 126.7, 125.8, 125.7, 125.6, 124.5, 122.6, 120.8.

**IR** (film): 3054, 2924, 1698, 1597, 1517, 1469, 1442, 1367, 1266, 1207, 1117, 825, 754, 701 cm<sup>-1</sup>;

**HRMS** (EI) *m/z* calcd for C<sub>35</sub>H<sub>23</sub>NO [M<sup>+</sup>]: 473.1780; found: 473.1776.

### 3-(Bis(4-methoxyphenyl)methylene)-2-(*p*-tolyl)-2,3-dihydro-1*H*-benzo[*e*]isoindol-1-one (4f)

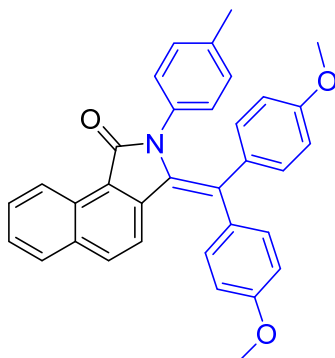

The reaction of **1c** (0.36 mmol), **2i** (0.3 mmol), [Cp\**Rh*Cl<sub>2</sub>]<sub>2</sub> (0.015 mmol), Cl<sub>3</sub>CCOOCs (0.09 mmol) and 4A MS (60 mg) in DCE (2 mL) following the typical procedure afforded **4f** (107 mg, 72 %) after chromatography on silica gel (petroleum ether/ethyl acetate 20:1) as a yellow solid; **m.p.** 181 – 184 °C.

**<sup>1</sup>H NMR** (400 MHz, CDCl<sub>3</sub>) δ 9.23 (d, *J* = 8.3 Hz, 1H), 7.80 (d, *J* = 8.1 Hz, 1H), 7.68 – 7.60 (m, 2H), 7.52 (ddd, *J* = 8.2, 6.9, 1.3 Hz, 1H), 7.35 – 7.29 (m, 2H), 7.03 – 6.95 (m, 4H), 6.86 (d, *J* = 8.1 Hz, 2H), 6.83 – 6.77 (m, 2H), 6.64 (d, *J* = 8.8 Hz, 1H), 6.49 – 6.38 (m, 2H), 3.92 (s, 3H), 3.68 (s, 3H), 2.19 (s, 3H).

**<sup>13</sup>C NMR** (101 MHz, CDCl<sub>3</sub>) δ 169.1, 160.2, 158.9, 138.3, 135.5, 134.2, 134.0, 133.3, 133.08, 133.06, 132.7, 132.6, 131.9, 129.1, 128.7, 128.5, 128.1, 127.7, 127.4, 126.6, 124.5, 122.2, 120.8, 114.2, 112.7, 55.4, 55.2, 20.9.

**IR** (film): 2929, 1693, 1602, 1511, 14621, 1359, 1302, 1249, 1173, 1031, 826, 761, 732 cm<sup>-1</sup>;

**HRMS** (EI) *m/z* calcd for C<sub>34</sub>H<sub>27</sub>NO<sub>3</sub> [M<sup>+</sup>]: 497.1991; found: 497.1993.

### 3-(Bis(4-chlorophenyl)methylene)-2-(*p*-tolyl)-2,3-dihydro-1*H*-benzo[*e*]isoindol-1-one (4g)

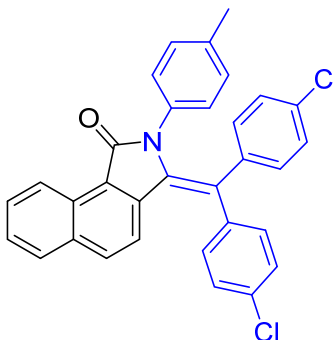

The reaction of **1c** (0.36 mmol), **2j** (0.3 mmol), [Cp\*RhCl<sub>2</sub>]<sub>2</sub> (0.015 mmol), Cl<sub>3</sub>CCOOCs (0.09 mmol) and 4A MS (60 mg) in DCE (2 mL) following the typical procedure afforded **4g** (91 mg, 60 %) after chromatography on silica gel (petroleum ether/ethyl acetate 20:1) as a yellow solid; **m.p.** 199 – 200 °C.

<sup>1</sup>H NMR (400 MHz, CDCl<sub>3</sub>) δ 9.25 – 9.15 (m, 1H), 7.82 (d, *J* = 8.1 Hz, 1H), 7.70 (d, *J* = 8.8 Hz, 1H), 7.66 (ddd, *J* = 8.3, 6.9, 1.3 Hz, 1H), 7.55 (ddd, *J* = 8.2, 6.9, 1.3 Hz, 1H), 7.48 – 7.41 (m, 2H), 7.37 – 7.30 (m, 2H), 6.99 – 6.92 (m, 2H), 6.92 – 6.85 (m, 4H), 6.79 – 6.72 (m, 2H), 6.63 (d, *J* = 8.8 Hz, 1H), 2.23 (s, 3H).

<sup>13</sup>C NMR (101 MHz, CDCl<sub>3</sub>) δ 168.9, 139.6, 138.0, 137.5, 136.5, 135.5, 135.0, 133.7, 133.4, 133.3, 132.9, 132.3, 132.1, 129.3, 128.9, 128.8, 128.5, 127.9, 127.6, 127.4, 127.1, 125.3, 124.5, 122.8, 120.5, 20.9.

IR (film): 2922, 1703, 1694, 1587, 1514, 1487, 1399, 1361, 1206, 1128, 1090, 1015, 908, 824, 756, 732 cm<sup>-1</sup>;

HRMS (EI) *m/z* calcd for C<sub>32</sub>H<sub>21</sub>NOCl<sub>2</sub> [M<sup>+</sup>]: 505.1000; found: 505.1000.

### 3-(Di([1,1'-biphenyl]-4-yl)methylene)-2-(*p*-tolyl)-2,3-dihydro-1*H*-benzo[*e*]isoindol-1-one (**4h**)

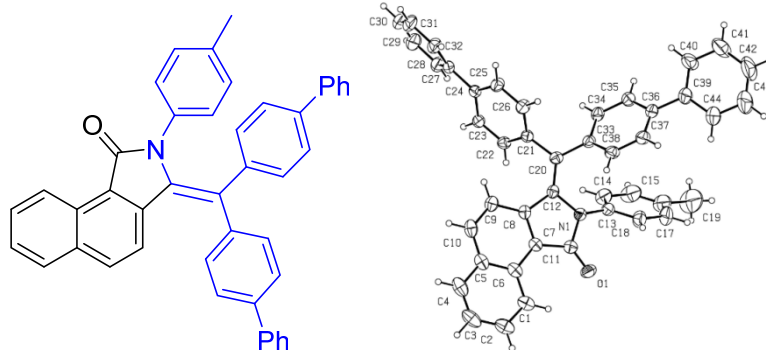

The reaction of **1c** (0.36 mmol), **2m** (0.3 mmol), [Cp\*RhCl<sub>2</sub>]<sub>2</sub> (0.015 mmol), Cl<sub>3</sub>CCOOCs (0.09 mmol) and 4A MS (60 mg) in DCE (2 mL) following the typical procedure afforded **4h** (164 mg, 93 %) after chromatography on silica gel (petroleum ether/ethyl acetate 20:1) as a yellow solid; **m.p.** 214 – 216 °C.

<sup>1</sup>H NMR (400 MHz, CDCl<sub>3</sub>) δ 9.25 (d, *J* = 8.1 Hz, 1H), 7.80 (d, *J* = 8.1 Hz, 1H), 7.77 – 7.70 (m, 4H), 7.65 (td, *J* = 8.6, 2.3 Hz, 2H), 7.56 – 7.47 (m, 5H), 7.45 – 7.37 (m, 5H), 7.36 – 7.29 (m, 1H), 7.12 (d, *J* = 8.3 Hz, 2H), 7.02 (d, *J* = 8.3 Hz, 2H), 6.96 (d, *J* = 8.3 Hz, 2H), 6.85 (d, *J* = 8.1 Hz, 2H), 6.76 (d, *J* = 8.8 Hz, 1H), 2.10 (s, 3H).

<sup>13</sup>C NMR (101 MHz, CDCl<sub>3</sub>) δ 169.1, 141.4, 140.8, 140.4, 140.2, 138.8, 138.0, 135.9, 134.9, 134.0, 133.3, 132.2, 132.1, 131.5, 129.0, 128.9, 128.7, 128.6, 128.3, 127.83, 127.80, 127.74, 127.70, 127.4, 127.3, 127.0, 126.92, 126.87, 126.0, 124.5, 122.6, 120.9, 20.9.

IR (film): 3028, 2920, 1694, 1512, 1486, 1361, 1192, 1128, 1095, 825, 766, 740, 619 cm<sup>-1</sup>;

HRMS (EI) *m/z* calcd for C<sub>44</sub>H<sub>31</sub>NO [M<sup>+</sup>]: 589.2406; found: 589.2411.

### 3-(Bis(3,4-dimethoxyphenyl)methylene)-2-(*p*-tolyl)-2,3-dihydro-1*H*-benzo[*e*]isoindol-1-one (**4i**)

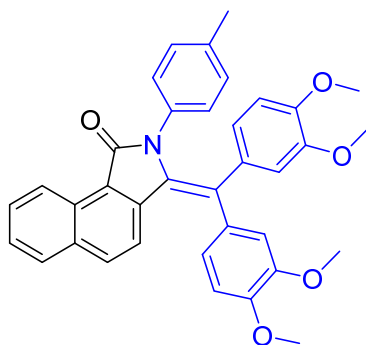

The reaction of **1c** (0.36 mmol), **2k** (0.3 mmol), [Cp\*RhCl<sub>2</sub>]<sub>2</sub> (0.015 mmol), Cl<sub>3</sub>CCOOCs (0.09 mmol) and 4A MS (60 mg) in DCE (2 mL) following the typical procedure afforded **4i** (117 mg, 70 %) after chromatography on silica gel (petroleum ether/ethyl acetate 20:1) as a yellow solid; **m.p.** 180 – 183 °C.

<sup>1</sup>H NMR (400 MHz, CDCl<sub>3</sub>) δ 9.23 (d, *J* = 8.4 Hz, 1H), 7.82 (d, *J* = 8.1 Hz, 1H), 7.69 – 7.62 (m, 2H), 7.53 (ddd, *J* = 8.1, 7.0, 1.2 Hz, 1H), 7.03 (d, *J* = 7.4 Hz, 3H), 6.95 (d, *J* = 8.2 Hz, 1H), 6.88 (d, *J* = 7.9 Hz, 3H), 6.67 (d, *J* = 8.8 Hz, 1H), 6.46 (s, 3H), 4.00 (s, 3H), 3.81 (s, 3H), 3.76 (s, 3H), 3.69 (s, 3H), 2.19 (s, 3H).

<sup>13</sup>C NMR (101 MHz, CDCl<sub>3</sub>) δ 169.09, 149.79, 149.07, 148.53, 147.31, 138.28, 135.59, 134.22, 133.96, 133.48, 133.15, 132.92, 131.94, 129.08, 128.93, 128.41, 128.21, 127.77, 127.09, 126.68, 124.80, 124.66, 124.42, 122.28, 120.88, 114.42, 111.03, 110.19, 56.03, 55.95, 55.87, 55.54, 20.89.

IR (film): 2930, 1694, 1597, 1512, 1463, 1409, 1325, 1253, 1168, 1139, 1026, 826 cm<sup>-1</sup>;

HRMS (EI) *m/z* calcd for C<sub>36</sub>H<sub>31</sub>NO<sub>5</sub> [M<sup>+</sup>]: 557.2202; found: 557.2205.

### 3-(Bis(4-(tert-butyl)phenyl)methylene)-2-(*p*-tolyl)-2,3-dihydro-1*H*-benzo[*e*]isoindol-1-one(**4j**)

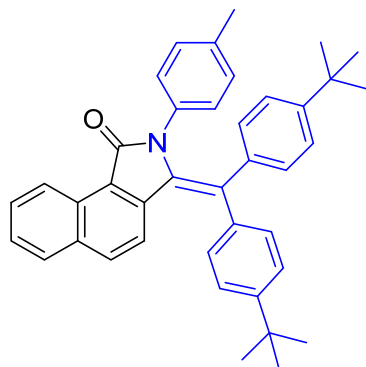

The reaction of **1c** (0.36 mmol), **2l** (0.3 mmol), [Cp\*RhCl<sub>2</sub>]<sub>2</sub> (0.015 mmol), Cl<sub>3</sub>CCOOCs (0.09 mmol) and 4A MS (60 mg) in DCE (2 mL) following the typical procedure afforded **4j** (119 mg, 72 %) after chromatography on silica gel (petroleum ether/ethyl acetate 20:1) as a yellow solid; **m.p.** 258 – 261 °C.

<sup>1</sup>H NMR (400 MHz, CDCl<sub>3</sub>) δ 9.23 (d, *J* = 8.5 Hz, 1H), 7.79 (d, *J* = 8.1 Hz, 1H), 7.67 – 7.60 (m, 2H), 7.52 (ddd, *J* = 8.2, 6.9, 1.3 Hz, 1H), 7.48 – 7.42 (m, 2H), 7.37 – 7.31 (m, 2H), 6.99 – 6.93 (m, 2H), 6.92 – 6.87 (m, 2H), 6.84 – 6.77 (m, 4H), 6.57 (d, *J* = 8.8 Hz, 1H), 2.15 (s, 3H), 1.41 (s, 9H), 1.17 (s, 9H).



$^{13}\text{C}$  NMR (101 MHz,  $\text{CDCl}_3$ )  $\delta$  169.1 , 152.0 , 150.2 , 138.5 , 138.2 , 137.1 , 135.3 , 134.23 , 134.19 , 133.2 , 131.8 , 131.2 , 130.8 , 129.2 , 129.1 , 128.4 , 128.1 , 127.7 , 126.7 , 125.6 , 124.5 , 124.0 , 122.5 , 120.9 , 34.8 , 34.4 , 31.4 , 31.1 , 20.9 .

IR (film): 2961, 2867, 1698, 1513, 1361, 1267, 1213, 1192, 1129, 1111, 1019, 825, 777, 756  $\text{cm}^{-1}$ ;

HRMS (EI)  $m/z$  calcd for  $\text{C}_{40}\text{H}_{39}\text{NO}$  [ $\text{M}^+$ ]: 549.3032; found: 549.3040.

### 5-Bromo-3-(diphenylmethylene)-2-(*p*-tolyl)-2,3-dihydro-1*H*-benzo[*e*]isoindol-1-one(4k)

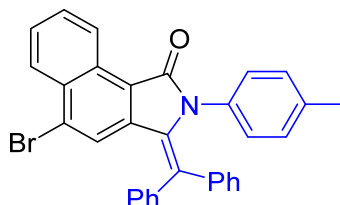

The reaction of **1p** (0.36 mmol), **2a** (0.3 mmol),  $[\text{Cp}^*\text{RhCl}_2]_2$  (0.015 mmol),  $\text{Cl}_3\text{CCOOCs}$  (0.09 mmol) and 4A MS (60 mg) in DCE (2 mL) following the typical procedure afforded **4k** (76 mg, 49 %) after chromatography on silica gel (petroleum ether/ethyl acetate 20:1) as a yellow solid; **m.p.** 234 – 235  $^\circ\text{C}$ .

$^1\text{H}$  NMR (400 MHz,  $\text{CDCl}_3$ )  $\delta$  9.27 (d,  $J$  = 7.8 Hz, 1H), 8.20 (d,  $J$  = 8.2 Hz, 1H), 7.68 (ddd,  $J$  = 8.3, 6.9, 1.4 Hz, 1H), 7.62 (ddd,  $J$  = 8.3, 6.9, 1.5 Hz, 1H), 7.58 – 7.46 (m, 3H), 7.40 (dt,  $J$  = 6.8, 1.5 Hz, 2H), 7.03 – 6.96 (m, 2H), 6.96 – 6.82 (m, 7H), 6.78 (s, 1H), 2.17 (s, 3H).

$^{13}\text{C}$  NMR (101 MHz,  $\text{CDCl}_3$ )  $\delta$  168.5 , 141.0 , 139.5 , 138.0 , 136.0 , 133.8 , 133.65 , 131.61 , 131.5 , 131.0 , 129.7 , 129.6 , 129.1 , 128.98 , 128.96 , 128.6 , 128.0 , 127.5 , 127.4 , 127.33 , 127.30 , 127.2 , 125.3 , 124.9 , 122.1 , 20.9 .

IR (film): 3056, 2924, 2854, 1703, 1698, 1513, 1443, 1367, 1208, 1129, 910, 764, 733, 701  $\text{cm}^{-1}$ ;

HRMS (EI)  $m/z$  calcd for  $\text{C}_{32}\text{H}_{22}\text{NOBr}$  [ $\text{M}^+$ ]: 515.0885; found:515.0884.

### 3-(Diphenylmethylene)-5-ethoxy-2-(*p*-tolyl)-2,3-dihydro-1*H*-benzo[*e*]isoindol-1-one(4l)

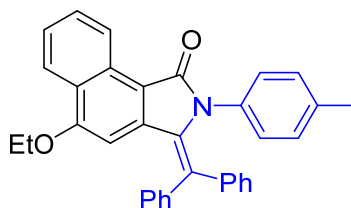

The reaction of **1q** (0.36 mmol), **2a** (0.3 mmol),  $[\text{Cp}^*\text{RhCl}_2]_2$  (0.015 mmol),  $\text{Cl}_3\text{CCOOCs}$  (0.09 mmol) and 4A MS (60 mg) in DCE (2 mL) following the typical procedure afforded **4l** (66 mg, 46 %) after chromatography on silica gel (petroleum ether/ethyl acetate 20:1) as a yellow solid; **m.p.** 262 – 263  $^\circ\text{C}$ .

$^1\text{H}$  NMR (400 MHz,  $\text{CDCl}_3$ )  $\delta$  9.14 (d,  $J$  = 8.3 Hz, 1H), 8.20 (d,  $J$  = 8.3 Hz, 1H), 7.63 (ddd,  $J$  = 8.3, 6.8, 1.3 Hz, 1H), 7.53 – 7.41 (m, 6H), 7.03 – 6.98 (m, 2H), 6.95 – 6.87 (m, 5H), 6.83 (d,  $J$  = 8.0 Hz, 2H), 5.86 (s, 1H), 3.64 (q,  $J$  = 7.0 Hz, 2H), 2.16 (s, 3H), 1.34 (t,  $J$  = 7.0 Hz, 3H).

$^{13}\text{C}$  NMR (101 MHz,  $\text{CDCl}_3$ )  $\delta$  169.2 , 157.6 , 141.8 , 139.8 , 139.7 , 135.5 , 135.2 , 134.3 , 131.6 , 130.9 , 129.8 , 128.9 , 128.6 , 128.45 , 128.39 , 127.8 , 127.4 , 127.1 , 126.9 , 126.1 , 125.8 , 124.3 , 122.2 , 115.5 , 99.8 , 63.2 , 20.9 , 14.6 .

**IR** (ATR): 3058, 1697, 1579, 1512, 1360, 1280, 1209, 1176, 1136, 1097, 1025, 827, 772, 755, 698, 623  $\text{cm}^{-1}$ ;

**HRMS** (EI)  $m/z$  calcd for  $\text{C}_{34}\text{H}_{27}\text{NO}_2$  [ $\text{M}^+$ ]: 481.2042; found: 481.2043.

### 7-Chloro-3-(diphenylmethylene)-2-(*p*-tolyl)isoindolin-1-one(**4m**)

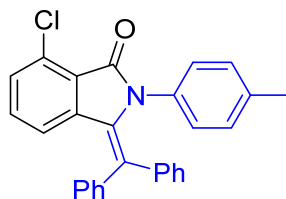

The reaction of **1d** (0.36 mmol), **2a** (0.3 mmol),  $[\text{Cp}^*\text{RhCl}_2]_2$  (0.015 mmol),  $\text{Cl}_3\text{CCOOCs}$  (0.09 mmol) and 4A MS (60 mg) in DCE (2 mL) following the typical procedure afforded **4m** (77 mg, 61 %) after chromatography on silica gel (petroleum ether/ethyl acetate 20:1) as a yellow solid; **m.p.** 156 – 158  $^\circ\text{C}$ .

**$^1\text{H}$  NMR** (500 MHz,  $\text{CDCl}_3$ )  $\delta$  7.49 – 7.40 (m, 3H), 7.35 (dd,  $J = 7.8, 1.5$  Hz, 2H), 7.33 (d,  $J = 8.0$  Hz, 1H), 7.12 (t,  $J = 8.0$  Hz, 1H), 6.94 (d,  $J = 8.2$  Hz, 2H), 6.92 – 6.84 (m, 3H), 6.81 (d,  $J = 8.2$  Hz, 4H), 6.37 (d,  $J = 8.0$  Hz, 1H), 2.15 (s, 3H).

**$^{13}\text{C}$  NMR** (126 MHz,  $\text{CDCl}_3$ )  $\delta$  165.8, 141.4, 140.5, 139.6, 136.0, 133.6, 132.7, 132.2, 131.6, 131.0, 130.7, 130.1, 129.0, 128.7, 128.5, 128.0, 127.4, 127.2, 127.0, 124.8, 122.1, 20.9.

**IR** (film): 3056, 2923, 1714, 1596, 1512, 1463, 1360, 1330, 1261, 1229, 1099, 803, 756, 695, 669, 648  $\text{cm}^{-1}$ ;

**HRMS** (EI)  $m/z$  calcd for  $\text{C}_{28}\text{H}_{20}\text{NOCl}$  [ $\text{M}^+$ ]: 421.1233; found: 421.1230.

### 3-(Diphenylmethylene)-7-methyl-2-(*p*-tolyl)isoindolin-1-one(**4n**)

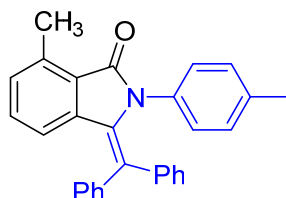

The reaction of **1e** (0.36 mmol), **2a** (0.3 mmol),  $[\text{Cp}^*\text{RhCl}_2]_2$  (0.015 mmol),  $\text{Cl}_3\text{CCOOCs}$  (0.09 mmol) and 4A MS (60 mg) in DCE (2 mL) following the typical procedure afforded **4n** (54 mg, 45 %) after chromatography on silica gel (petroleum ether/ethyl acetate 20:1) as a yellow solid; **m.p.** 175 – 176  $^\circ\text{C}$ .

**$^1\text{H}$  NMR** (400 MHz,  $\text{CDCl}_3$ )  $\delta$  7.45 – 7.39 (m, 3H), 7.38 – 7.33 (m, 2H), 7.14 (d,  $J = 7.4$  Hz, 1H), 7.09 (t,  $J = 7.6$  Hz, 1H), 6.94 (d,  $J = 8.3$  Hz, 2H), 6.90 – 6.84 (m, 3H), 6.84 – 6.77 (m, 4H), 6.31 (d,  $J = 7.7$  Hz, 1H), 2.74 (s, 3H), 2.15 (s, 3H).

**$^{13}\text{C}$  NMR** (101 MHz,  $\text{CDCl}_3$ )  $\delta$  169.0, 141.8, 140.0, 138.7, 137.7, 135.7, 134.03, 133.99, 131.3, 131.1, 130.65, 130.63, 128.9, 128.4, 128.3, 127.4, 127.1, 126.6, 126.4, 126.1, 121.2, 20.9, 17.8.

**IR** (film): 3055, 2923, 1704, 1601, 1513, 1444, 1361, 1332, 1219, 1115, 696, 668, 652  $\text{cm}^{-1}$ ;

**HRMS** (EI)  $m/z$  calcd for  $\text{C}_{29}\text{H}_{23}\text{NO}$  [ $\text{M}^+$ ]: 401.1780; found: 401.1784.

### 3-(diphenylmethylene)-7-phenyl-2-(*p*-tolyl)isoindolin-1-one (**4o**)

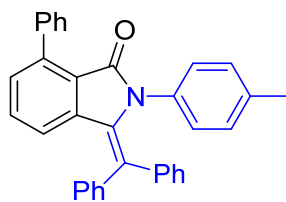

The reaction of **1f** (0.36 mmol), **2a** (0.3 mmol), [Cp\**RhCl*<sub>2</sub>]<sub>2</sub> (0.015 mmol), Cl<sub>3</sub>CCOOCs (0.09 mmol) and 4A MS (60 mg) in DCE (2 mL) following the typical procedure afforded **4n** (33 mg, 24 %) after chromatography on silica gel (petroleum ether/ethyl acetate 20:1) as a yellow solid; **m.p.** 191 – 193 °C.

<sup>1</sup>H NMR (400 MHz, Chloroform-*d*) δ 7.58 – 7.53 (m, 2H), 7.49 – 7.35 (m, 8H), 7.32 (dd, *J* = 7.5, 1.1 Hz, 1H), 7.25 (t, *J* = 3.8 Hz, 1H), 6.94 – 6.90 (m, 2H), 6.90 – 6.81 (m, 5H), 6.76 (d, *J* = 8.1 Hz, 2H), 6.52 (dd, *J* = 7.8, 1.2 Hz, 1H), 2.12 (s, 3H).

<sup>13</sup>C NMR (101 MHz, Chloroform-*d*) δ 167.4, 141.9, 140.9, 140.0, 139.2, 137.5, 135.7, 133.9, 133.7, 131.3, 131.2, 130.8, 130.7, 129.8, 129.0, 128.5, 128.4, 127.7, 127.53, 127.48, 127.1, 126.78, 126.76, 124.7, 122.7, 20.8.

IR (film): 3057, 3029, 2924, 1711, 1597, 1513, 1474, 1444, 1360, 1259, 1223, 1118, 759, 697 cm<sup>-1</sup>;

HRMS (EI) *m/z* calcd for C<sub>29</sub>H<sub>23</sub>NO [M<sup>+</sup>]: 463.1936; found: 463.1931.

### 3-(Diphenylmethylene)-2-(p-tolyl)-2,3,6,7,8,9-hexahydro-1H-benzo[e]isoindol-1-one(**4p**)

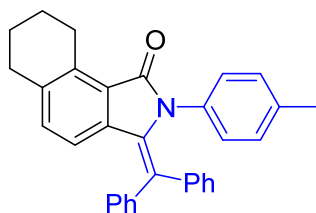

The reaction of **1g** (0.36 mmol), **2a** (0.3 mmol), [Cp\**RhCl*<sub>2</sub>]<sub>2</sub> (0.015 mmol), Cl<sub>3</sub>CCOOCs (0.09 mmol) and 4A MS (60 mg) in DCE (2 mL) following the typical procedure afforded **4n** (61 mg, 46 %) after chromatography on silica gel (petroleum ether/ethyl acetate 20:1) as a pale yellow solid; **m.p.** 157 – 158 °C.

<sup>1</sup>H NMR (400 MHz, CDCl<sub>3</sub>) δ 7.44 – 7.39 (m, 3H), 7.38 – 7.33 (m, 2H), 6.96 – 6.90 (m, 3H), 6.89 – 6.83 (m, 3H), 6.83 – 6.77 (m, 4H), 6.19 (d, *J* = 8.2 Hz, 1H), 3.32 (t, *J* = 5.6 Hz, 2H), 2.76 (t, *J* = 5.5 Hz, 2H), 2.15 (s, 3H), 1.86 – 1.74 (m, 4H).

<sup>13</sup>C NMR (101 MHz, CDCl<sub>3</sub>) δ 169.1, 141.9, 140.1, 138.5, 136.7, 136.6, 135.6, 134.14, 134.10, 132.7, 131.1, 130.7, 128.8, 128.4, 128.2, 127.4, 127.1, 126.5, 125.7, 125.5, 120.6, 29.6, 25.3, 22.6, 22.5, 20.9.

IR (film): 3028, 2927, 2857, 1704, 1698, 1513, 1486, 1444, 1360, 1203, 1135, 1100, 909, 756, 697, 652 cm<sup>-1</sup>;

HRMS (EI) *m/z* calcd for C<sub>32</sub>H<sub>27</sub>NO [M<sup>+</sup>]: 441.2093; found: 441.2096.

## Synthetic procedure and Characterization data for 5 and 6

**Typical procedure for the preparation of 3-(Diphenylmethylene)-2-methoxyisoindolin-1-one (5a):**

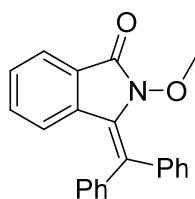

To a 25 ml pressure tube charged with a magnetic stir bar was added **3a** (0.1 mmol),  $\text{BF}_3 \cdot \text{OEt}_2$  (0.3 mmol), and 1.5 mL acetone as solvent. The reaction vessel was sealed and heated to 80 °C in an oil bath for a period of 3 hours. Then the solvent was removed under reduce pressure, and the residue was subject to silica gel column chromatography with ethyl acetate/petroleum ether = 10:1 (v:v) as eluent. The product **5a** was obtained as a white solid (27 mg, 83%), **m.p.** 170 – 171 °C.

**$^1\text{H NMR}$**  (400 MHz,  $\text{CDCl}_3$ )  $\delta$  7.84 (d,  $J$  = 7.6 Hz, 1H), 7.46 – 7.20 (m, 12H), 6.46 (d,  $J$  = 8.0 Hz, 1H), 3.44 (s, 3H).

**$^{13}\text{C NMR}$**  (101 MHz,  $\text{CDCl}_3$ )  $\delta$  163.3 , 140.5 , 139.5 , 134.0 , 131.9 , 130.6 , 130.3 , 128.9 , 128.7 , 128.5 , 128.3 , 127.7 , 127.3 , 127.0 , 126.1 , 123.6 , 123.1 , 62.6 .

**IR** (ATR): 3566, 1713, 1442, 1305, 1267, 1189, 1114, 1032, 997, 951, 911, 756, 698, 638  $\text{cm}^{-1}$ ;

**HRMS** (EI)  $m/z$  calcd for  $\text{C}_{22}\text{H}_{17}\text{NO}_2$  [ $\text{M}^+$ ]: 327.1259; found:327.1263.

#### Preparation of 3-(Diphenylmethylene)-2-methoxy-6-methylisoindolin-1-one (**5b**):

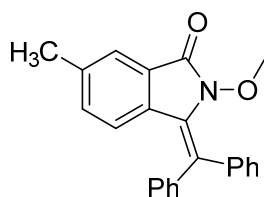

The reaction of **3h** (0.1 mmol),  $\text{BF}_3 \cdot \text{OEt}_2$  (0.3 mmol), and acetone (1.5mL) following the typical procedure afforded **5b** (26 mg, 76 %) after chromatography on silica gel (petroleum ether/ethyl acetate 10:1) as a white solid, **m.p.** 166 – 168 °C.

**$^1\text{H NMR}$**  (400 MHz,  $\text{CDCl}_3$ )  $\delta$  7.64 (s, 1H), 7.44 – 7.38 (m, 3H), 7.37 – 7.27 (m, 7H), 7.08 – 7.02 (m, 1H), 6.33 (d,  $J$  = 8.1 Hz, 1H), 3.43 (s, 3H), 2.38 (s, 3H).

**$^{13}\text{C NMR}$**  (101 MHz,  $\text{CDCl}_3$ )  $\delta$  163.6 , 140.7 , 139.5 , 139.1 , 133.0 , 131.5 , 130.6 , 130.4 , 128.9 , 128.5 , 128.4 , 127.6 , 127.3 , 127.1 , 125.2 , 123.5 , 123.3 , 62.6 , 21.4 .

**IR** (ATR): 3055, 1710, 1488, 1443, 1320, 1264, 1194, 1128, 1017, 827, 753, 699, 651, 631  $\text{cm}^{-1}$ ;

**HRMS** (EI)  $m/z$  calcd for  $\text{C}_{23}\text{H}_{19}\text{NO}_2$  [ $\text{M}^+$ ]: 341.1416; found: 341.1414.

#### Preparation of 5-Chloro-3-(diphenylmethylene)-2-methoxyisoindolin-1-one (**5c**):

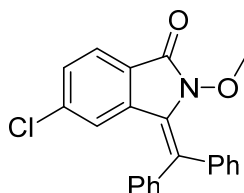

The reaction of **3d** (0.1 mmol),  $\text{BF}_3 \cdot \text{OEt}_2$  (0.3 mmol), and acetone (1.5mL) following the typical procedure afforded **5c** (31 mg, 86 %) after chromatography on silica gel (petroleum ether/ethyl acetate 10:1) as a white solid, **m.p.** 215 – 217 °C.

**$^1\text{H NMR}$**  (500 MHz,  $\text{CDCl}_3$ )  $\delta$  7.76 (d,  $J$  = 8.1 Hz, 1H), 7.51 – 7.43 (m, 3H), 7.37 – 7.28 (m, 8H), 6.35 (d,  $J$  = 1.7 Hz, 1H), 3.44 (s, 3H).

<sup>13</sup>C NMR (126 MHz, CDCl<sub>3</sub>) δ 162.5 , 139.9 , 139.0 , 138.2 , 135.4 , 130.5 , 130.3 , 129.1 , 129.03 , 128.98 , 128.0 , 127.5 , 127.4 , 125.3 , 124.3 , 123.9 , 62.8 .

IR (ATR): 3077, 1718, 1607, 1451, 1424, 1317, 1273, 1186, 1121, 1075, 1014, 958, 761, 696 cm<sup>-1</sup>;

HRMS (EI) m/z calcd for C<sub>22</sub>H<sub>16</sub>NO<sub>2</sub>Cl [M<sup>+</sup>]: 361.0870; found: 361.0866.

#### Preparation of 3-(Diphenylmethylene)-2,5-dimethoxyisoindolin-1-one (5d):

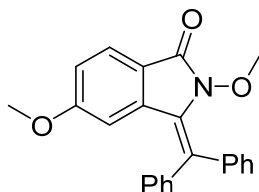

The reaction of **3c** (0.1 mmol), BF<sub>3</sub>·OEt<sub>2</sub> (0.3 mmol), and acetone (1.5mL) following the typical procedure afforded **5d** (29 mg, 81 %) after chromatography on silica gel (petroleum ether/ethyl acetate 10:1) as a white solid, **m.p.** 194 – 196 °C.

<sup>1</sup>H NMR (500 MHz, CDCl<sub>3</sub>) δ 7.73 (d, *J* = 8.4 Hz, 1H), 7.47 – 7.42 (m, 3H), 7.39 – 7.36 (m, 2H), 7.33 – 7.27 (m, 5H), 6.89 (dd, *J* = 8.4, 2.3 Hz, 1H), 5.88 (d, *J* = 2.2 Hz, 1H), 3.45 (s, 3H), 3.43 (s, 3H).

<sup>13</sup>C NMR (126 MHz, CDCl<sub>3</sub>) δ 163.8 , 162.8 , 140.6 , 139.4 , 136.3 , 130.6 , 130.3 , 129.0 , 128.8 , 128.5 , 127.7 , 127.4 , 125.8 , 124.6 , 119.8 , 116.6 , 107.6 , 62.5 , 55.0 .

IR (ATR): 3002, 1708, 1617, 1581, 1476, 1440, 1355, 1278, 1214, 1165, 1117, 1009, 962, 757, 697, 642 cm<sup>-1</sup>;

HRMS (EI) m/z calcd for C<sub>23</sub>H<sub>19</sub>NO<sub>3</sub> [M<sup>+</sup>]: 357.1365; found: 357.1368.

#### Preparation of *N*-(2,2-diphenyl-1-(*p*-tolylimino)ethyl)-*N*-methoxybenzamide (6):

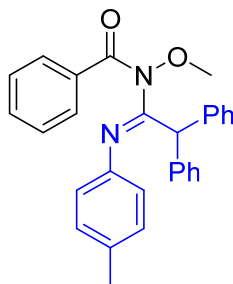

To an oven-dried Schlenk tube equipped with a magnetic stirring bar were added sequentially **1a** (0.45 mmol), **2a** (0.3 mmol), [Cp\*RhCl<sub>2</sub>]<sub>2</sub> (0.015 mmol), AgNTf<sub>2</sub> (0.045 mmol), 4A MS (60 mg) and dry DCE (2 mL) under N<sub>2</sub> atmosphere. The reaction vessel was heated to reflux in oil bath for 10 hours. Upon completion, The reaction mixture was cooled to room temperature and then the solvent was evaporated in vacuum. The residue was purified by column chromatography on silica gel (petroleum ether/ethyl acetate 10:1) to give the product **6** (125 mg, 96 %) as a white solid; **m.p.** 118 – 124 °C.

<sup>1</sup>H NMR (400 MHz, Chloroform-*d*) δ 7.29 – 7.25 (m, 8H), 7.24 – 7.20 (m, 3H), 7.12 – 7.06 (m, 4H), 6.92 (d, *J* = 8.0 Hz, 2H), 6.69 (d, *J* = 7.9 Hz, 2H), 5.46 (s, 1H), 3.62 (s, 3H), 2.24 (s, 3H).

<sup>13</sup>C NMR (101 MHz, Chloroform-*d*) δ 171.6 , 139.3 , 138.9 , 136.6 , 135.4 , 130.0 , 129.6 , 129.4 , 128.6 , 128.0 , 127.6 , 127.3 , 126.6 , 62.1 , 54.1 , 21.0 .

IR (ATR): 3060, 2926, 1661, 1602, 1509, 1451, 1329, 1298, 1180, 1050, 923, 897, 796, 742, 700 cm<sup>-1</sup>;

HRMS (EI) m/z calcd for C<sub>29</sub>H<sub>26</sub>N<sub>2</sub>O<sub>2</sub> [M<sup>+</sup>]: 434.1994; found: 434.1996.

## Scheme S1. Mechanistic Experiments and Their Procedures

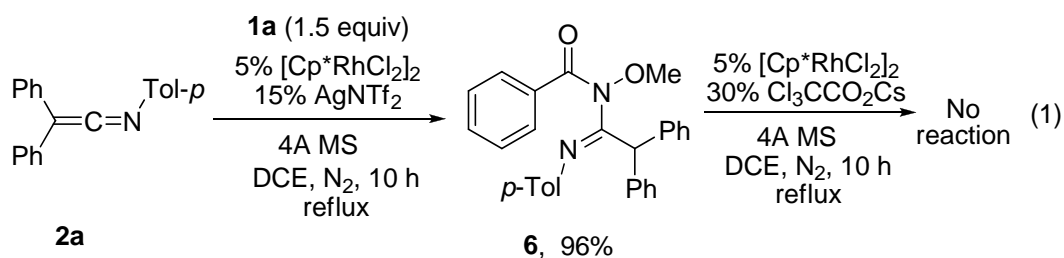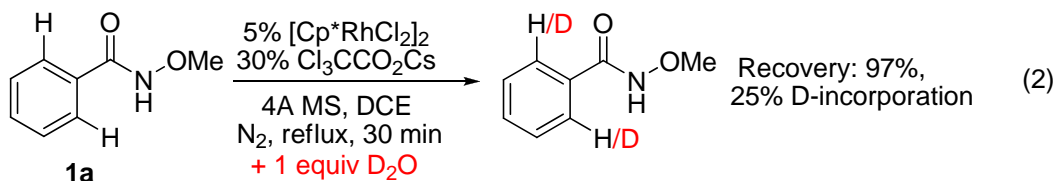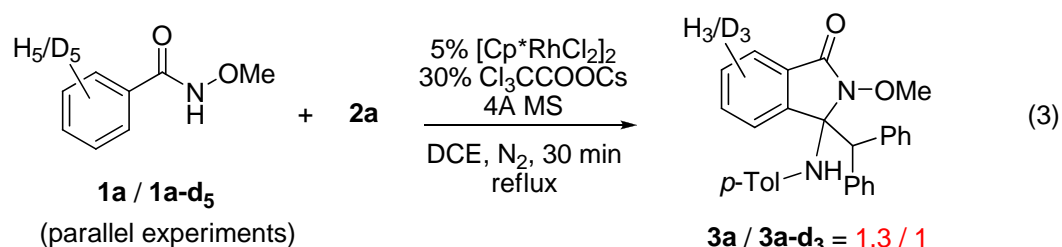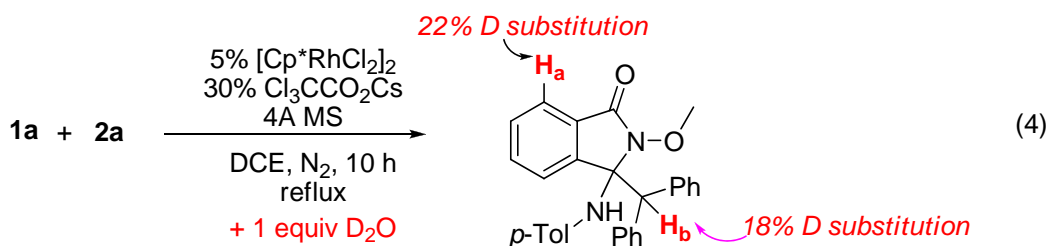

### (1) Intermediate exclusion experiment

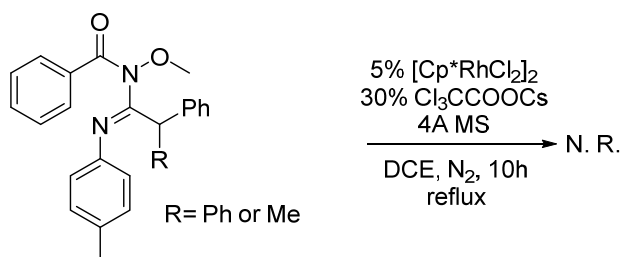

To an oven-dried Schlenk tube equipped with a magnetic stirring bar were added sequentially **6** (0.2 mmol), [Cp\*RhCl<sub>2</sub>]<sub>2</sub> (0.01 mmol), Cl<sub>3</sub>CCO<sub>2</sub>Cs (0.06 mmol), 4A MS (40 mg) and dry DCE (1.5 mL) under N<sub>2</sub> atmosphere. The reaction vessel was heated to reflux in oil bath for 10 hours. Upon completion, TLC showed that no [4+1] or [4+2] product was found and the reactant was unreacted.

### (2) The reversibility of the C–H activation step in absence of ketenimines

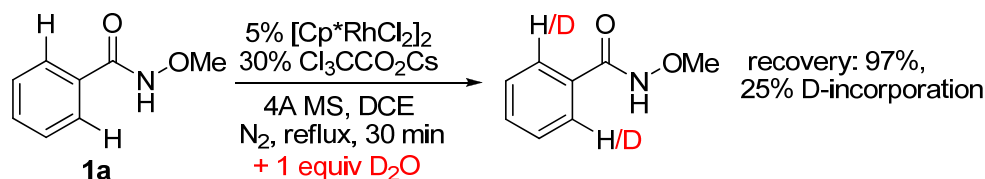

To a dried Schlenk tube equipped with a Teflon-coated magnetic stirring bar were added **1a** (31 mg, 0.2 mmol),  $[\text{Cp}^*\text{RhCl}_2]_2$  (6 mg, 0.01 mmol),  $\text{Cl}_3\text{CCO}_2\text{Cs}$  (18 mg, 0.06 mmol), 4A MS (40mg),  $\text{D}_2\text{O}$  (0.2 mmol, 4  $\mu\text{L}$ ) and DCE (1.5 mL) under  $\text{N}_2$  atmosphere. The reaction vessel was stirred at  $80^\circ\text{C}$  for 30 minutes. The solvent was removed under vacuum and the residue was purified by flash column chromatography on silica gel (eluent: petroleum ether/ethyl acetate = 1:1) to afford **1a** (30 mg, 97%).

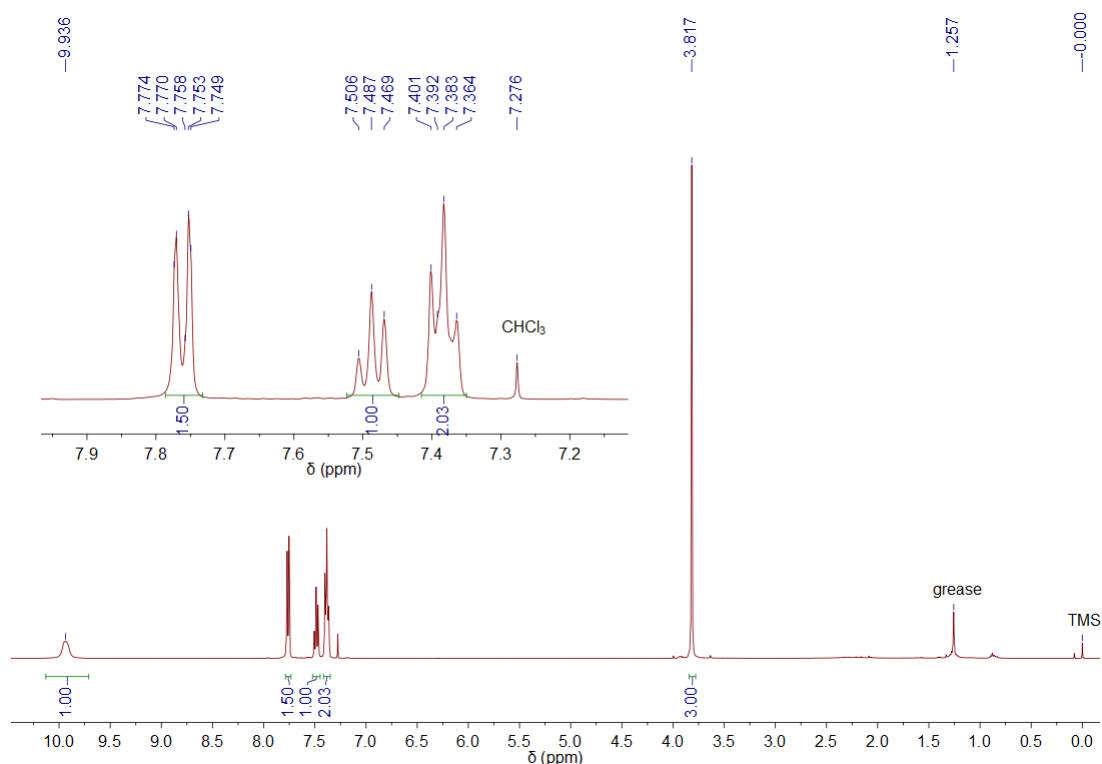

### (3) Kinetic isotope effect

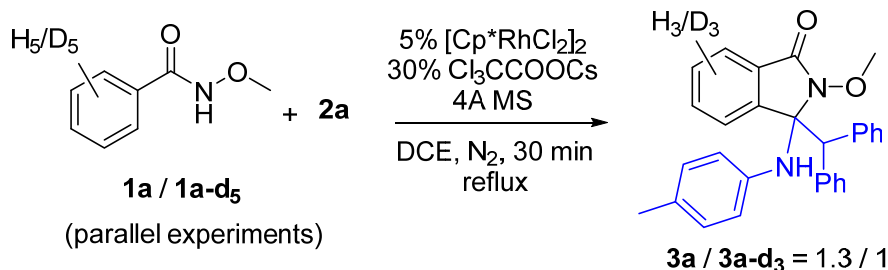

Following general procedure, to a dried Schlenk tube equipped with a Teflon-coated magnetic stirring bar were added **1a** (0.24 mmol), **2a** (0.2 mmol),  $[\text{Cp}^*\text{RhCl}_2]_2$  (0.01 mmol),  $\text{Cl}_3\text{CCOOCs}$  (0.06 mmol), 4A M S(40 mg) and DCE (1.5 mL) under  $\text{N}_2$  atmosphere. In another Schlenk tube, **1a-d<sub>5</sub>** (0.24 mmol) was used instead of **1a**. The two reactions were allowed to stir at  $80^\circ\text{C}$  for 30 min and then were combined. The solvent was removed under vacuum and the residue was

purified by flash column chromatography on silica gel (eluent: petroleum ether/ethyl acetate = 5:1) to afford the product (59 mg, 34% combined yield). The value of  $K_H/K_D$  was obtained based on  $^1\text{H}$ NMR.

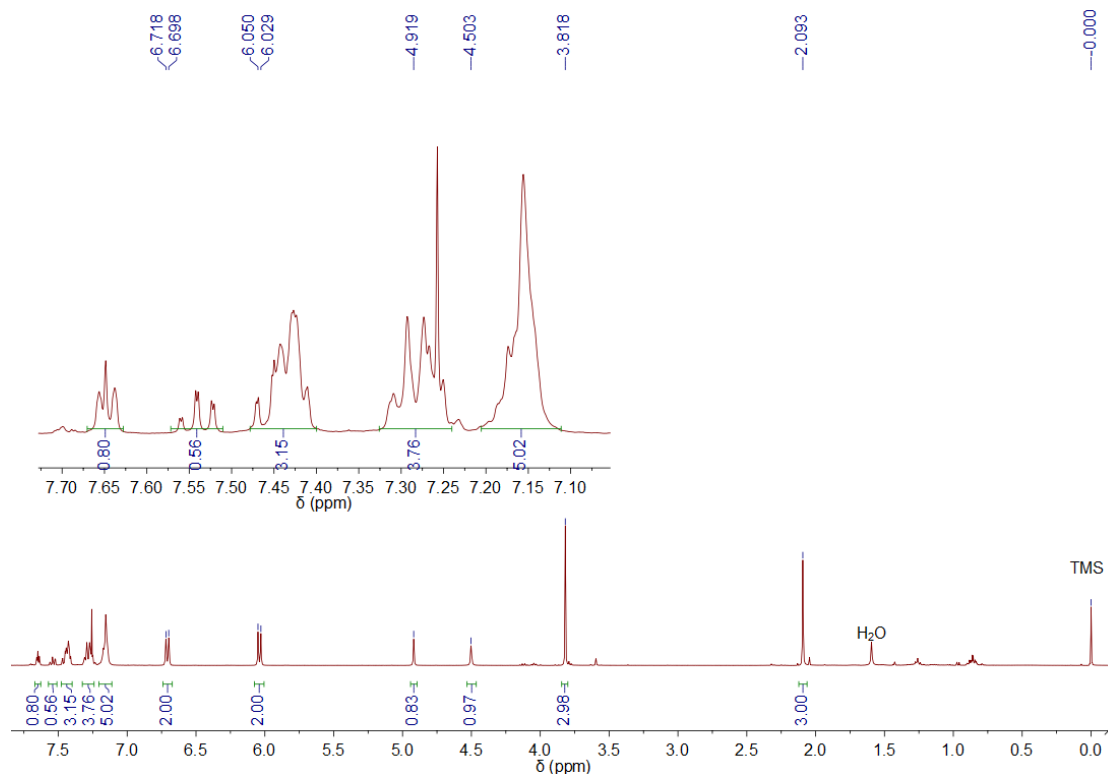

#### (4) [4+1] reaction with the additive of $\text{D}_2\text{O}$

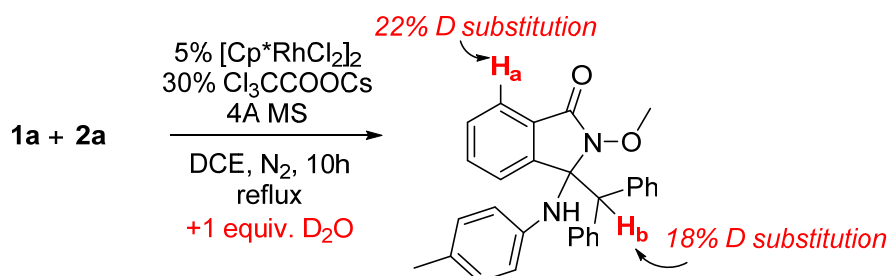

To a dried Schlenk tube equipped with a Teflon-coated magnetic stirring bar were added **1a** (0.24 mmol), **2a** (0.2 mmol),  $[\text{Cp}^*\text{RhCl}_2]_2$  (0.01 mmol),  $\text{Cl}_3\text{CCOOCs}$  (0.06 mmol), 4A MS(40mg),  $\text{D}_2\text{O}$  (0.2 mmol, 4  $\mu\text{L}$ ) and DCE (1.5 mL) under  $\text{N}_2$  atmosphere. The reaction vessel was stirred at  $80^\circ\text{C}$  for 10 hours. The solvent was removed under vacuum and the residue was purified by flash column chromatography on silica gel (eluent: petroleum ether/ethyl acetate = 5:1) to afford **1a** (51 mg, 59%).



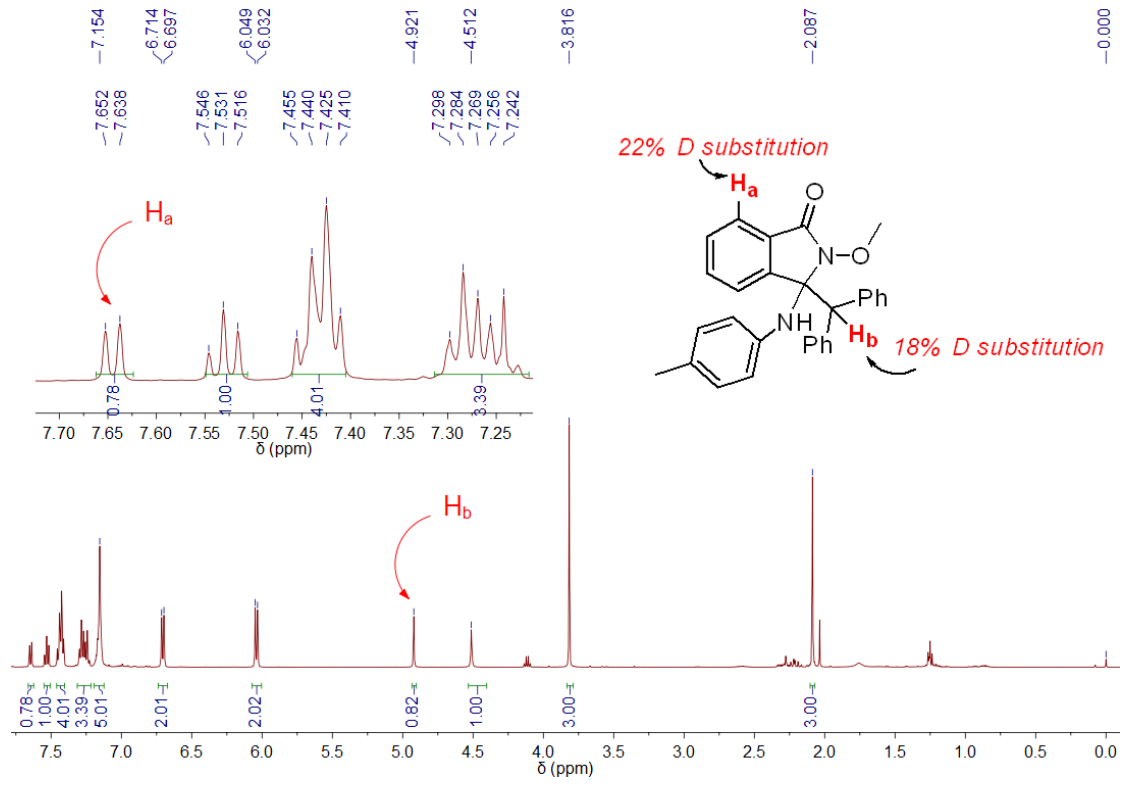

**Figure S3.** UV-vis absorption and fluorescence spectra of **4a-5d**

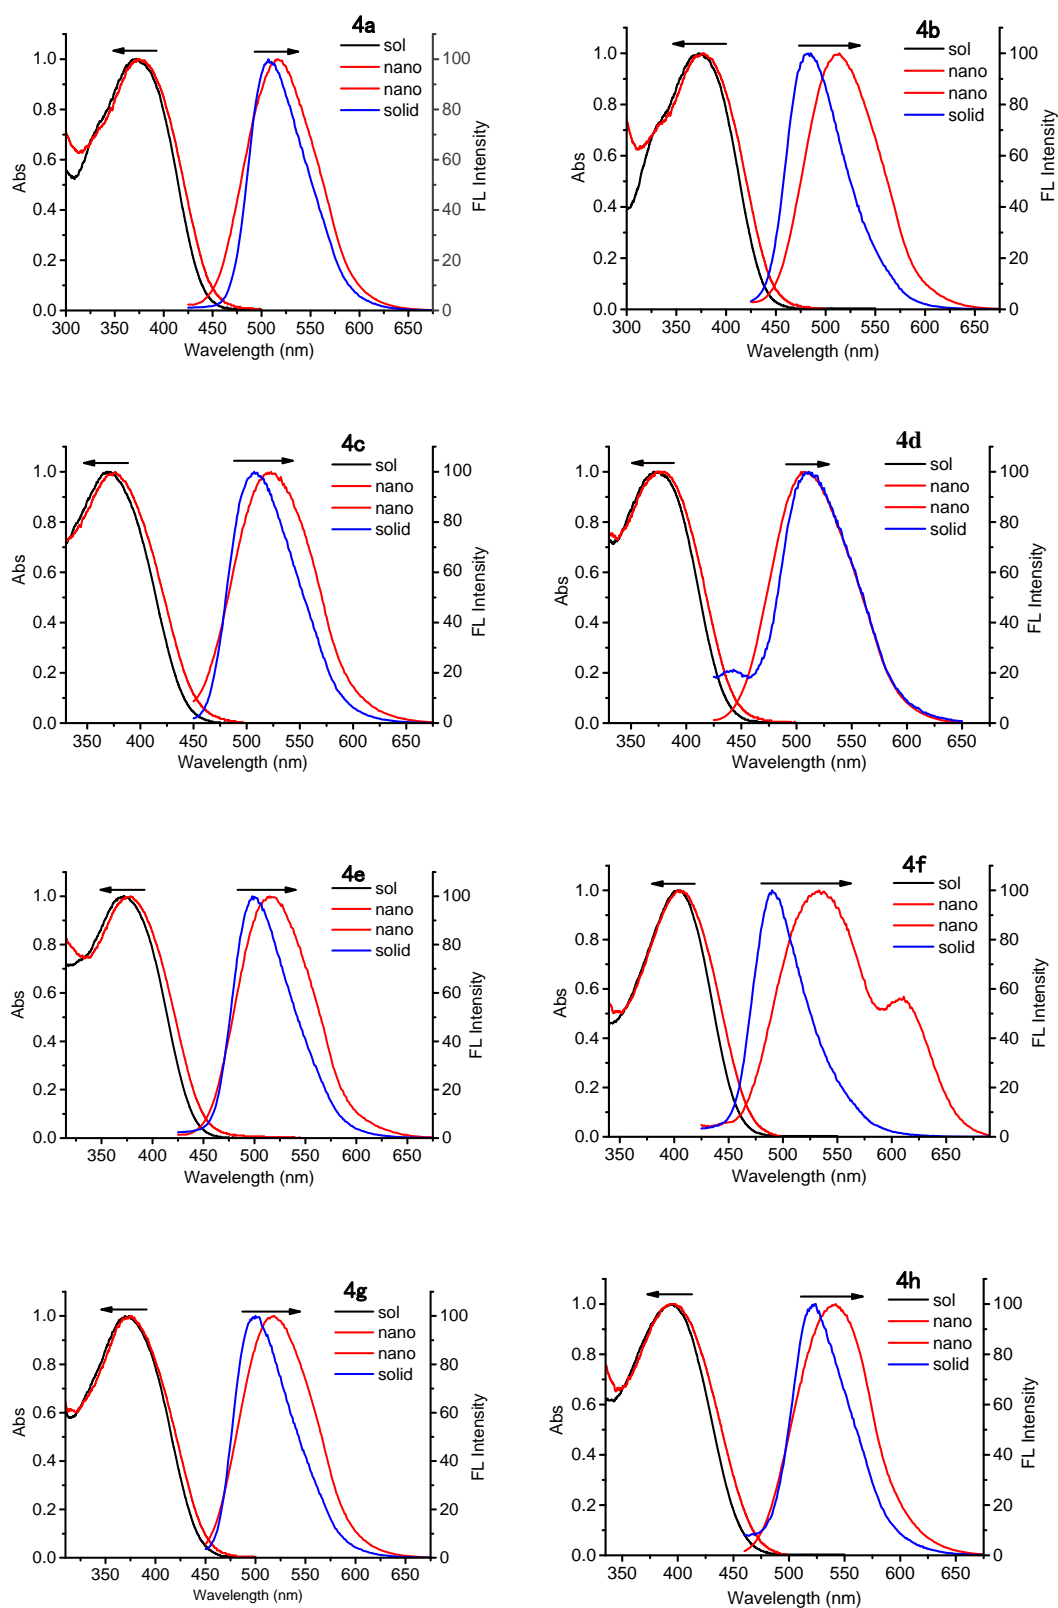



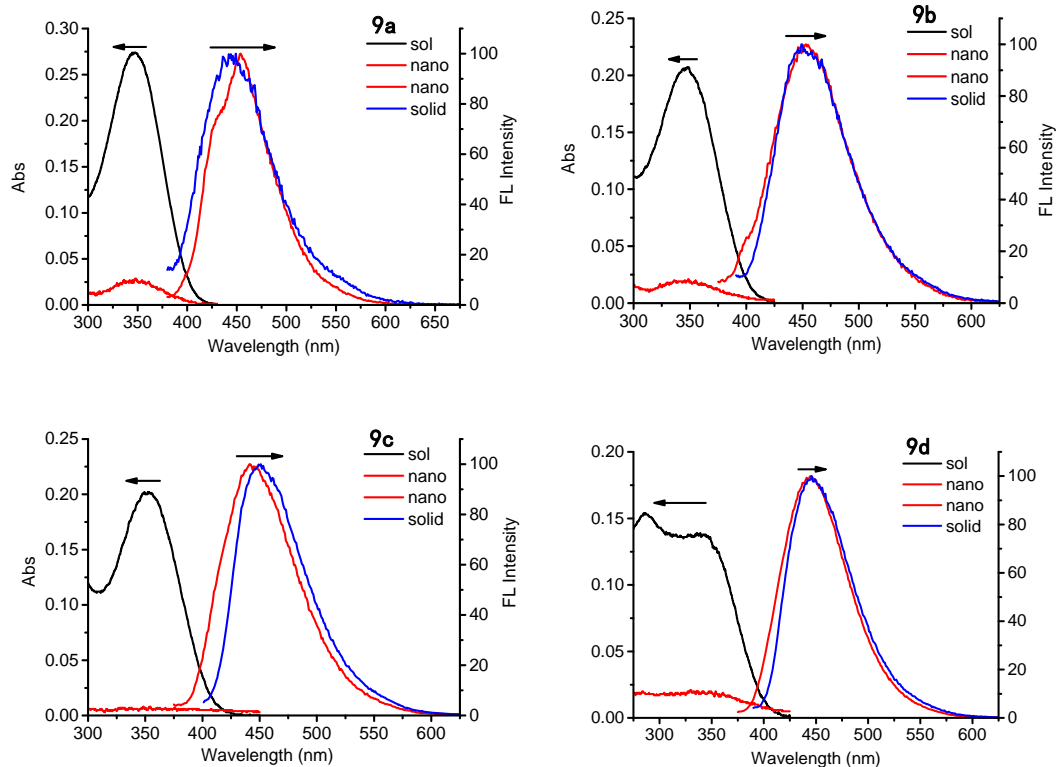

All the absorption and emission spectra were obtained in a concentration scale of  $10^{-5}$  M. Then they were normalized except the absorption spectra of **5a-d**. Back line respects absorption in the THF. Red line respect absorption and emission in THF/water mixtures (5:95), respectively. Blue line stands for emission in solid.

**Table S3.** Data of DFT Studies

| Method<br>Compound | UV                              | B3LYP/6-31G*      |                   |                  |             | % $\Delta^b$ |
|--------------------|---------------------------------|-------------------|-------------------|------------------|-------------|--------------|
|                    | Absorption<br>(nm) <sup>a</sup> | LUMO<br>(Hartree) | HOMO<br>(Hartree) | Gap<br>(Hartree) | Gap<br>(nm) |              |
| <b>4a</b>          | 373                             | -0.07686          | -0.19821          | 0.12135          | 375         | 0.7          |
| <b>4b</b>          | 373                             | -0.08789          | -0.20940          | 0.12151          | 375         | 0.5          |
| <b>4c</b>          | 372                             | -0.08745          | -0.20712          | 0.11967          | 381         | 2.3          |
| <b>4d</b>          | 376                             | -0.08215          | -0.20465          | 0.12250          | 372         | -1.1         |
| <b>4e</b>          | 372                             | -0.08904          | -0.20949          | 0.12045          | 378         | 1.7          |
| <b>4f</b>          | 405                             | -0.08240          | -0.19788          | 0.11548          | 395         | -2.6         |
| <b>4g</b>          | 375                             | -0.09815          | -0.21873          | 0.12058          | 378         | 0.8          |
| <b>4h</b>          | 394                             | -0.08900          | -0.20455          | 0.11555          | 394         | 0            |
| <b>4i</b>          | 412                             | -0.08484          | -0.19799          | 0.11315          | 403         | -2.3         |
| <b>4j</b>          | 387                             | -0.08279          | -0.20239          | 0.11960          | 381         | -1.6         |
| <b>4k</b>          | 374                             | -0.09337          | -0.21318          | 0.11981          | 380         | 1.7          |
| <b>4l</b>          | 375                             | -0.08386          | -0.20716          | 0.12330          | 370         | -1.5         |
| <b>4m</b>          | 362                             | -0.08704          | -0.21248          | 0.12544          | 363         | 0.3          |
| <b>4n</b>          | 357                             | -0.07843          | -0.20627          | 0.12784          | 356         | -0.2         |
| <b>4o</b>          | 364                             | -0.08053          | -0.20635          | 0.12582          | 362         | -0.5         |
| <b>4p</b>          | 362                             | -0.07522          | -0.20373          | 0.12851          | 355         | -2.1         |
| <b>5a</b>          | 348                             | -0.08218          | -0.21369          | 0.13151          | 346         | -0.4         |
| <b>5b</b>          | 348                             | -0.08051          | -0.21113          | 0.13062          | 349         | 0.2          |
| <b>5c</b>          | 349                             | -0.08977          | -0.21950          | 0.12973          | 351         | 0.6          |
| <b>5d</b>          | 343                             | -0.07770          | -0.21056          | 0.13286          | 343         | 0            |

<sup>a</sup> The wavelength of absorption was obtained by UV-vis spectrometer in the THF.

<sup>b</sup> % $\Delta$  = 100 x (Gap - Absorption)/Gap

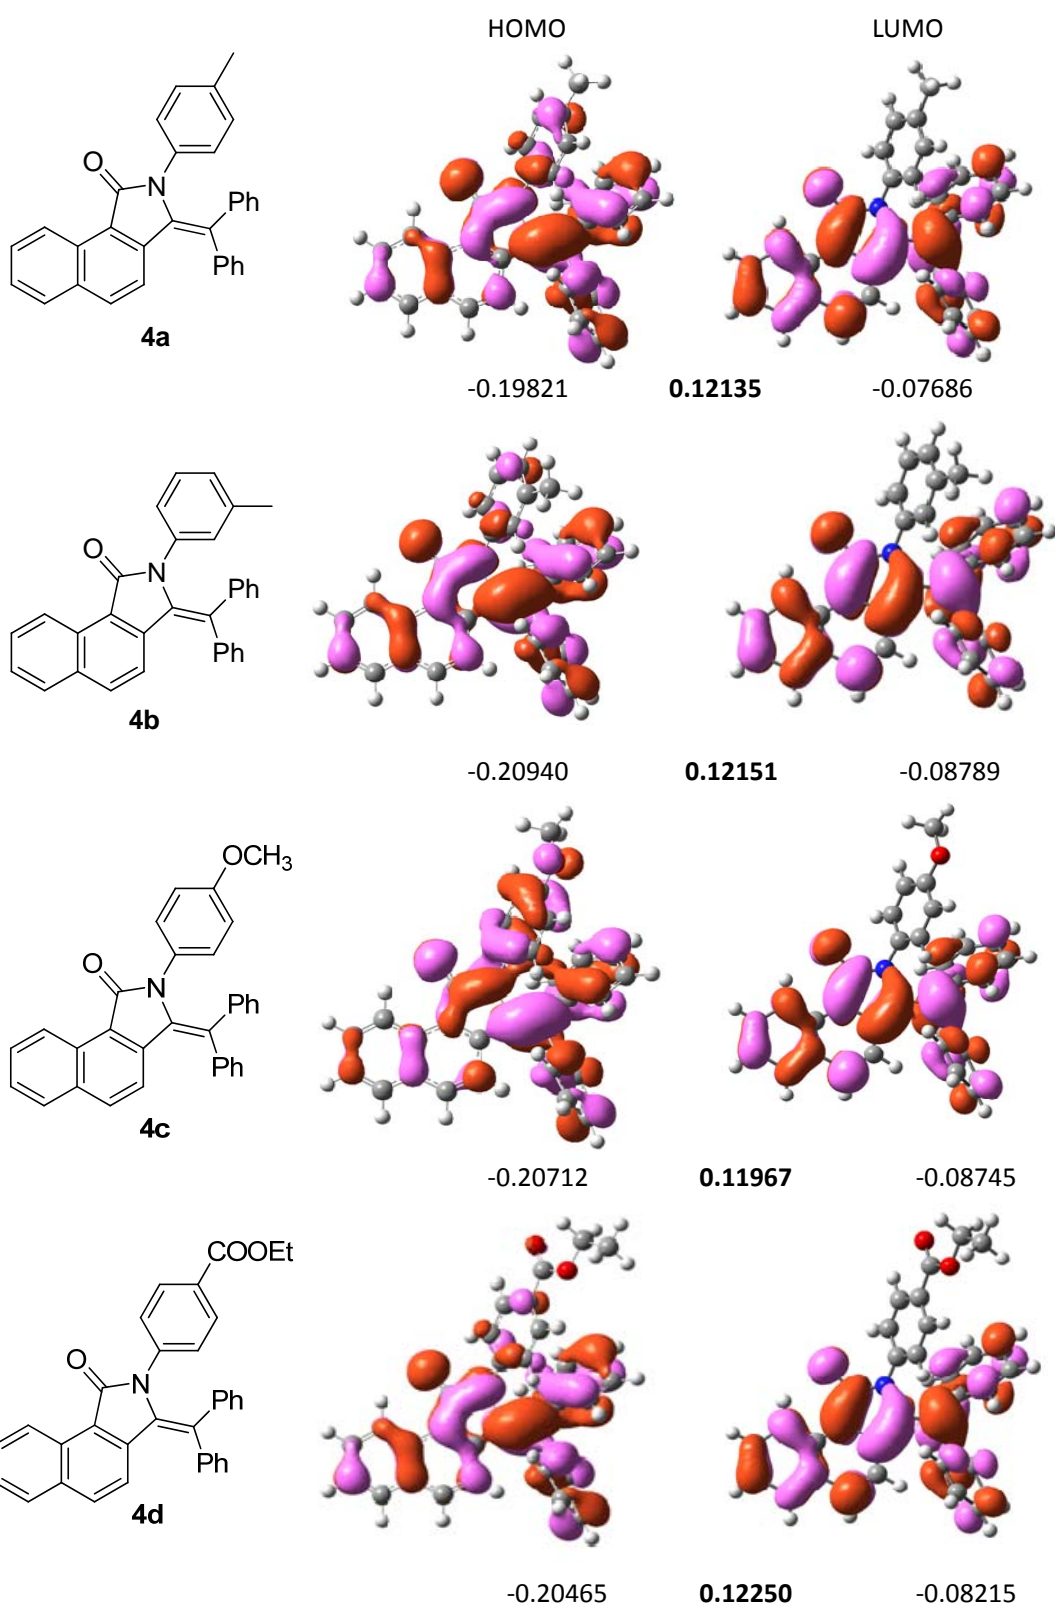

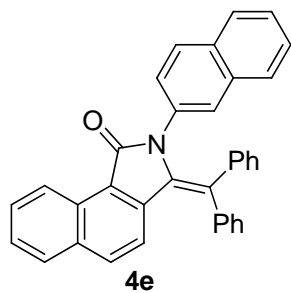

HOMO

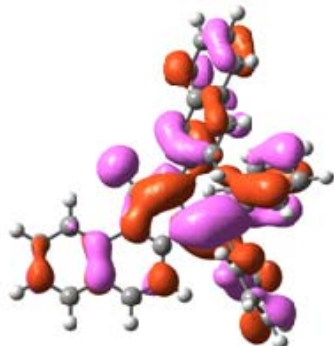

-0.20949

LUMO

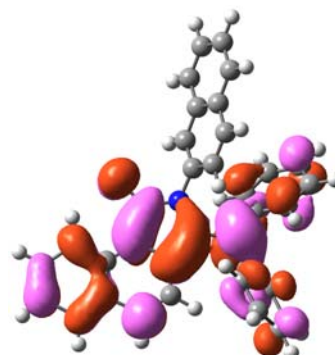

-0.08904

**0.12045**

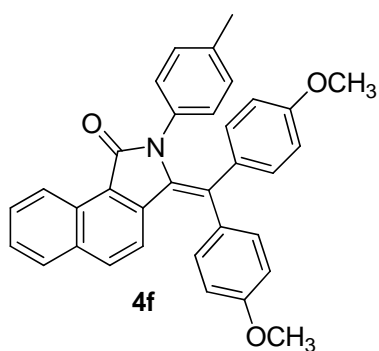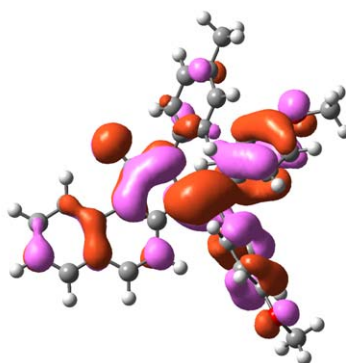

-0.19788

-0.08240

**0.11548**

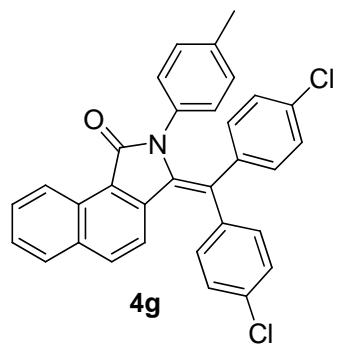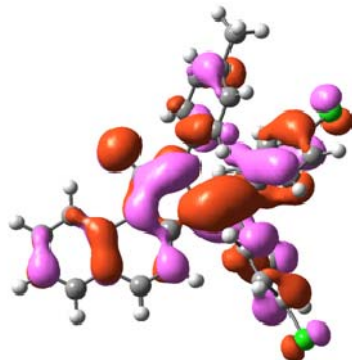

-0.21873

-0.09815

**0.12058**

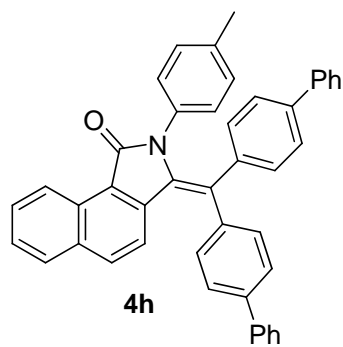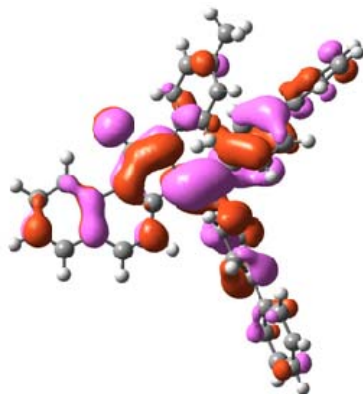

-0.20455

-0.08900

**0.11555**



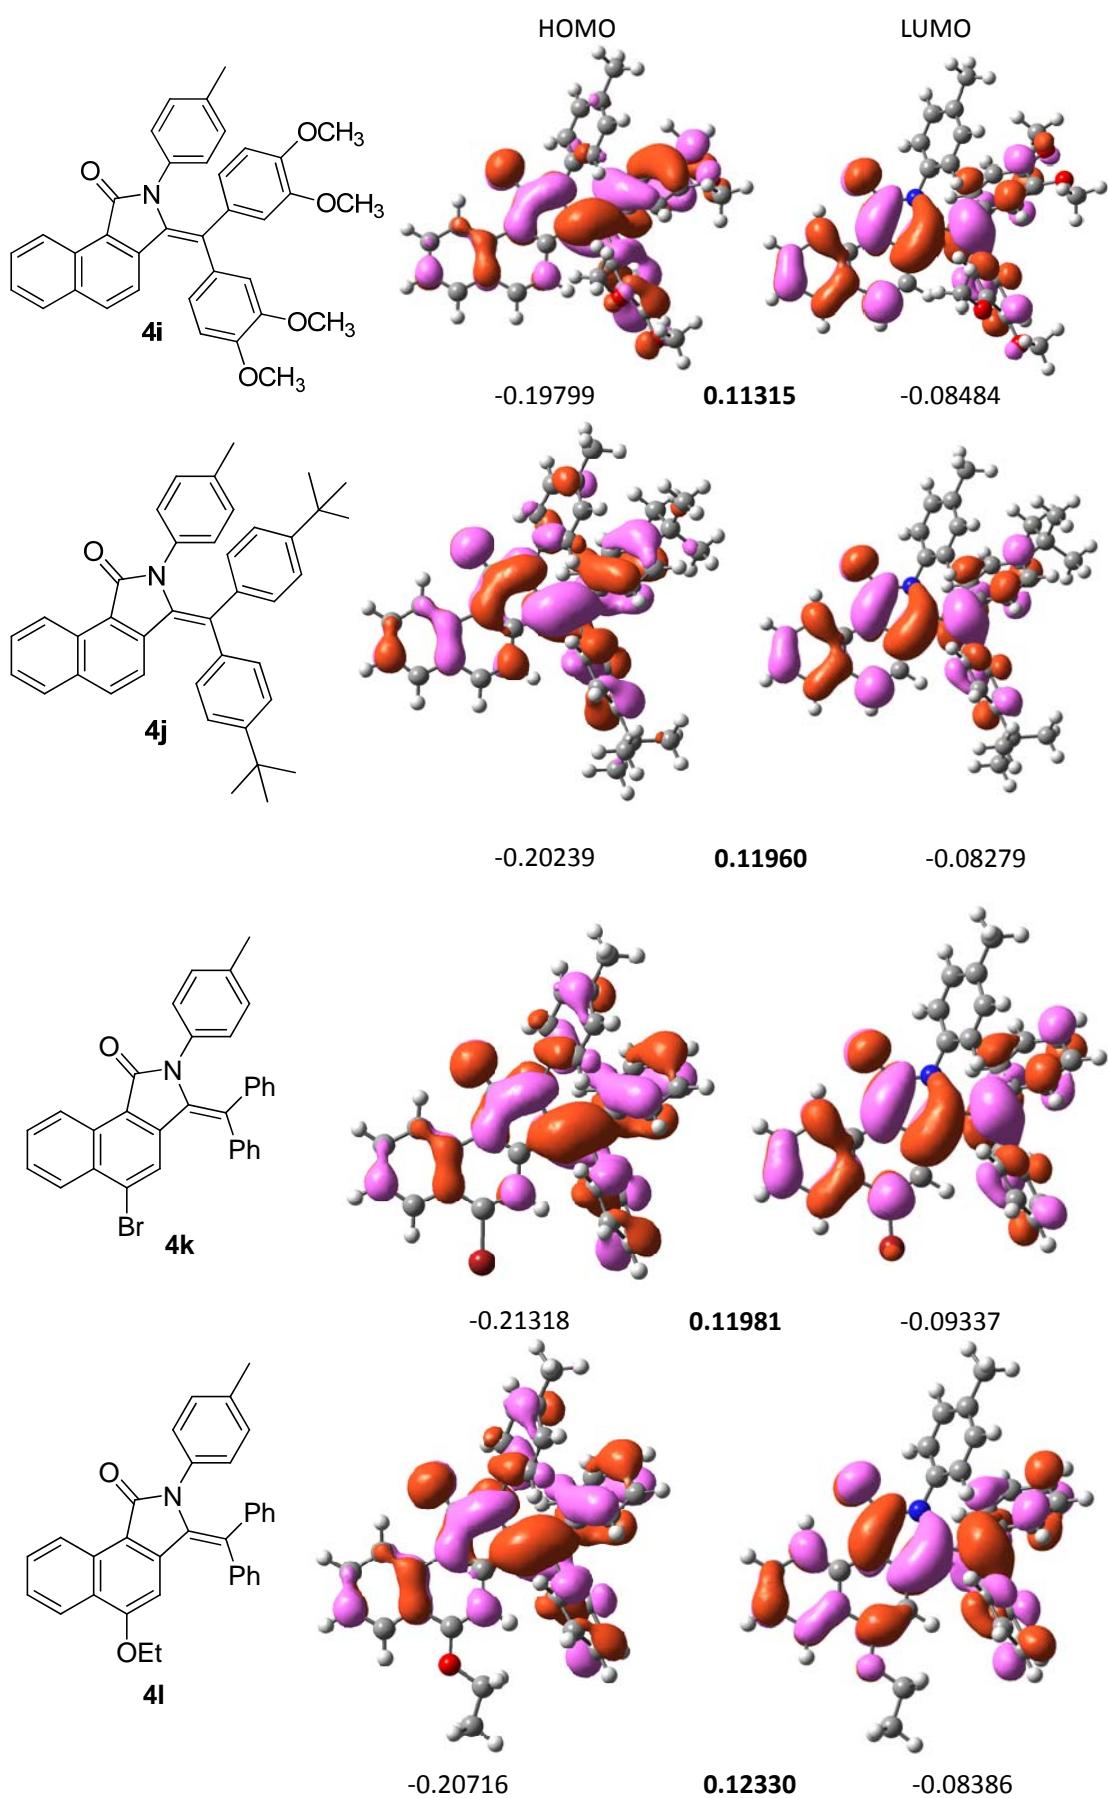



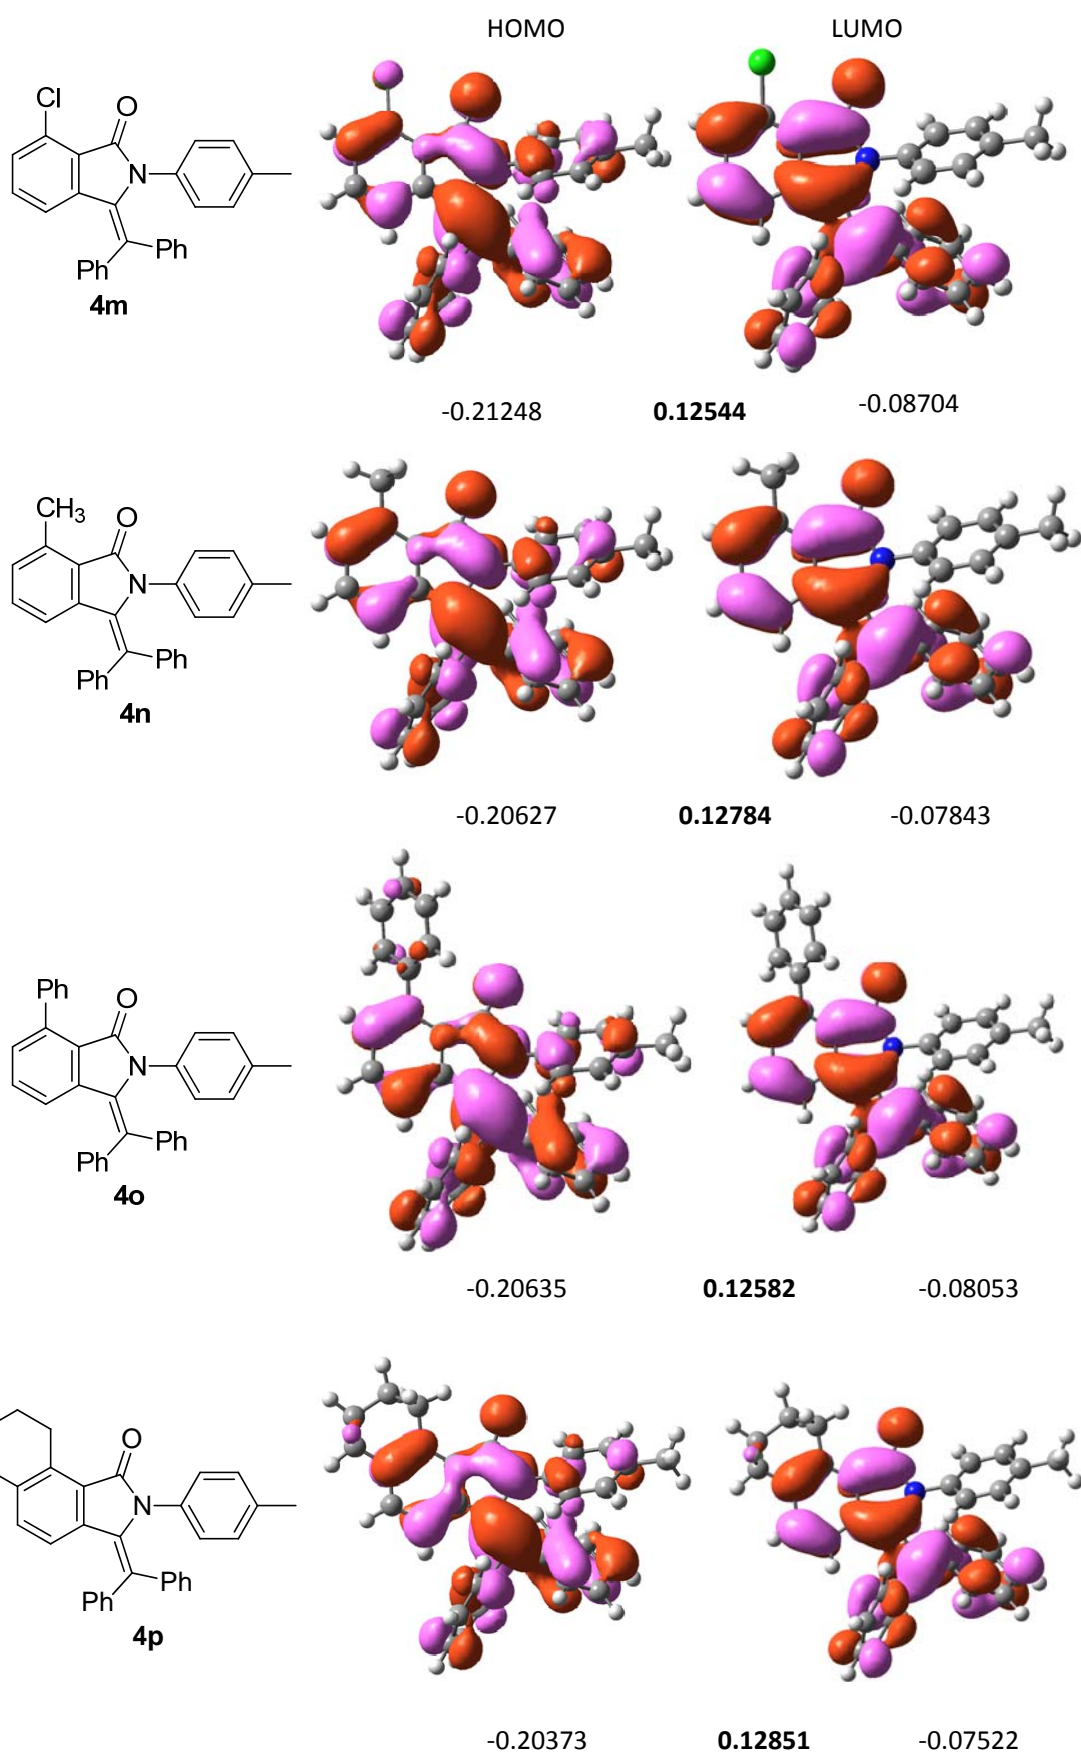

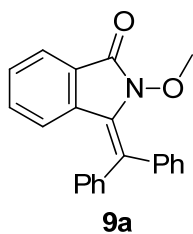

HOMO

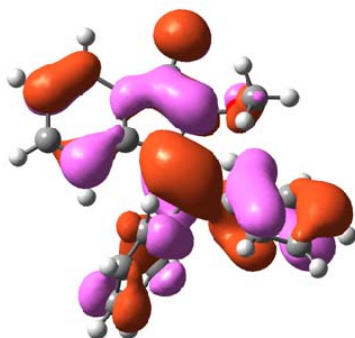

-0.21369

LUMO

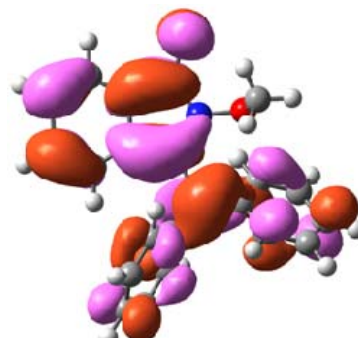

-0.08218

**0.13151**

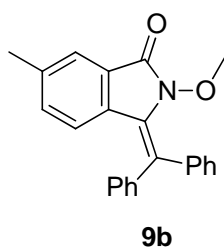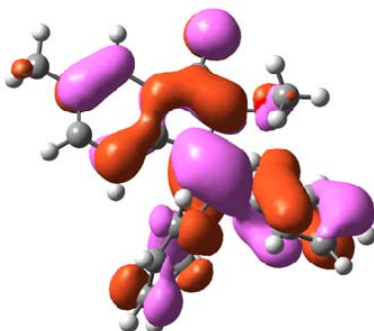

-0.21113

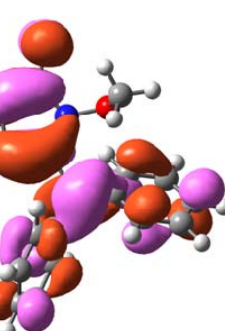

-0.08051

**0.13062**

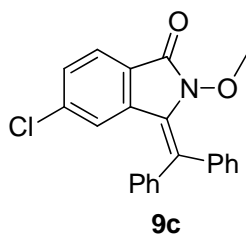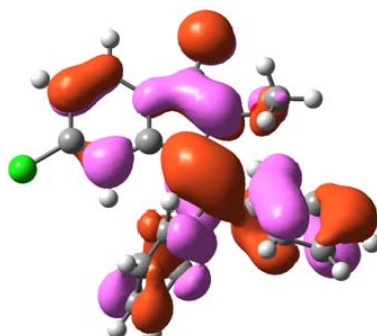

-0.21950

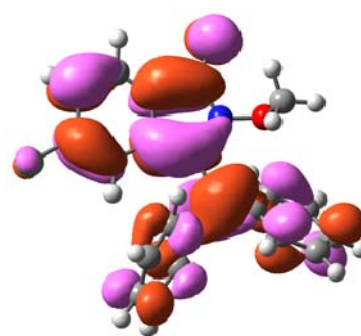

-0.08977

**0.12973**

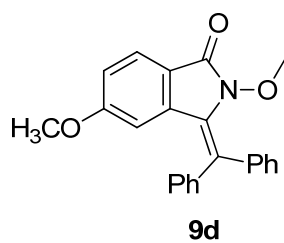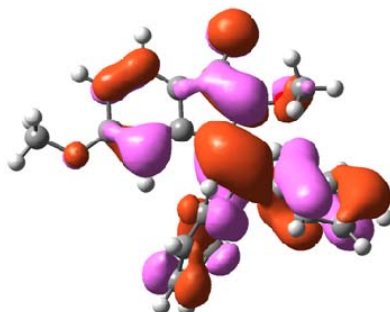

-0.21056

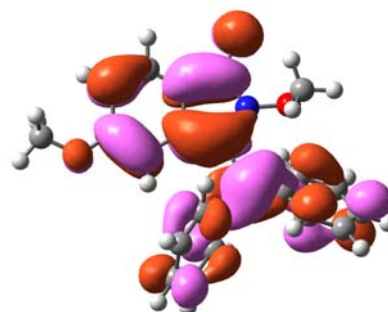

-0.07770

**0.13286**

# Copies of NMR Spectra

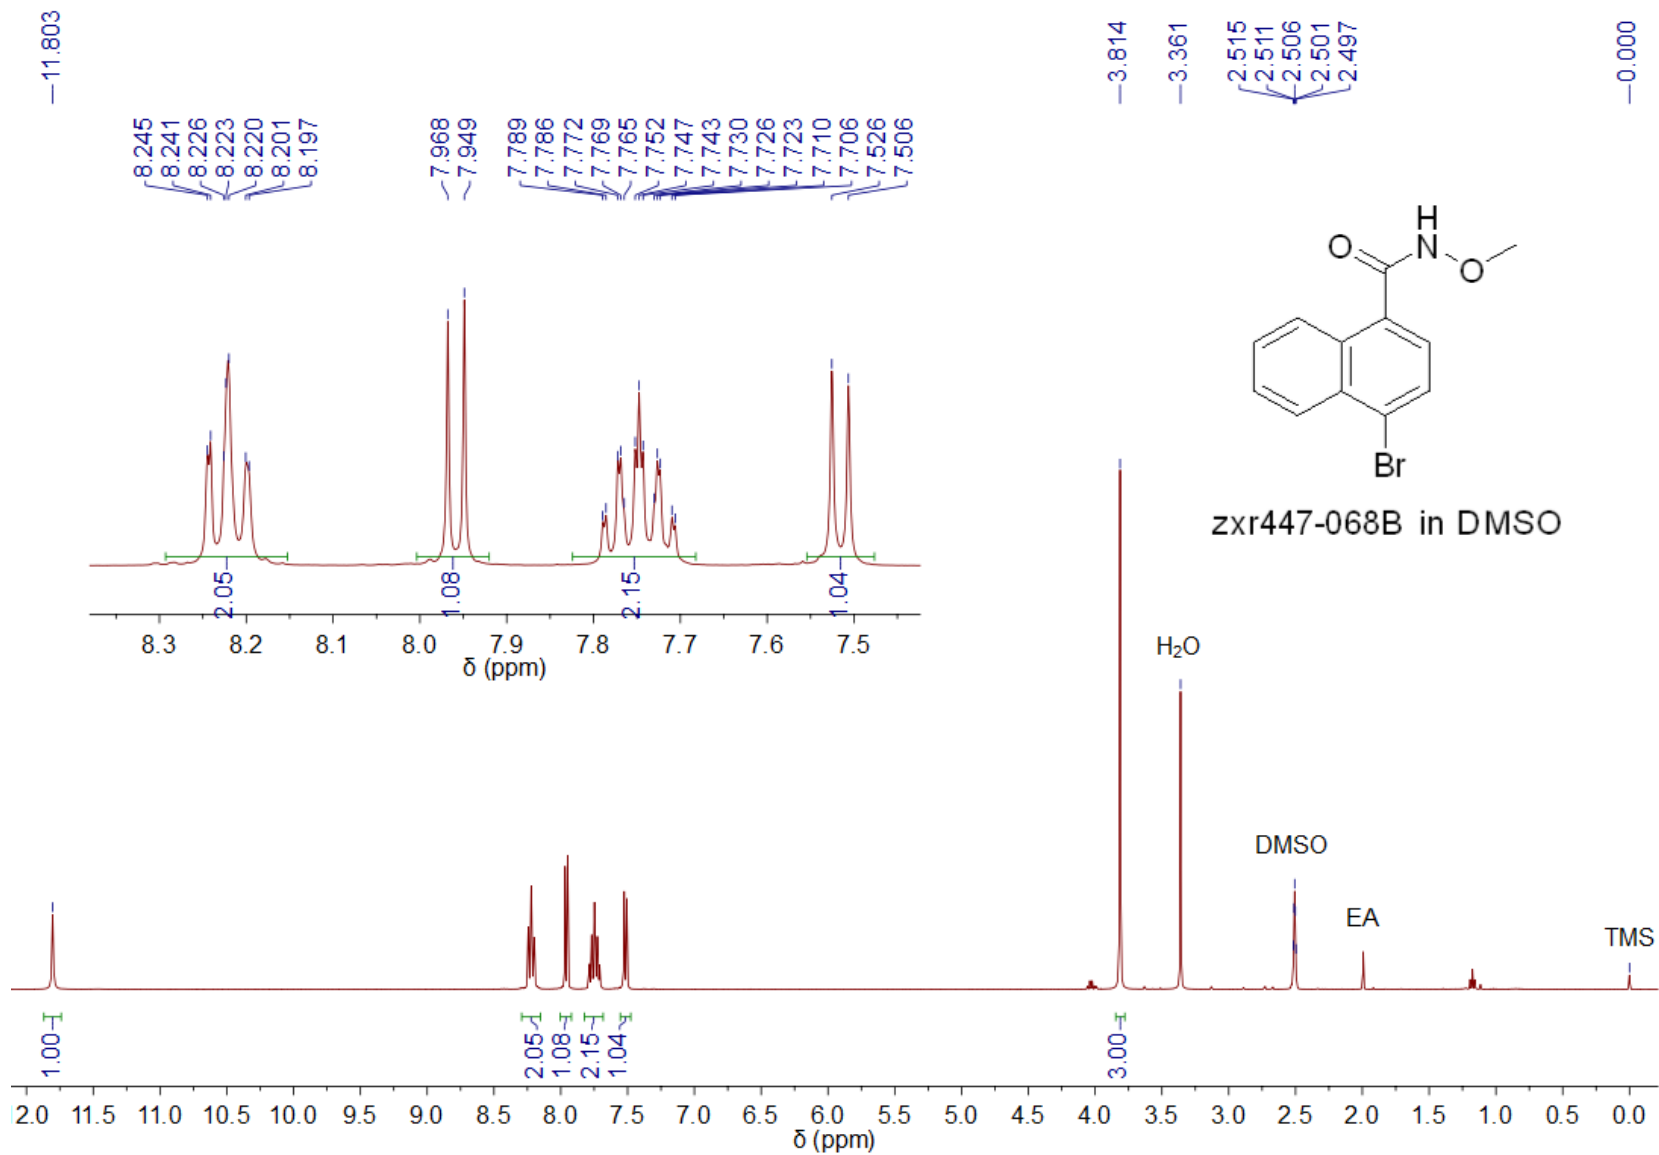

**1p** - <sup>1</sup>H NMR

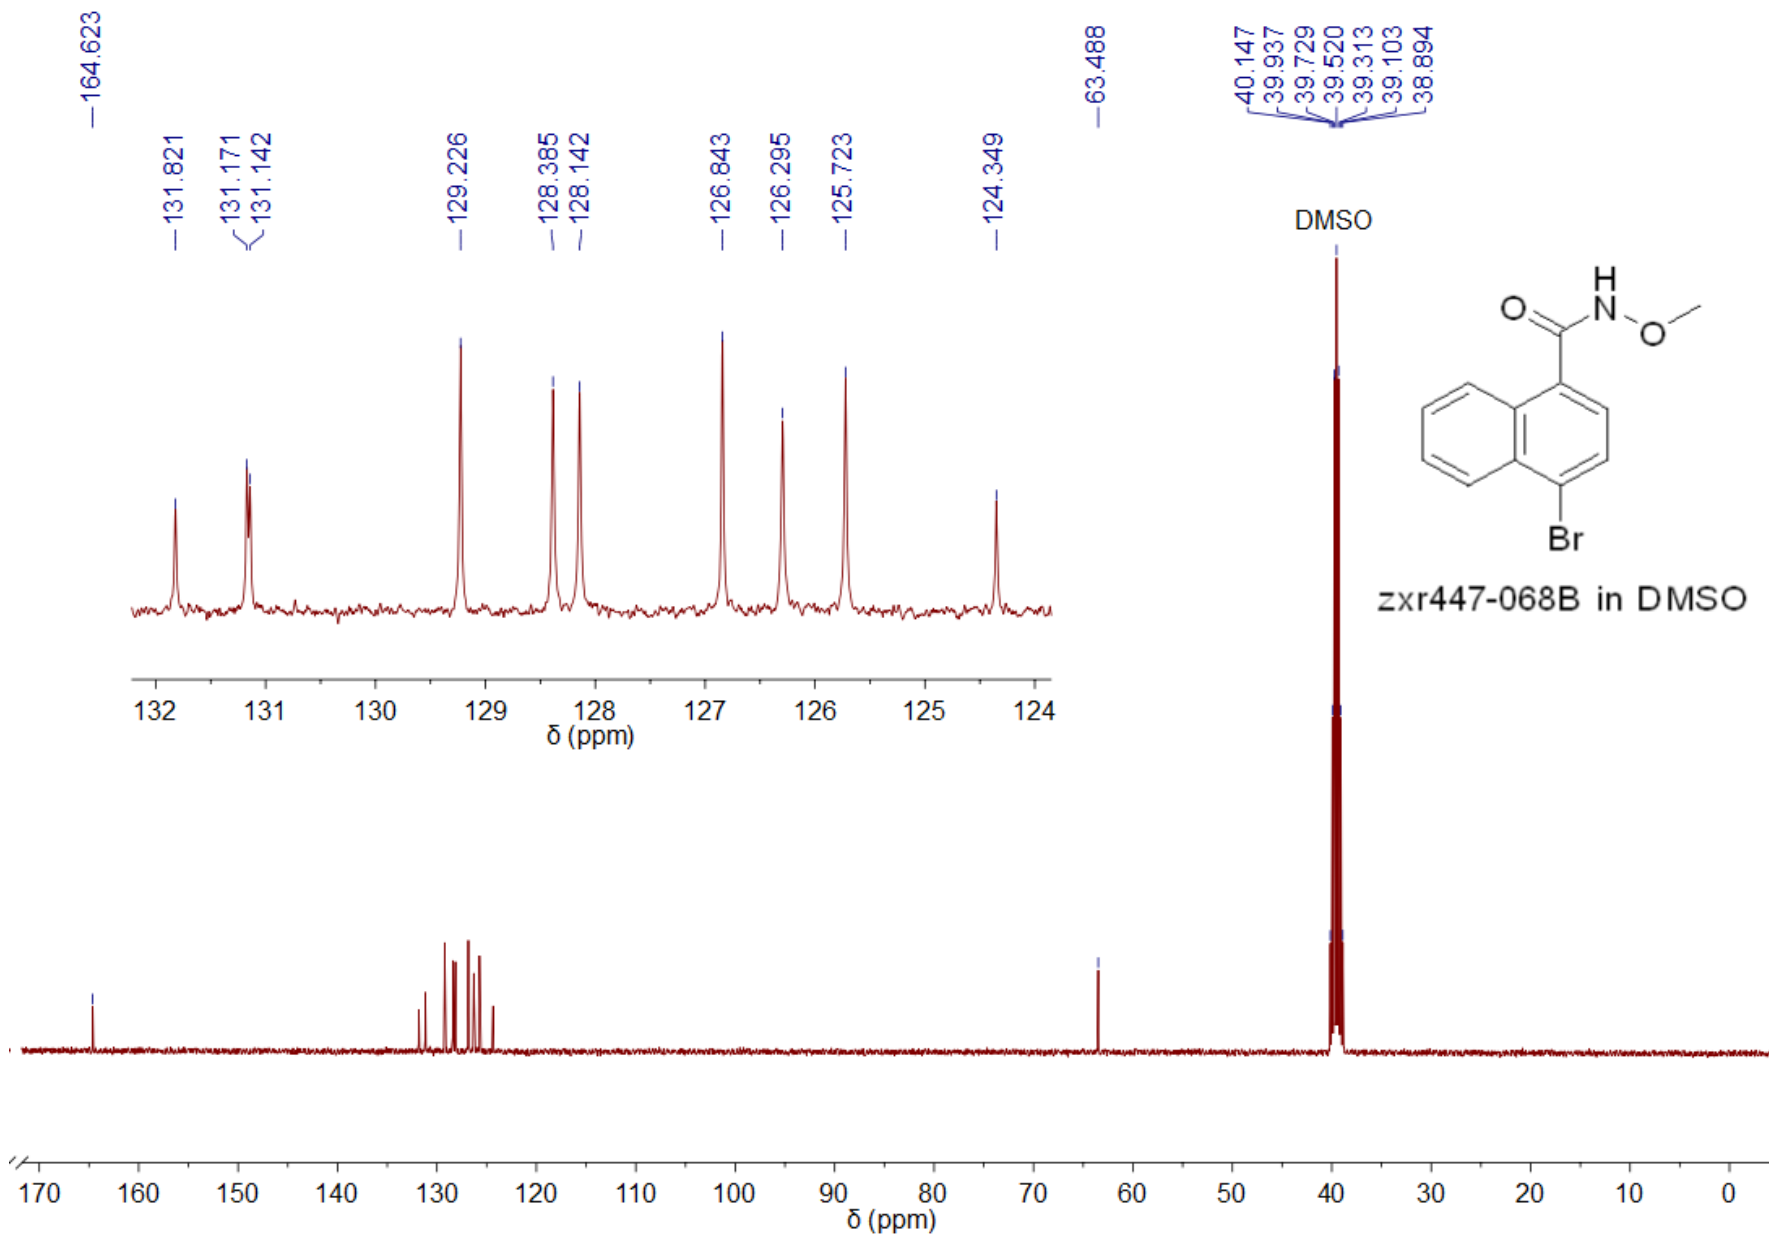

1p - <sup>13</sup>C NMR

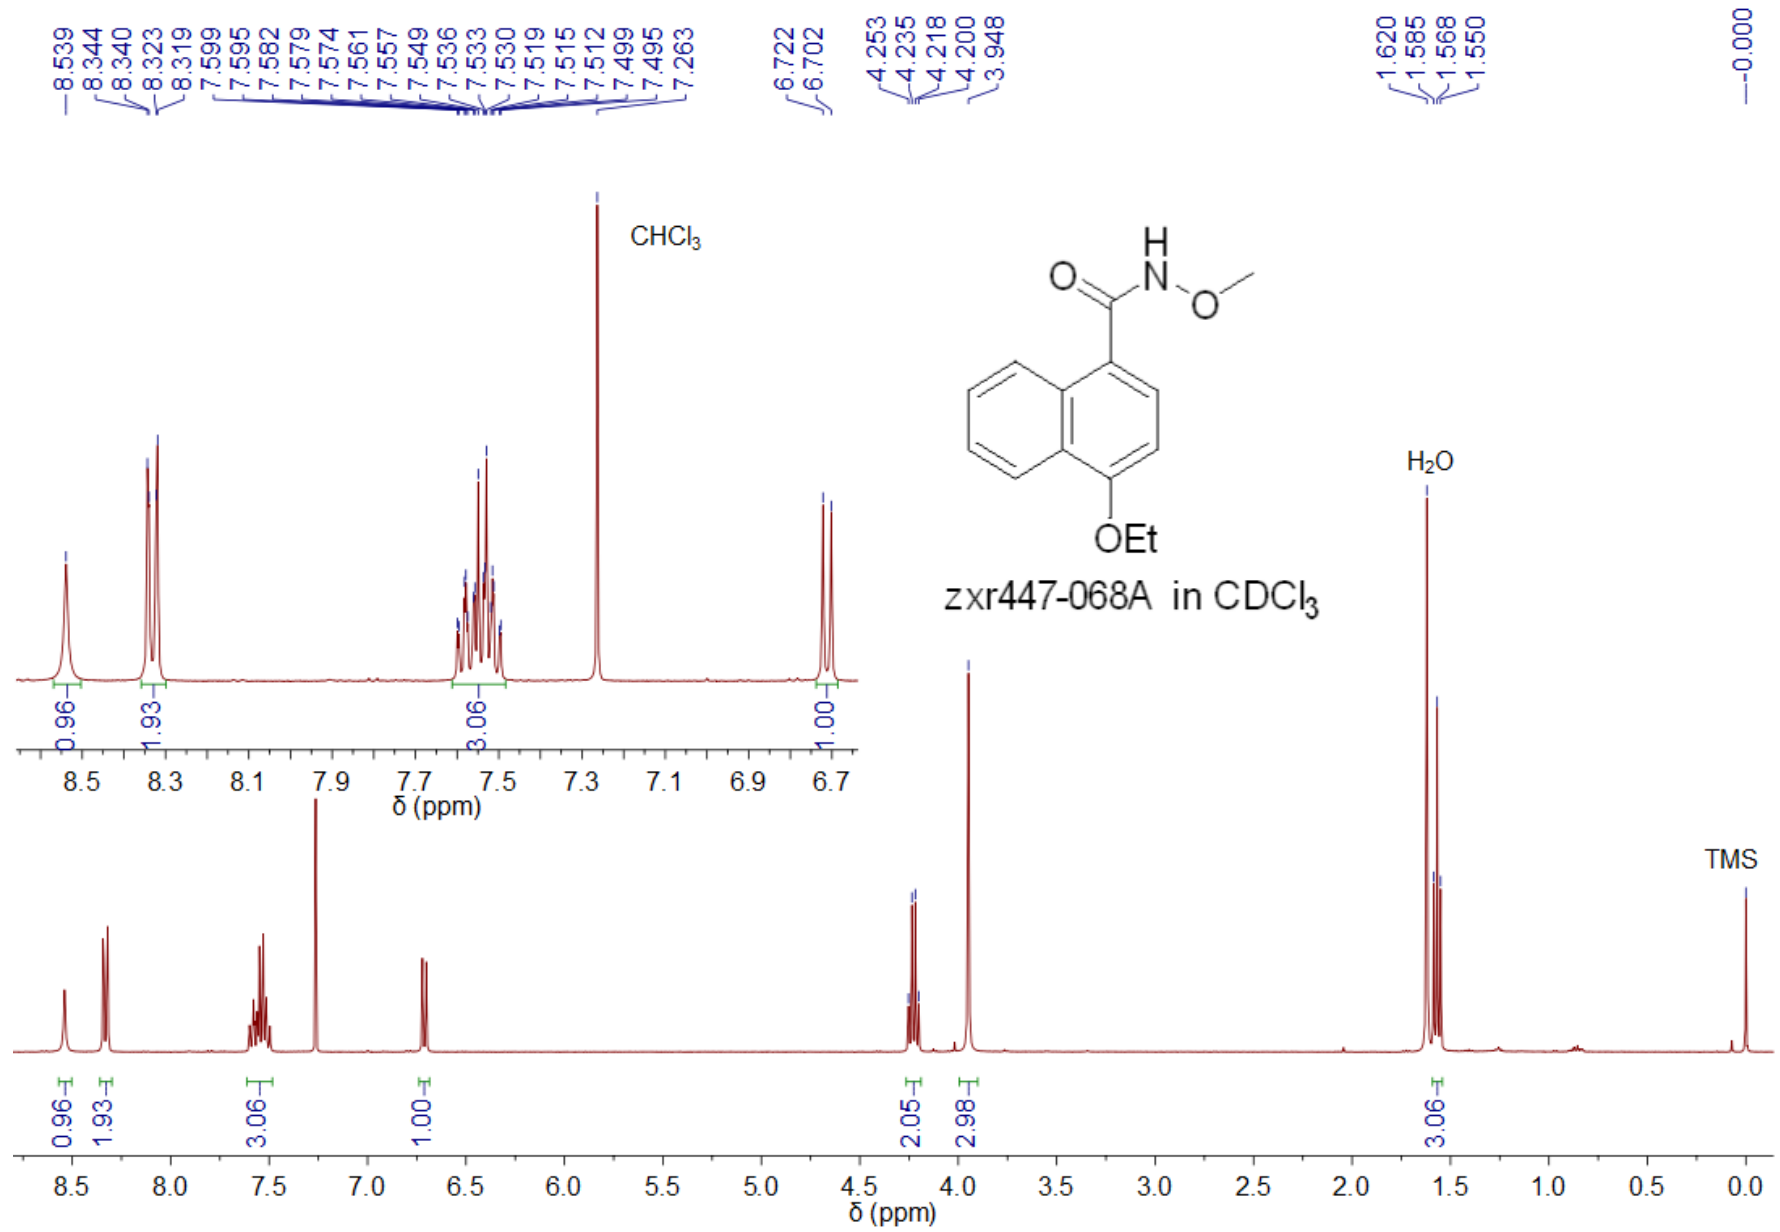

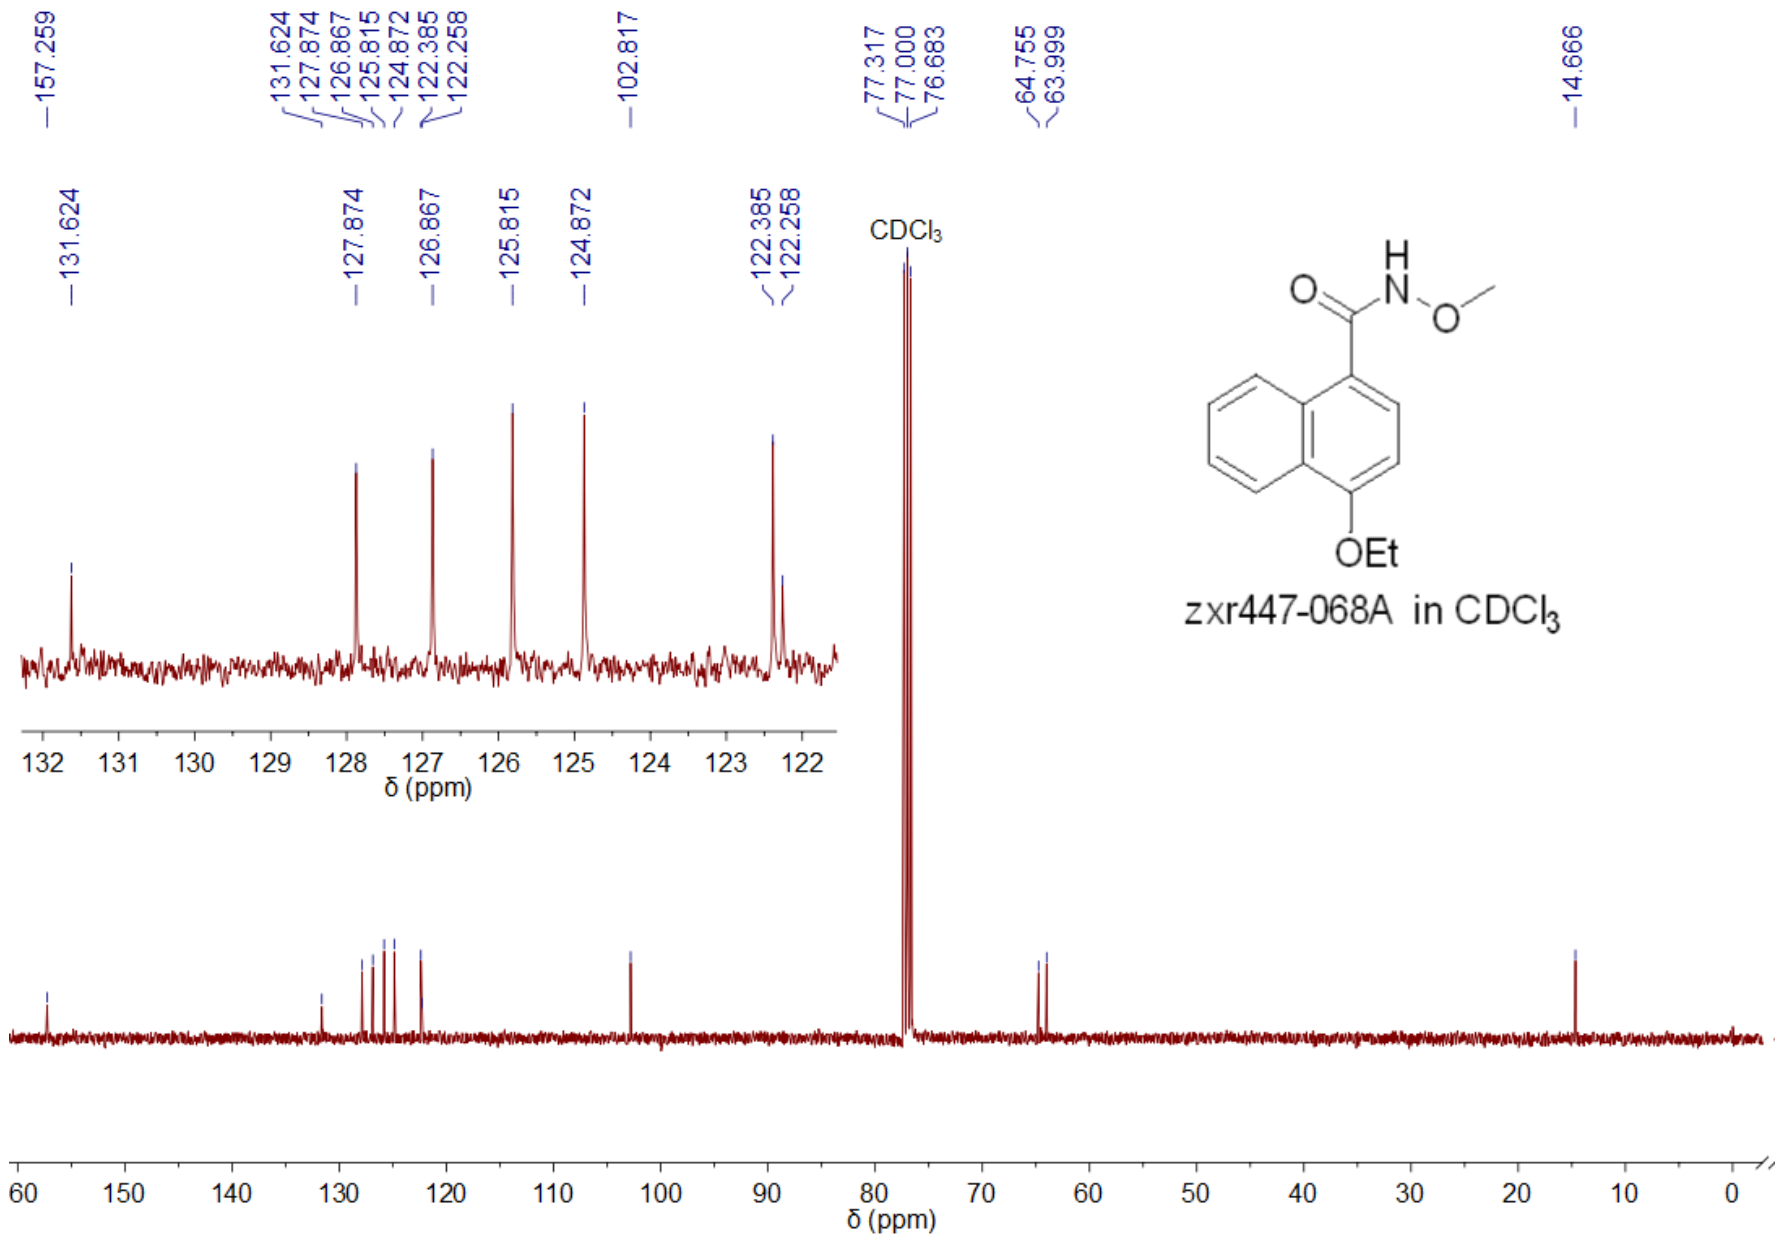

**1q** - <sup>13</sup>C NMR

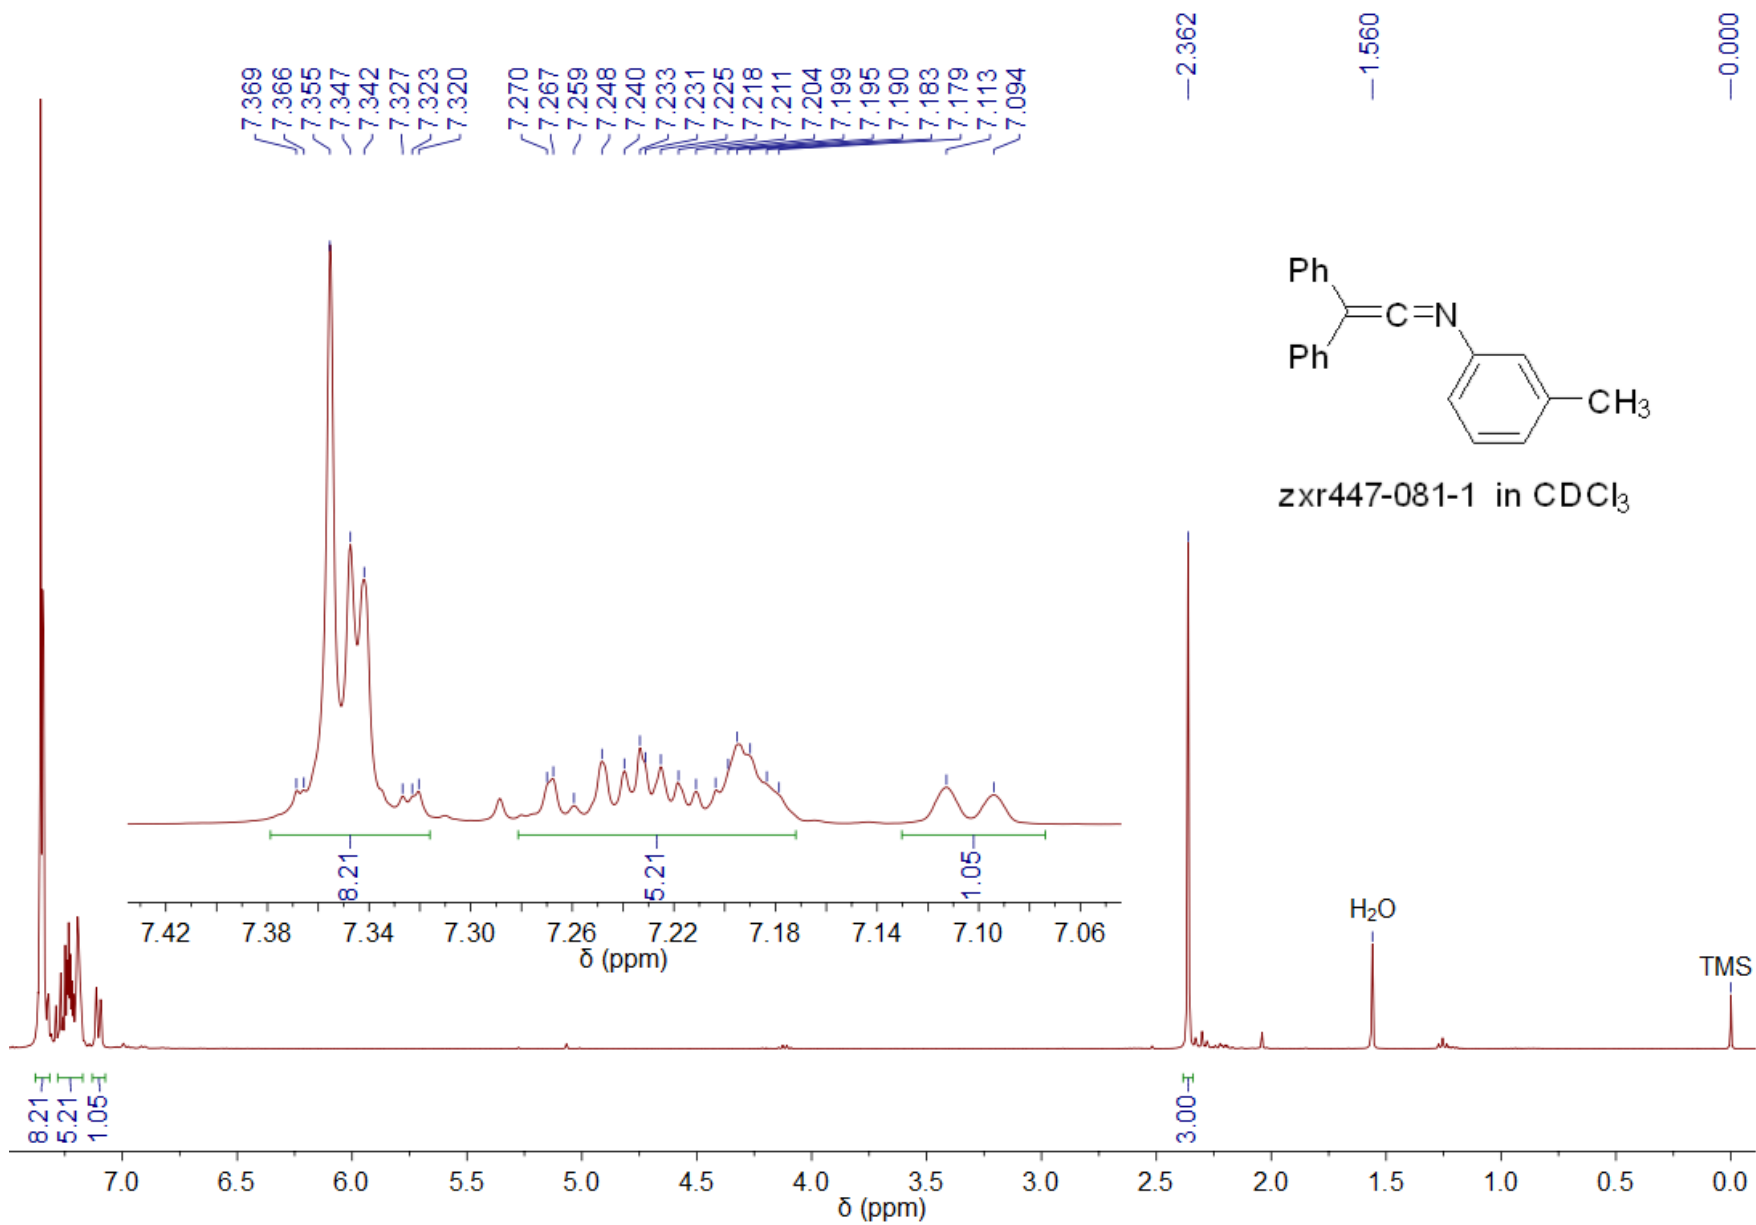

**2f** - <sup>1</sup>H NMR

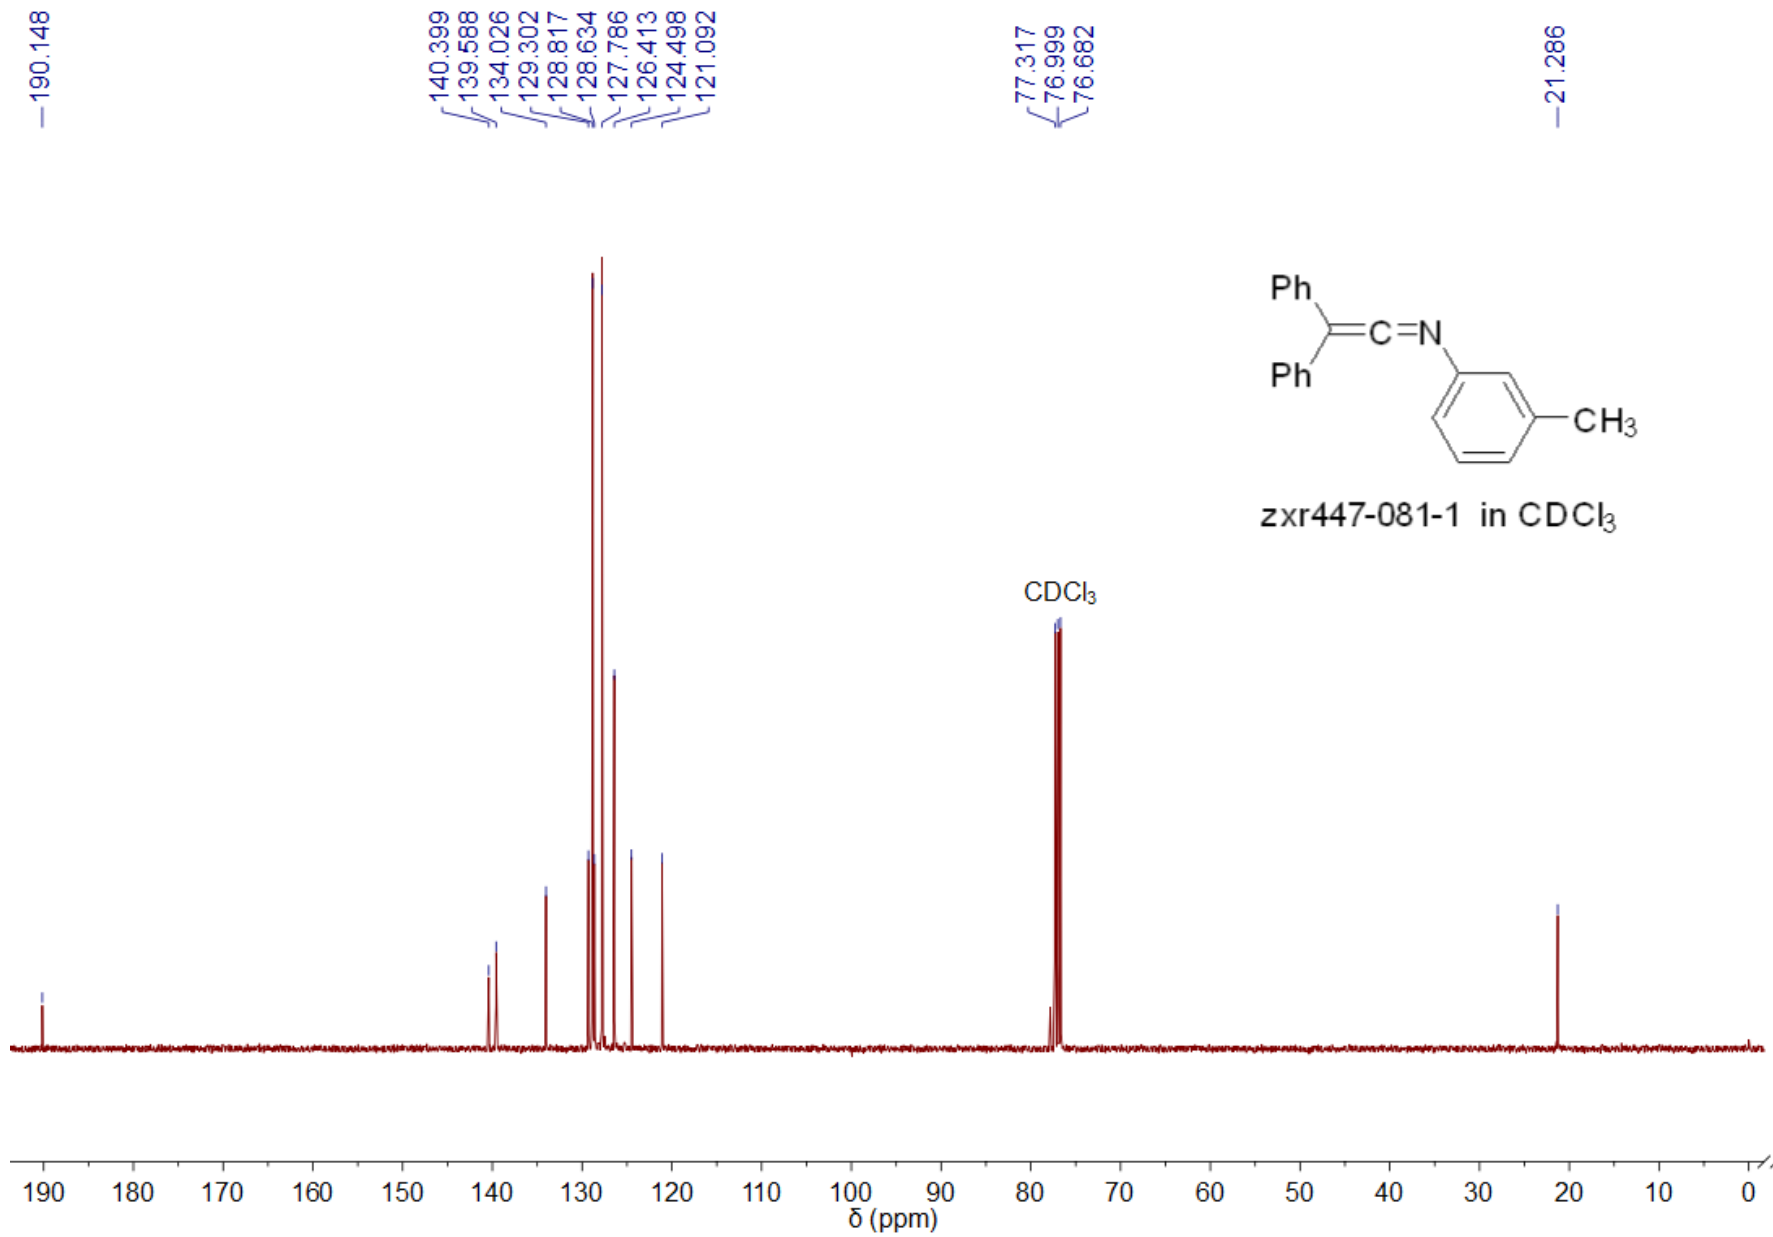

2f - <sup>13</sup>C NMR



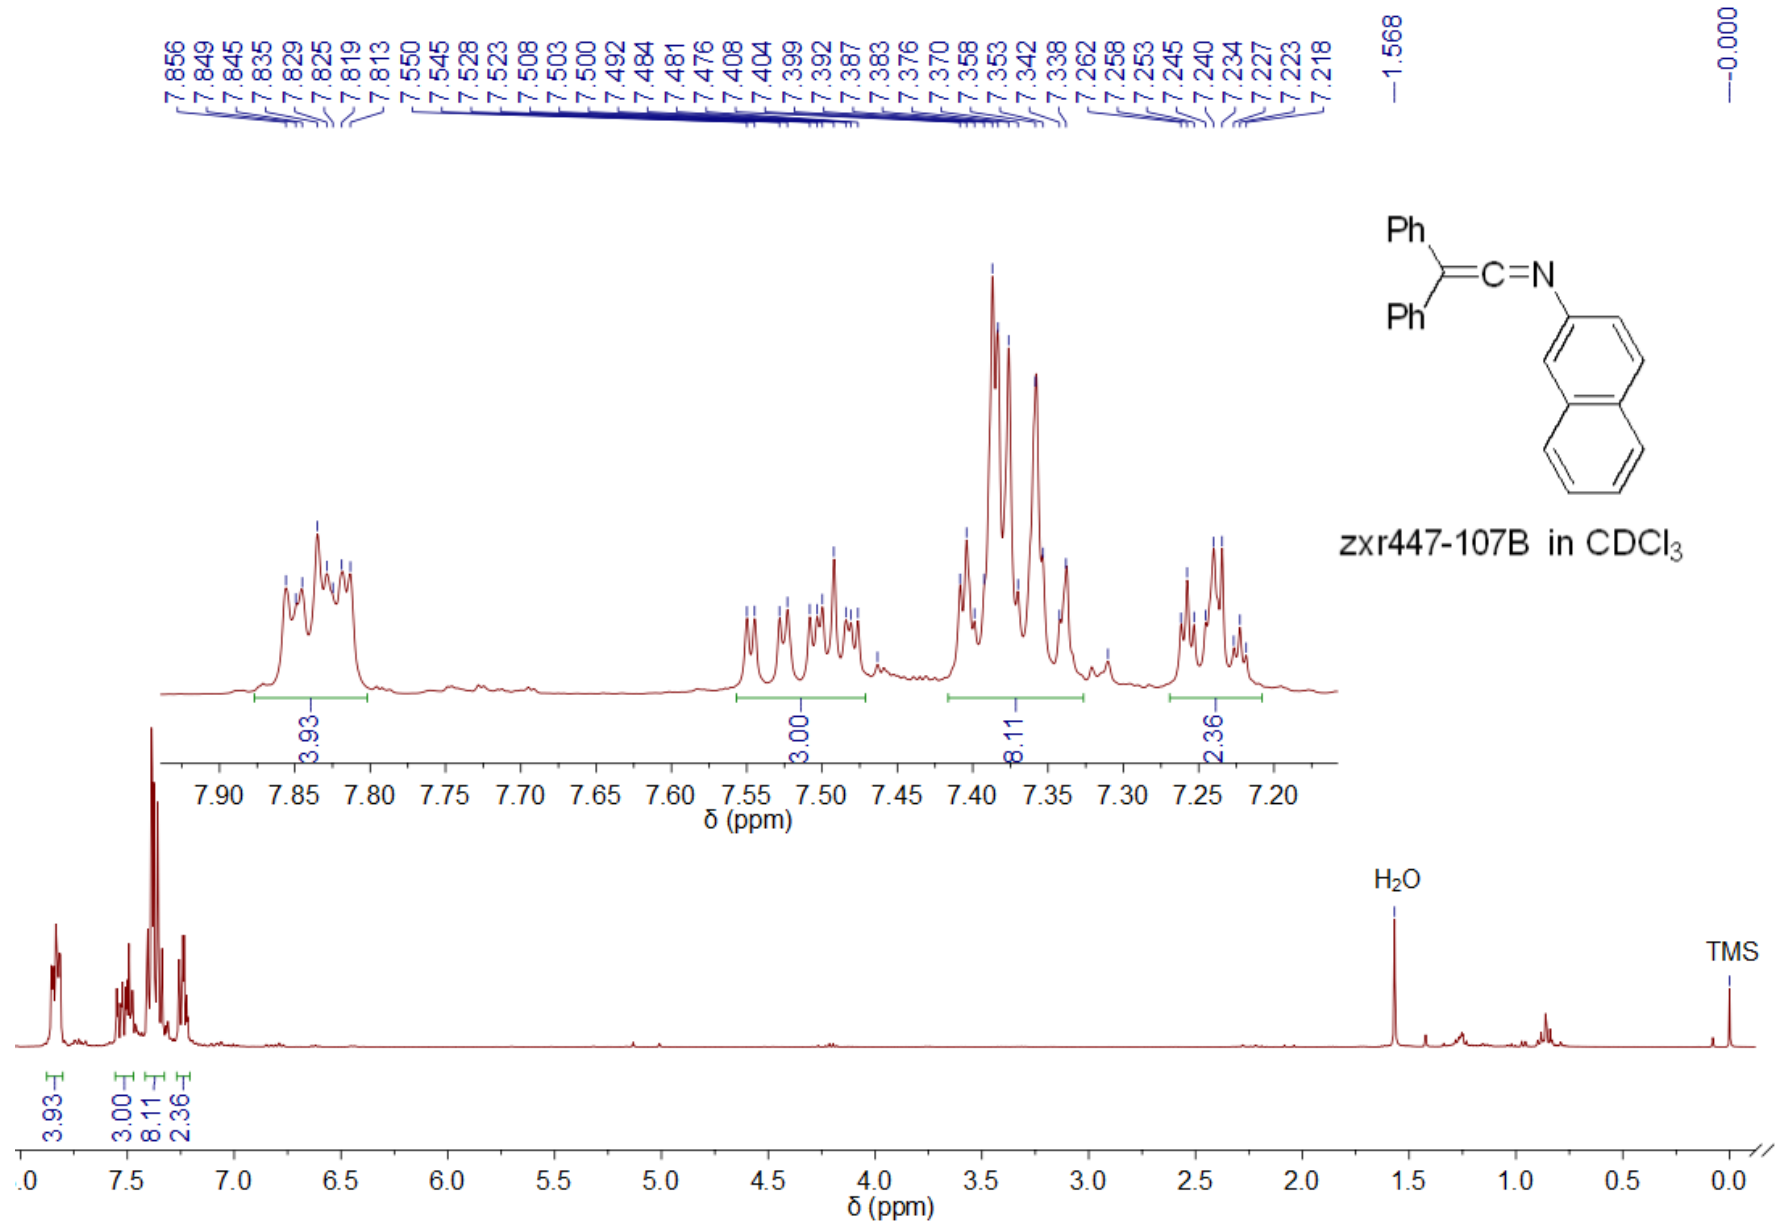

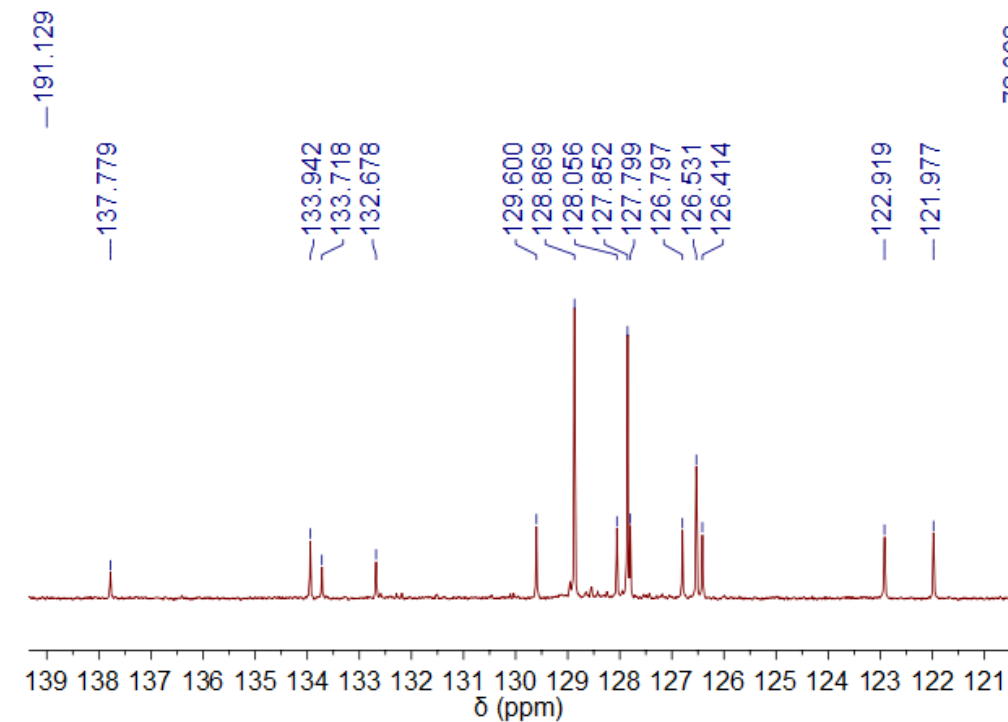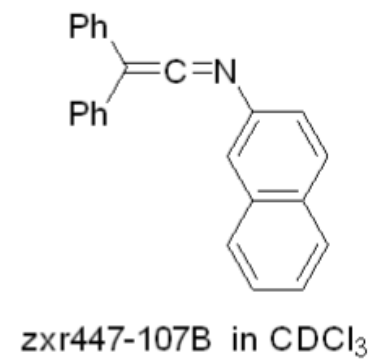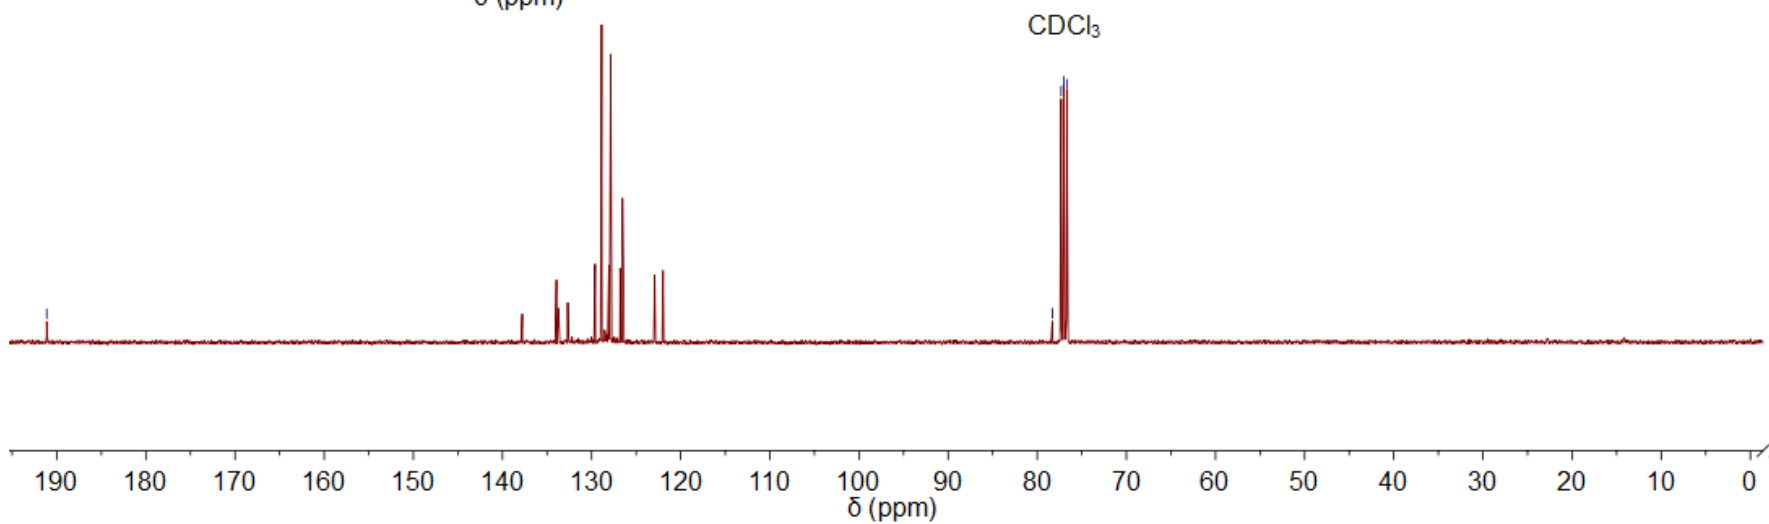

2g - <sup>13</sup>C NMR

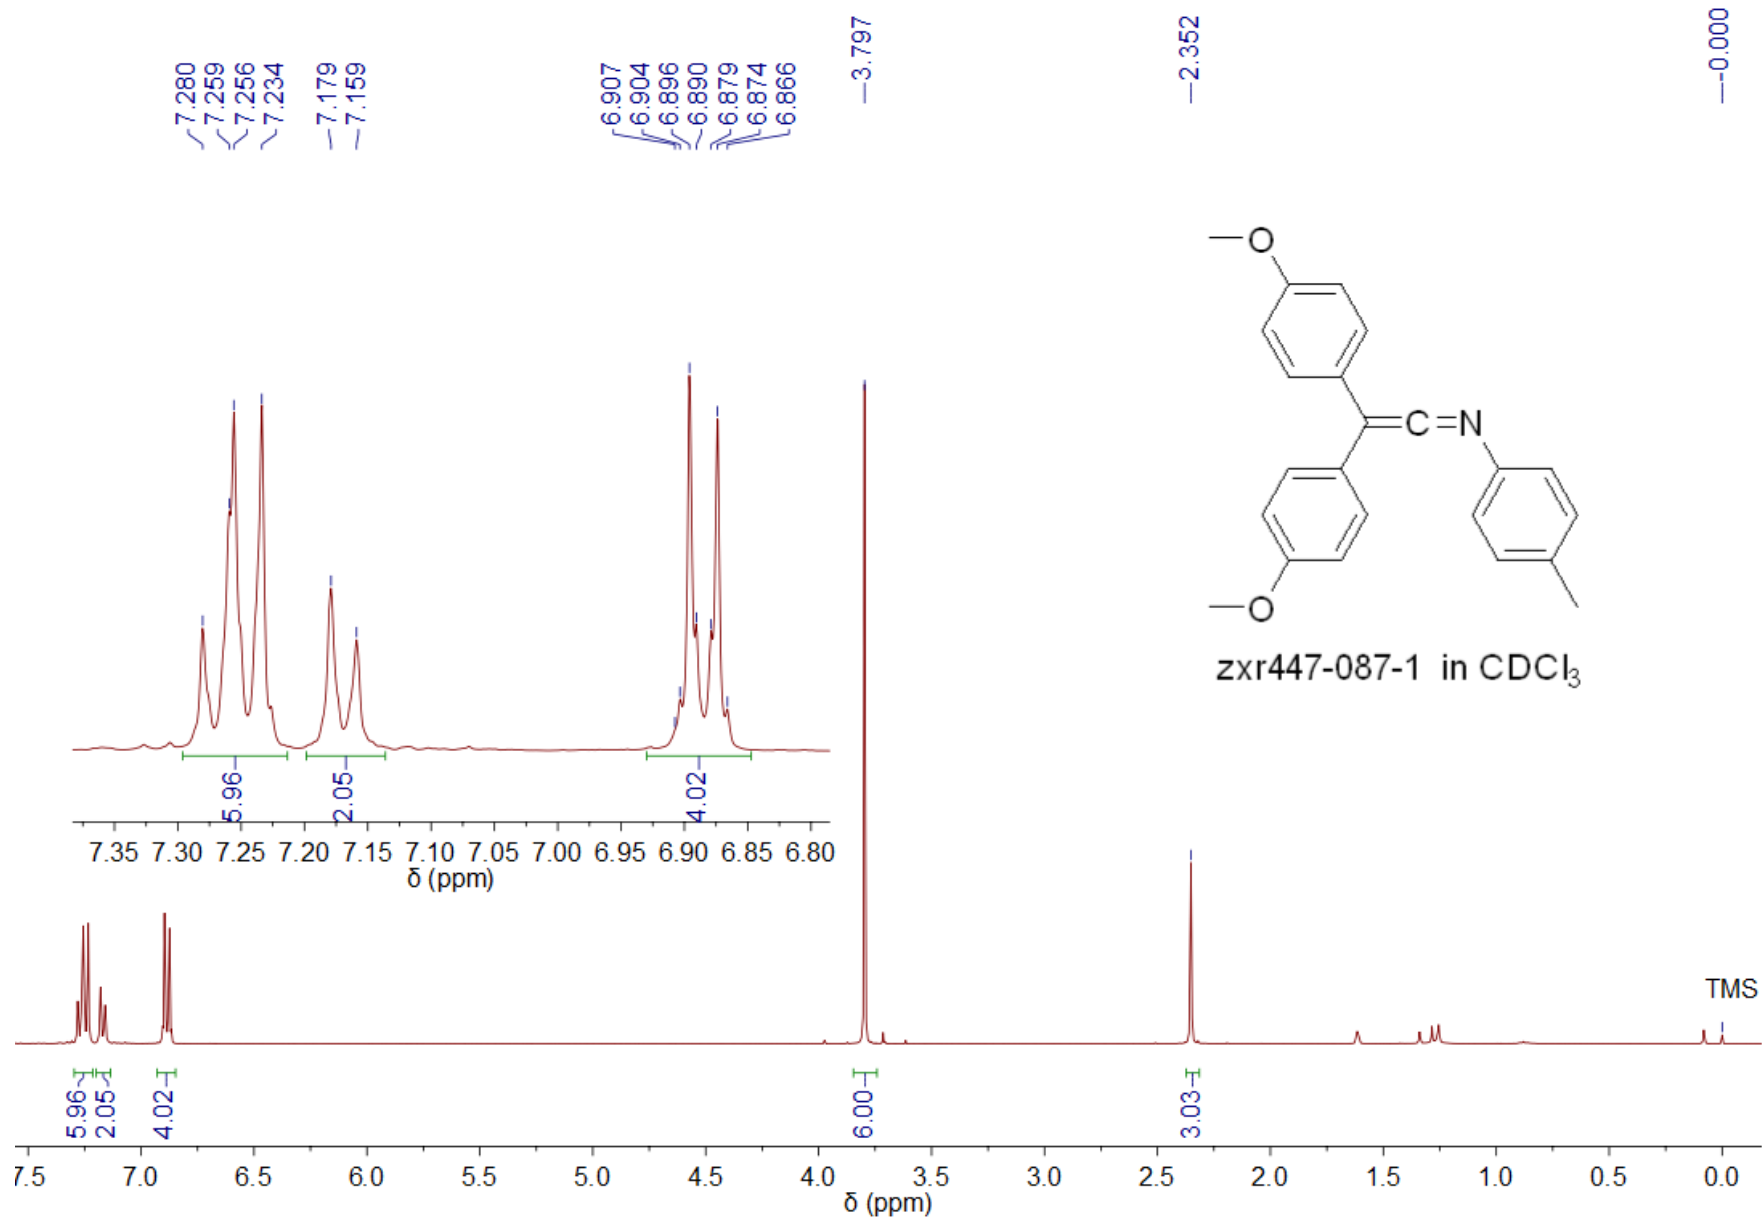

**2i** -  $^1\text{H}$  NMR

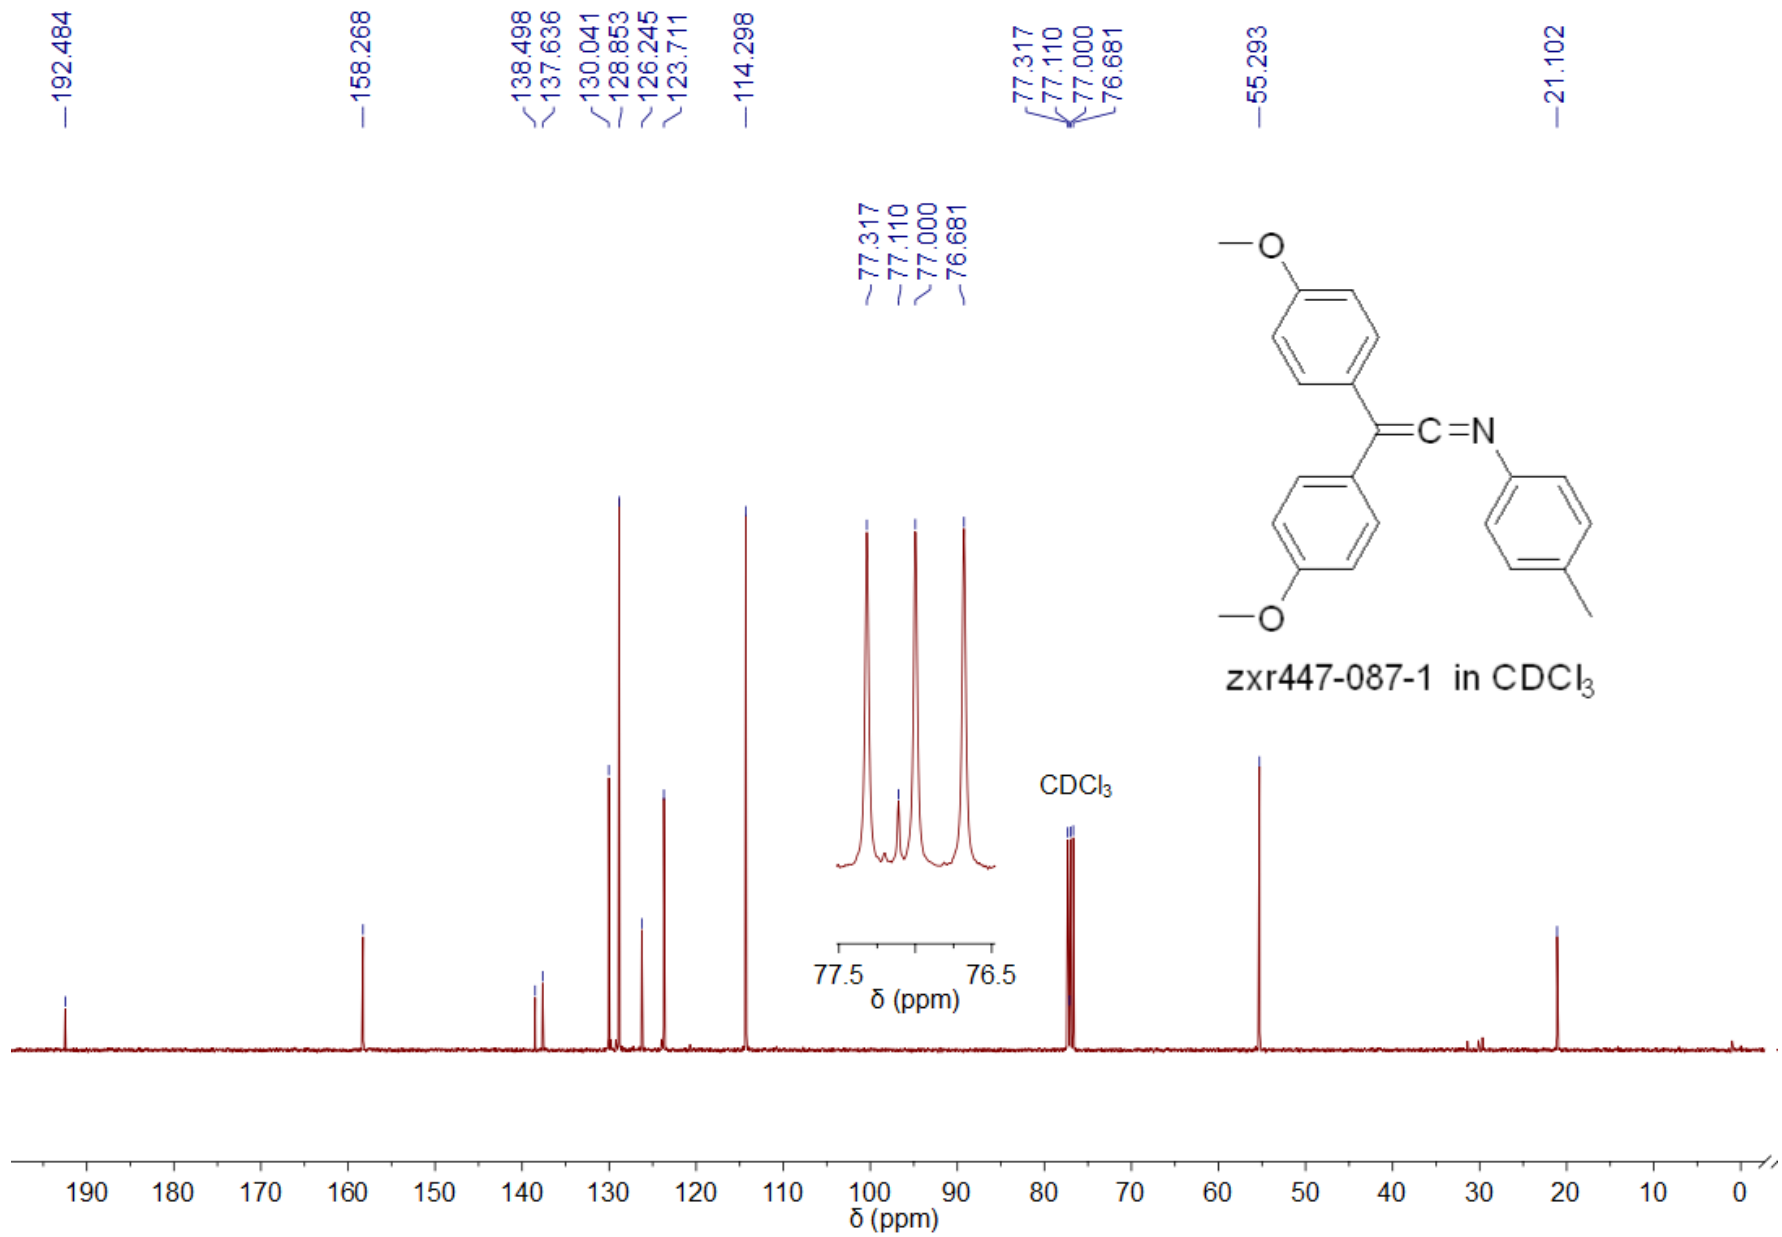

2i -  $^{13}\text{C}$  NMR

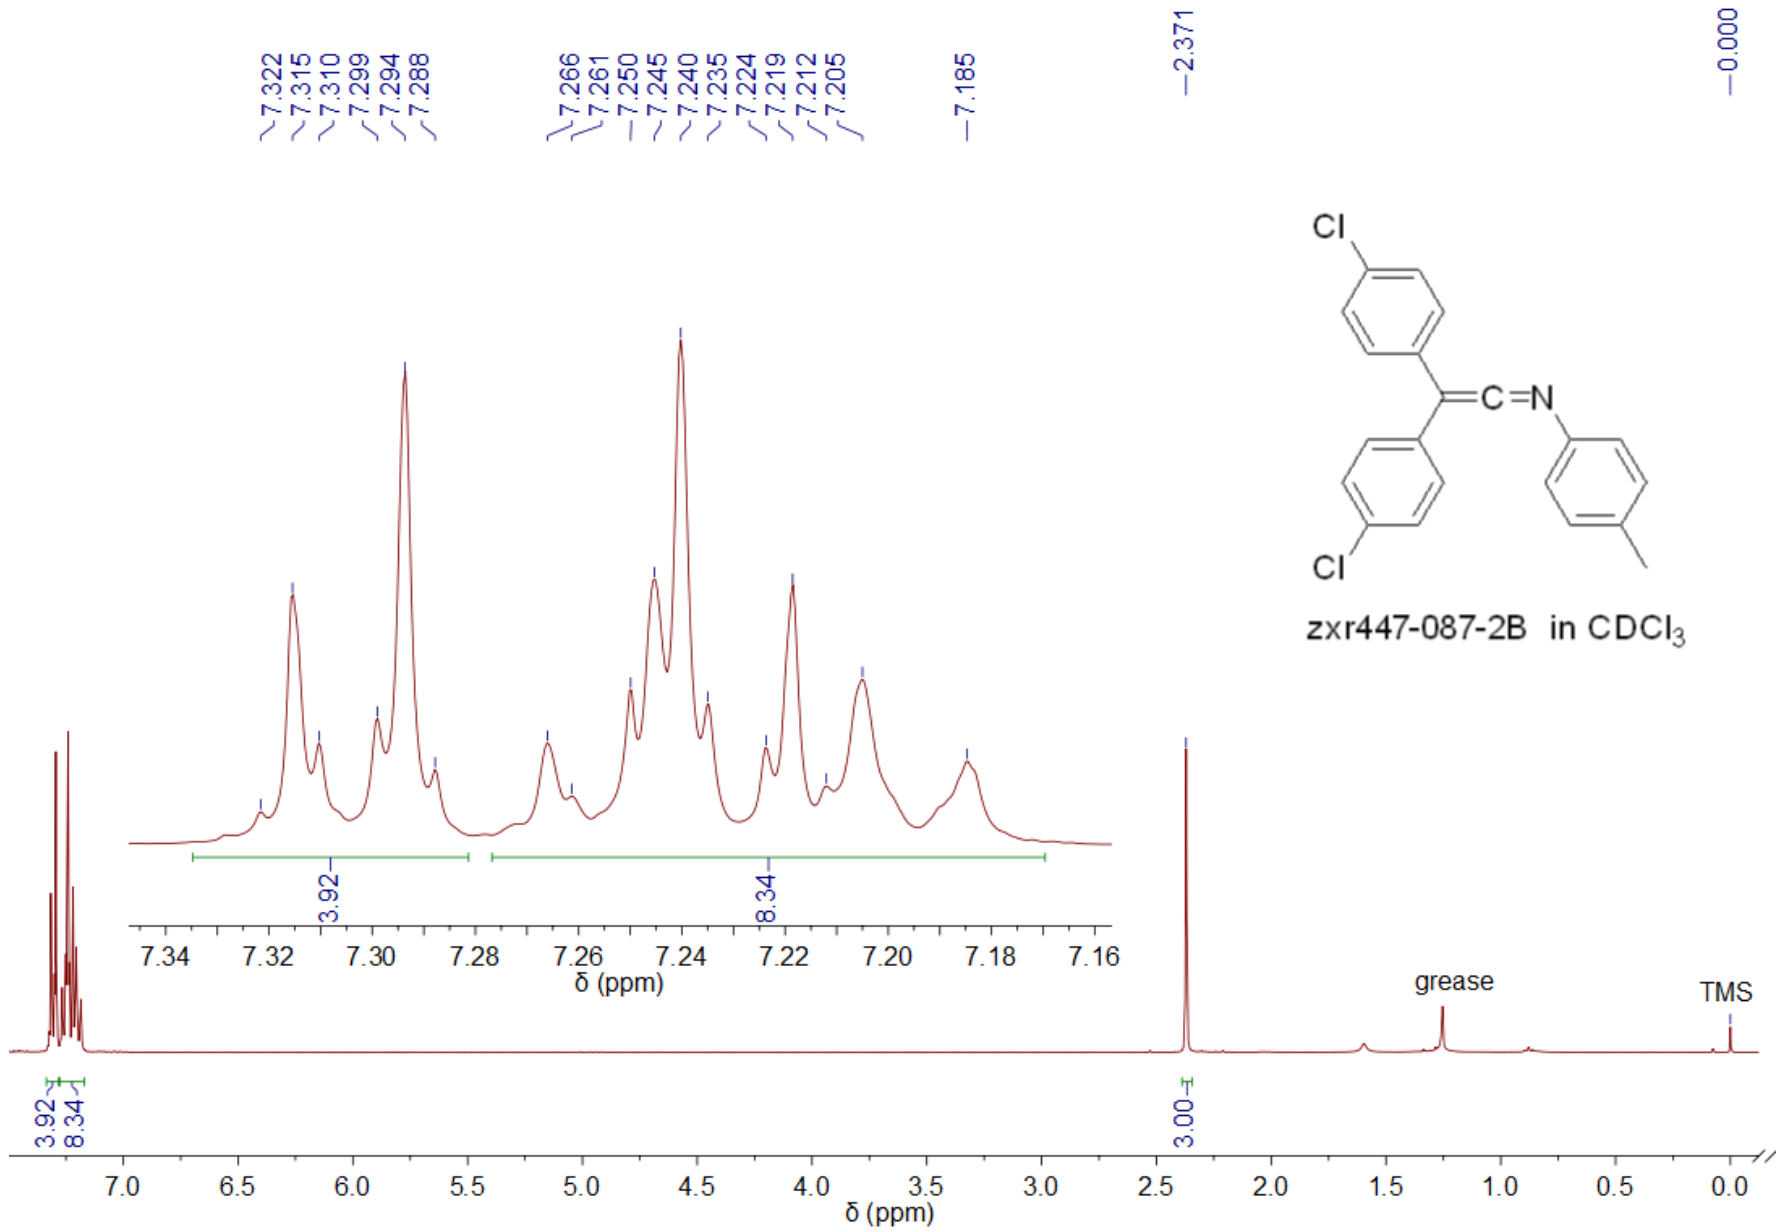

**2j** -  $^1\text{H}$  NMR

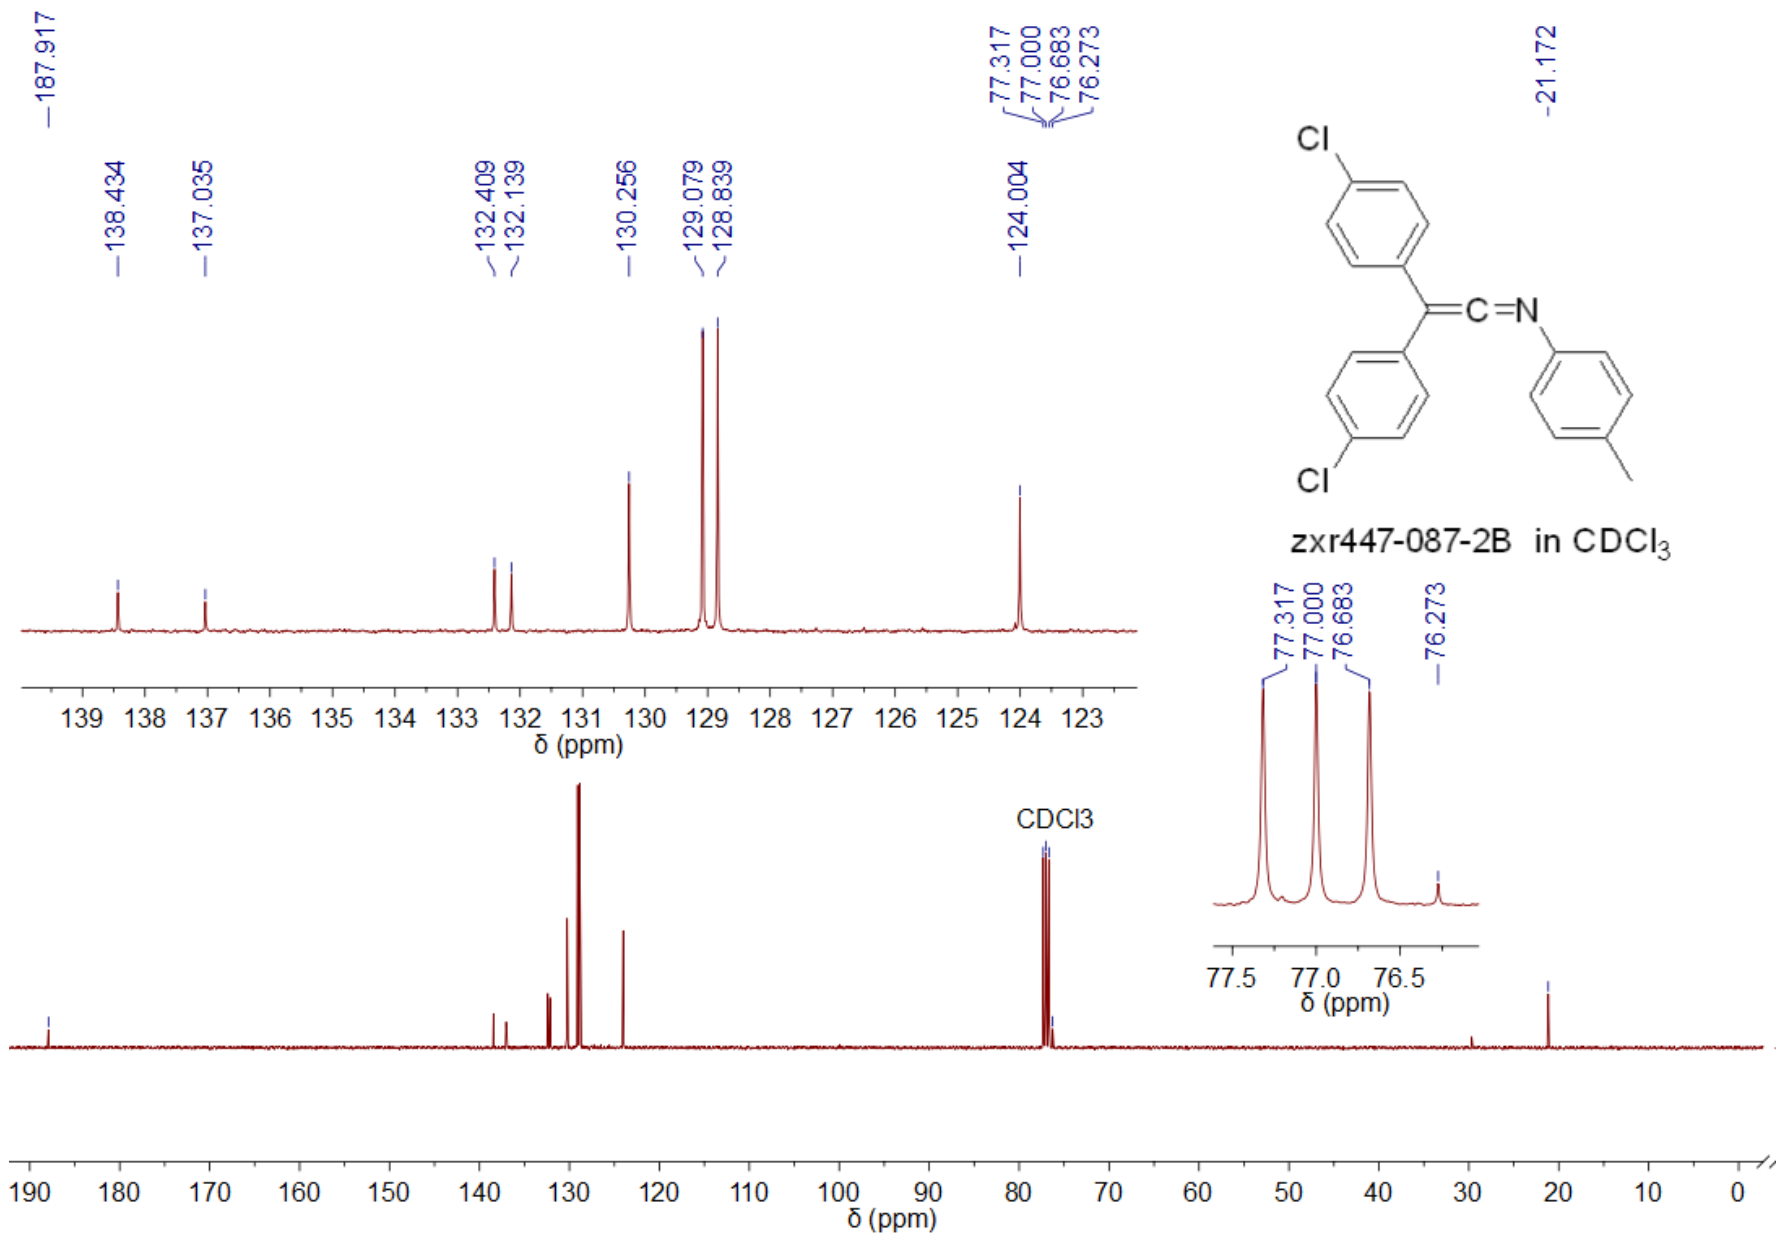

**2j** -  $^{13}\text{C}$  NMR

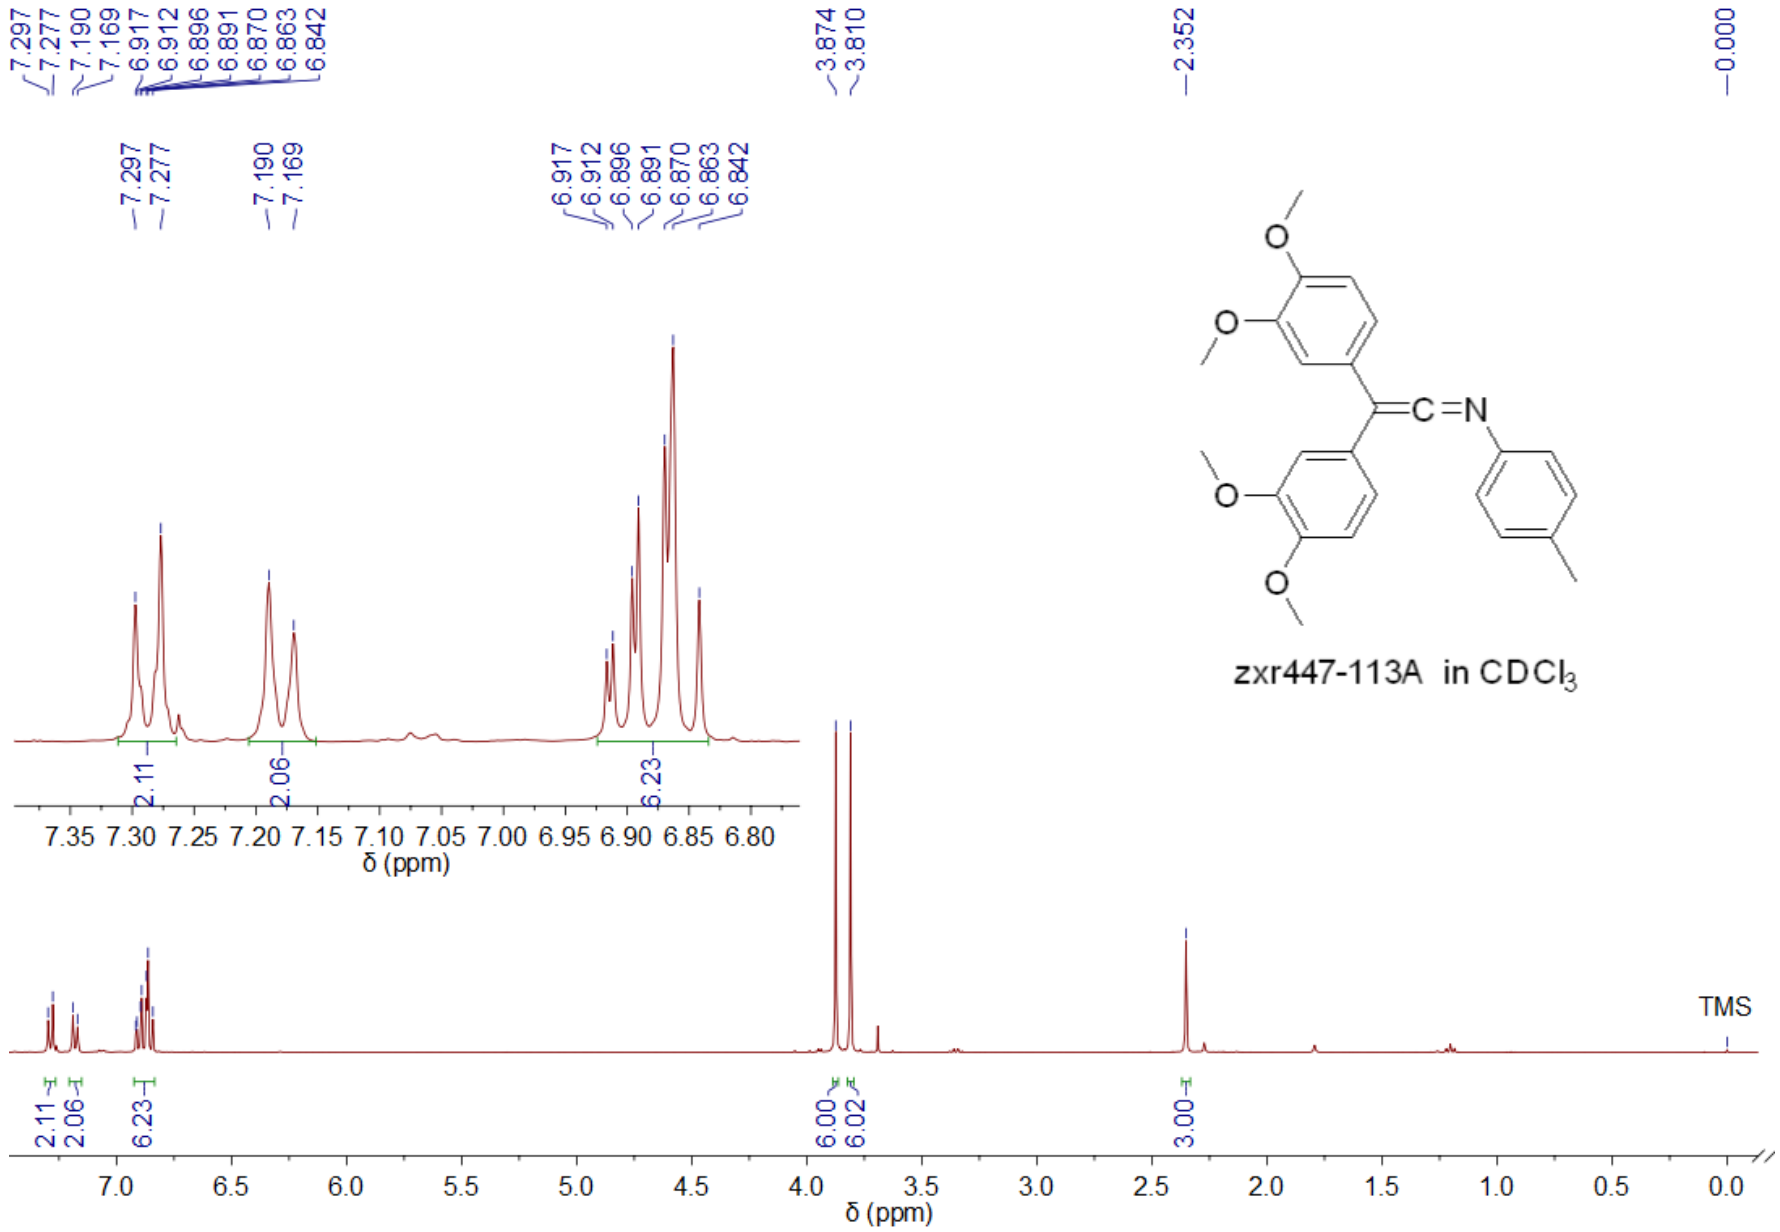

**2k** - <sup>1</sup>H NMR

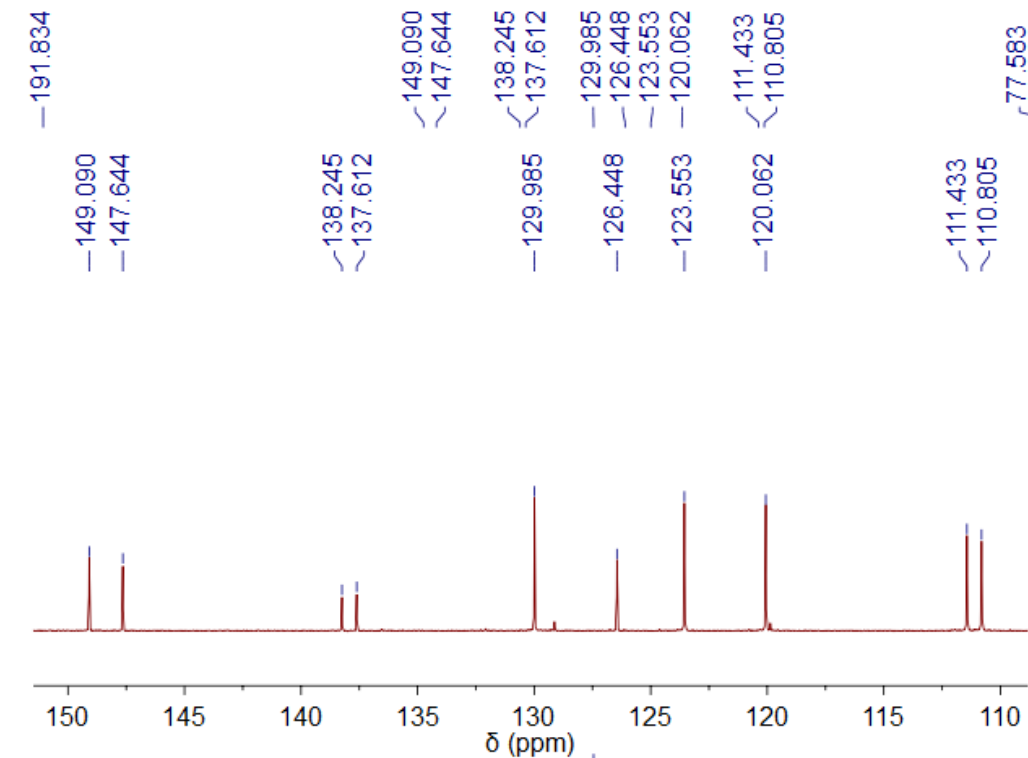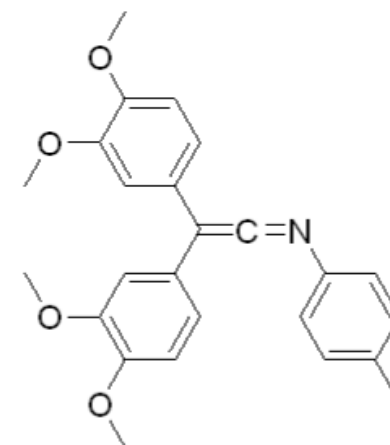

**zxr447-113A** in  $\text{CDCl}_3$

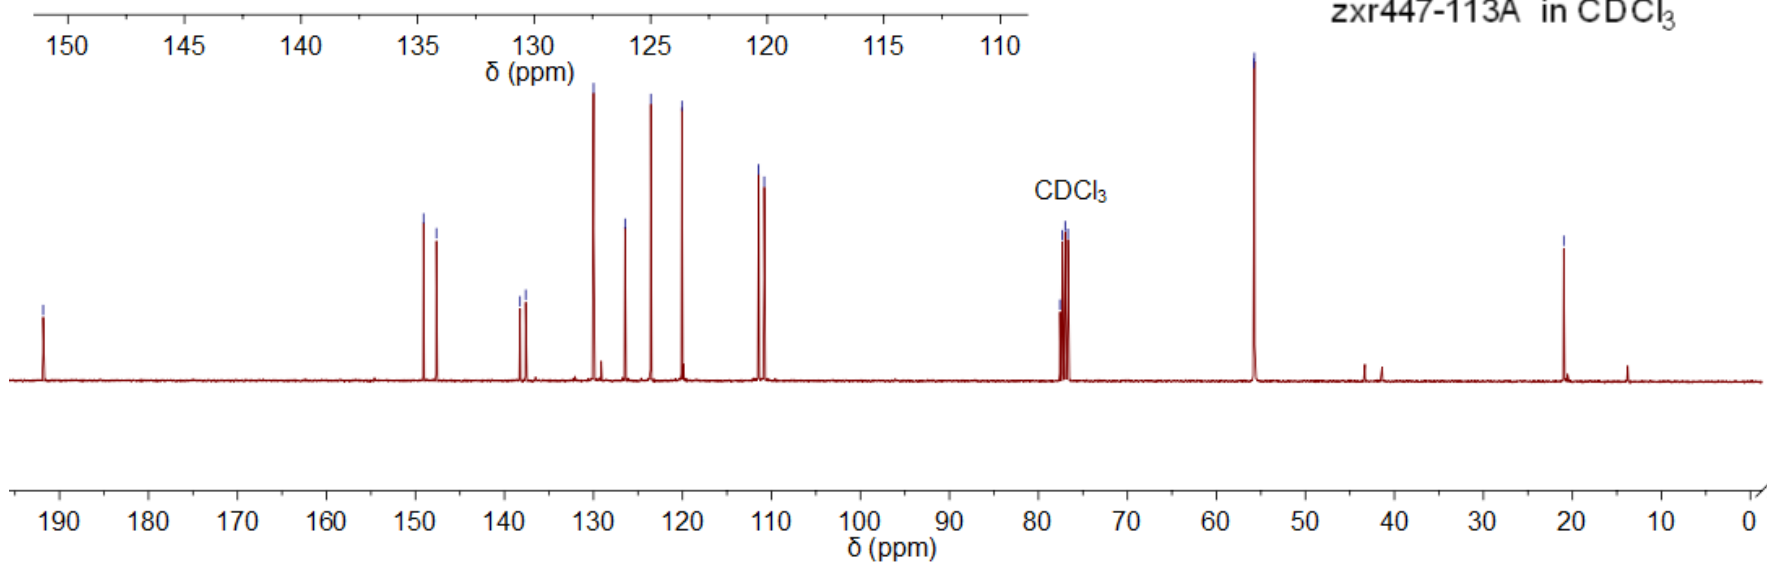

**2k** -  $^{13}\text{C}$  NMR



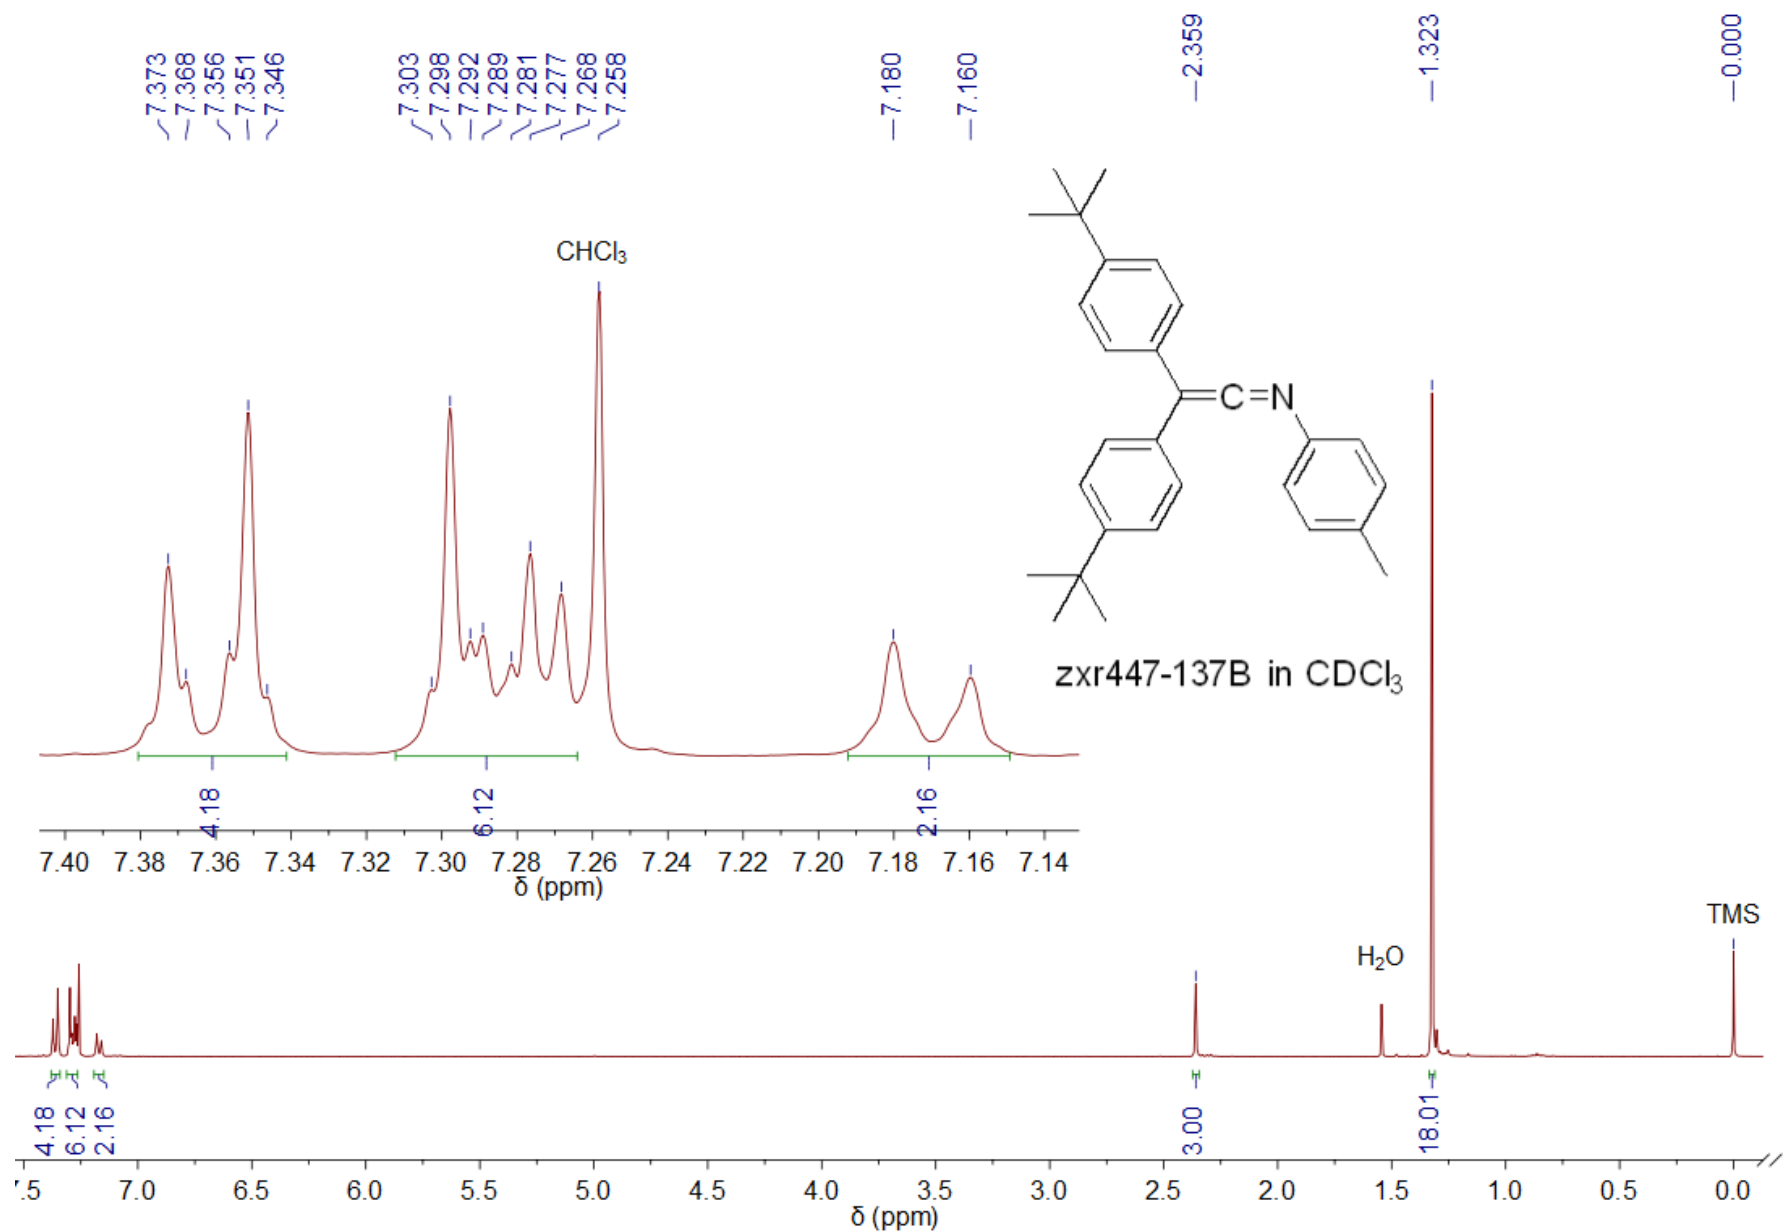

**2I** - <sup>1</sup>H NMR

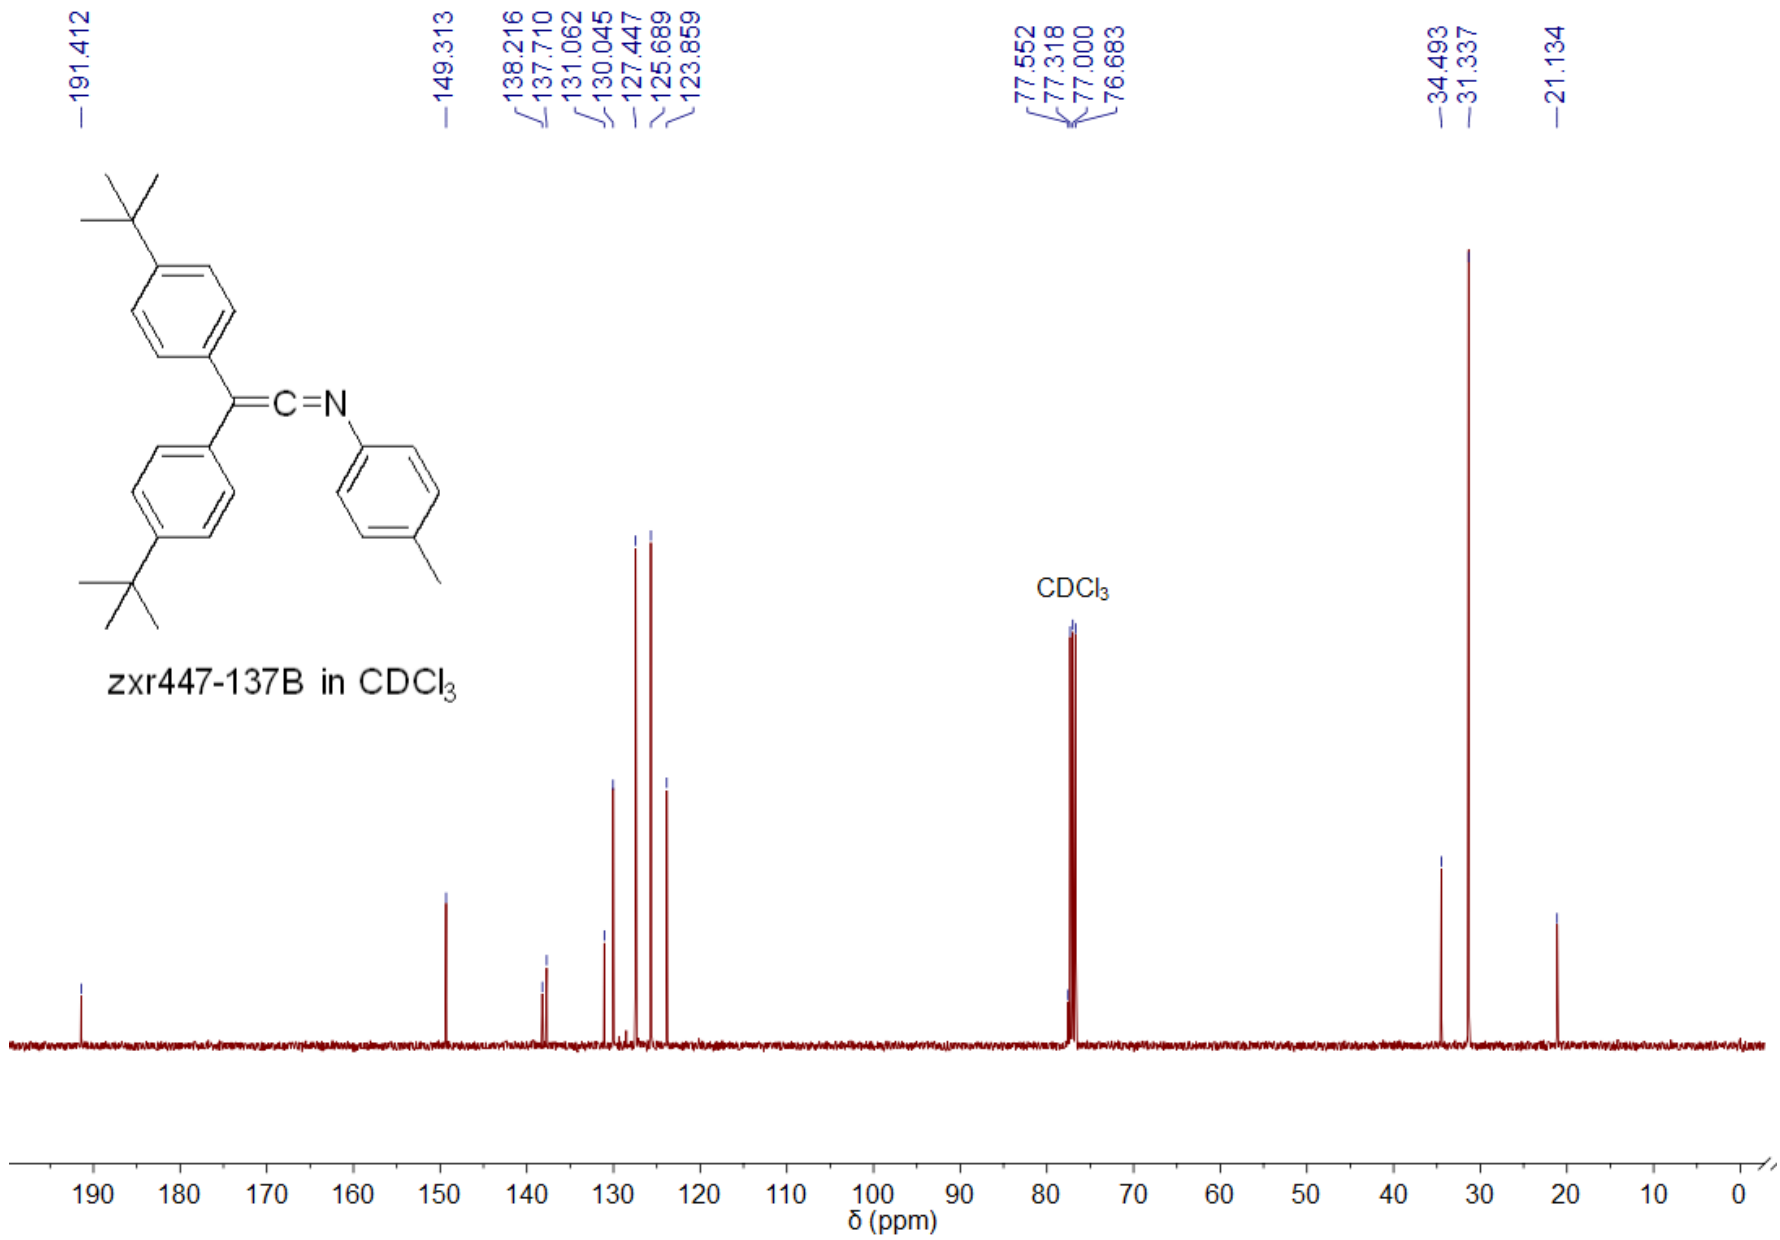

2I - <sup>13</sup>C NMR

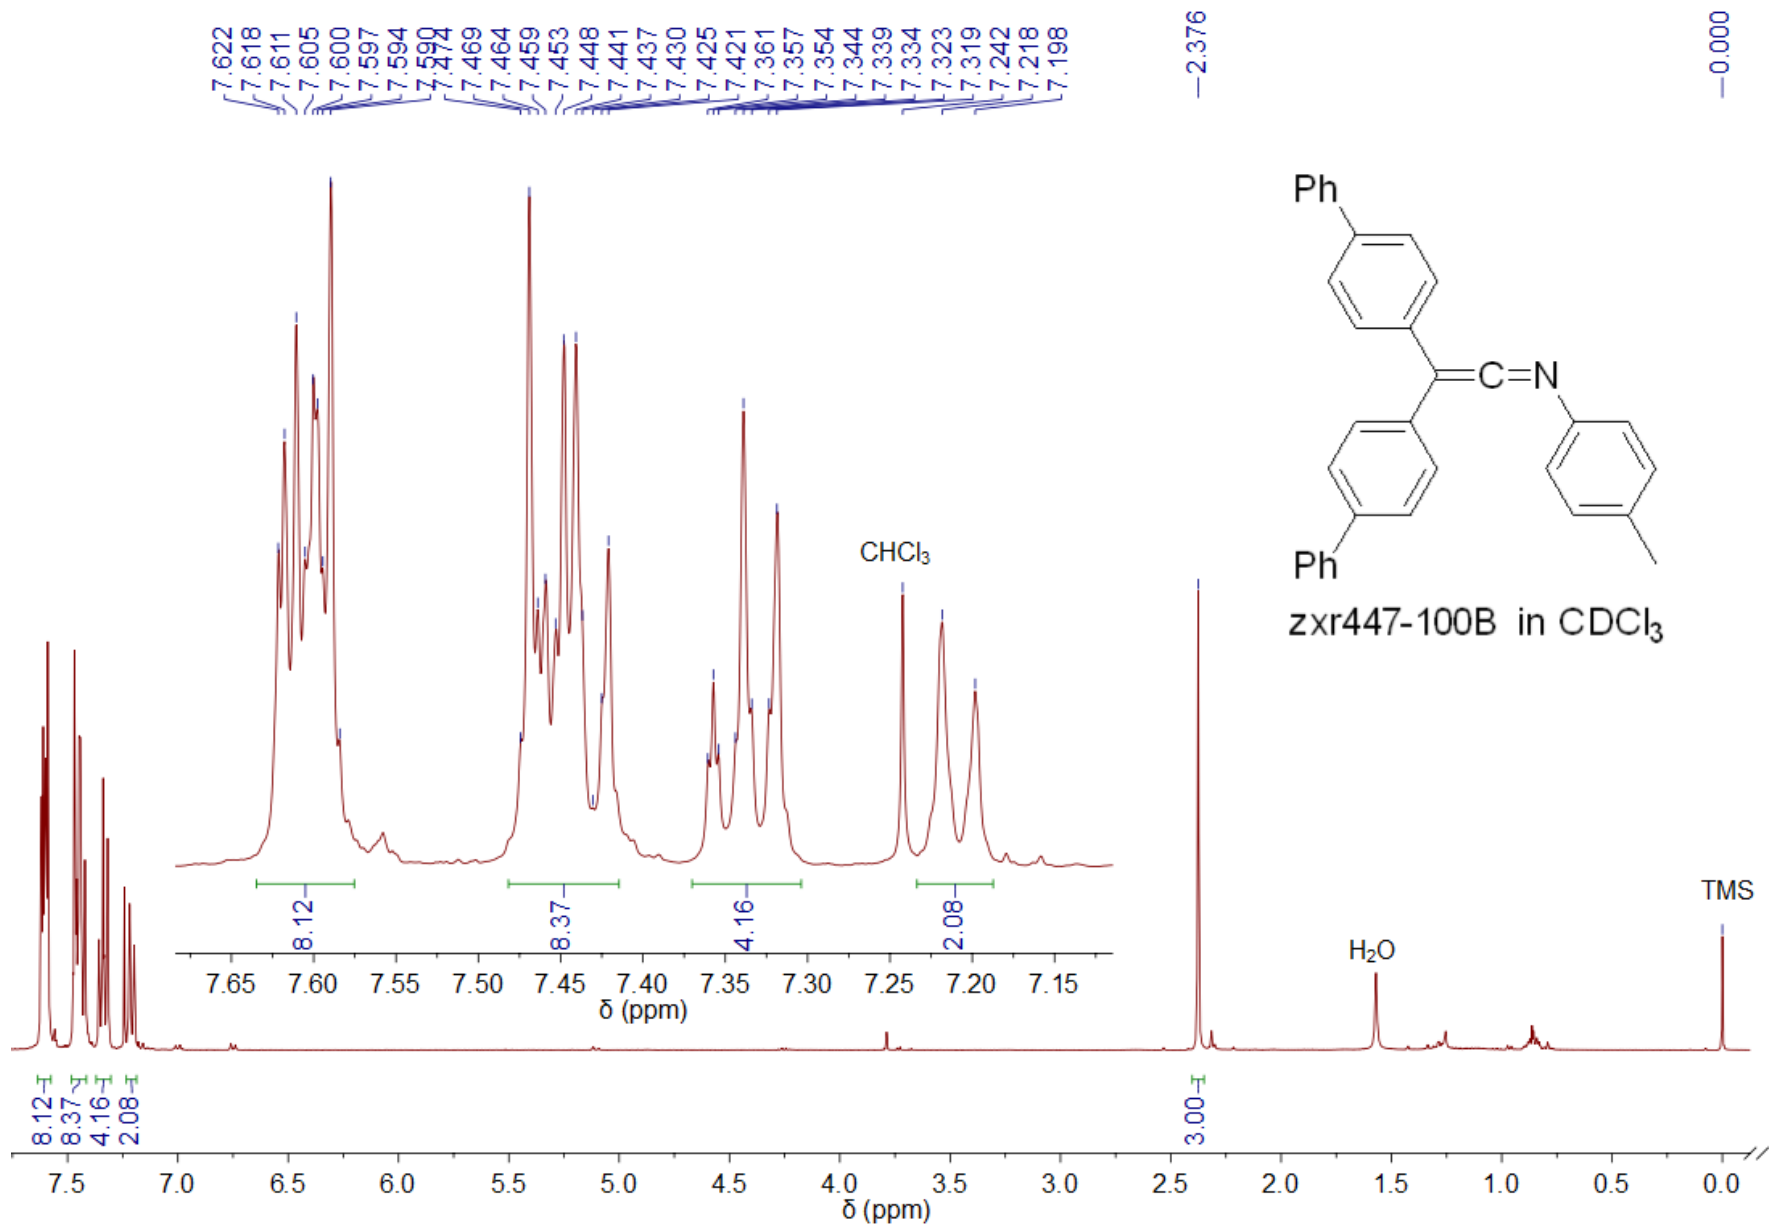

**2n** -  $^1\text{H NMR}$

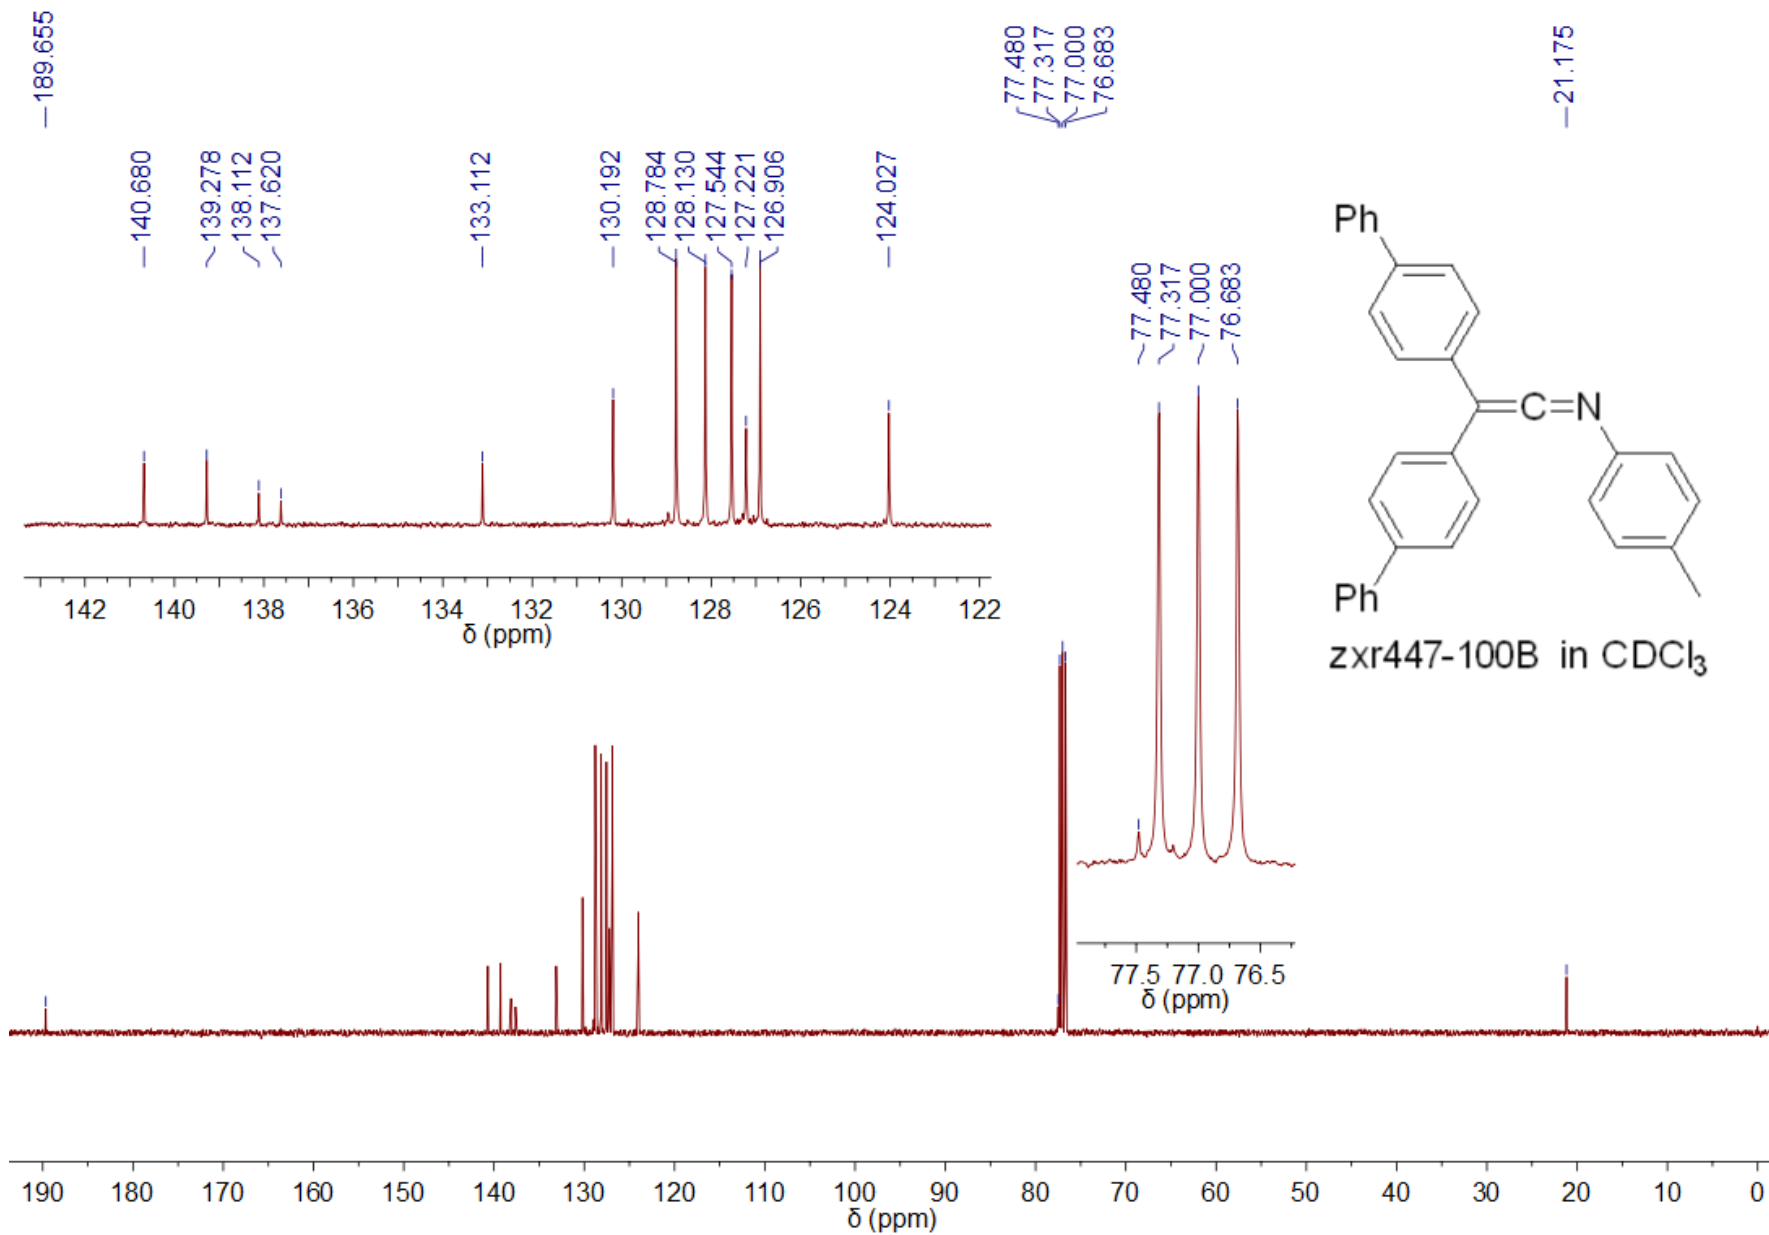

**2n** -  $^{13}\text{C}$  NMR

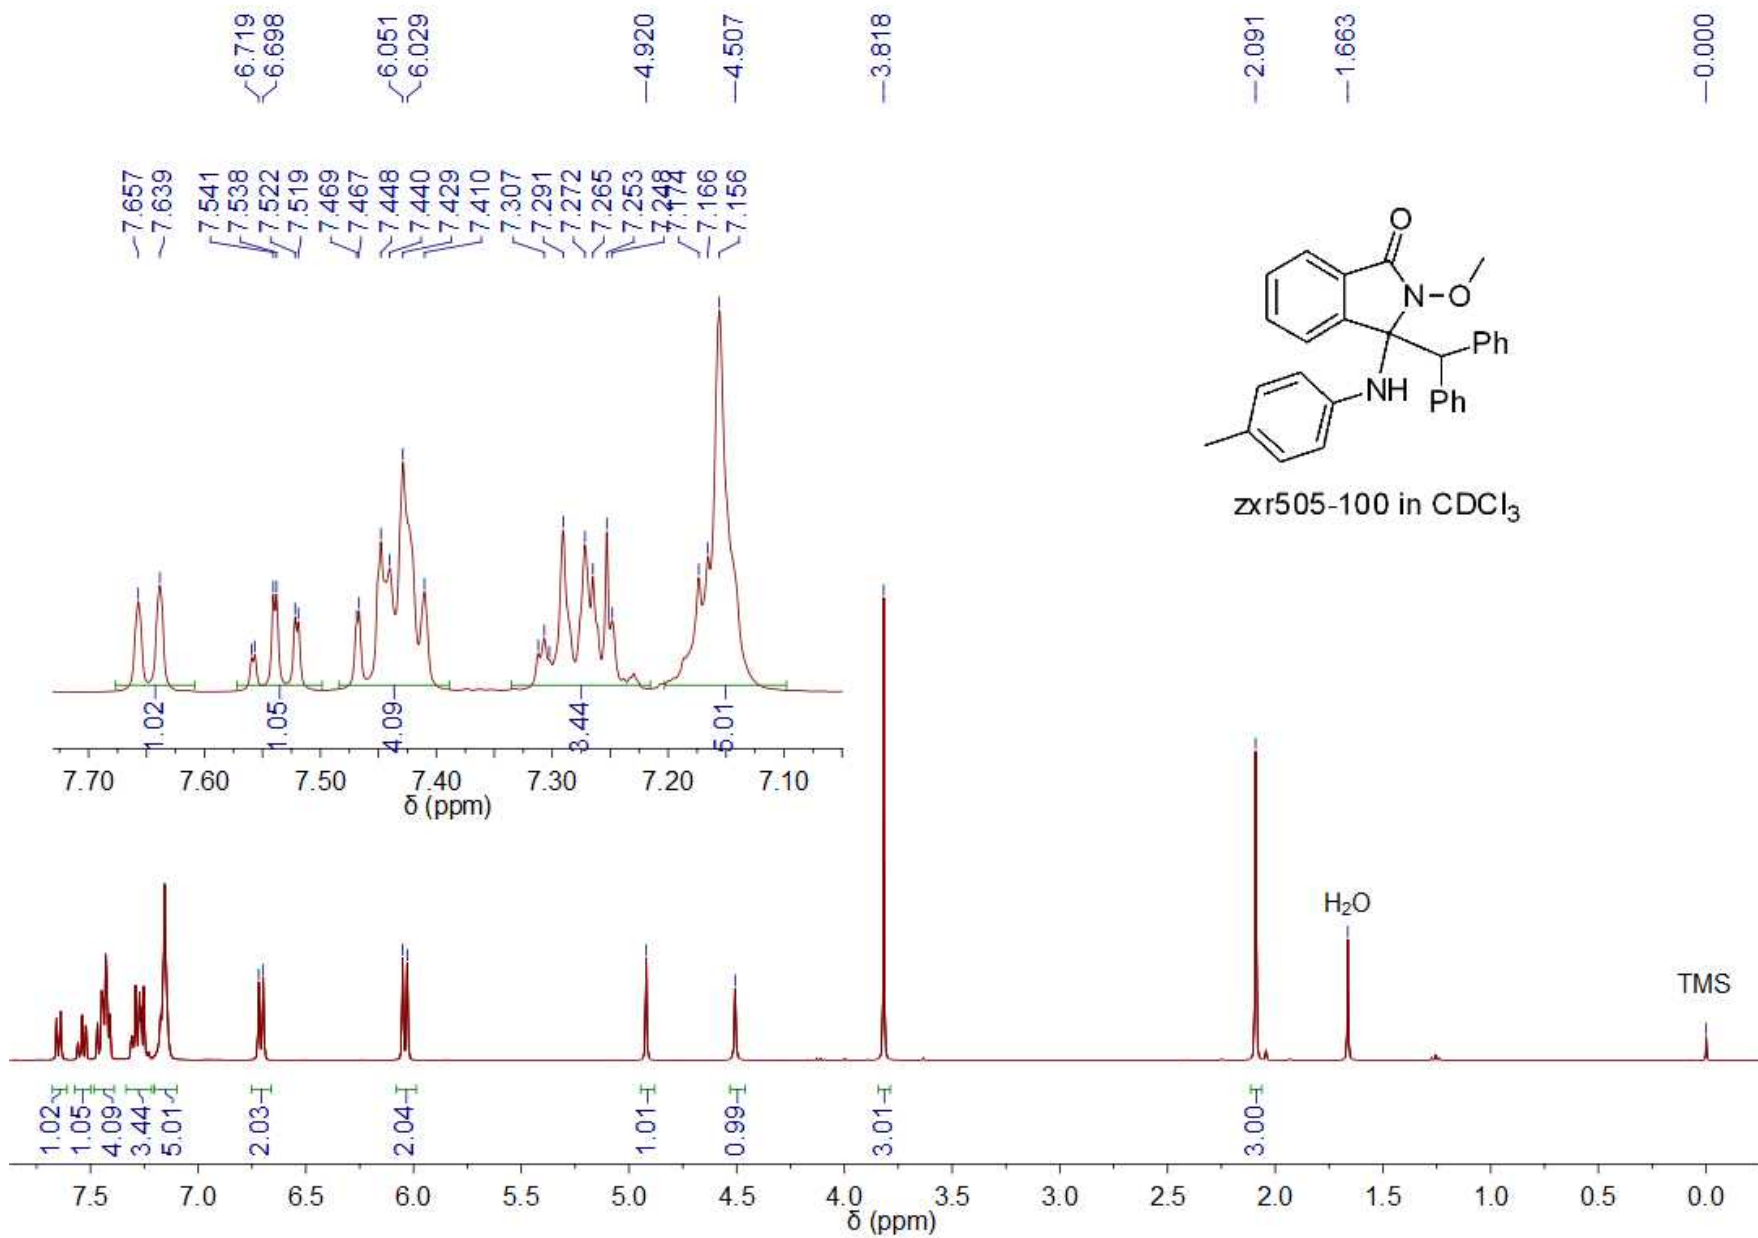

**3a** -  $^1\text{H}$  NMR

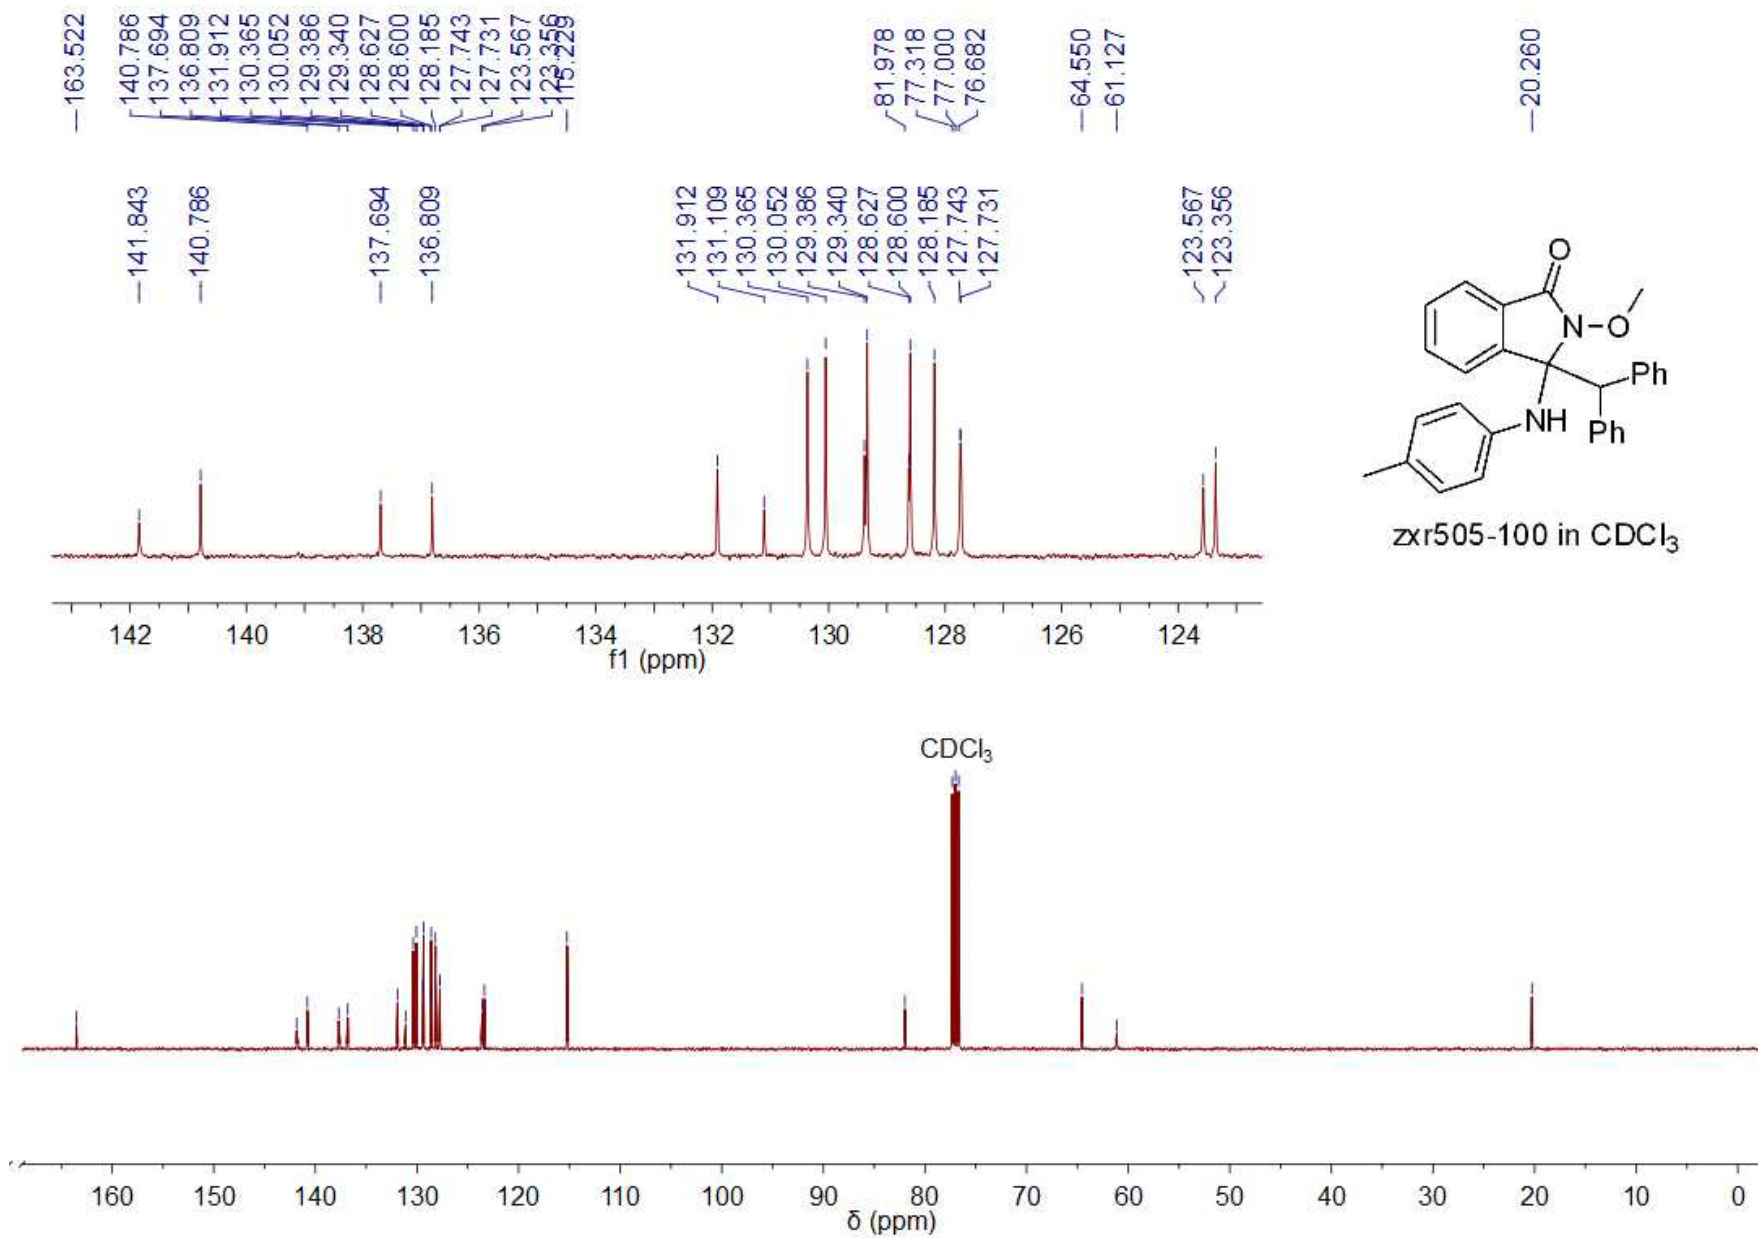

**3a** –  $^{13}\text{C}$  NMR

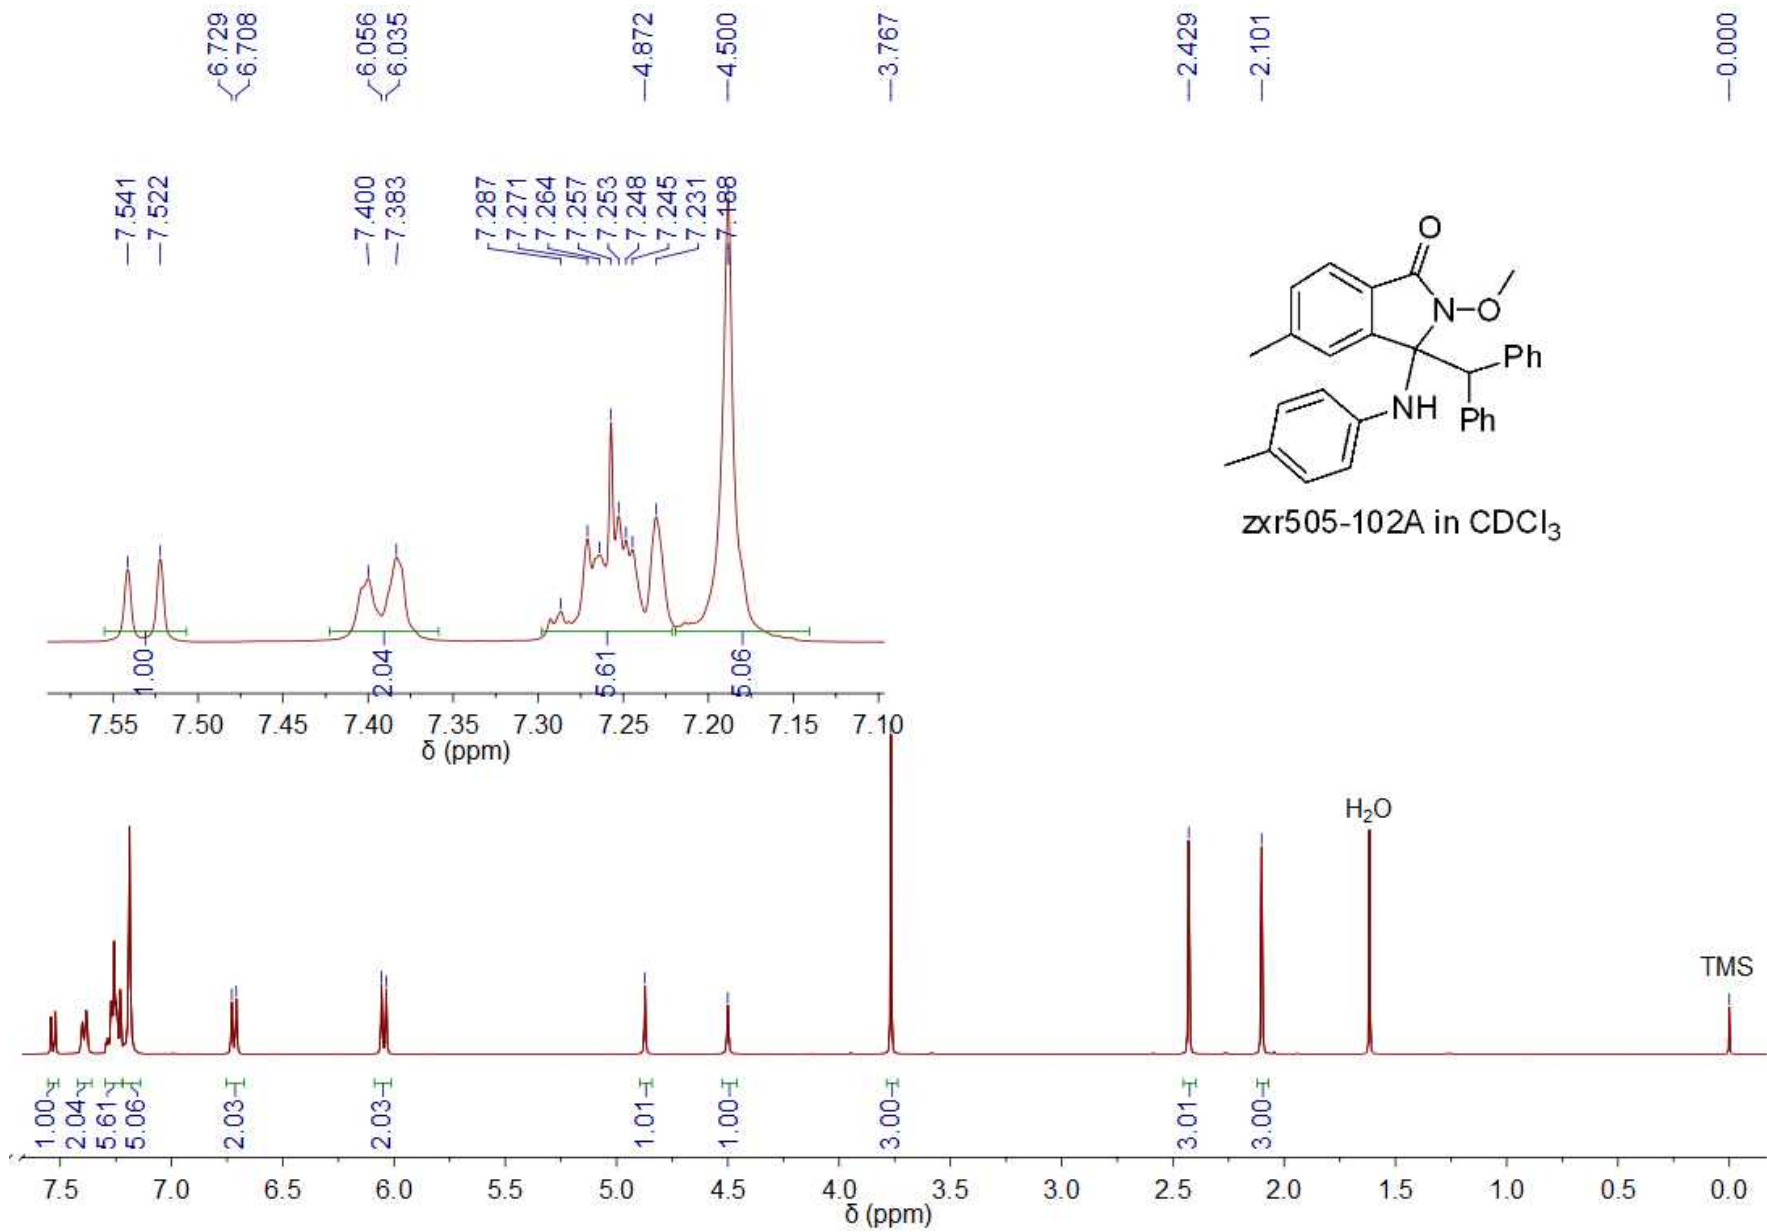

**3b** - <sup>1</sup>H NMR

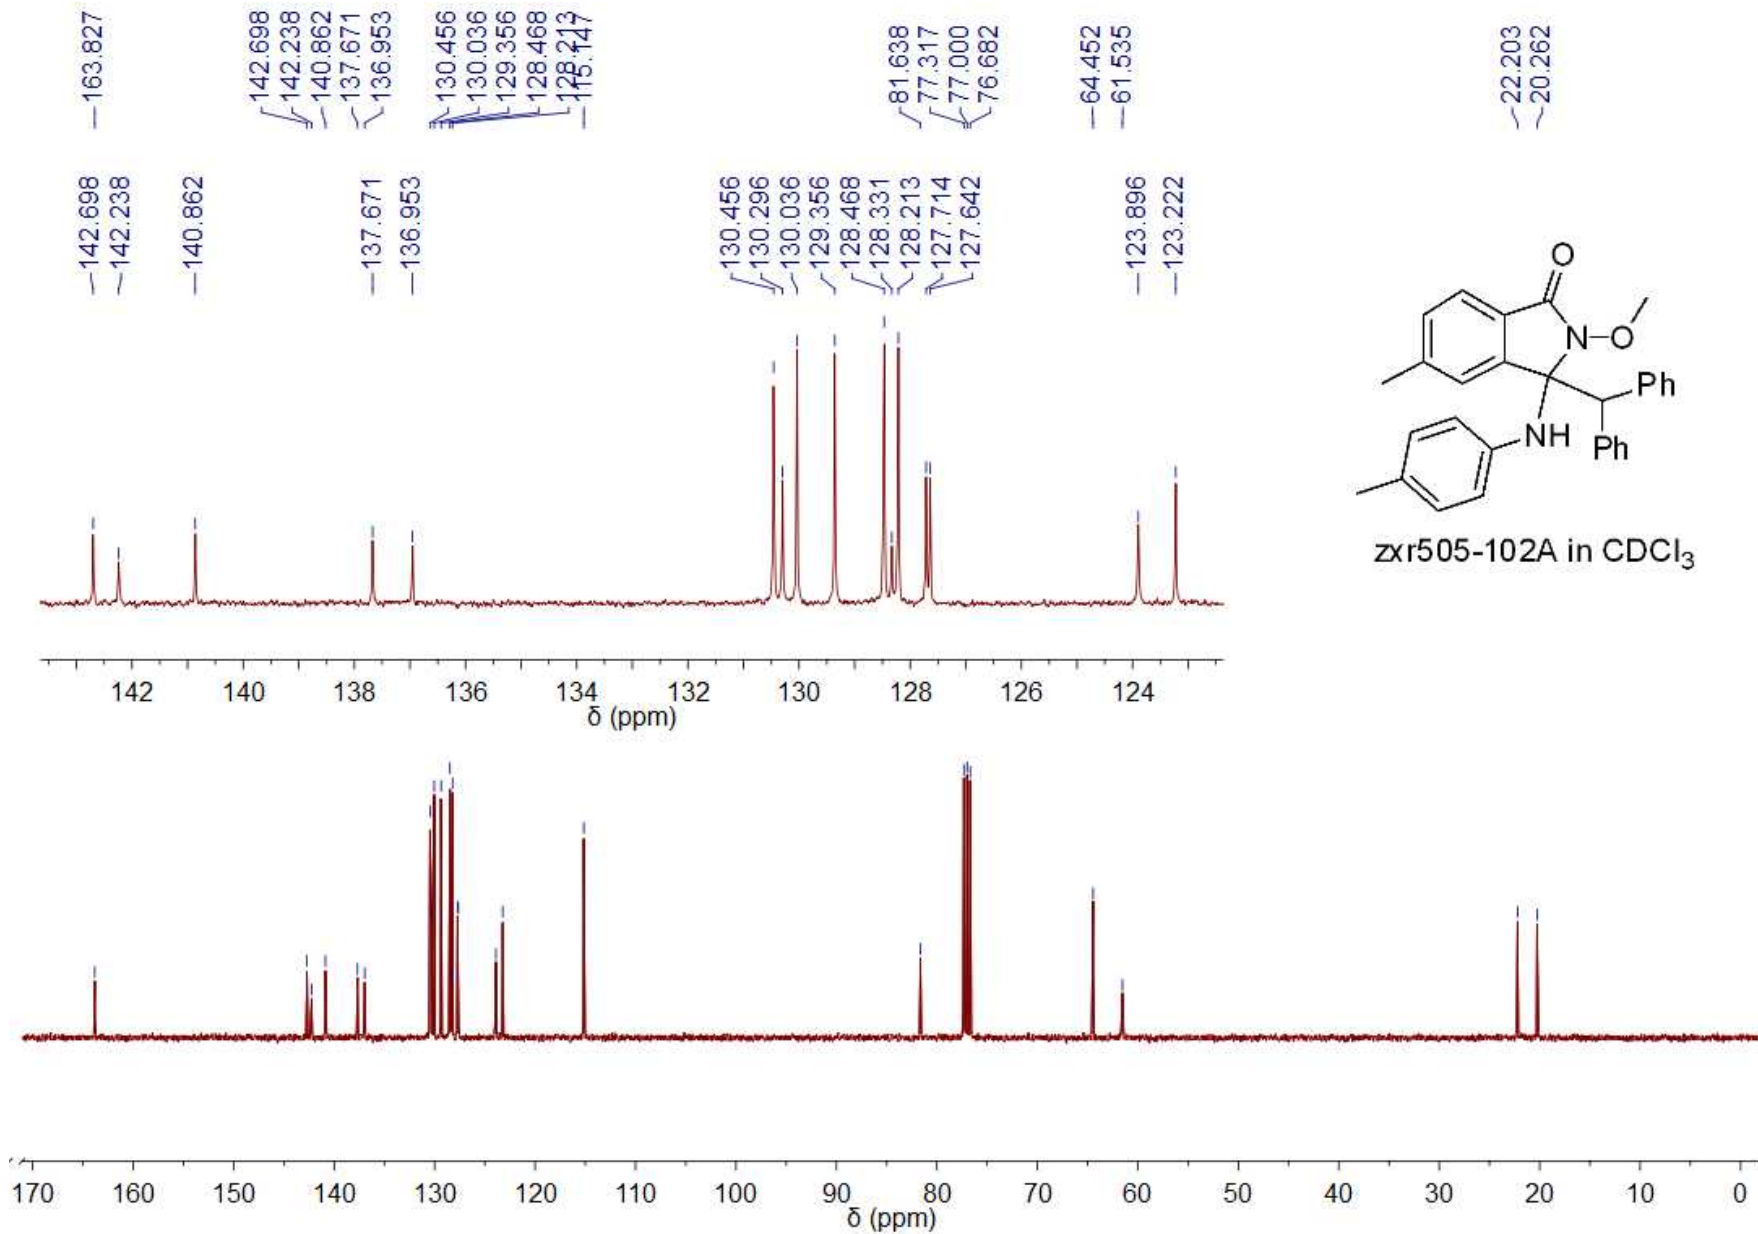

**3b** -  $^{13}\text{C}$  NMR



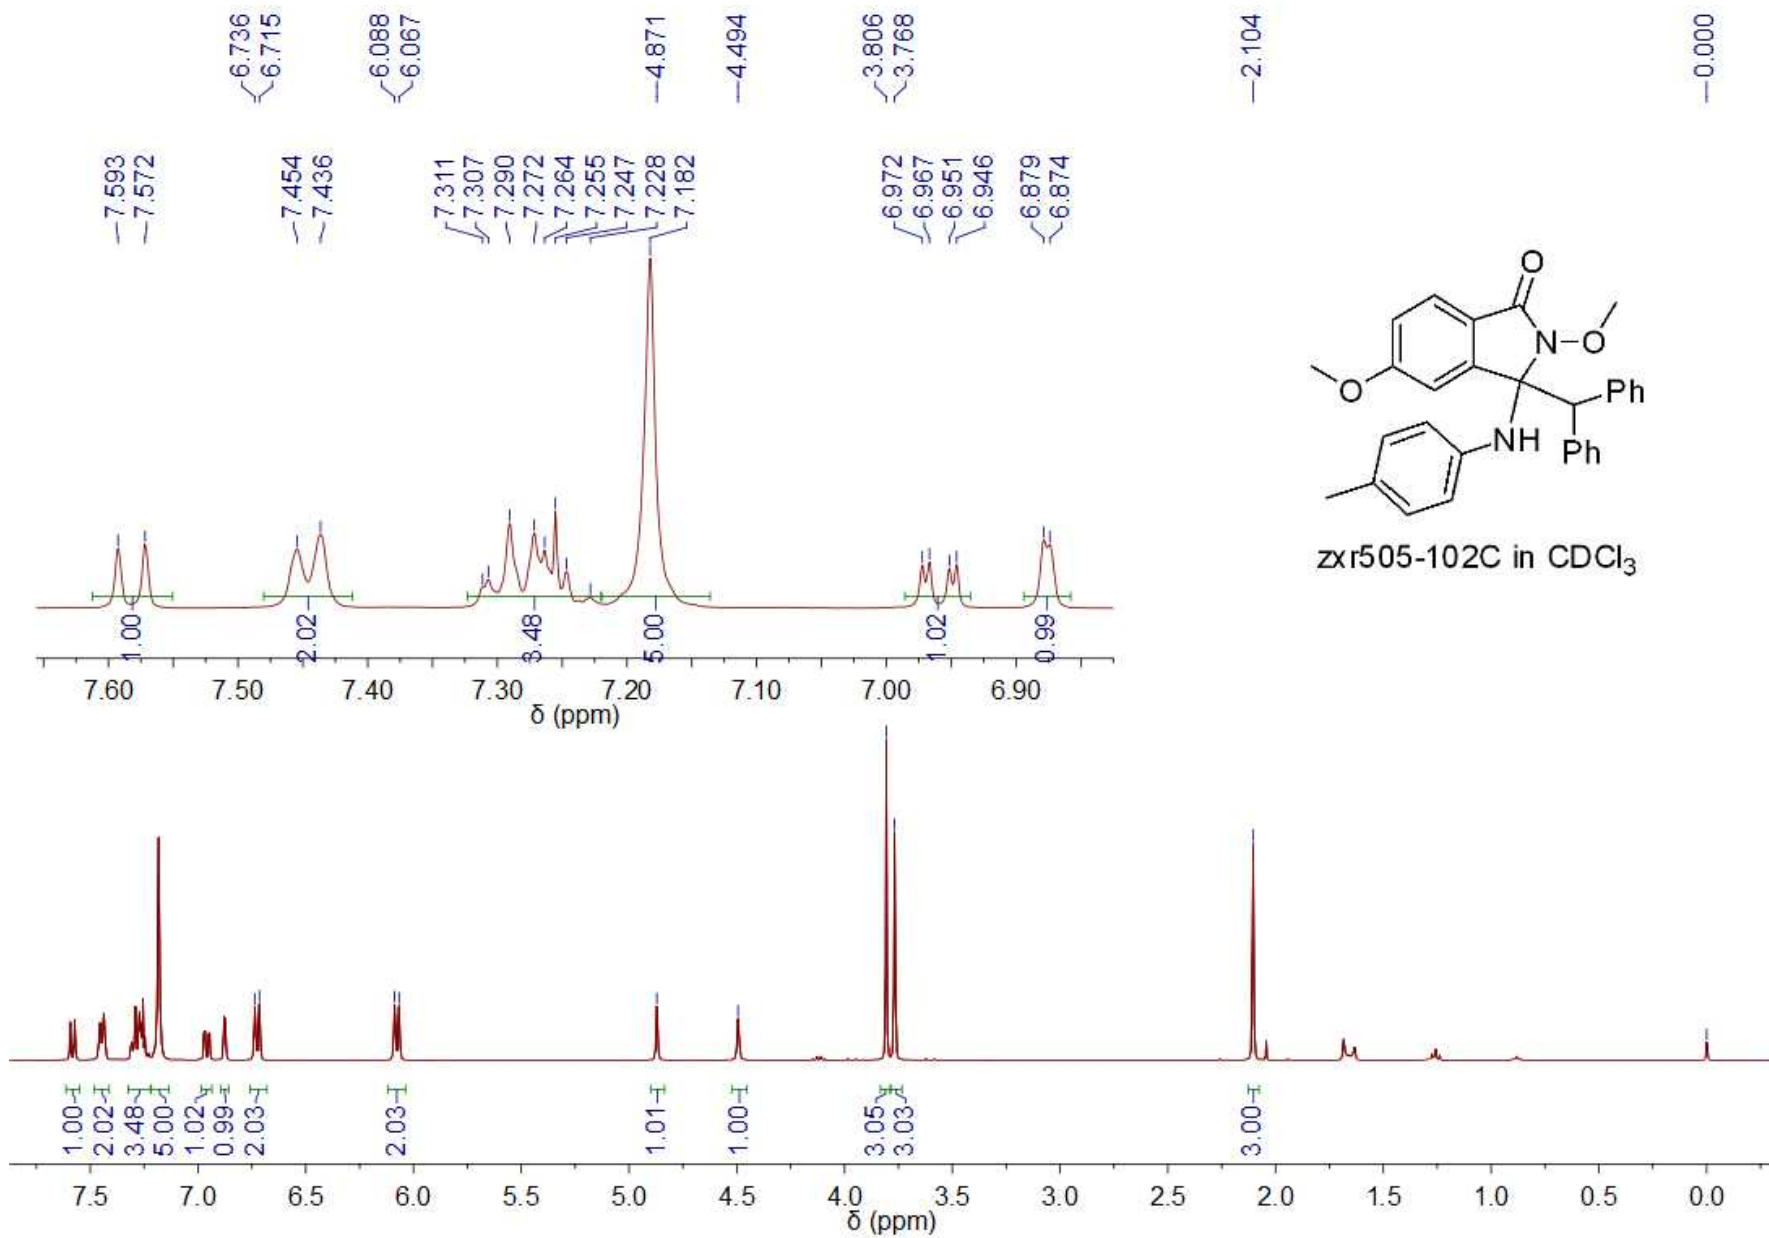

**3c** - <sup>1</sup>H NMR

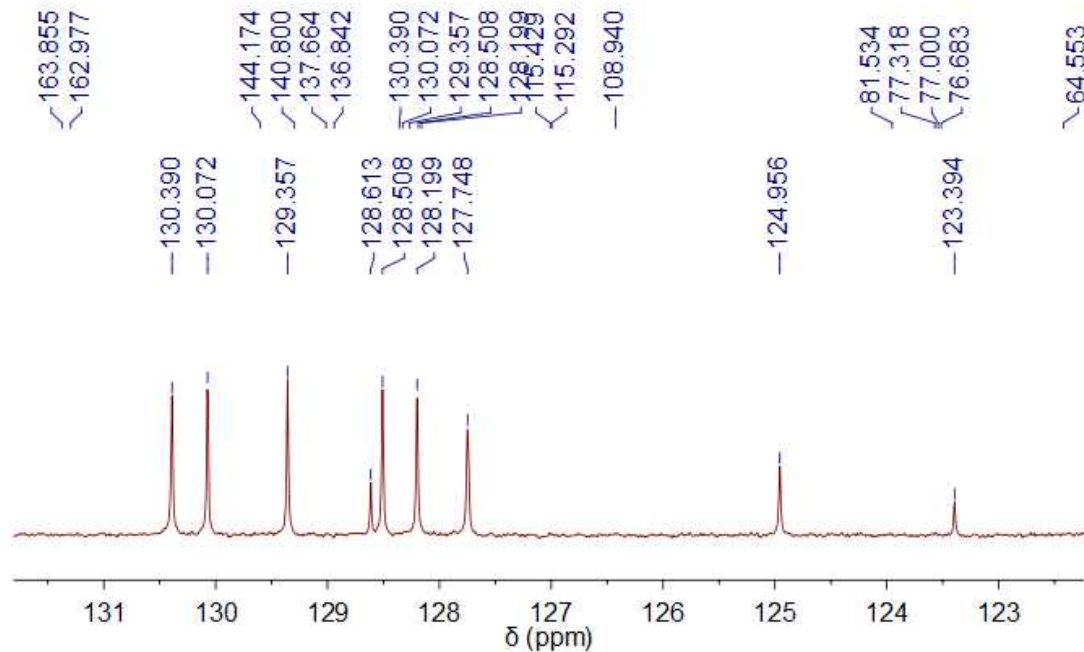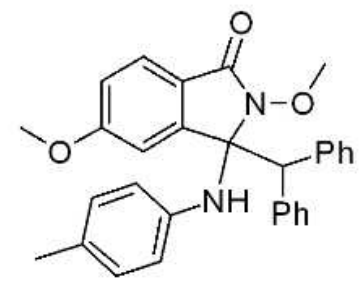

zxr505-102C in CDCl<sub>3</sub>

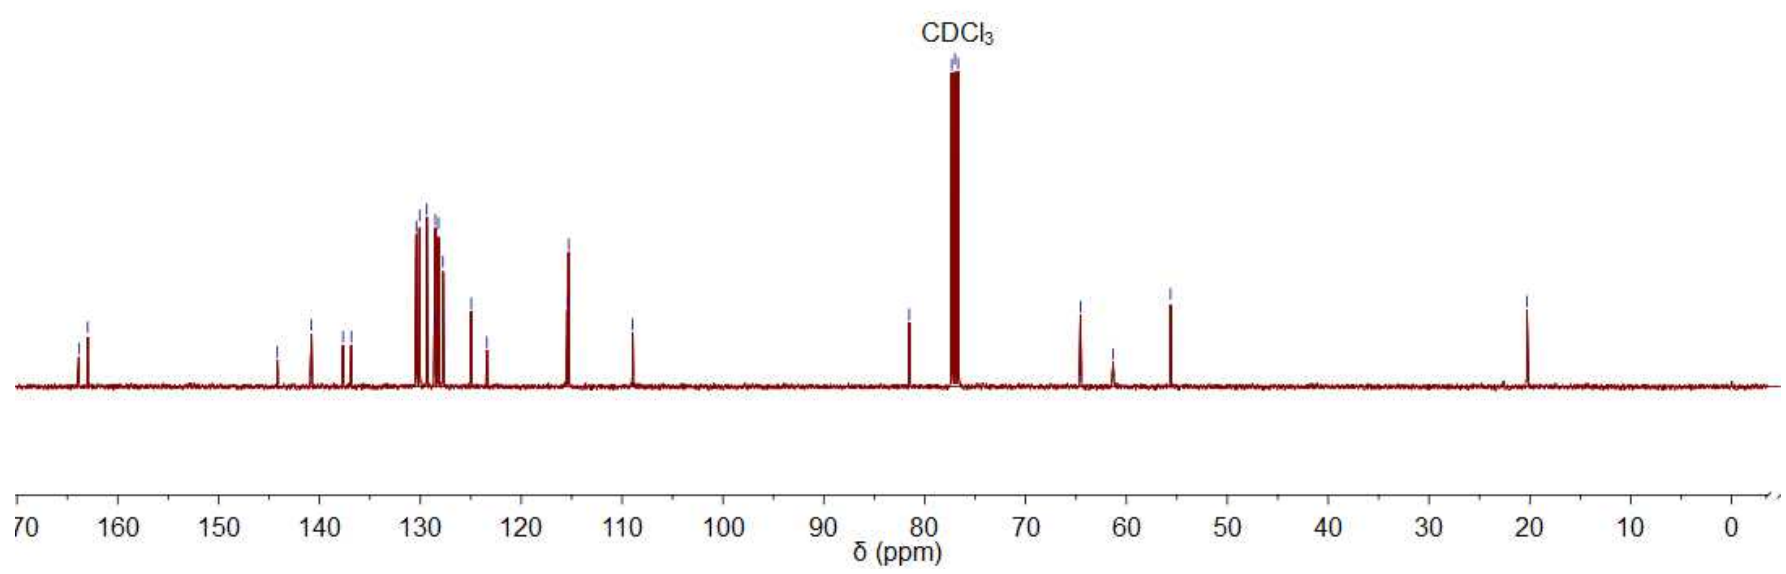

**3c** – <sup>13</sup>C NMR

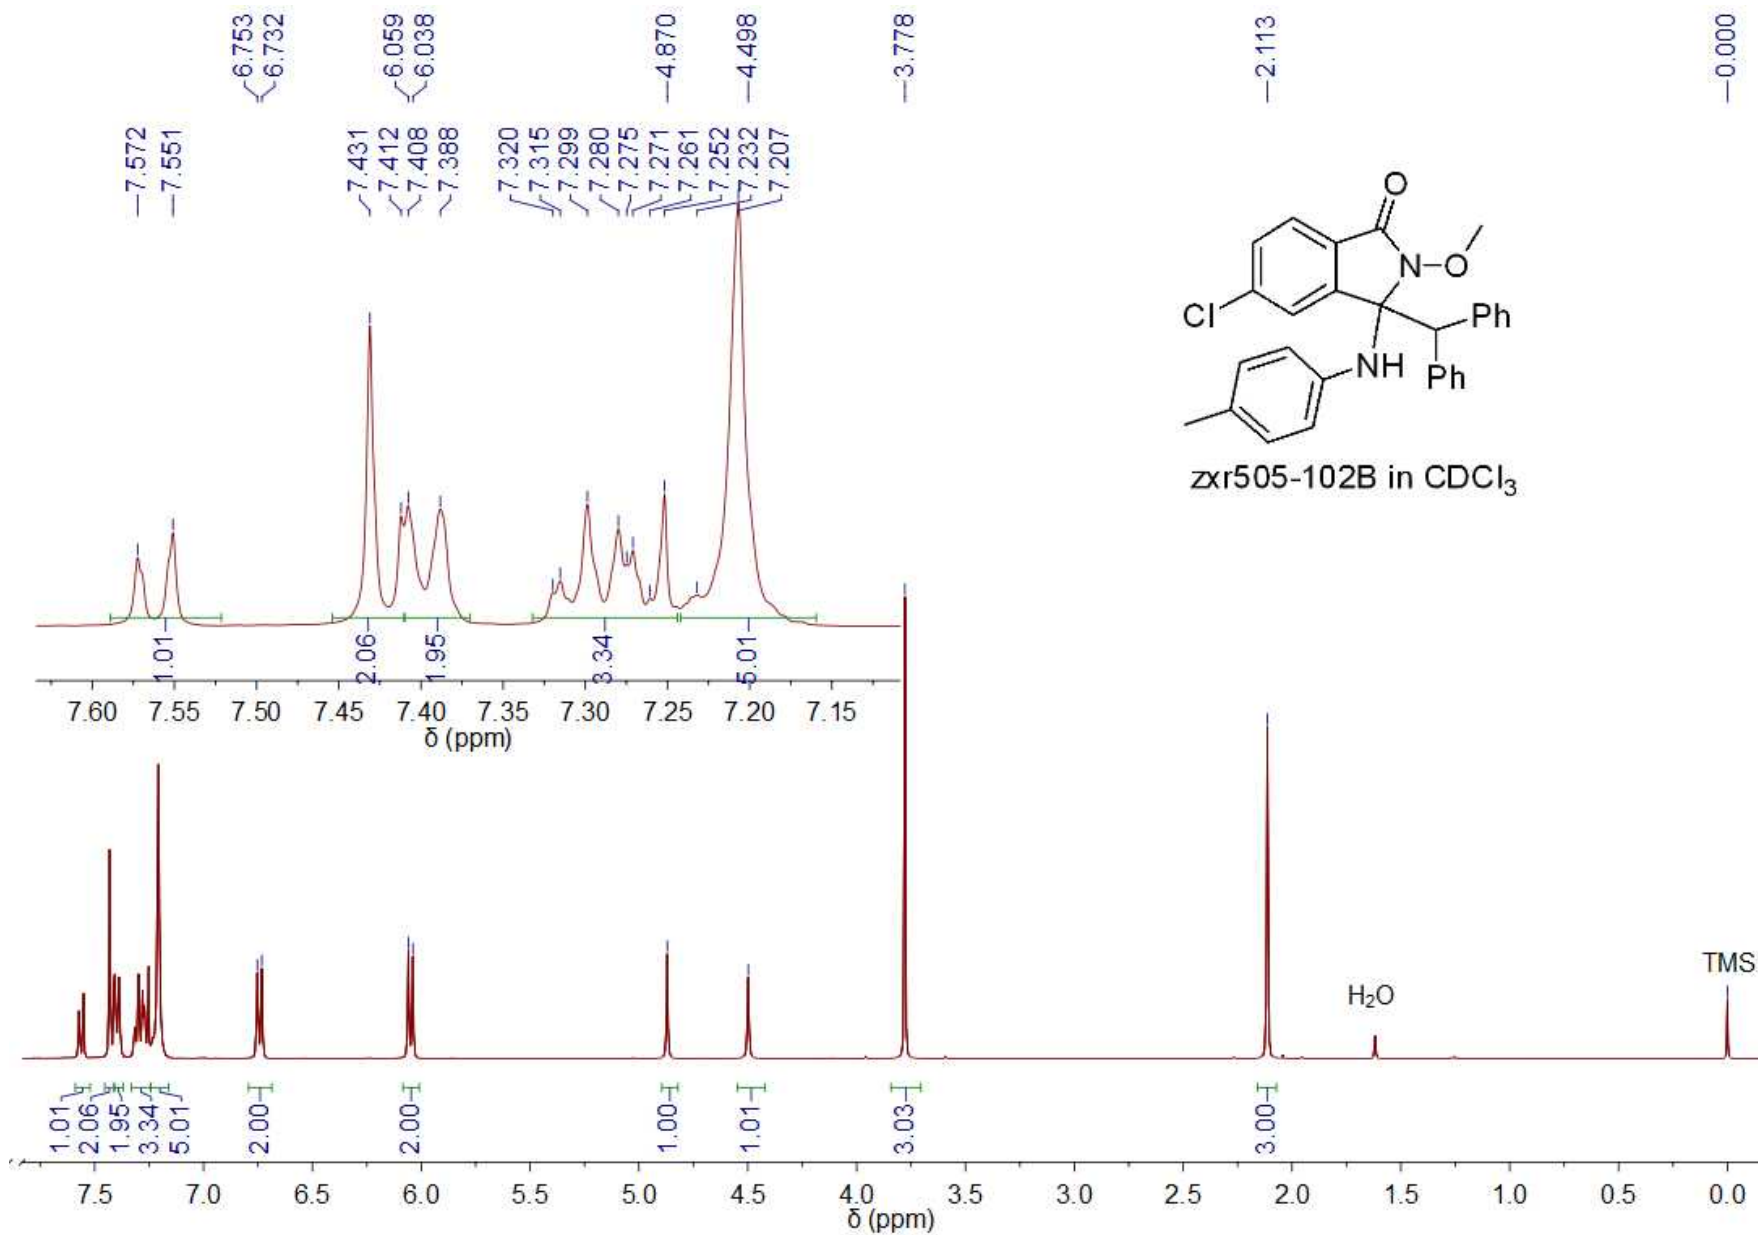

**3d** -  $^1\text{H}$  NMR

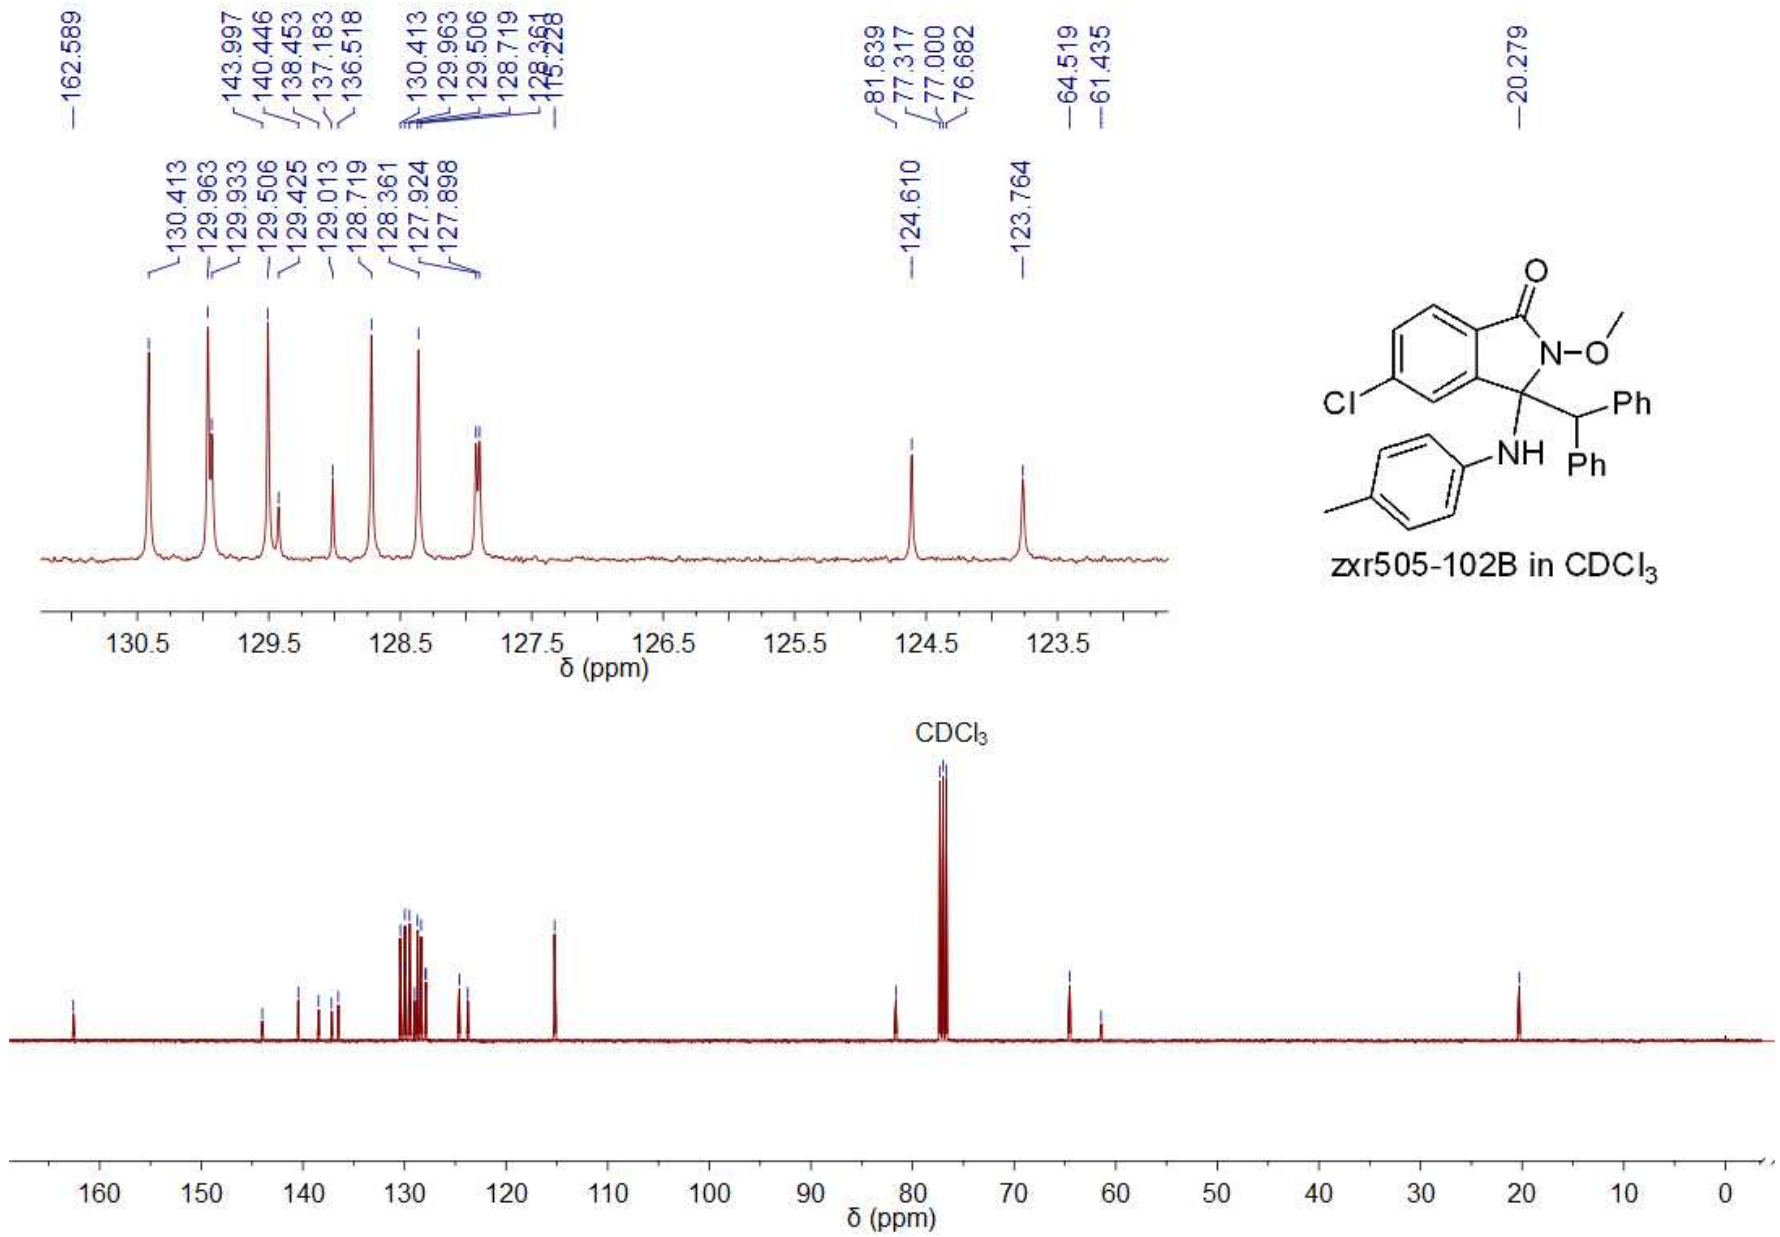

**3d** – <sup>13</sup>C NMR

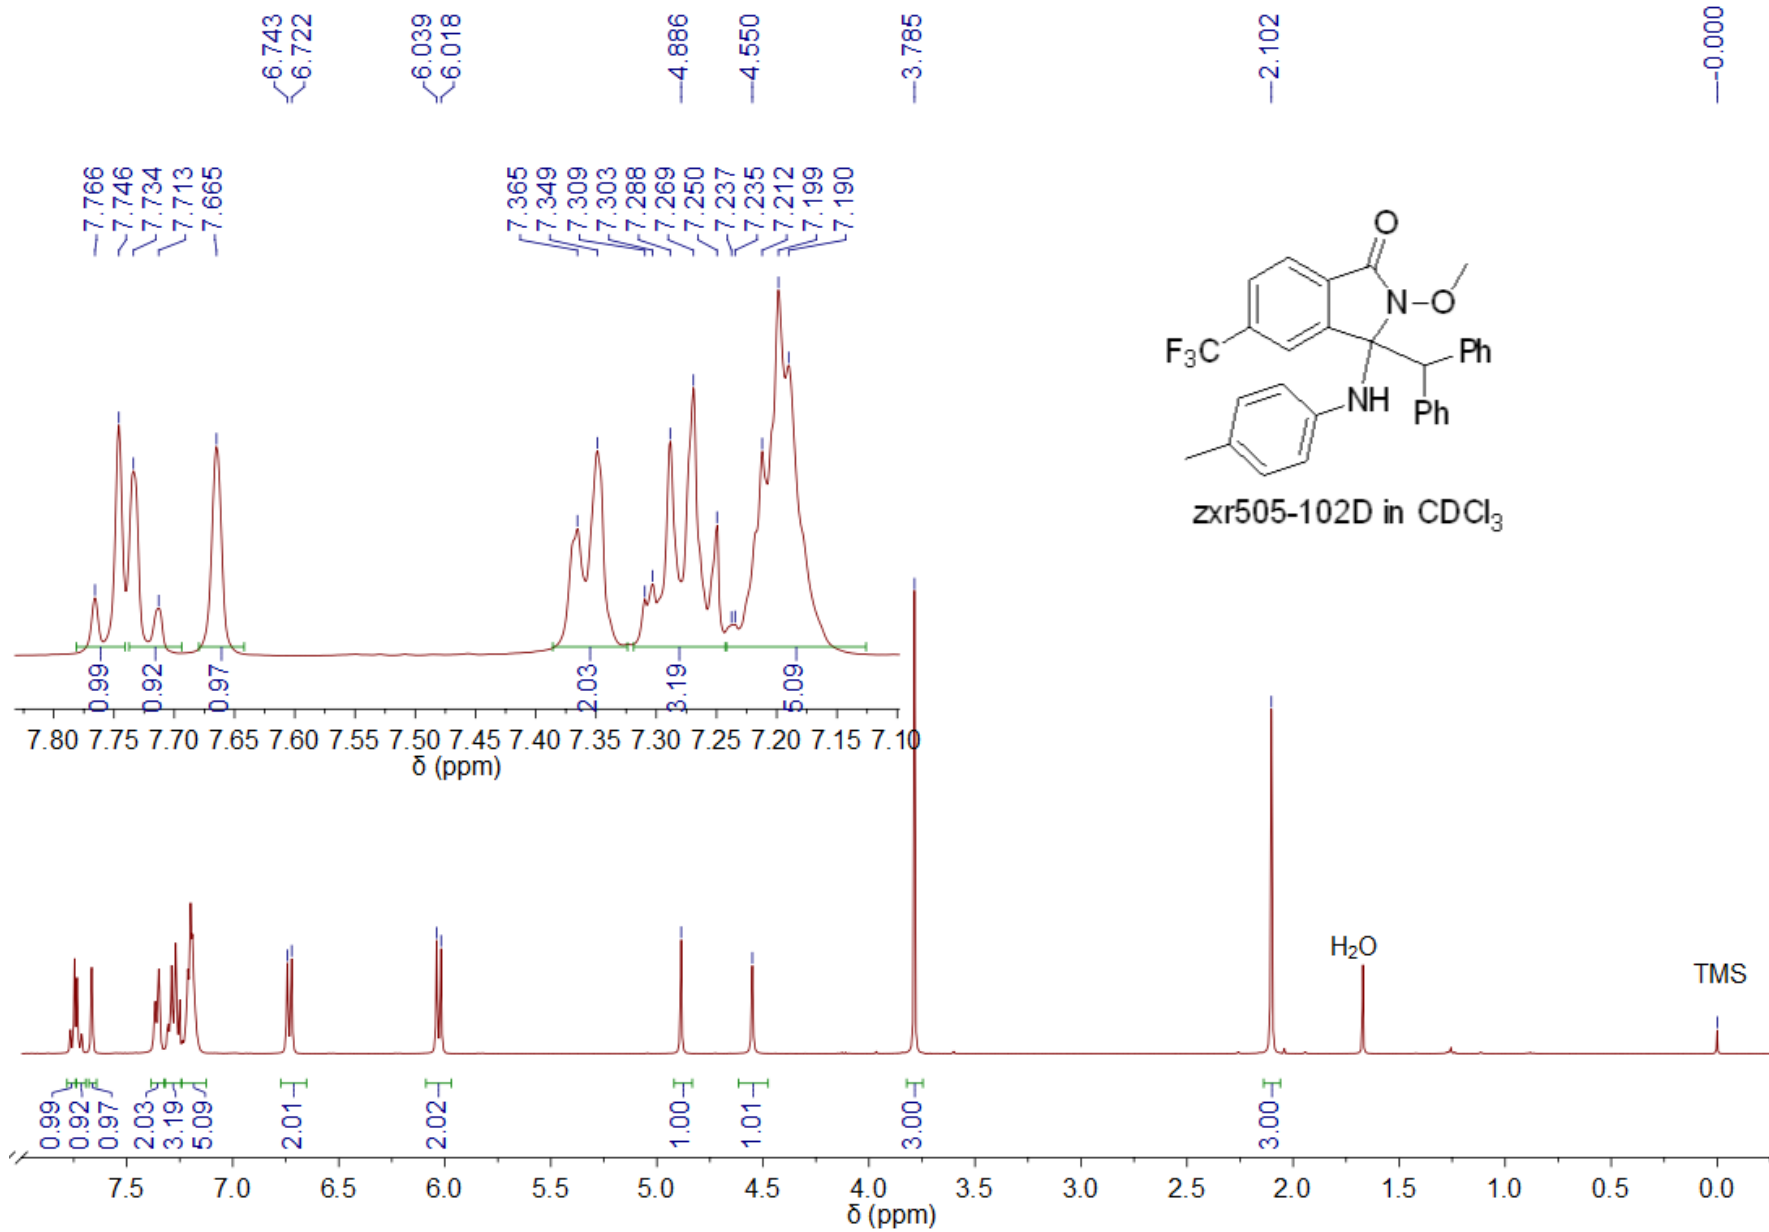

**3e** -  $^1\text{H NMR}$

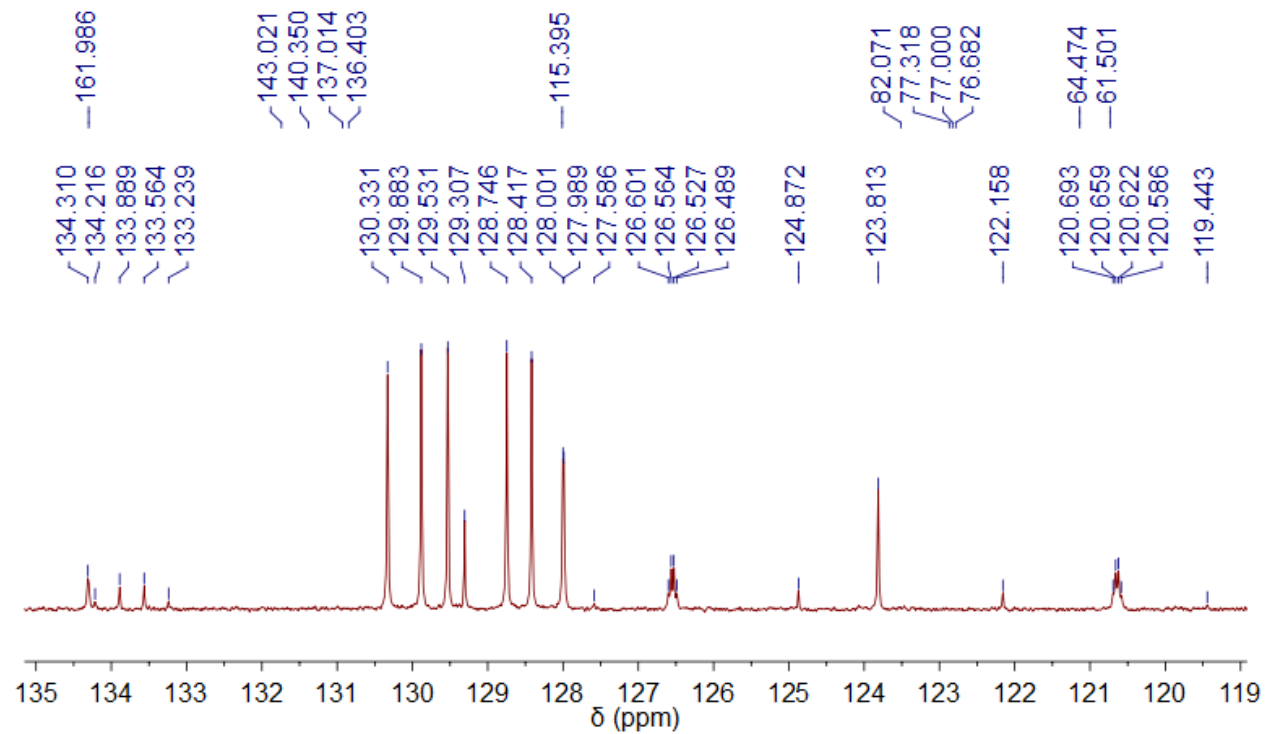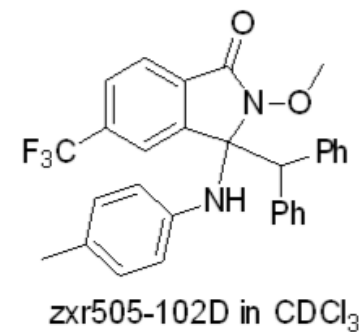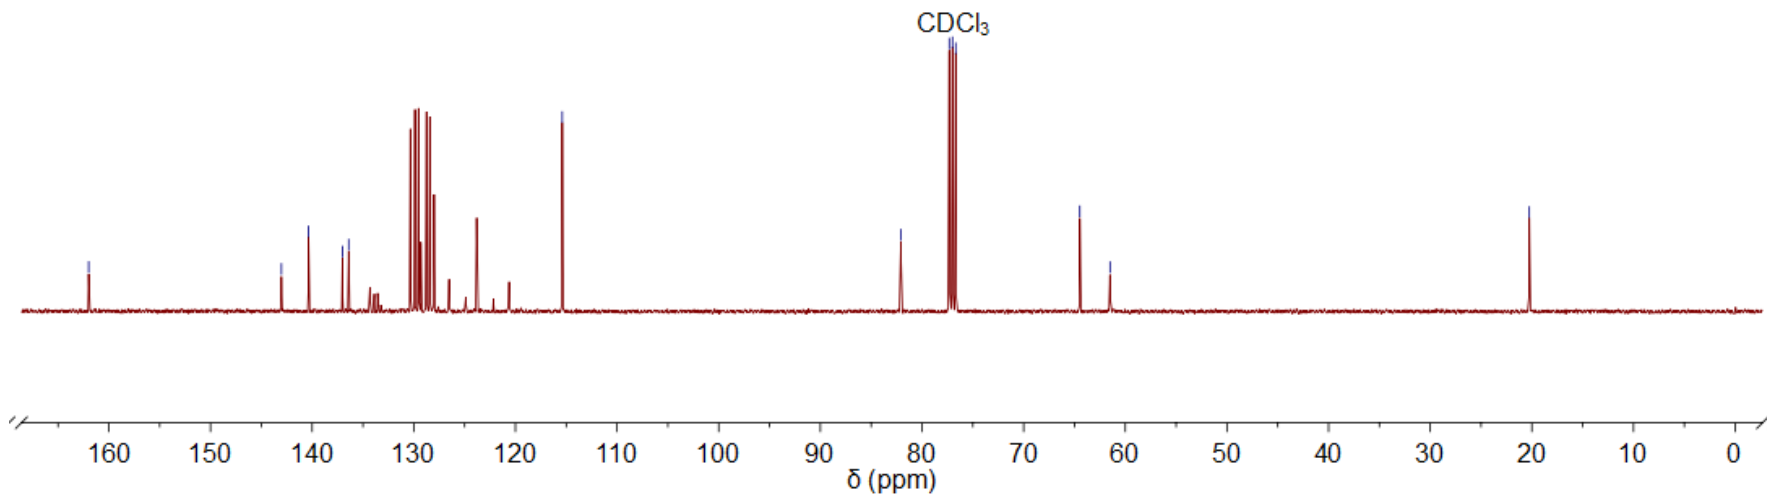

**3e** – <sup>13</sup>C NMR

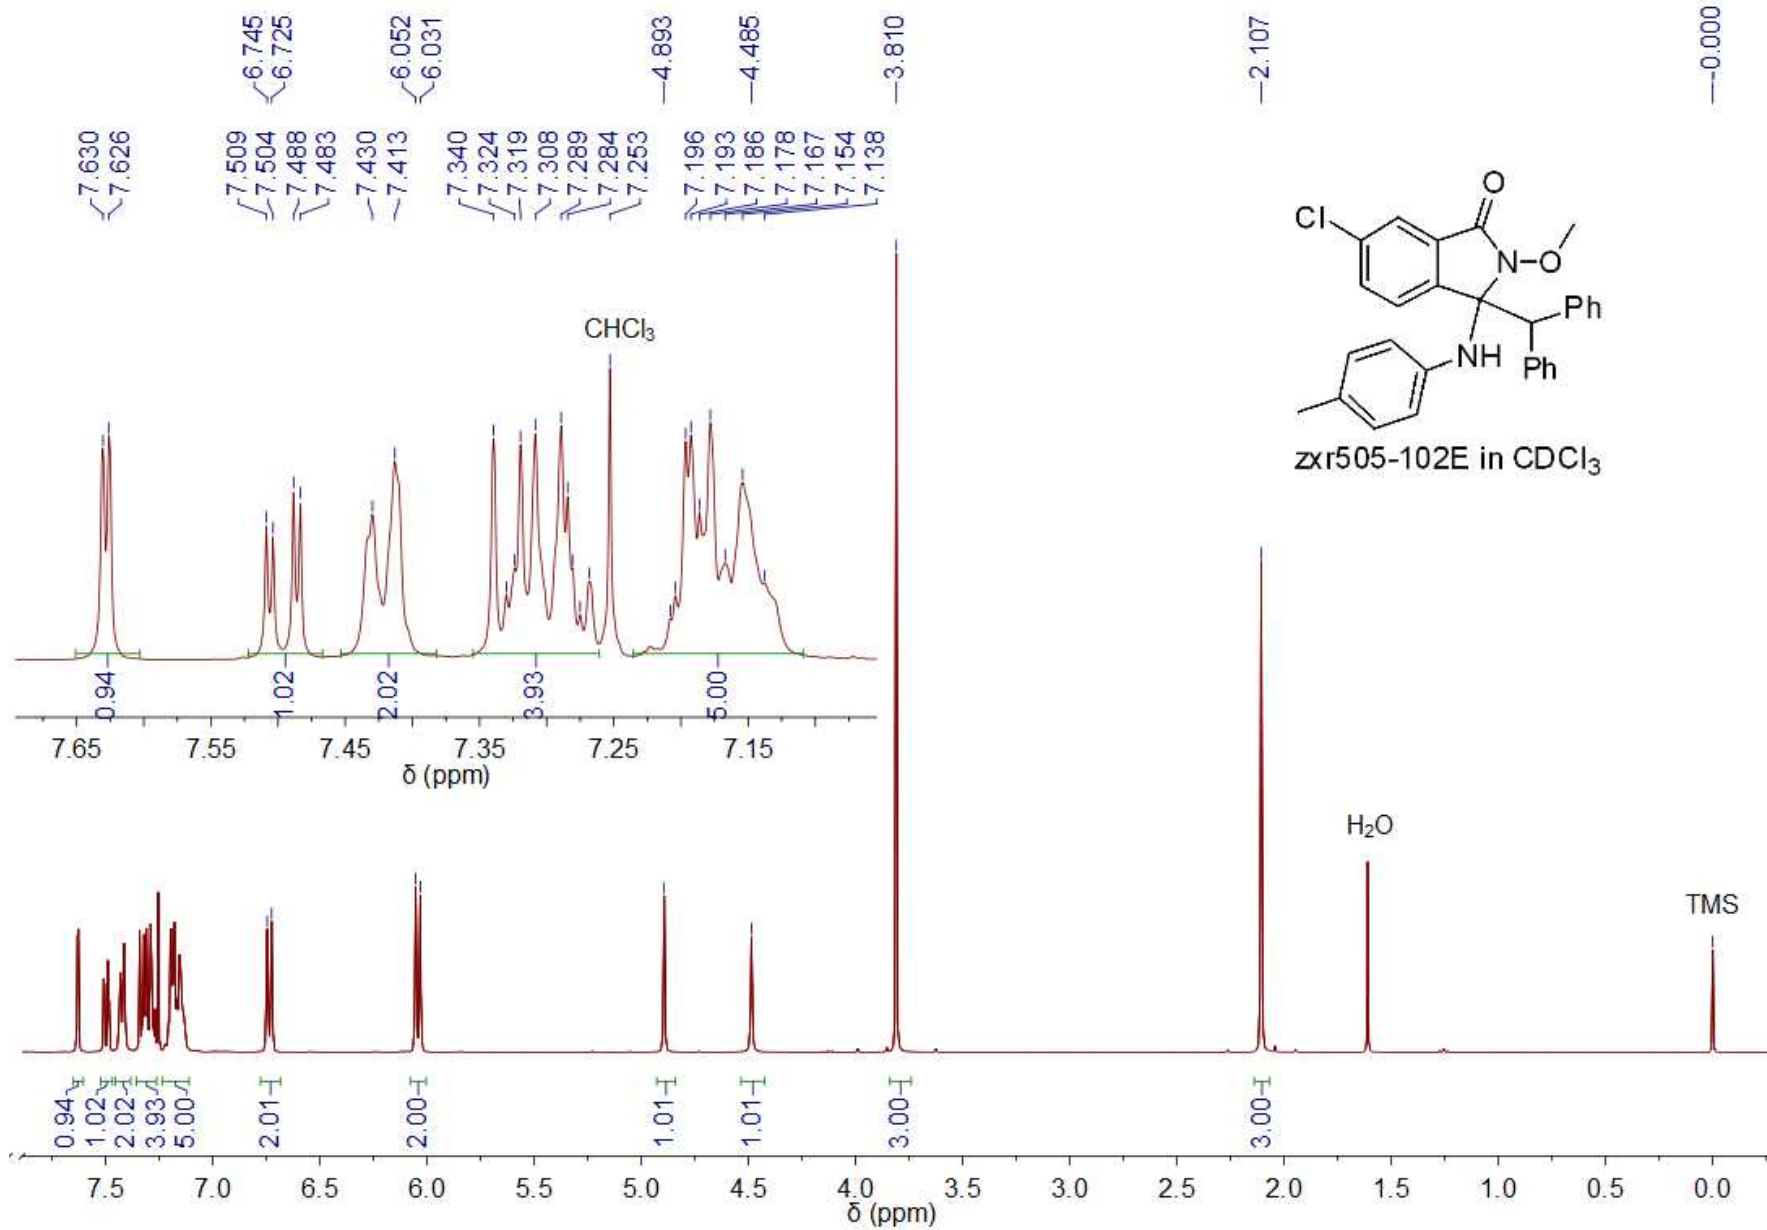



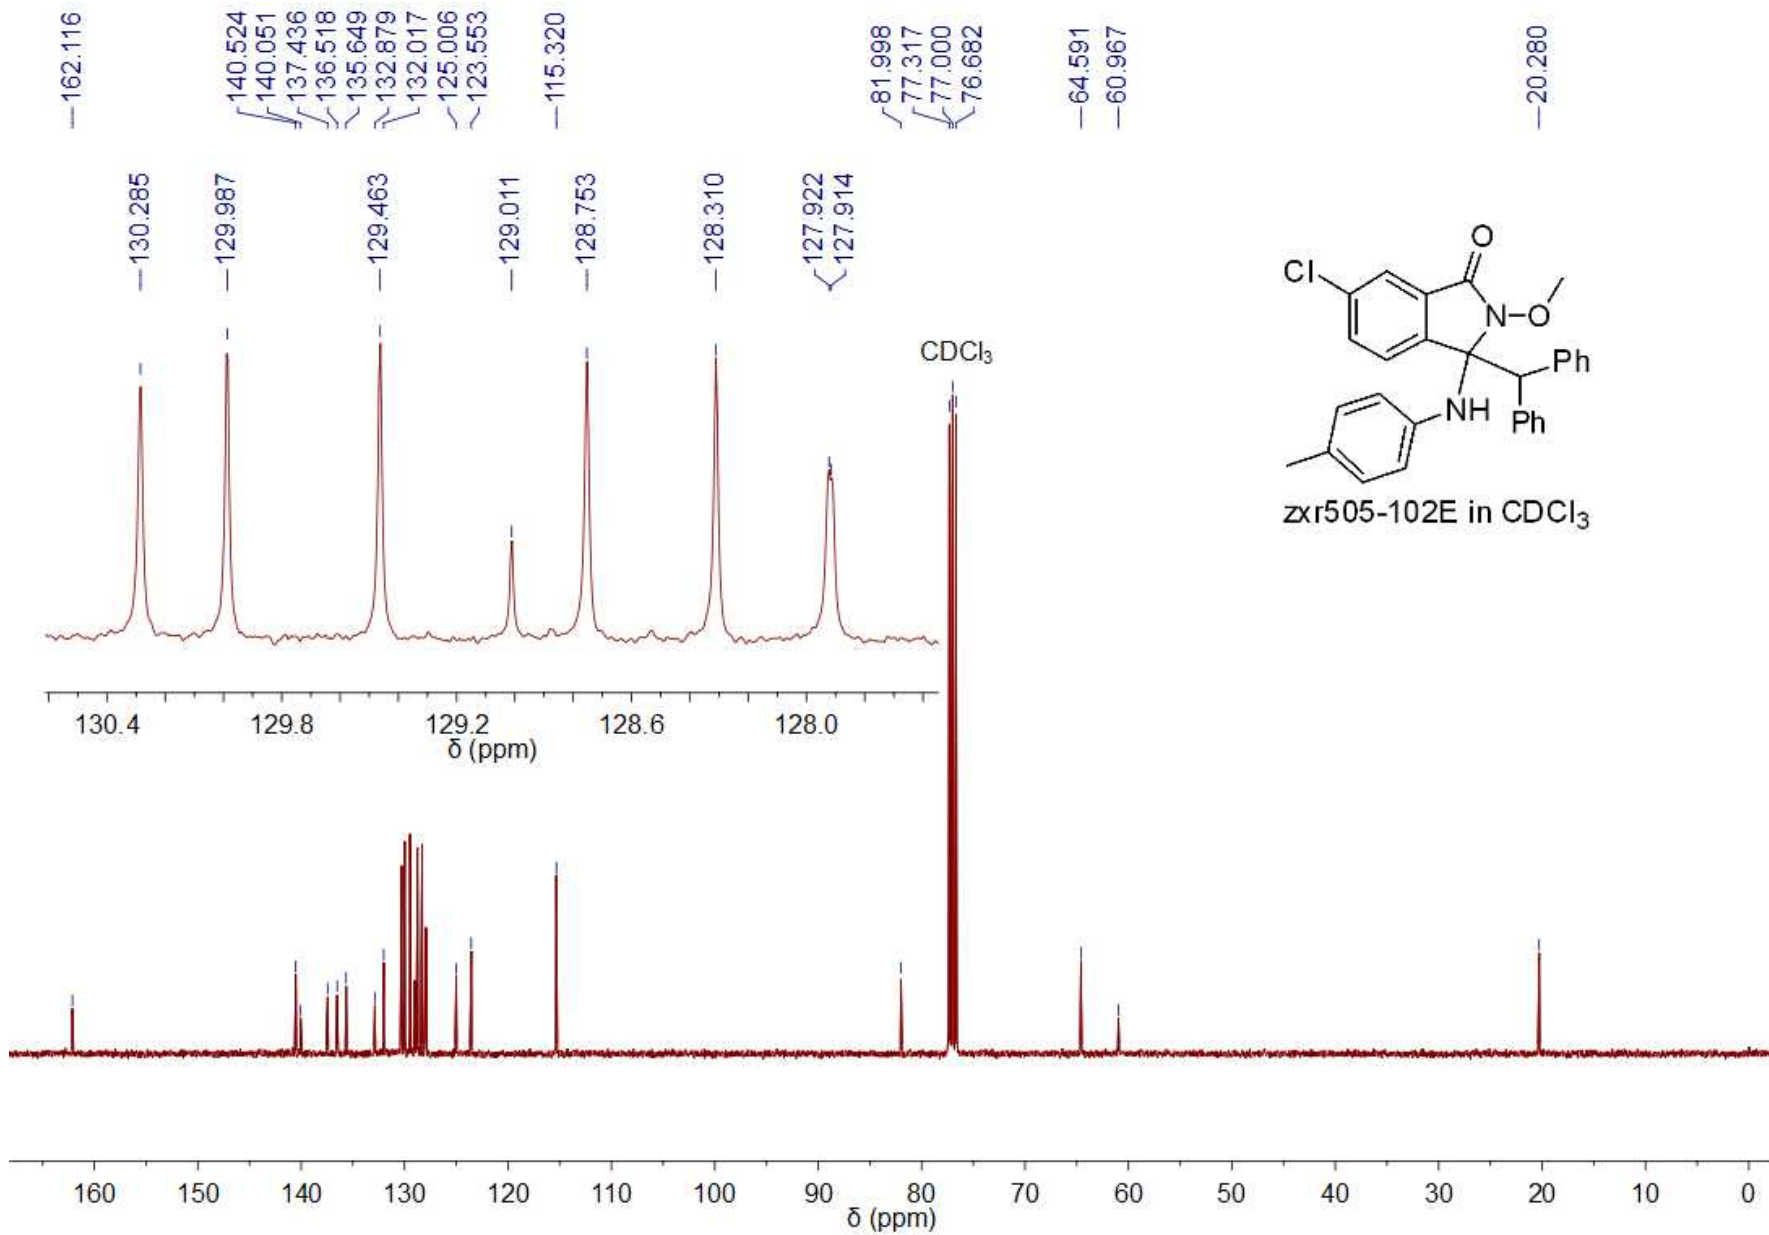

**3f** – <sup>13</sup>C NMR



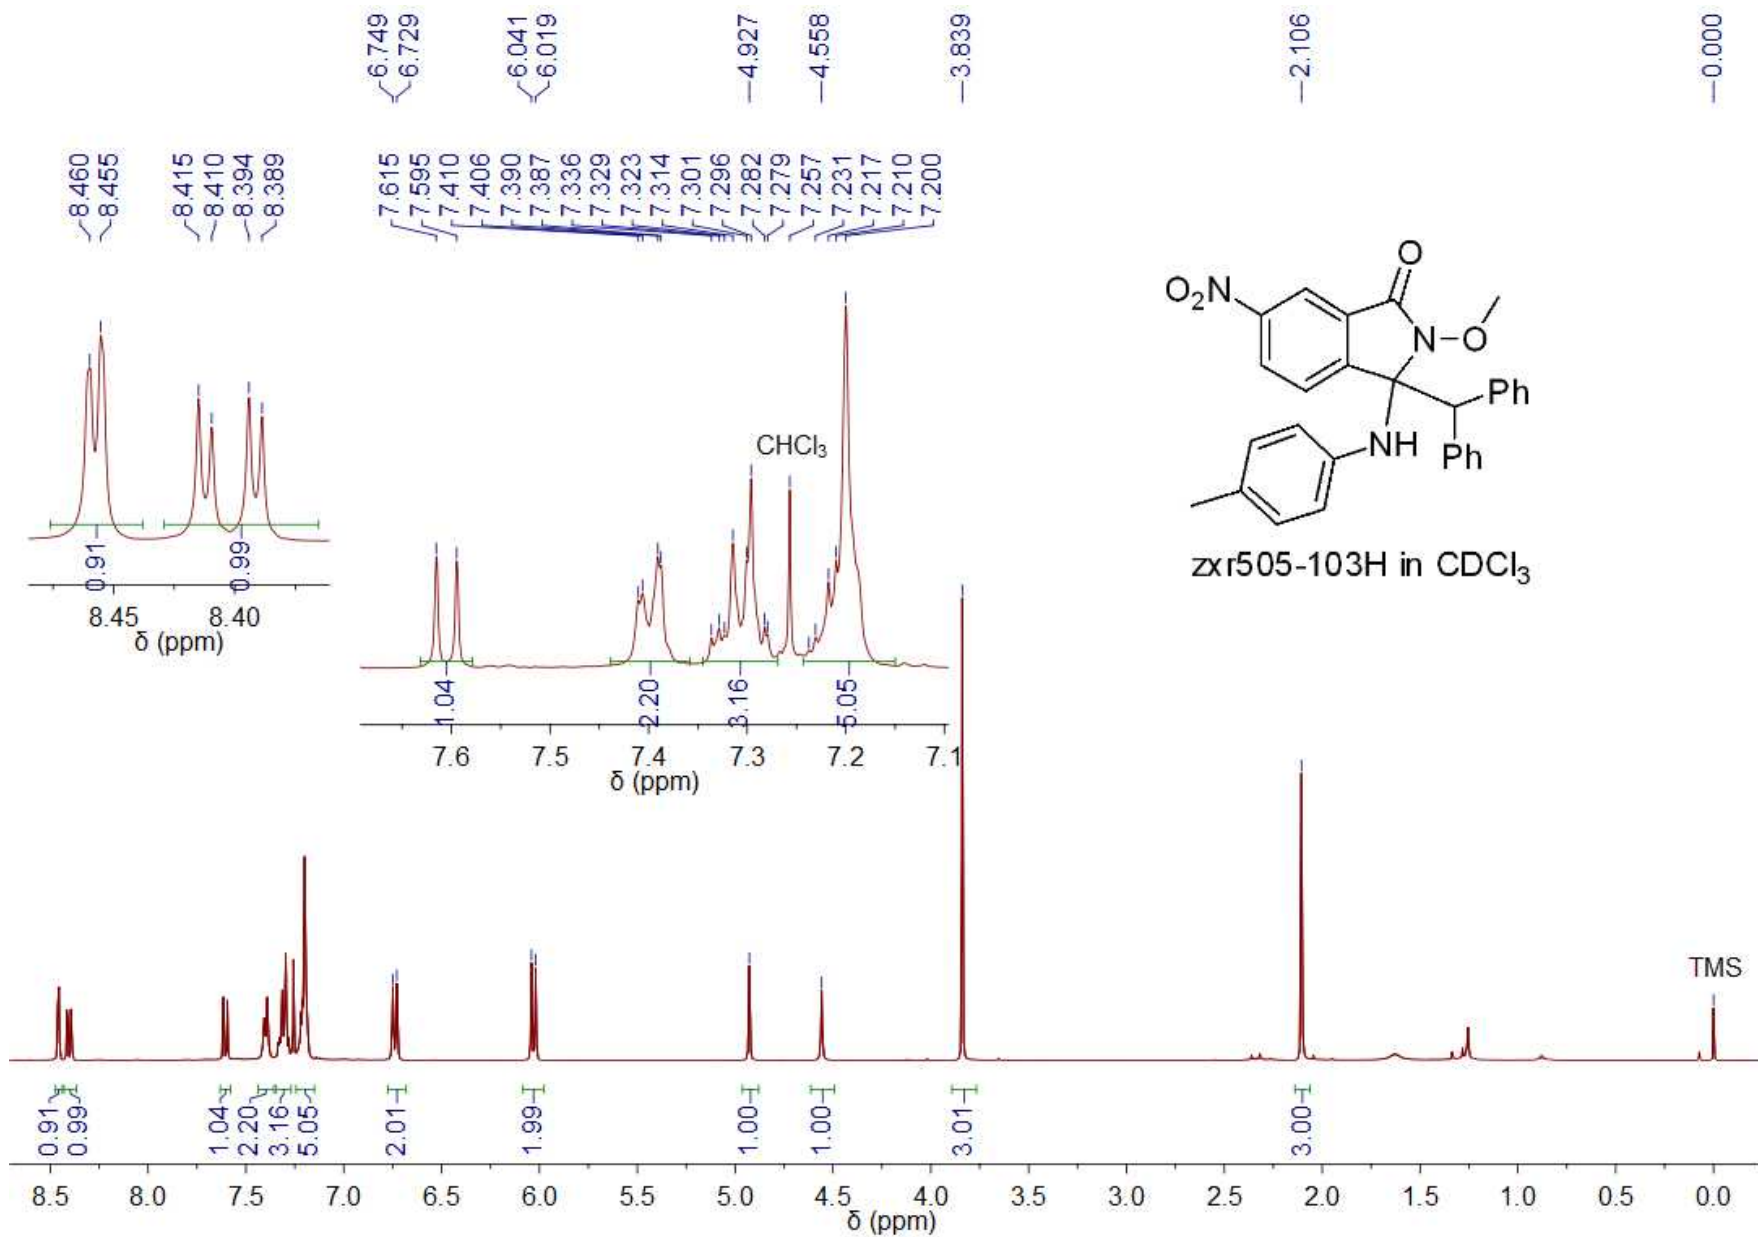

**3g** - <sup>1</sup>H NMR

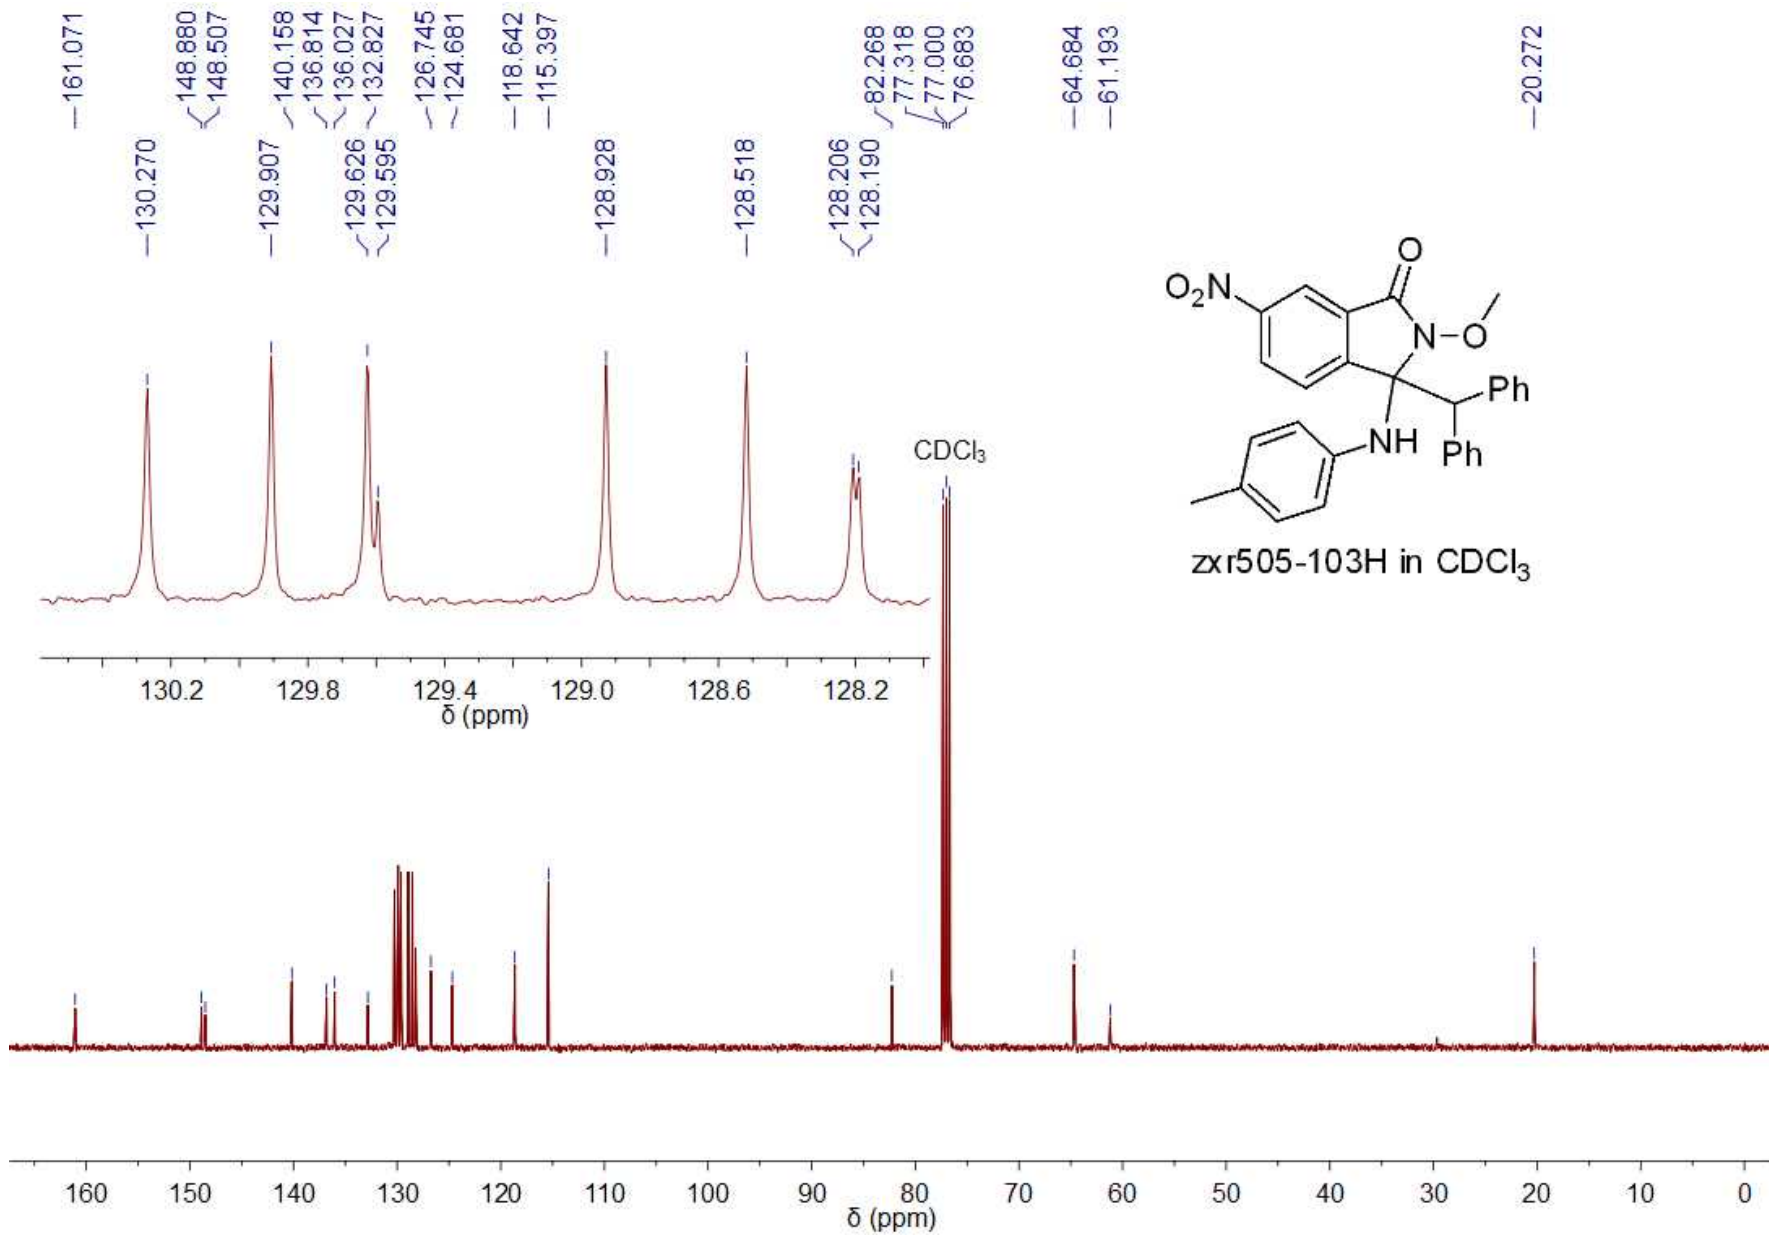

**3g** – <sup>13</sup>C NMR

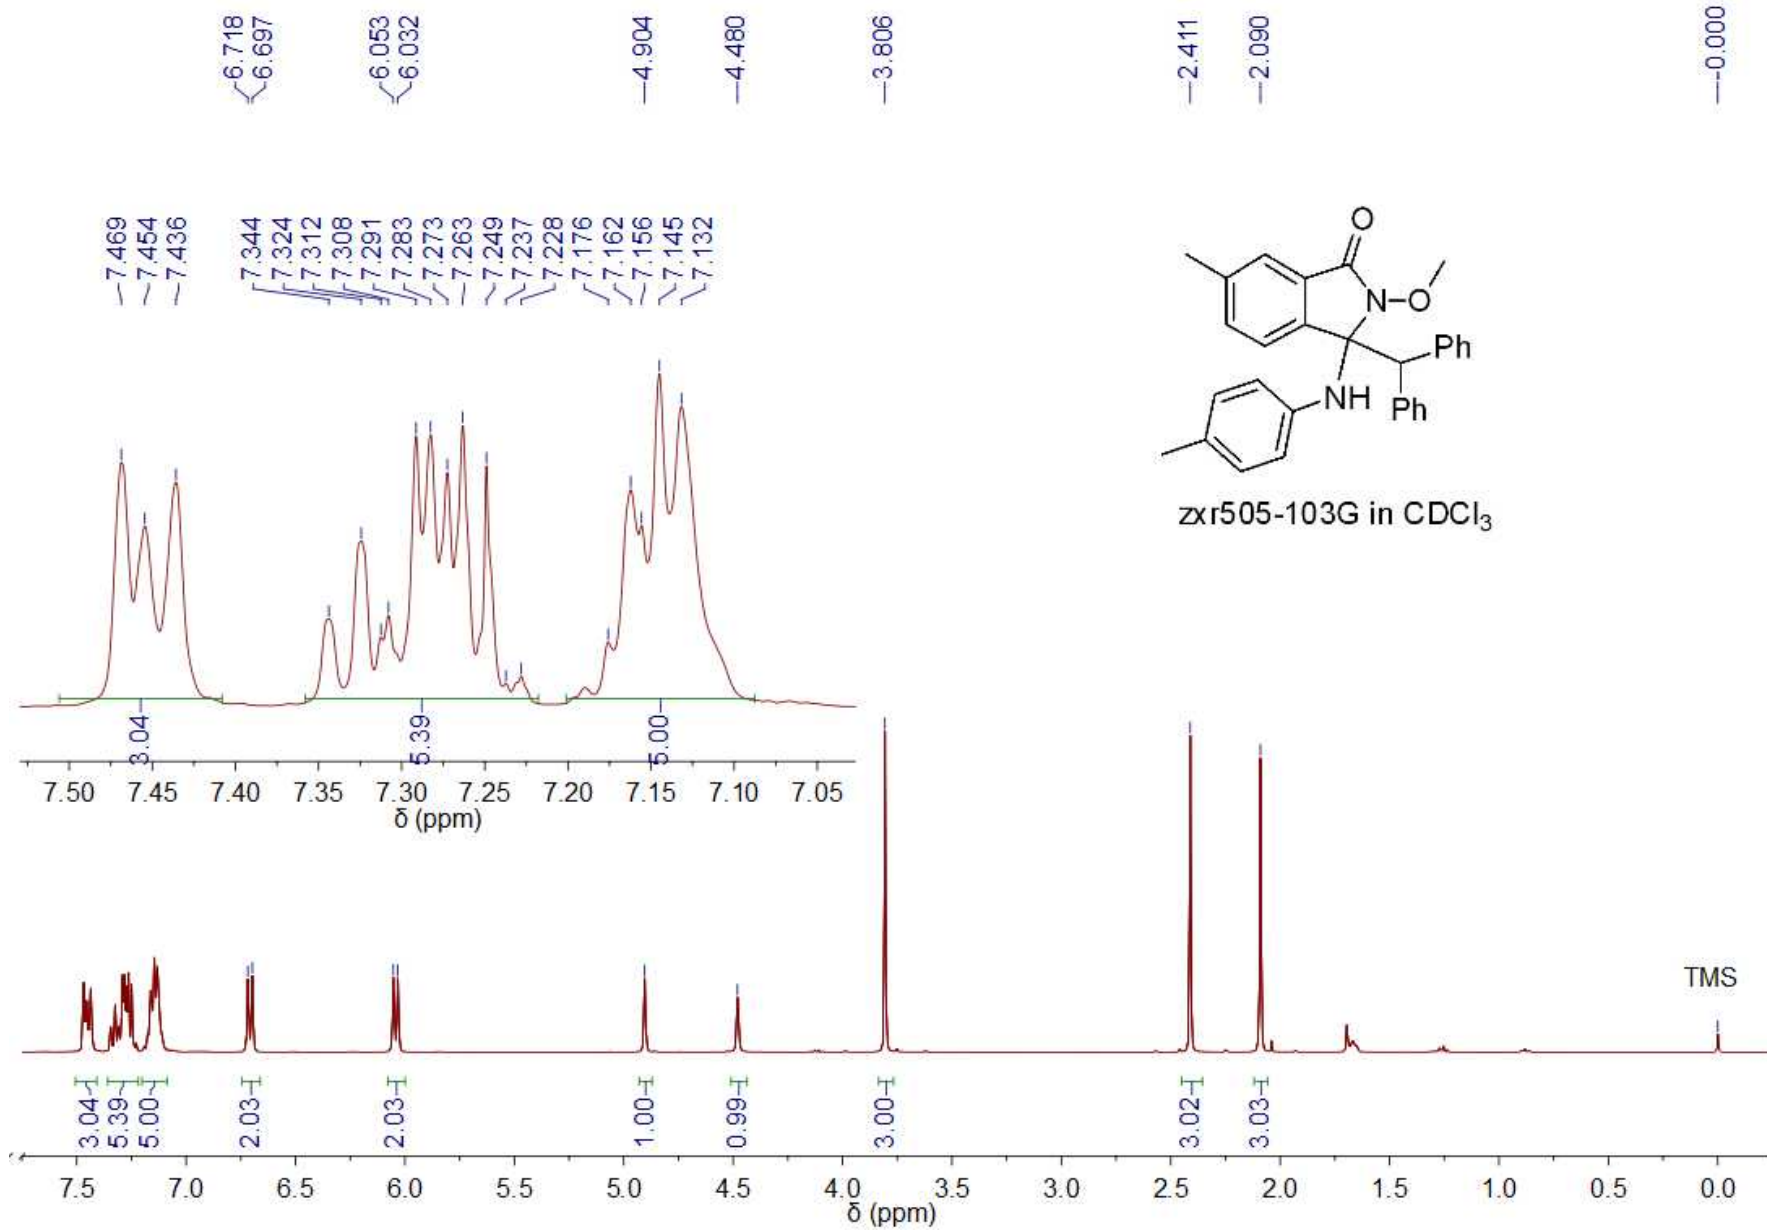

**3h** - <sup>1</sup>H NMR

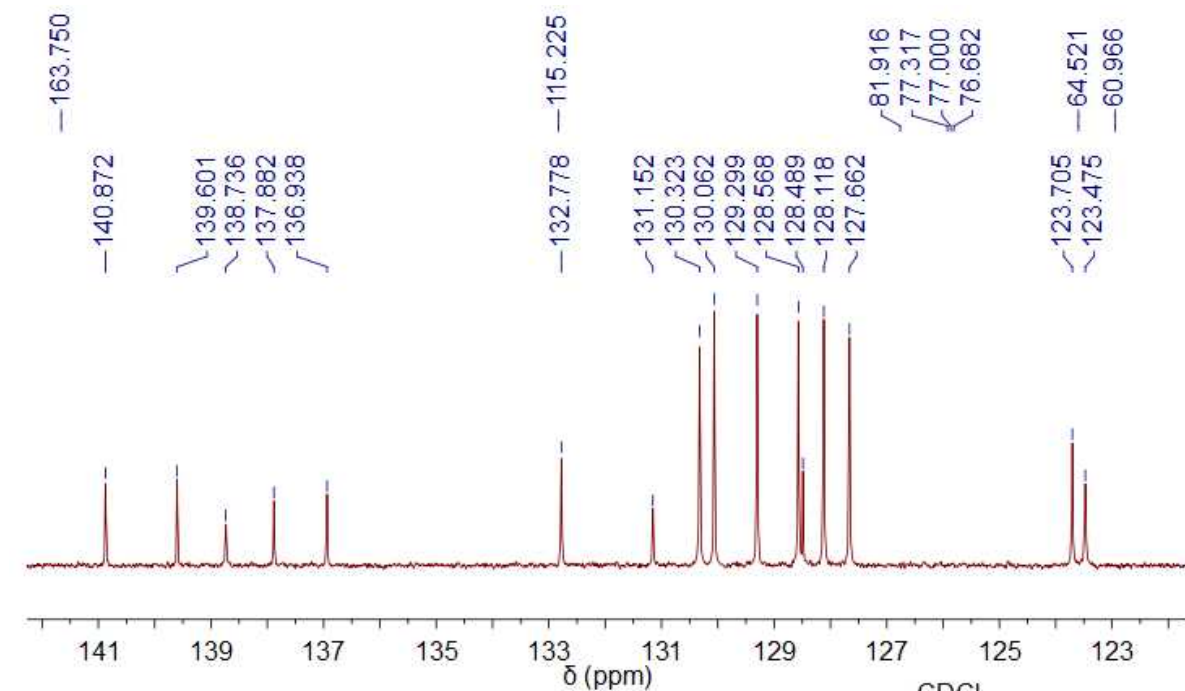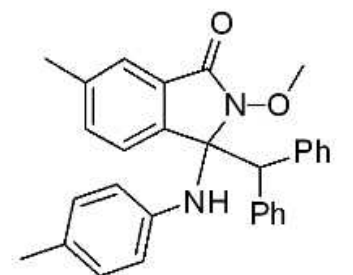

zxr505-103G in CDCl<sub>3</sub>

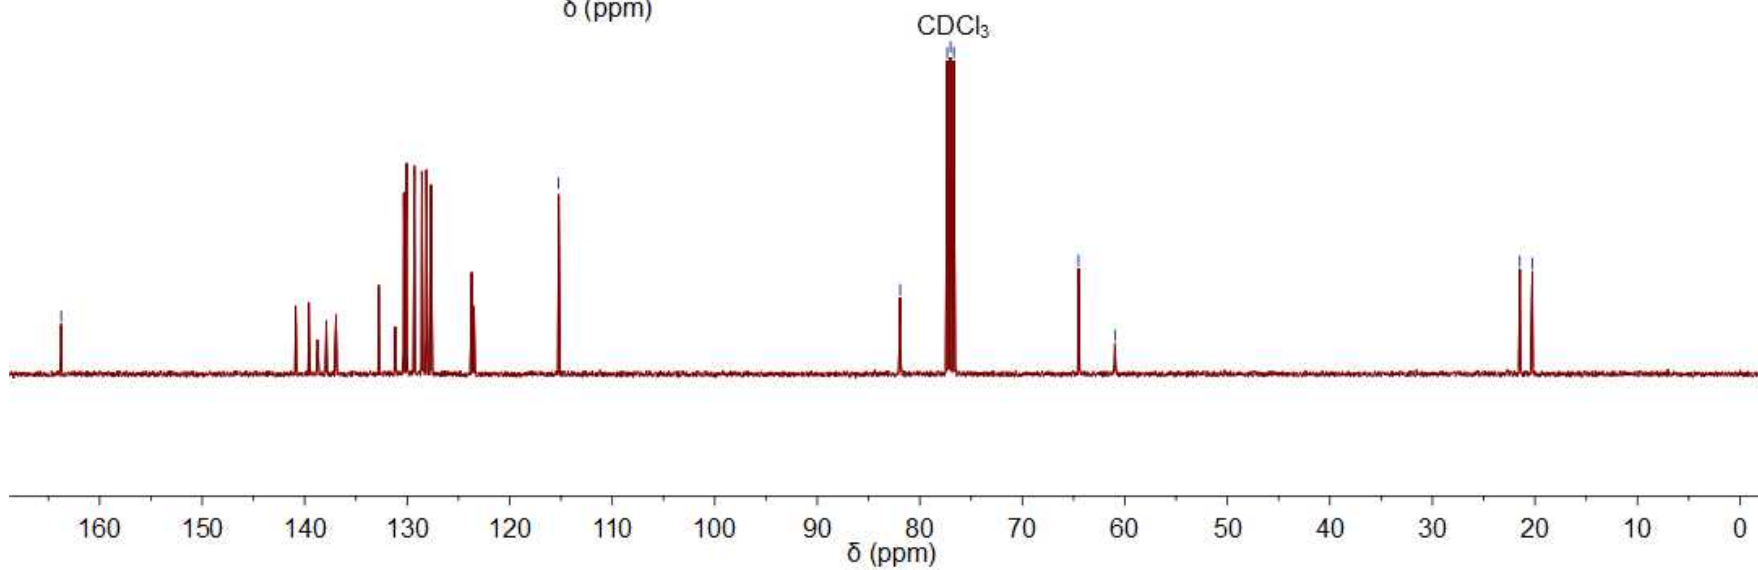

**3h** – <sup>13</sup>C NMR

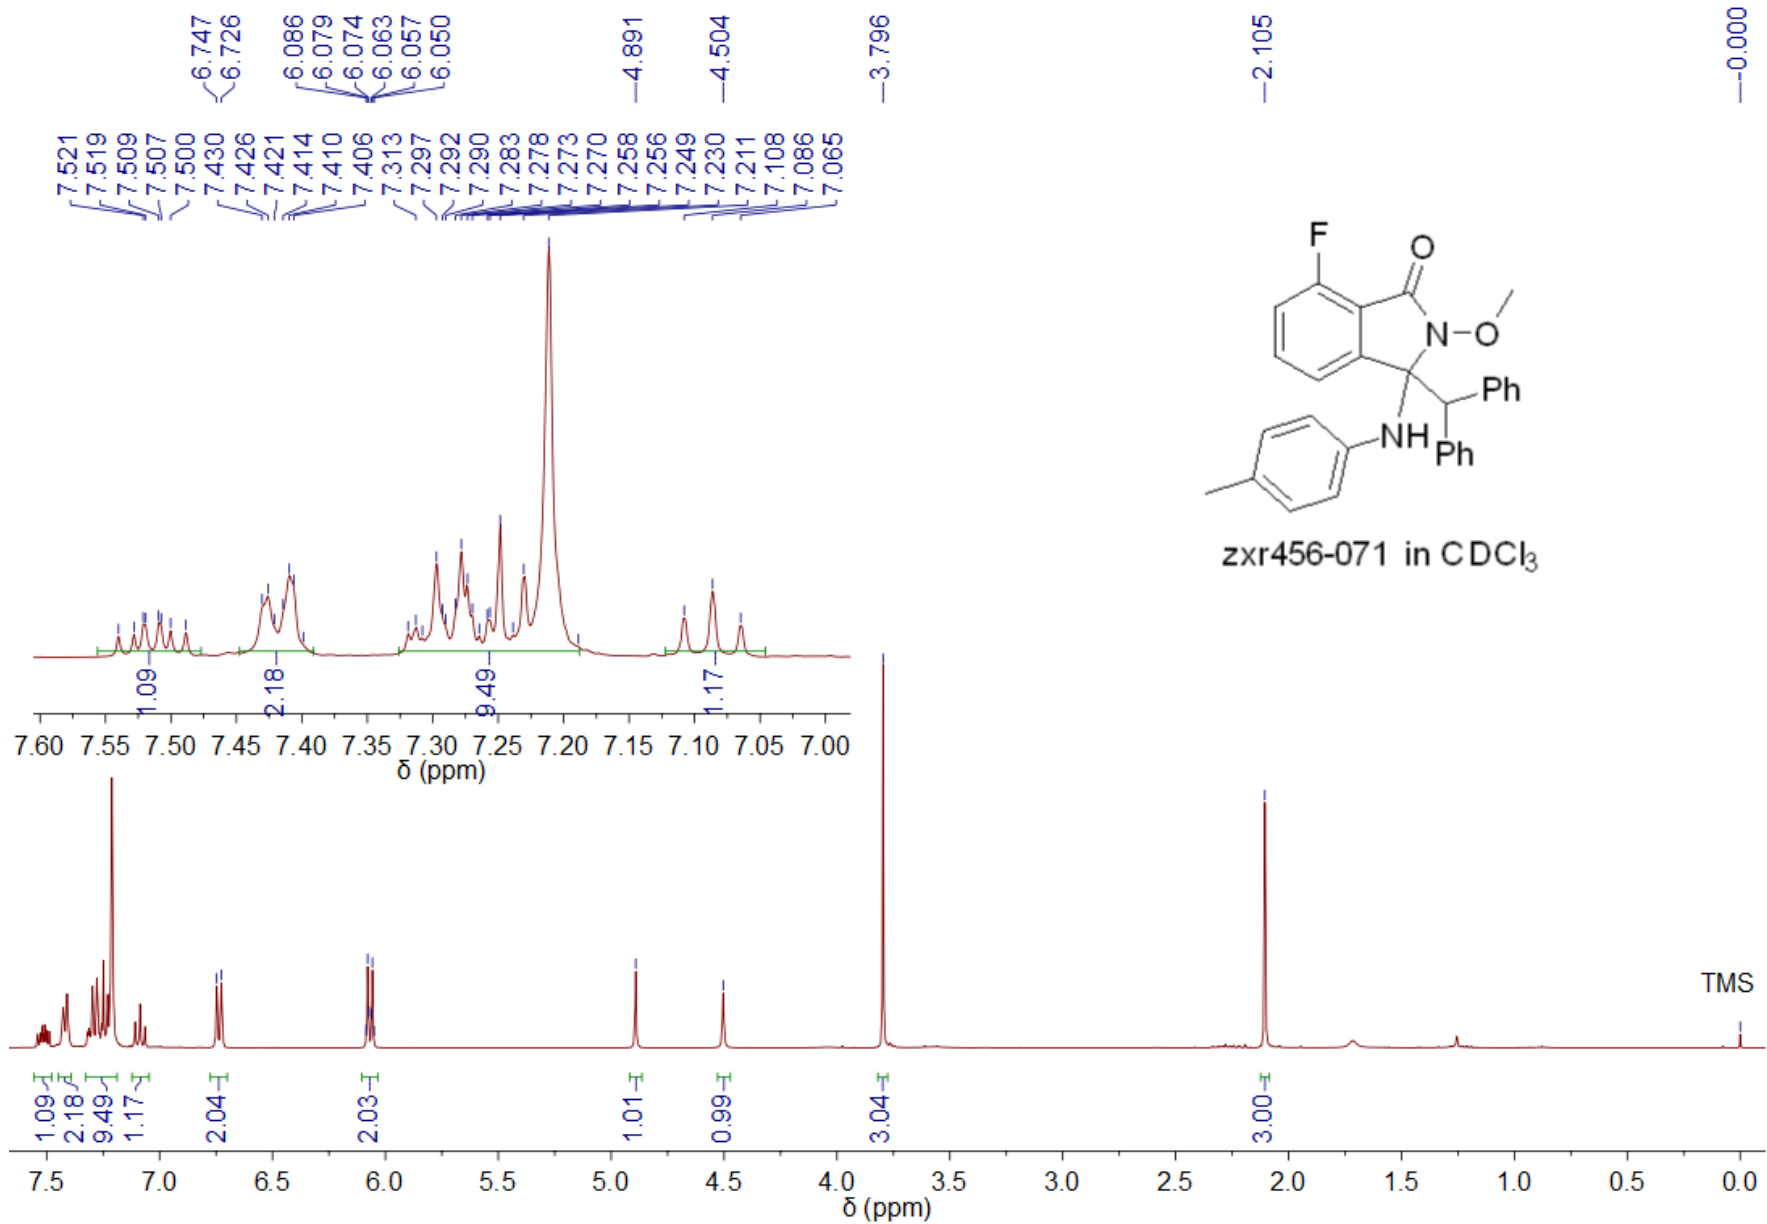

**3i** -  $^1\text{H}$  NMR

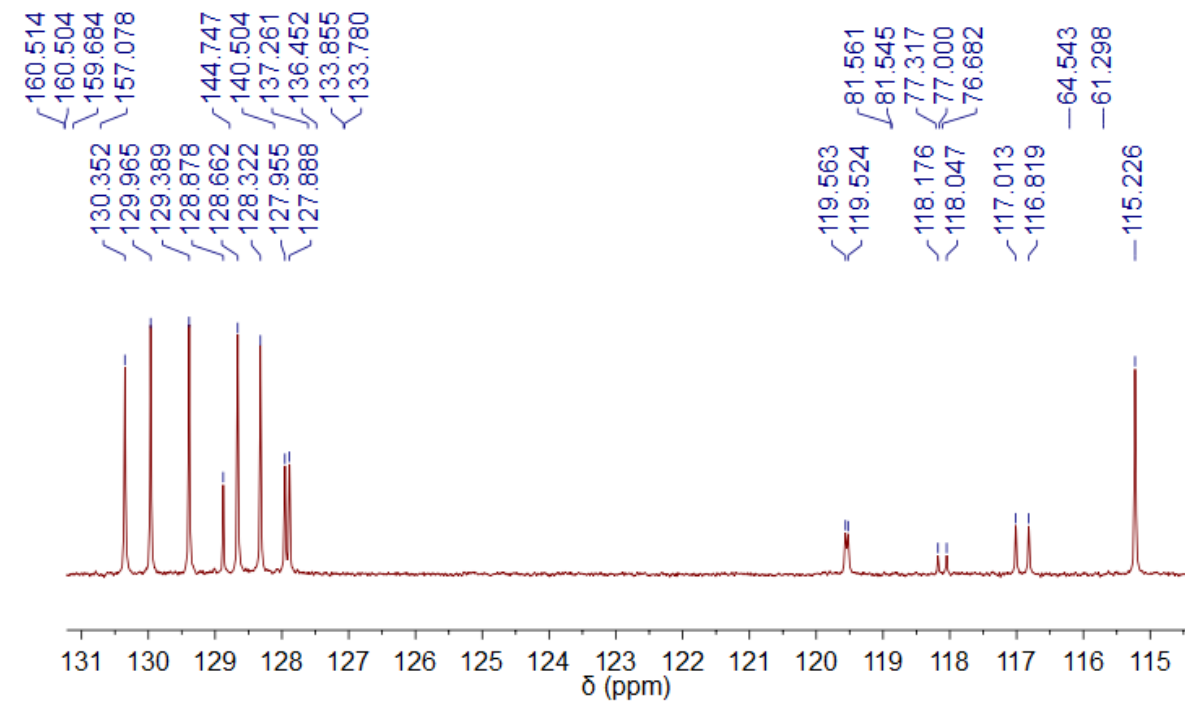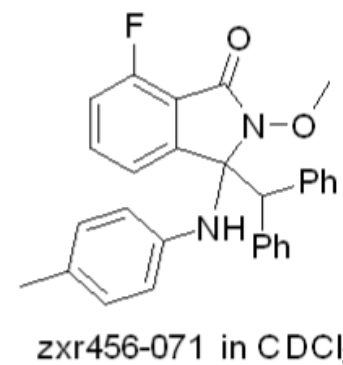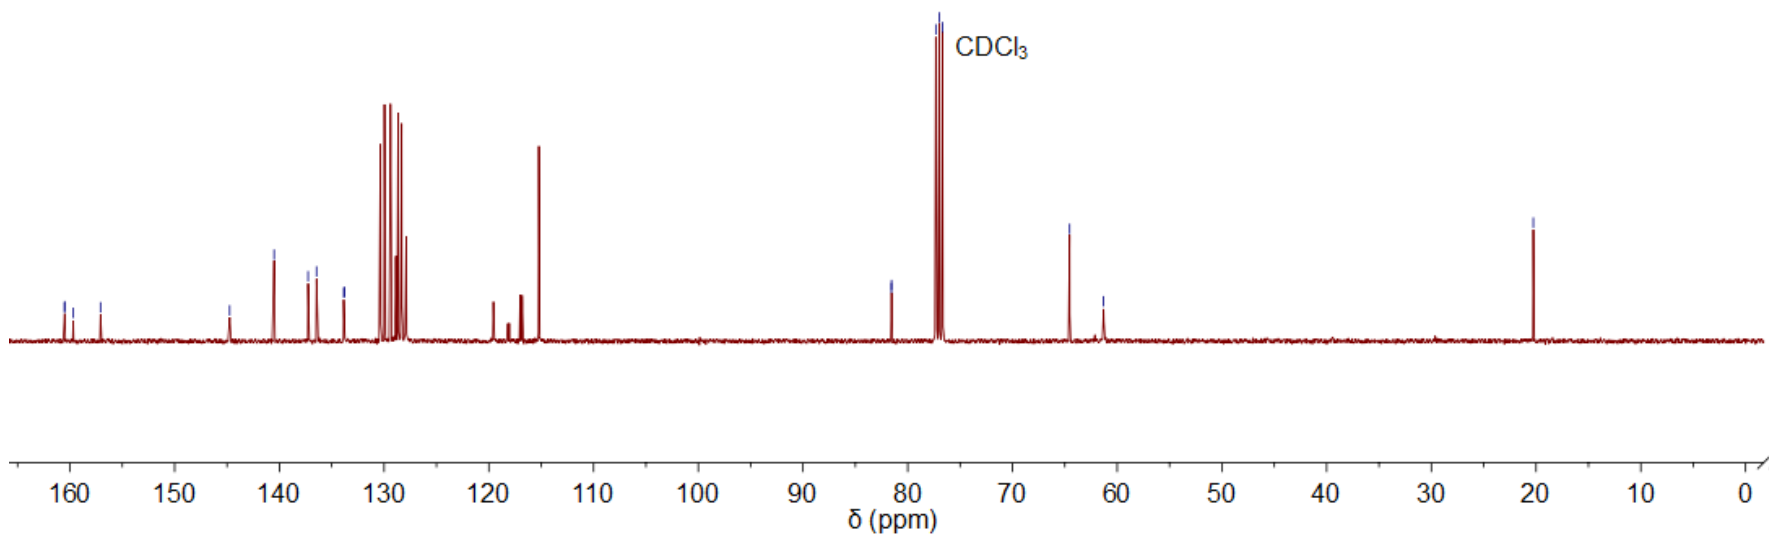

3i - <sup>13</sup>C NMR

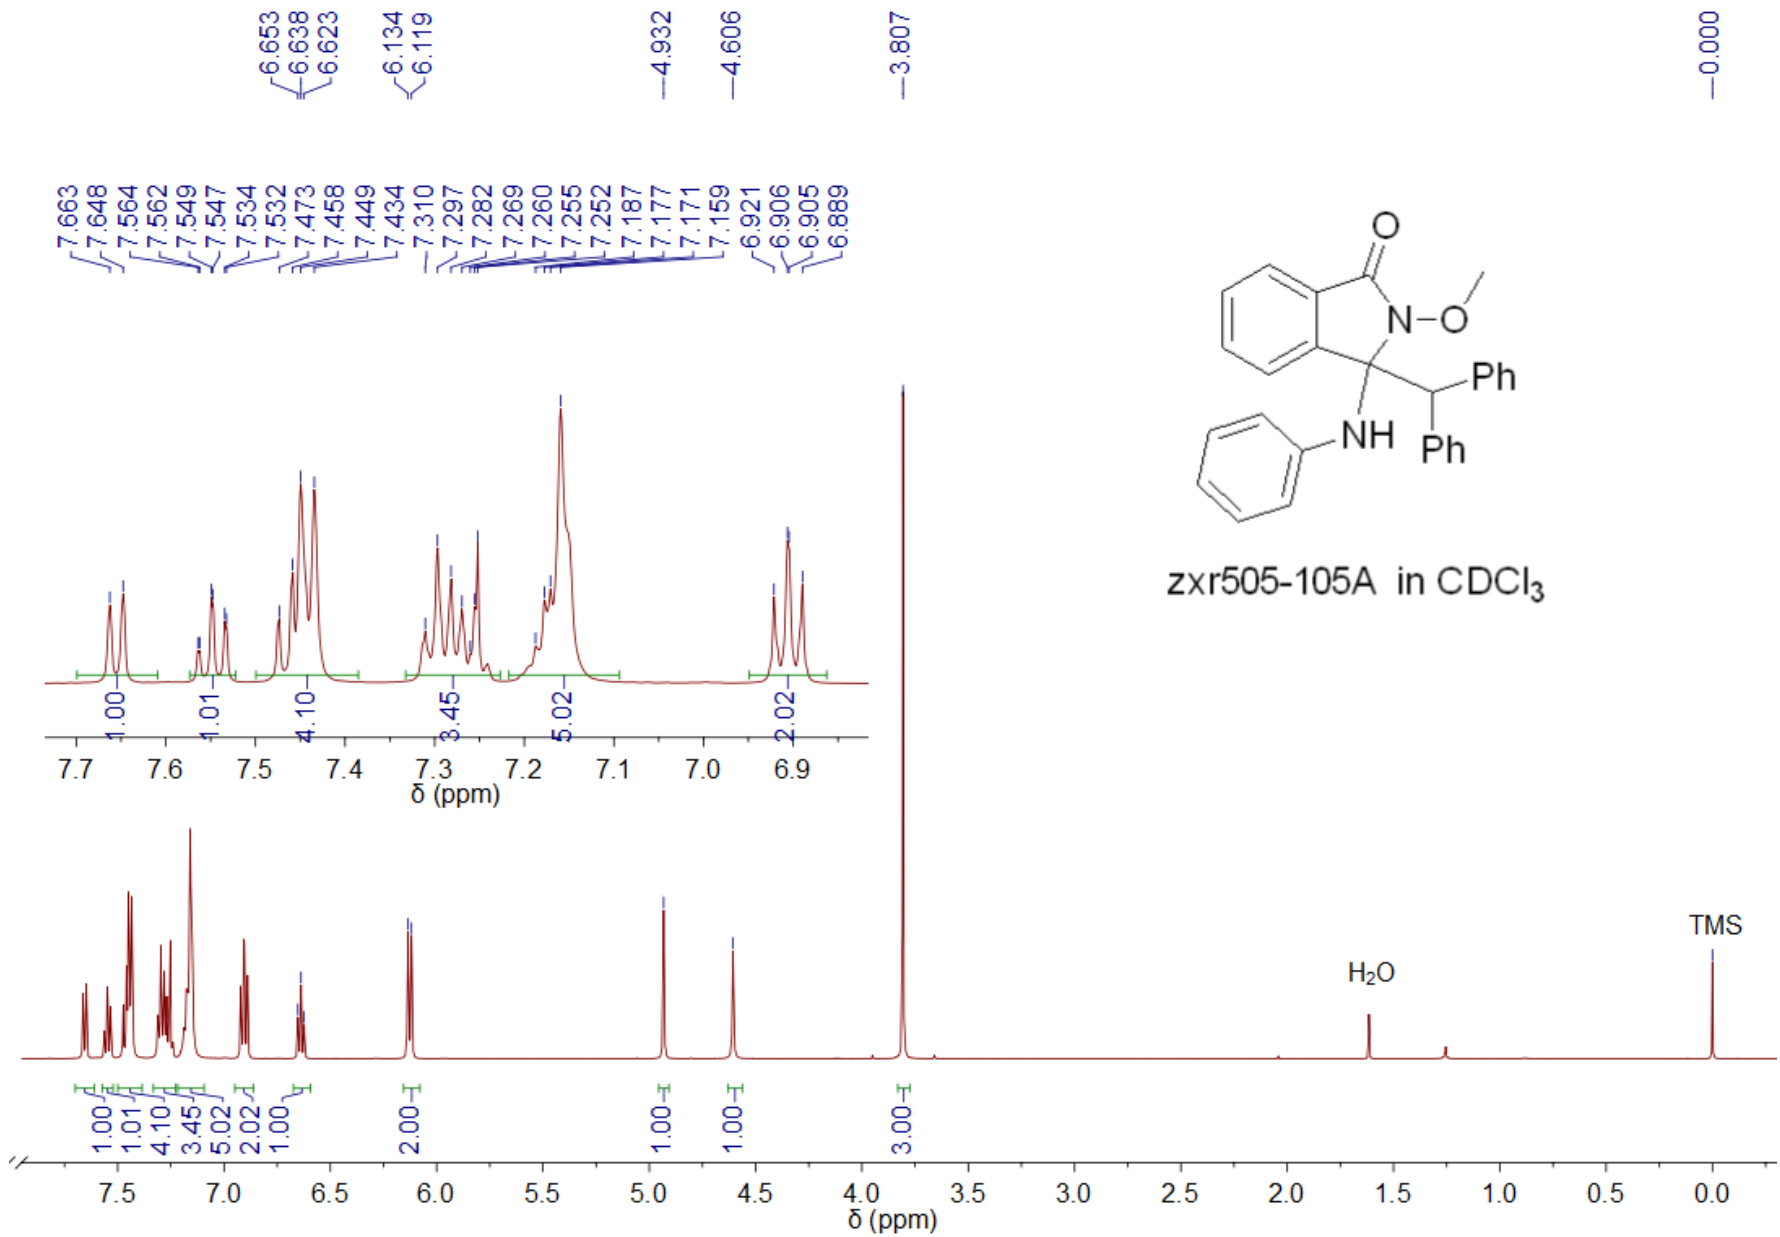

**3j** - <sup>1</sup>H NMR

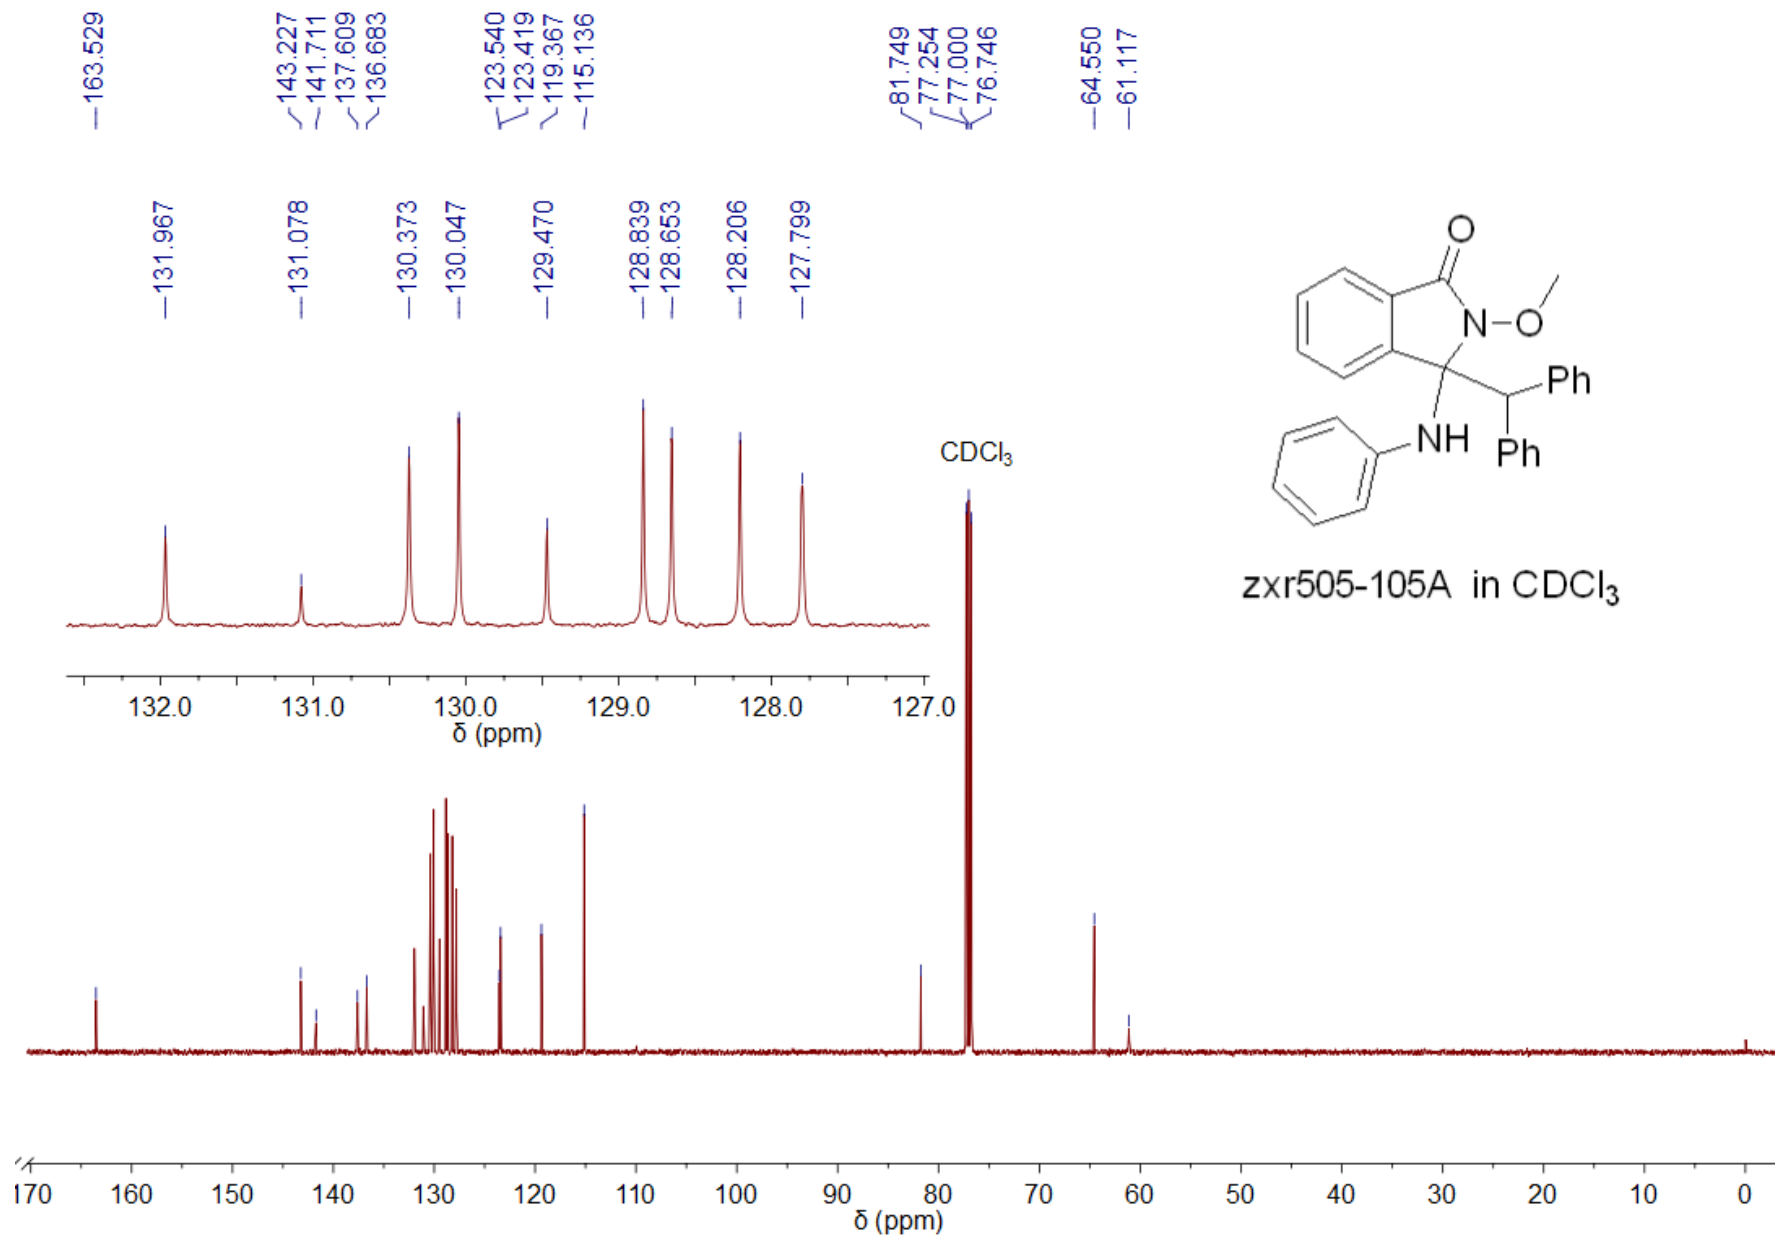

**3j** – <sup>13</sup>C NMR



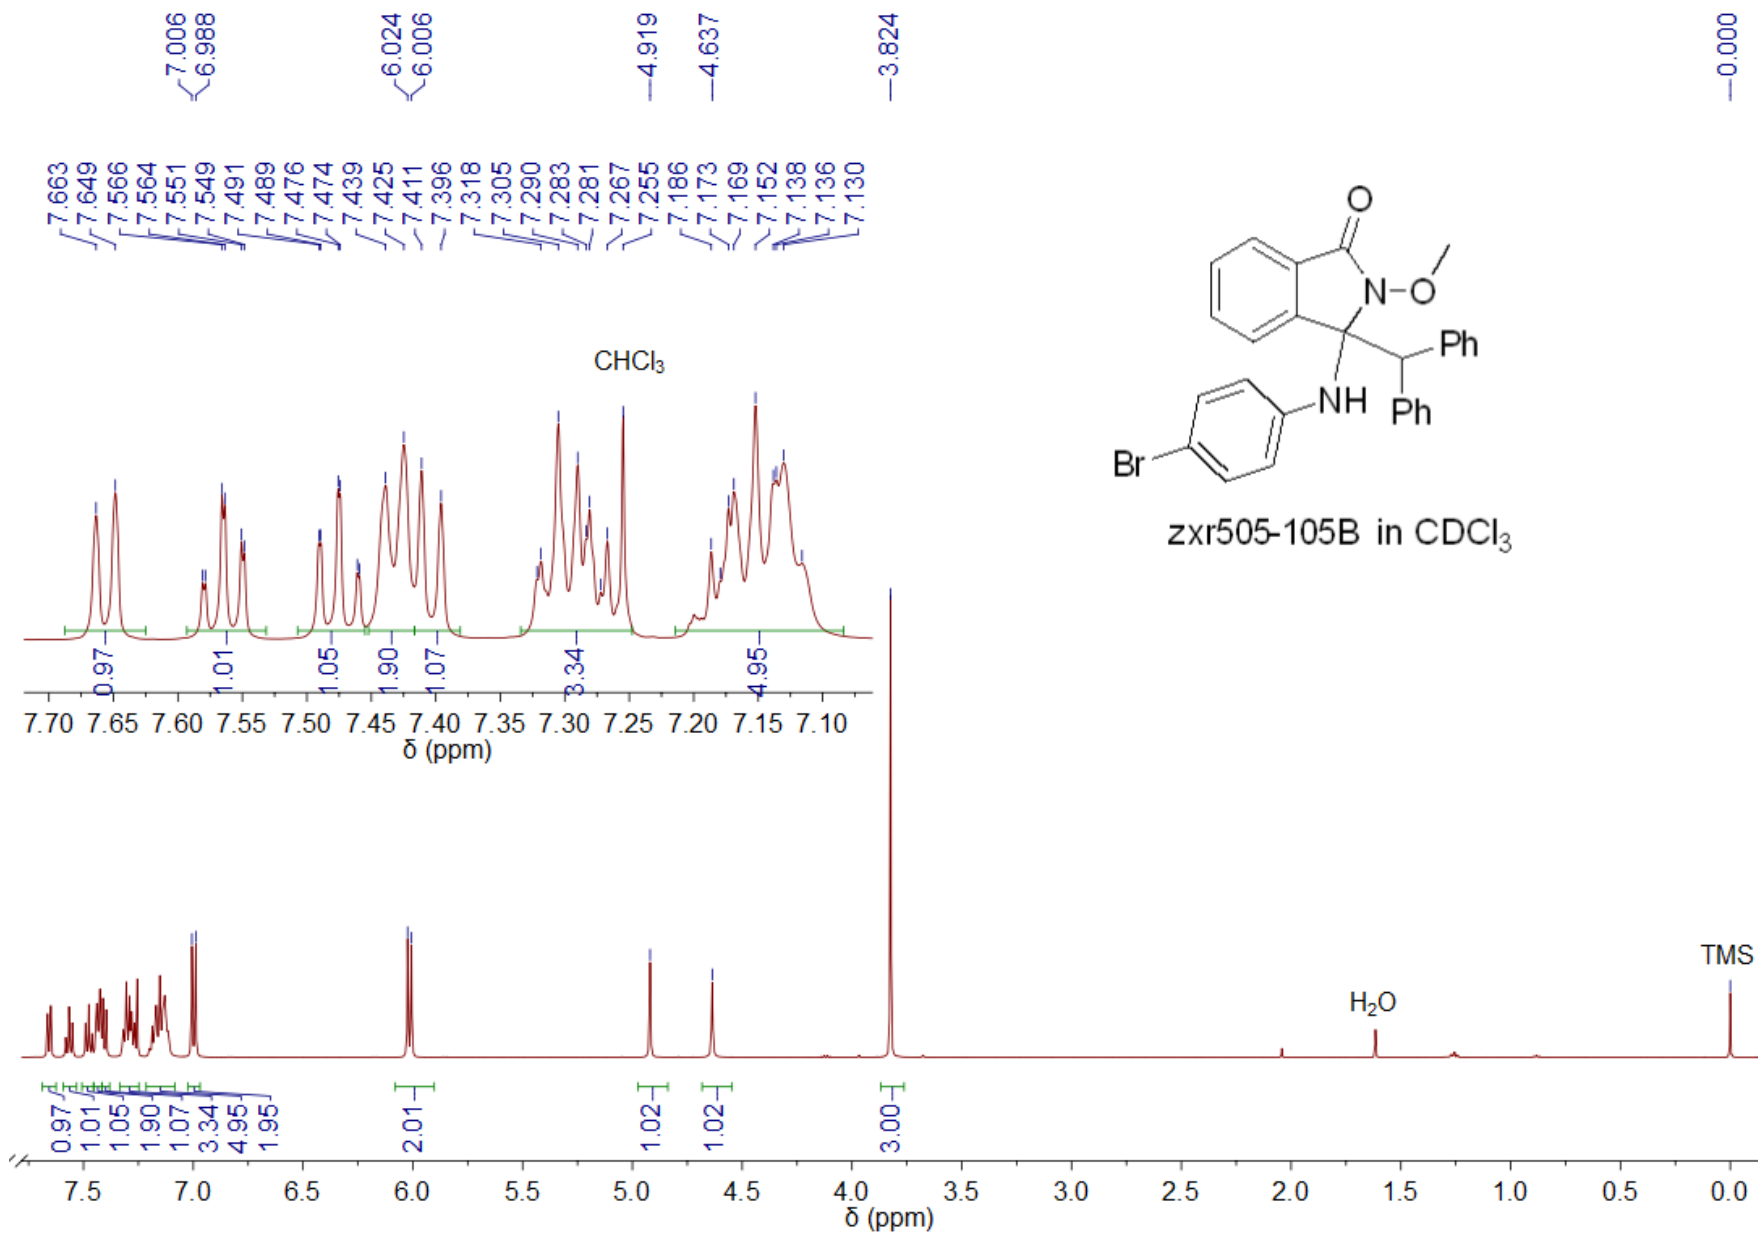

**3k** - <sup>1</sup>H NMR

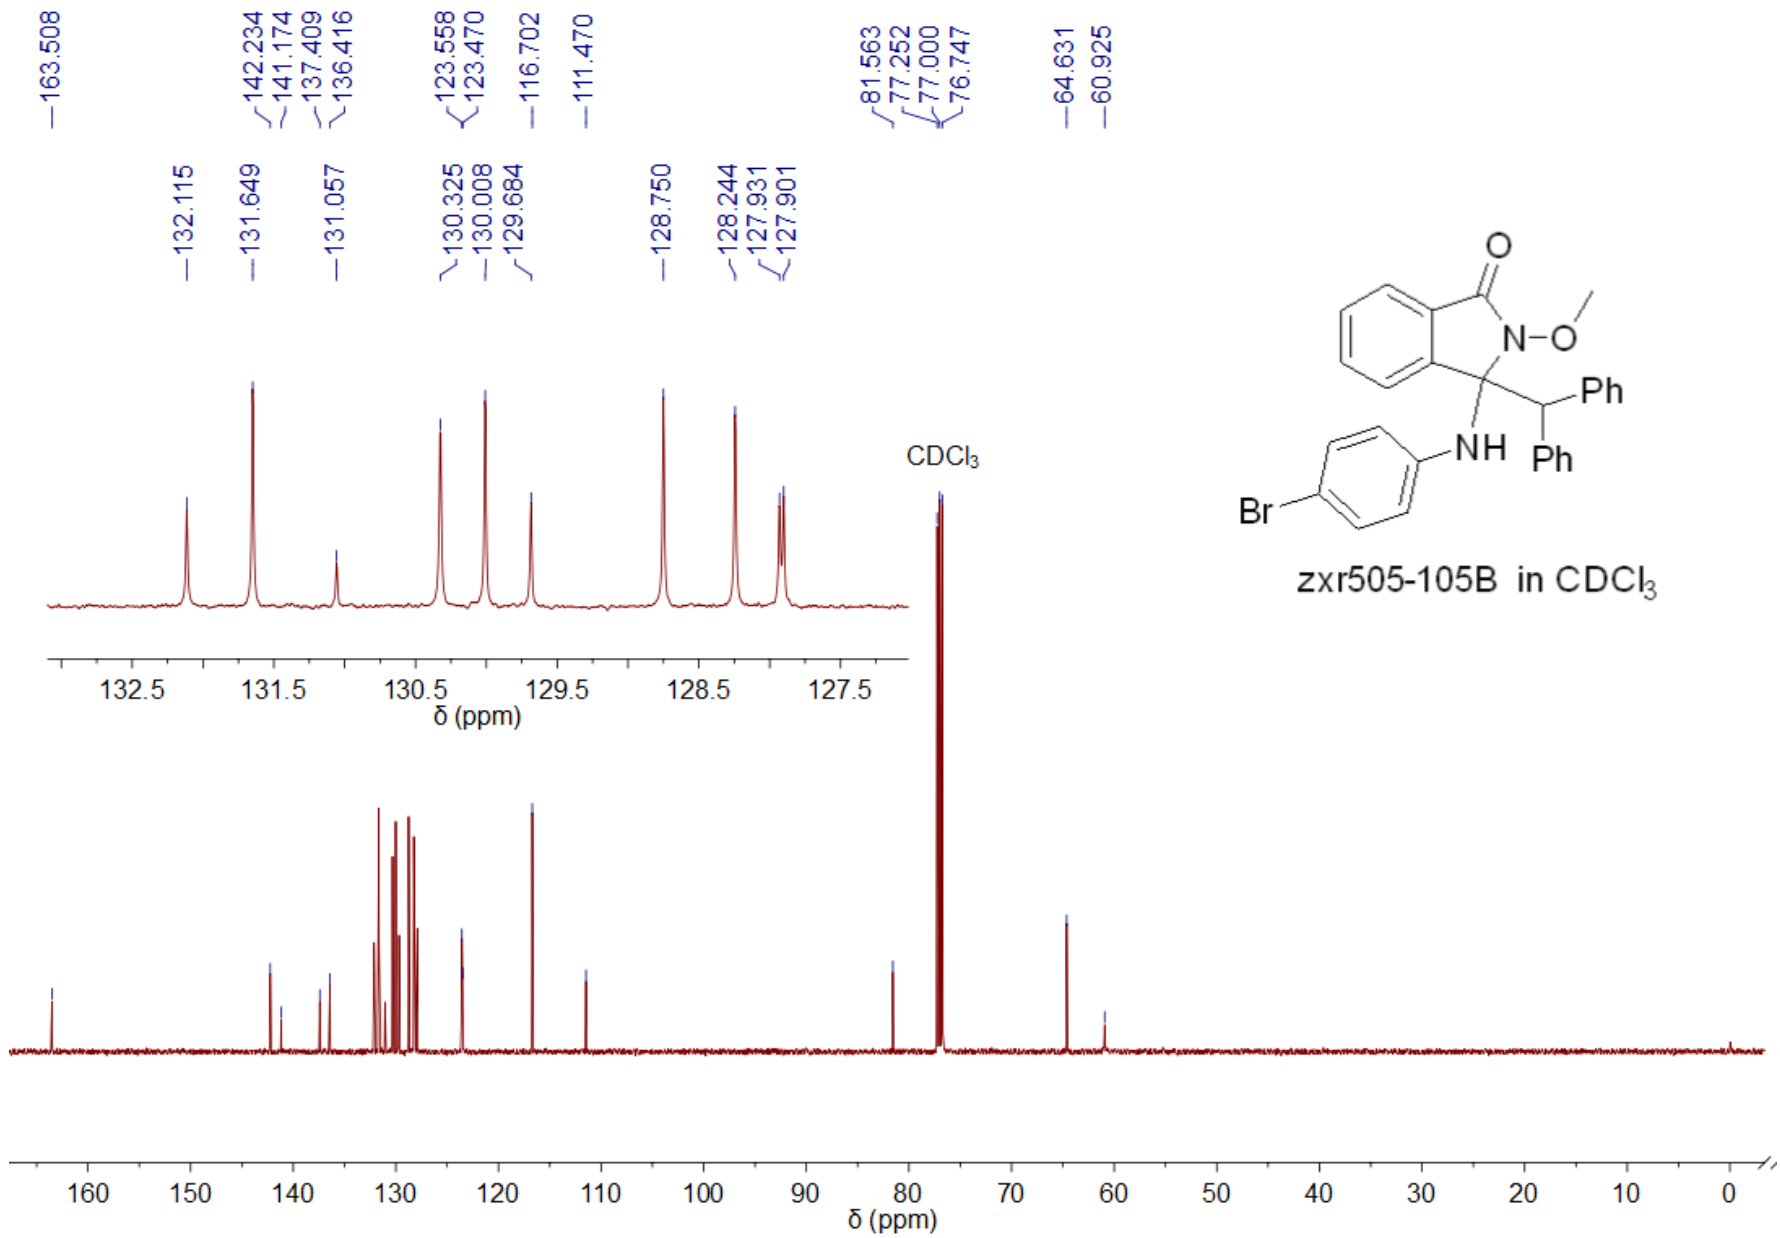

**3k** – <sup>13</sup>C NMR

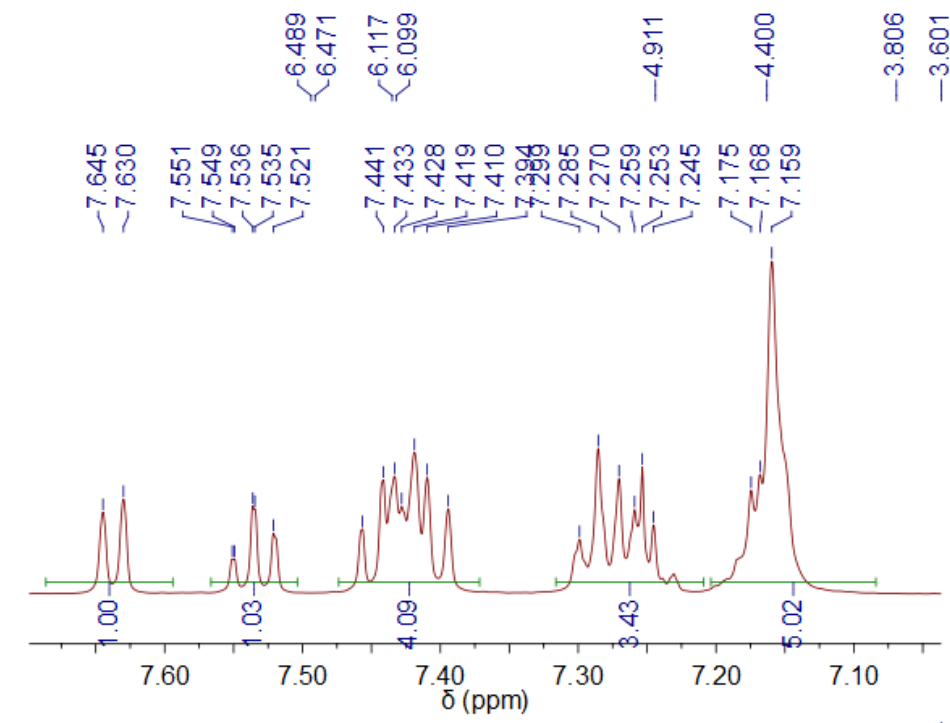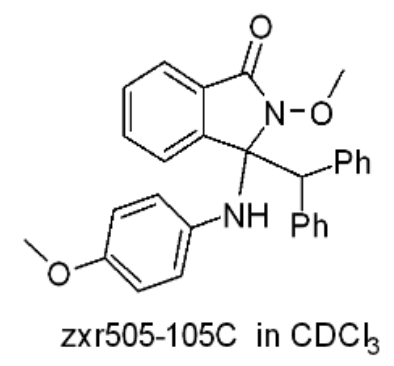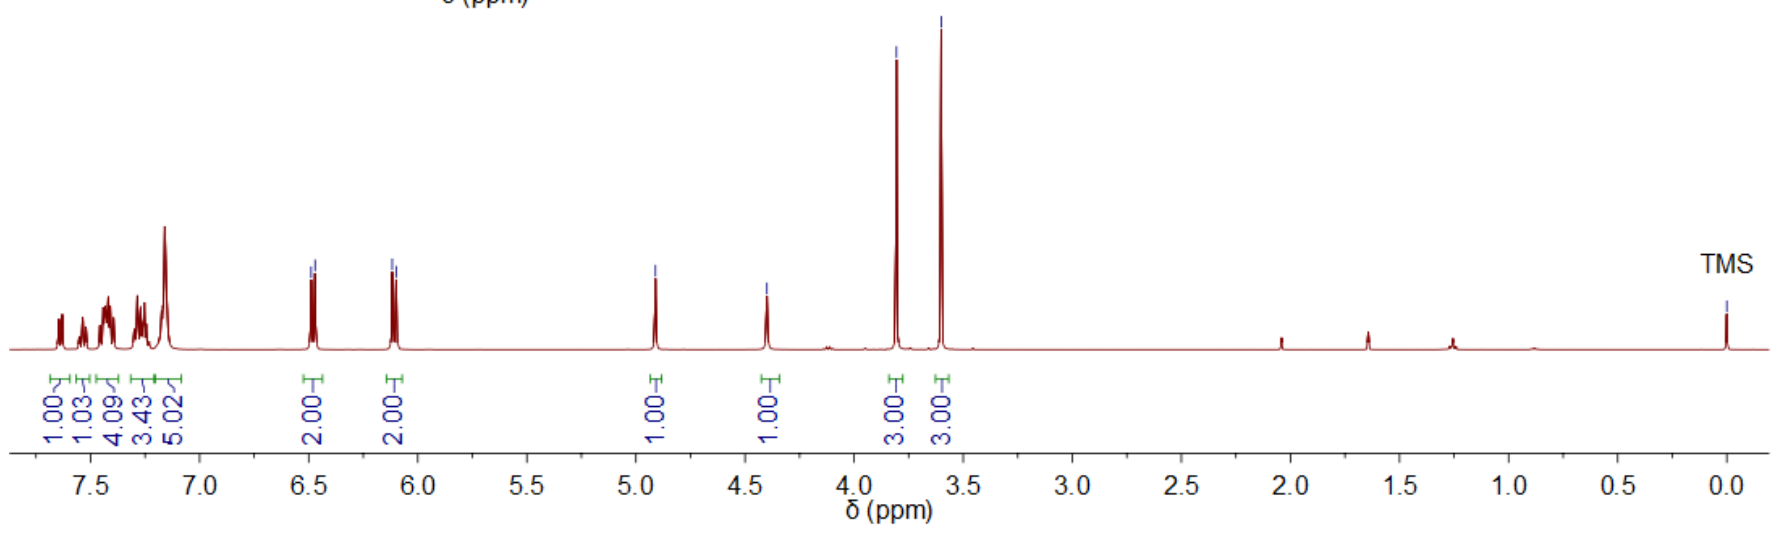

**3I** - <sup>1</sup>H NMR

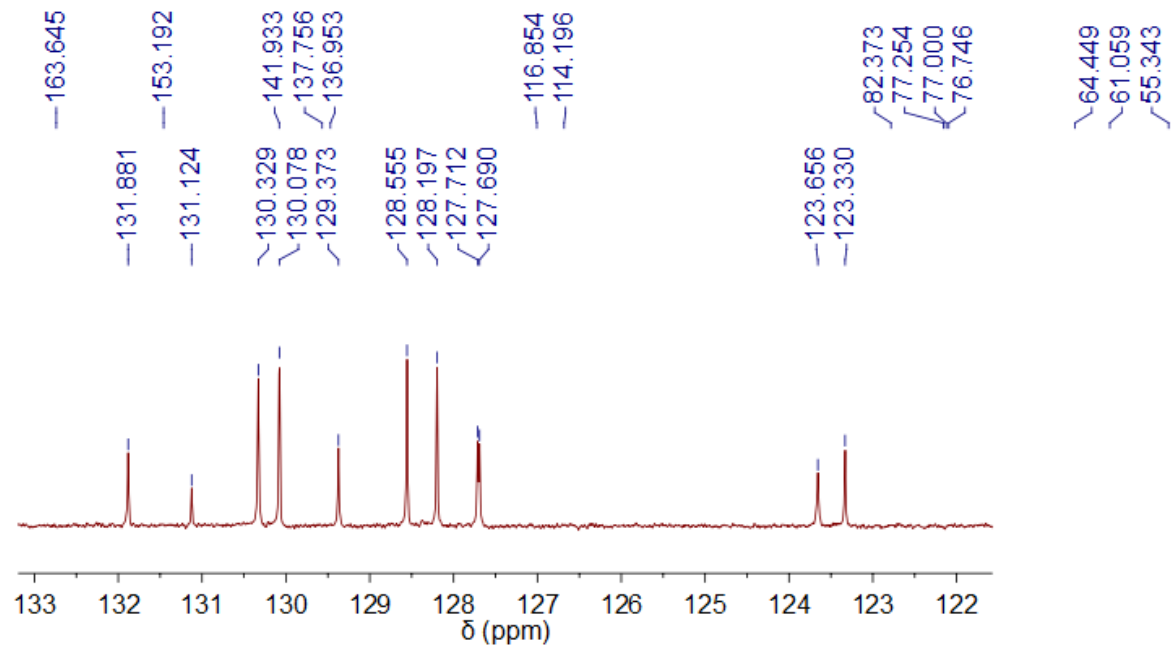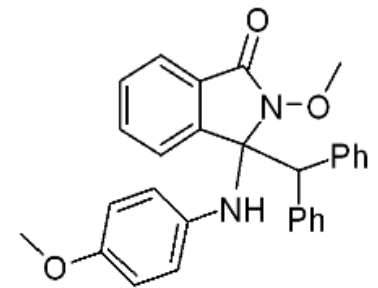

zxr505-105C in CDCl<sub>3</sub>

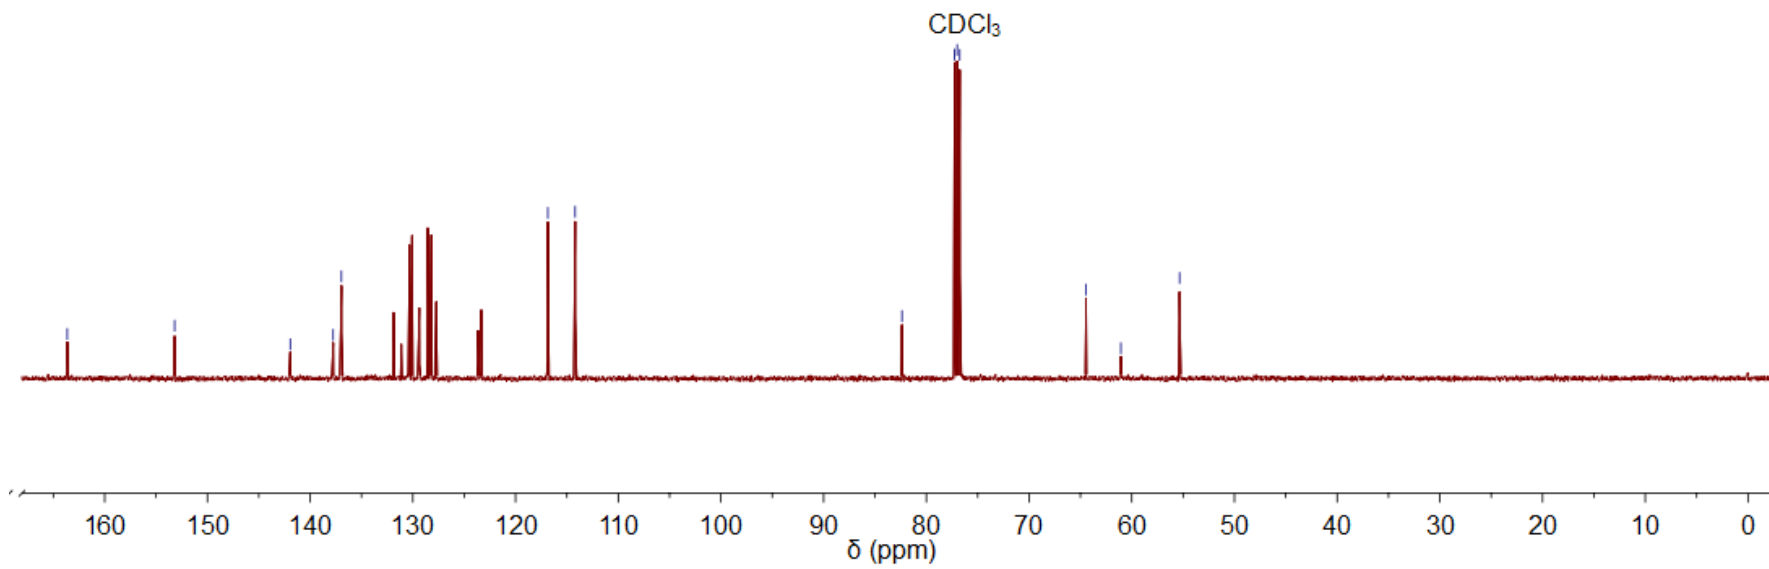

3I - <sup>13</sup>C NMR

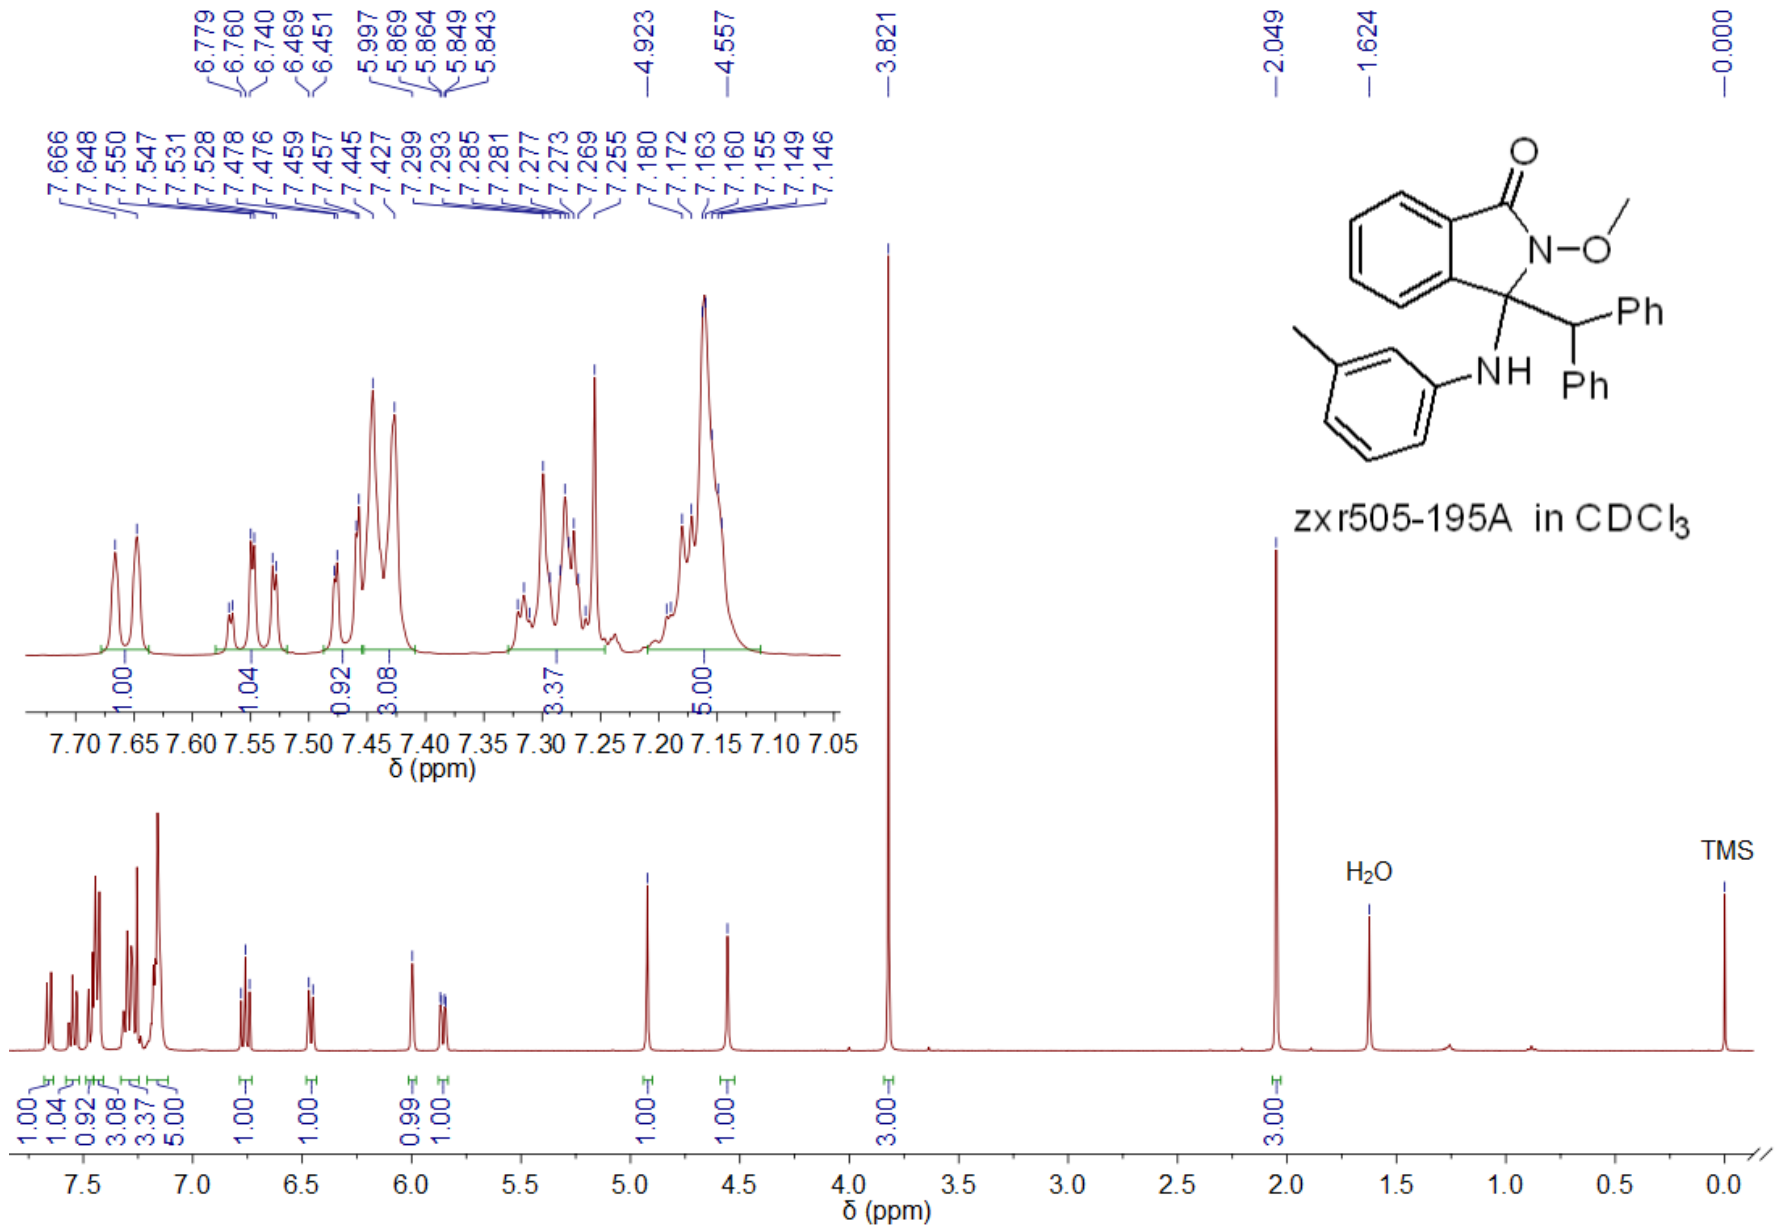

**3m** - <sup>1</sup>H NMR

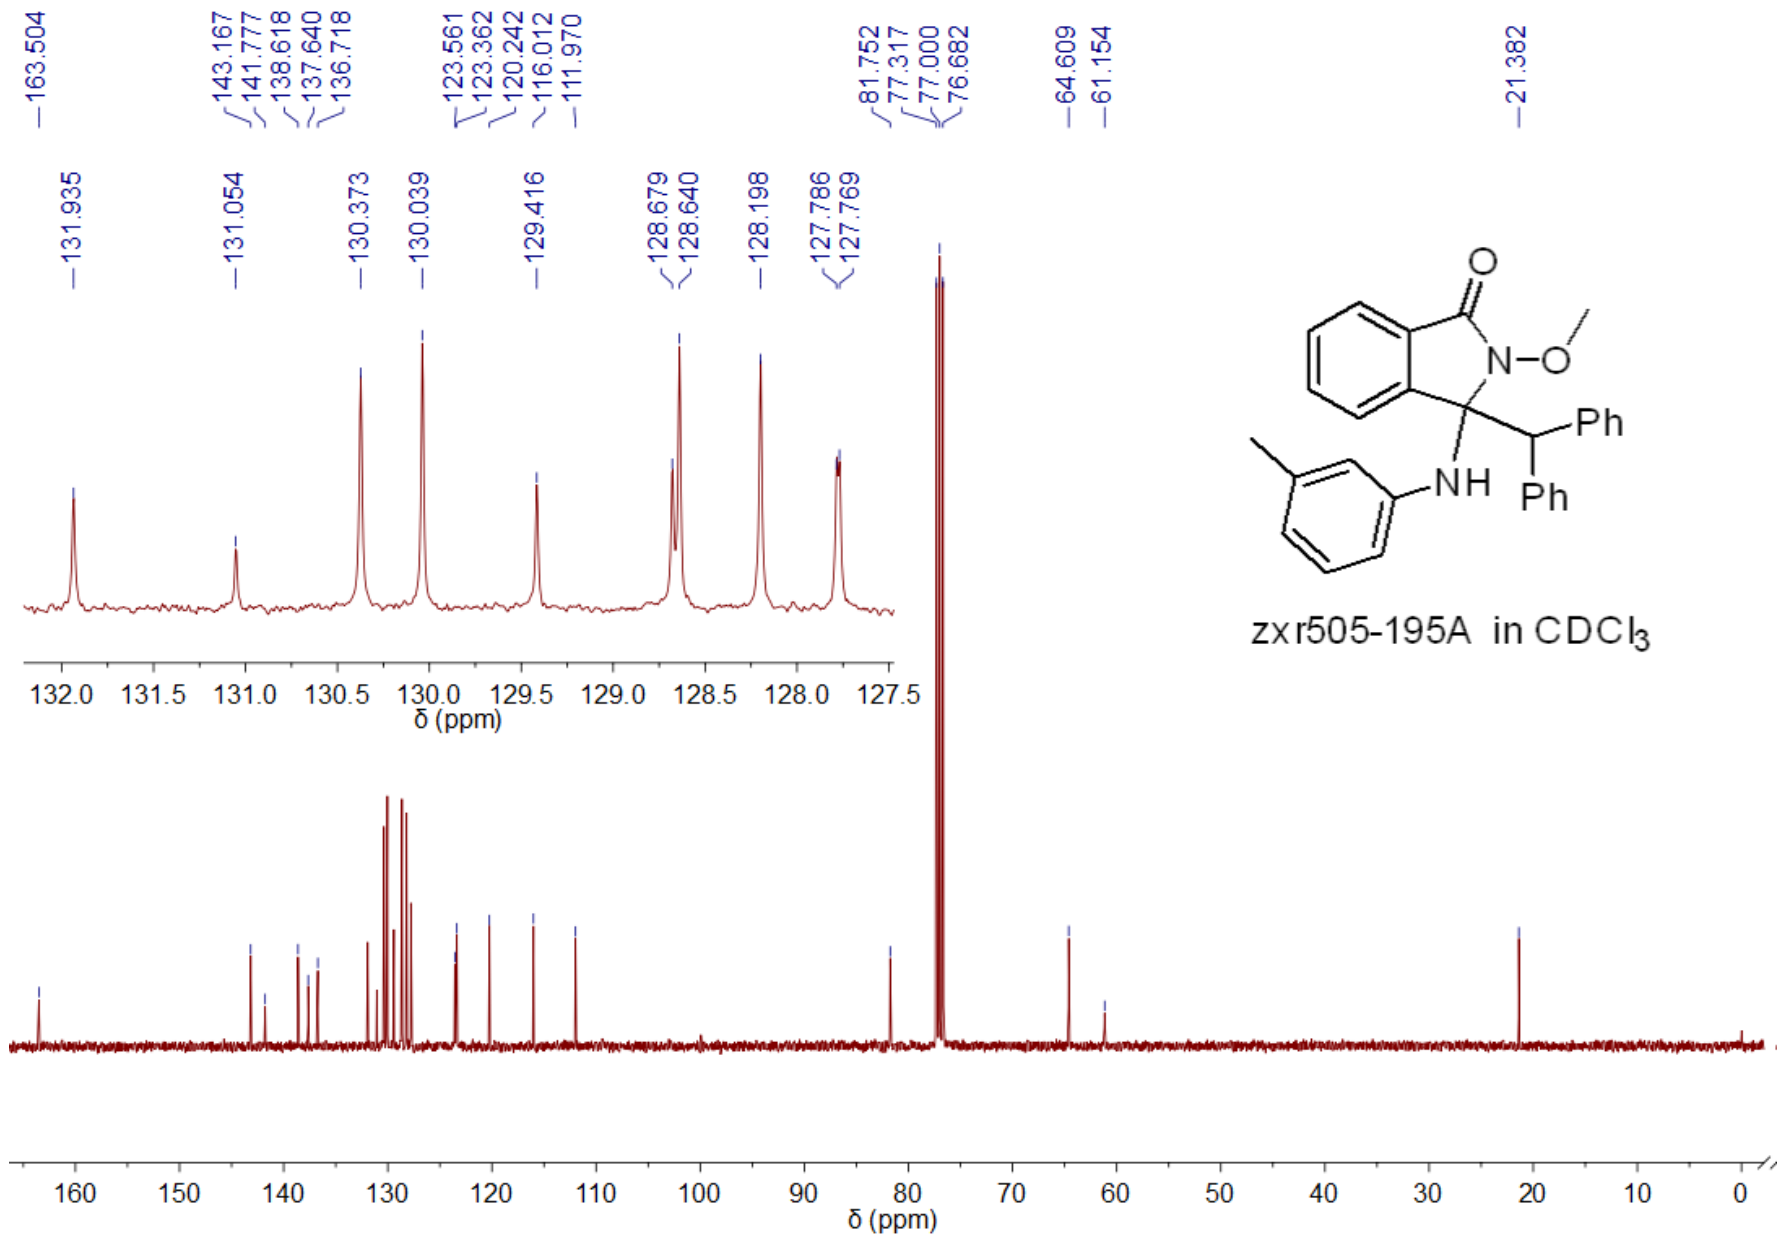

3m -  $^{13}\text{C}$  NMR

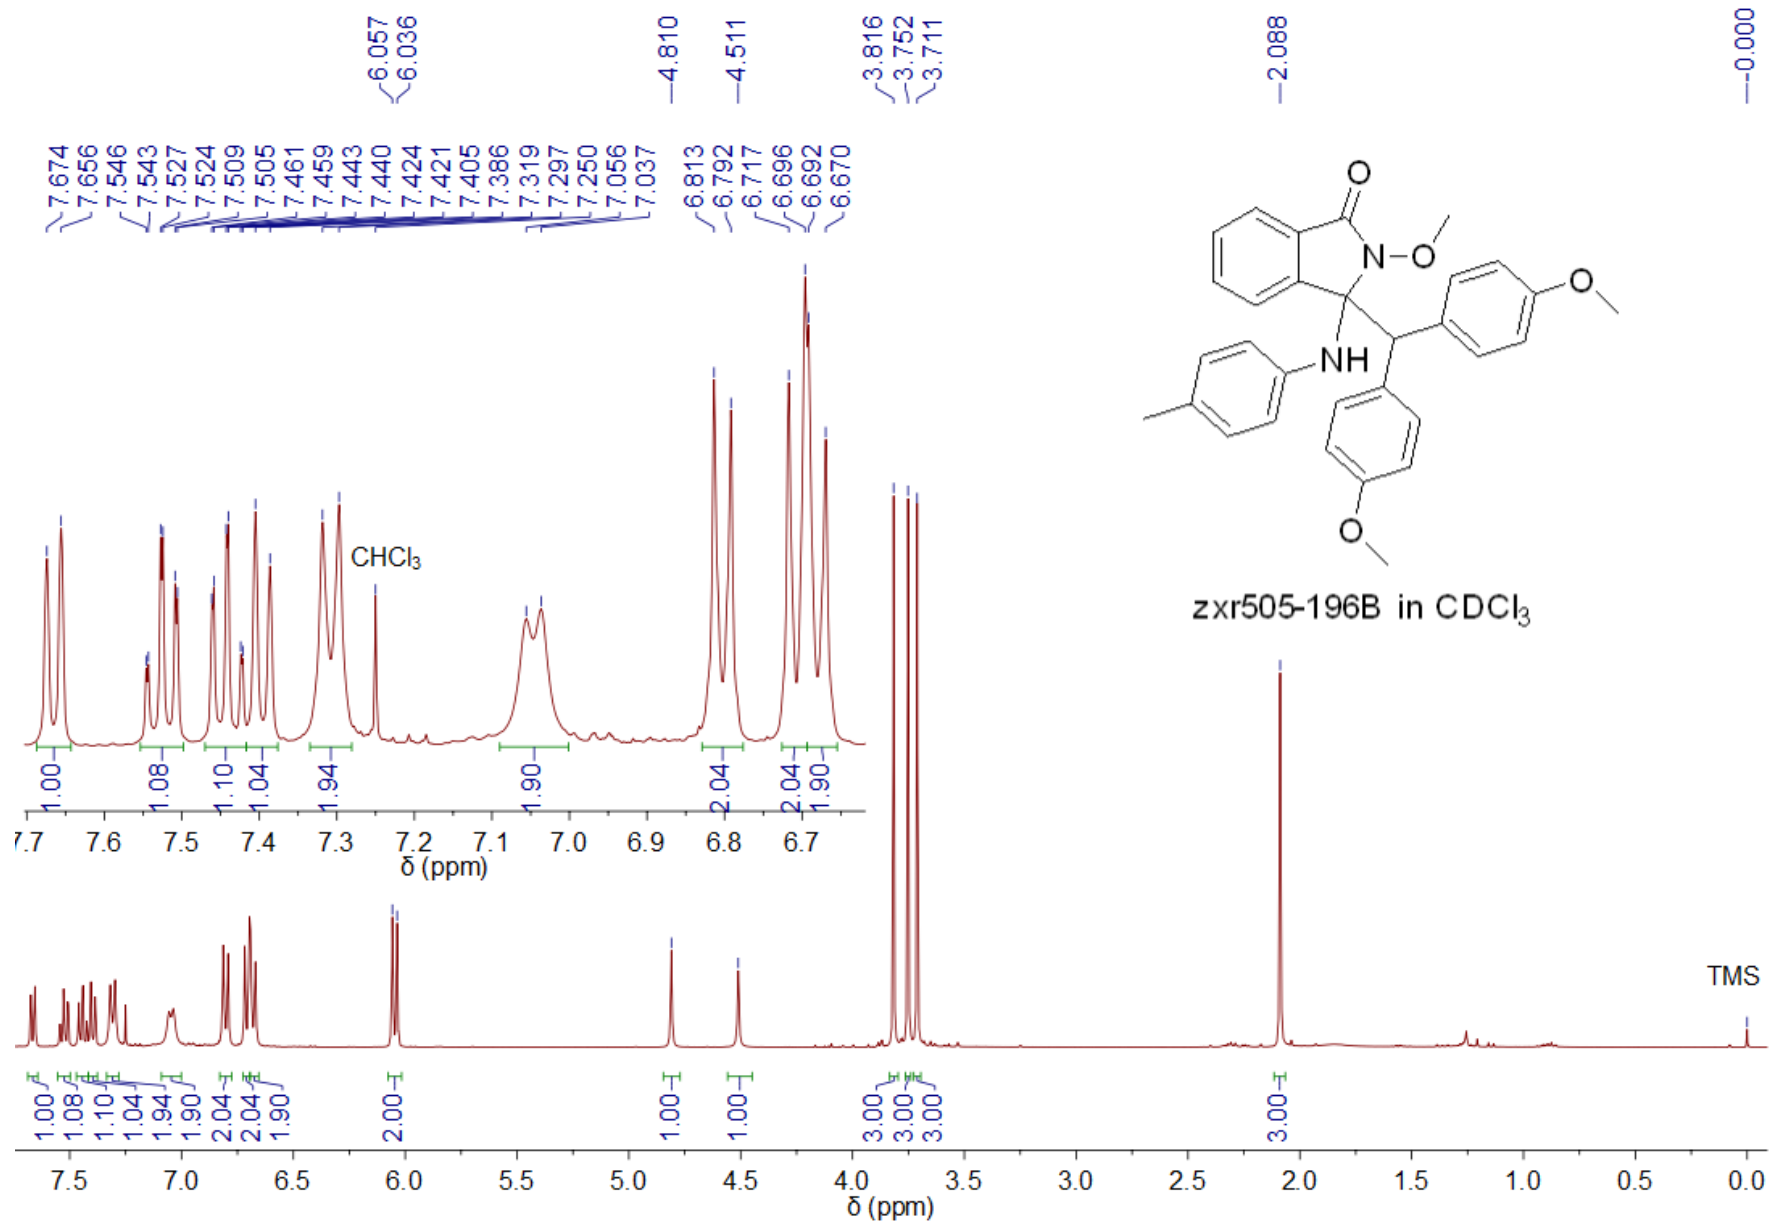

**3n** - <sup>1</sup>H NMR

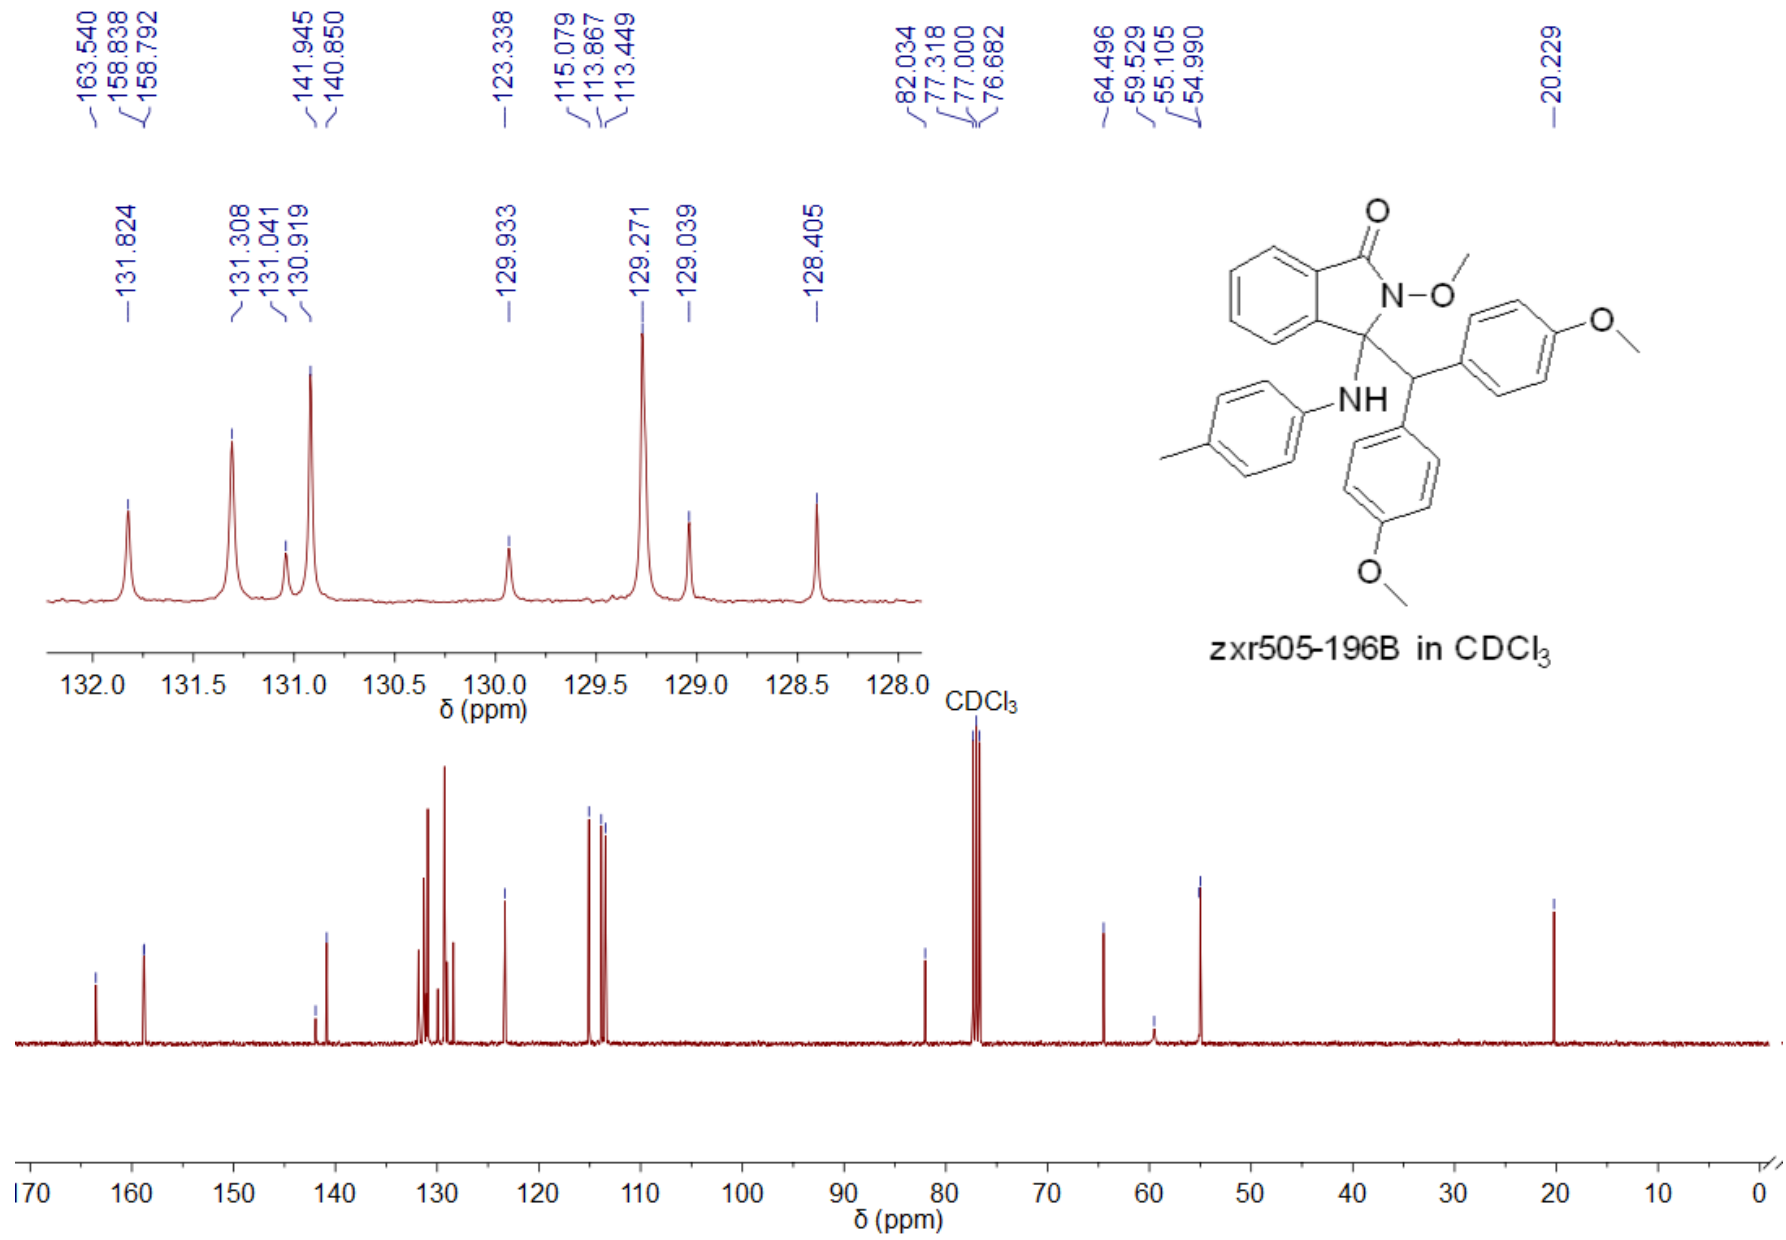

**3n** – <sup>13</sup>C NMR



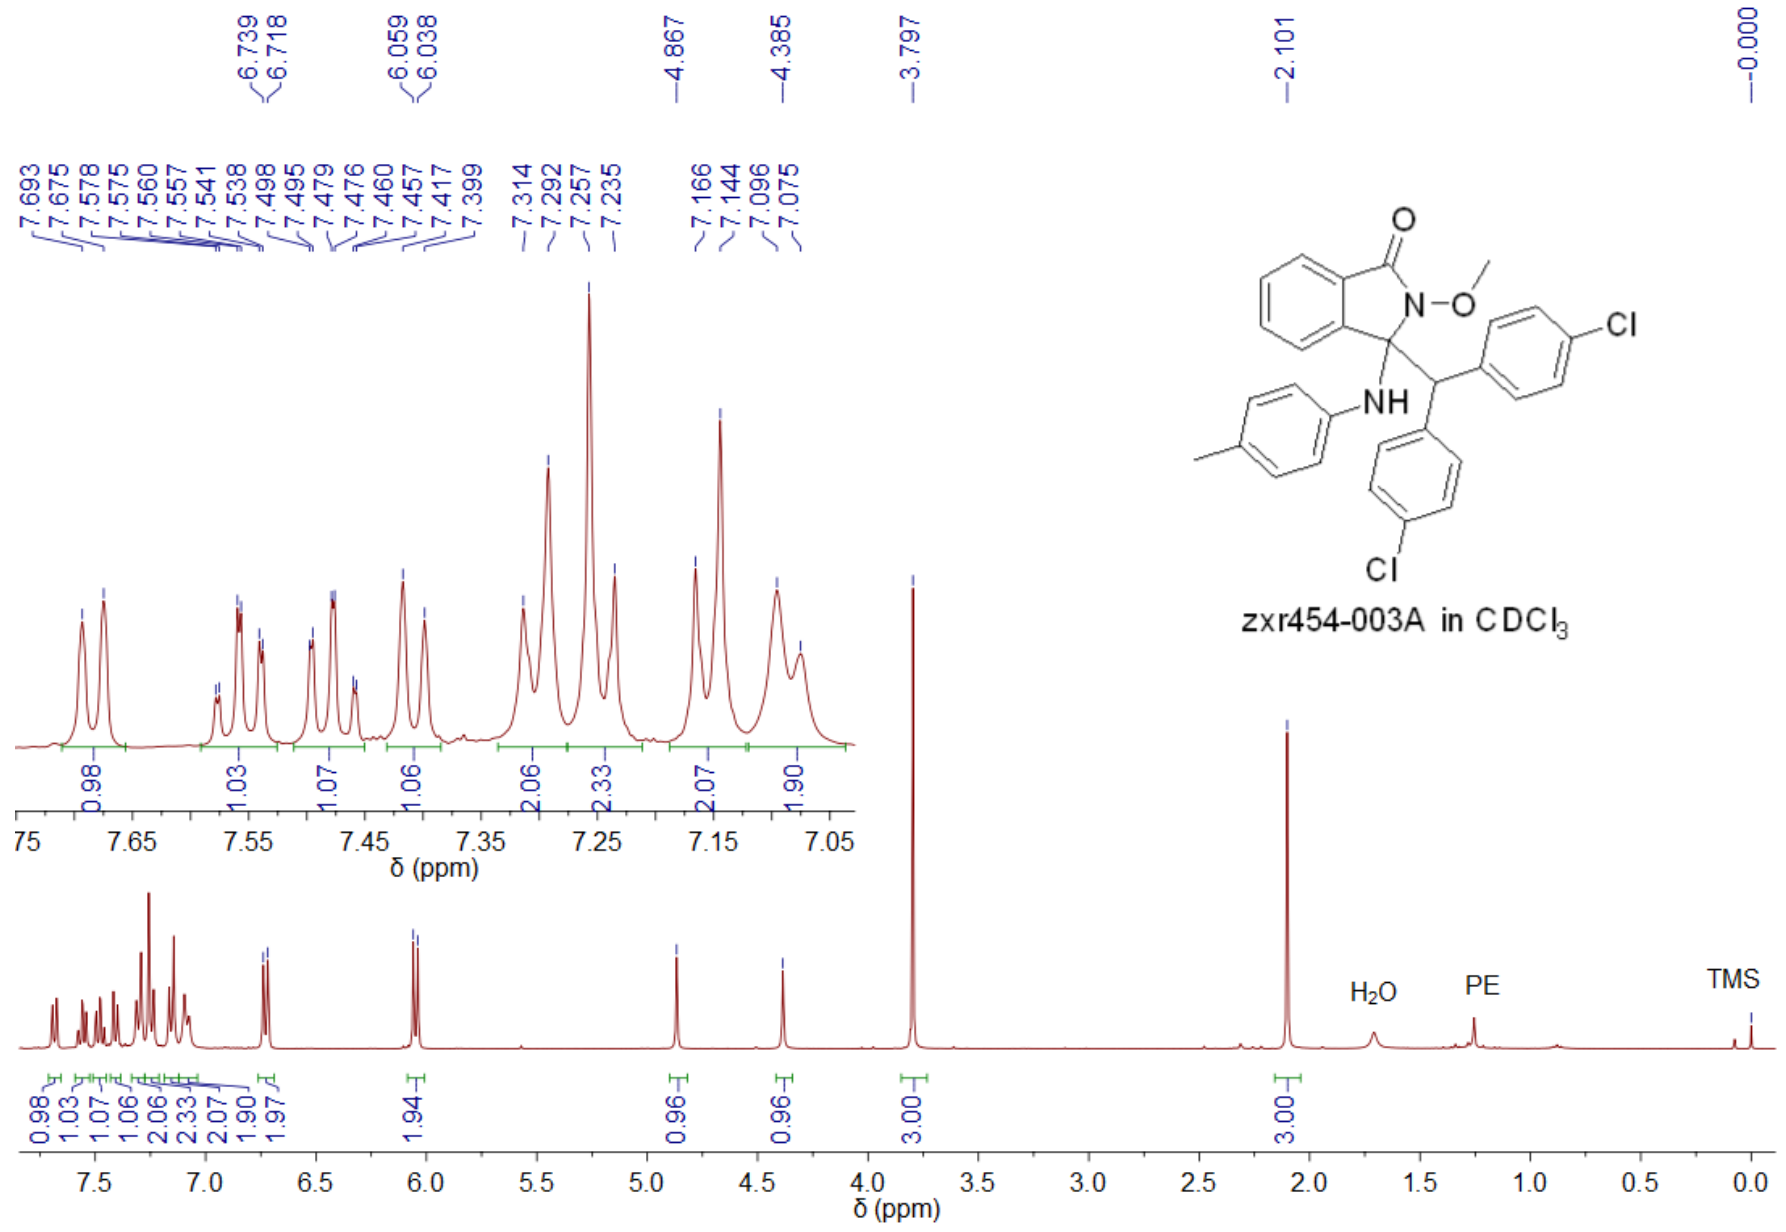

**3o** -  $^1\text{H NMR}$

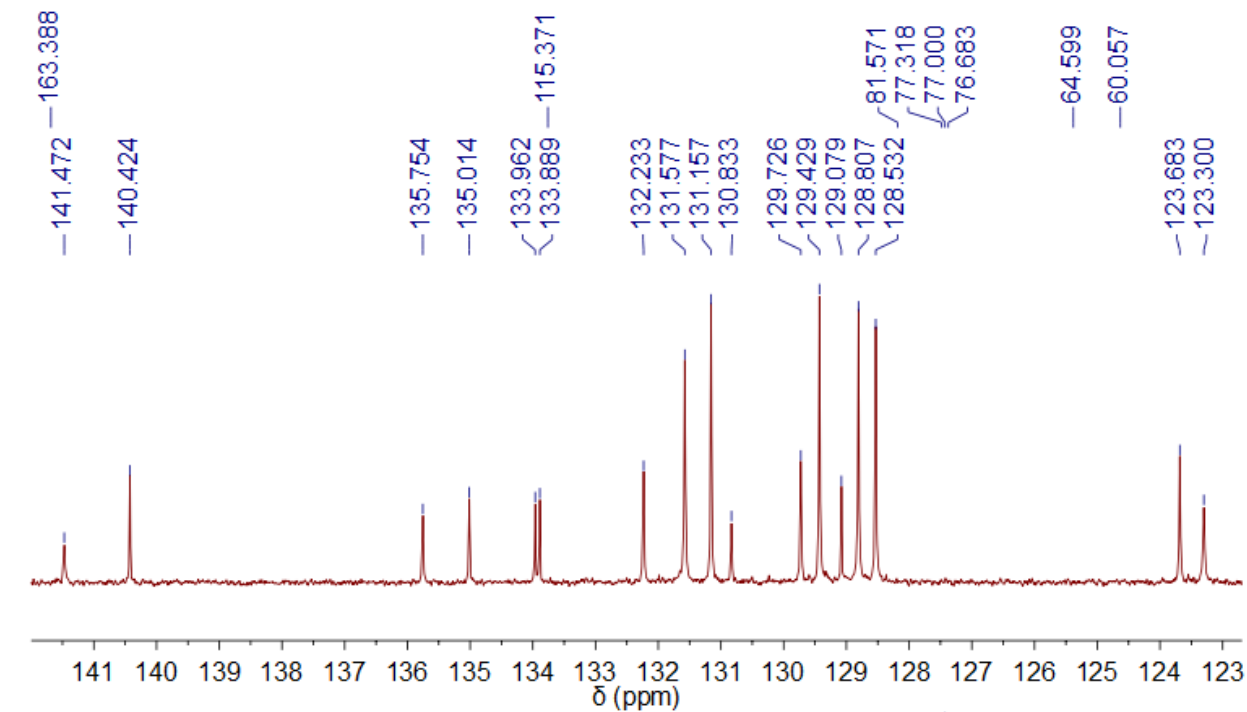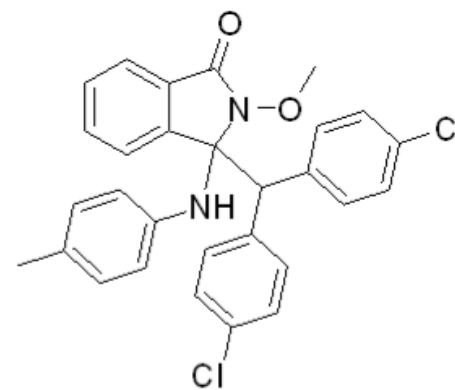

zxr454-003A in CDCl<sub>3</sub>

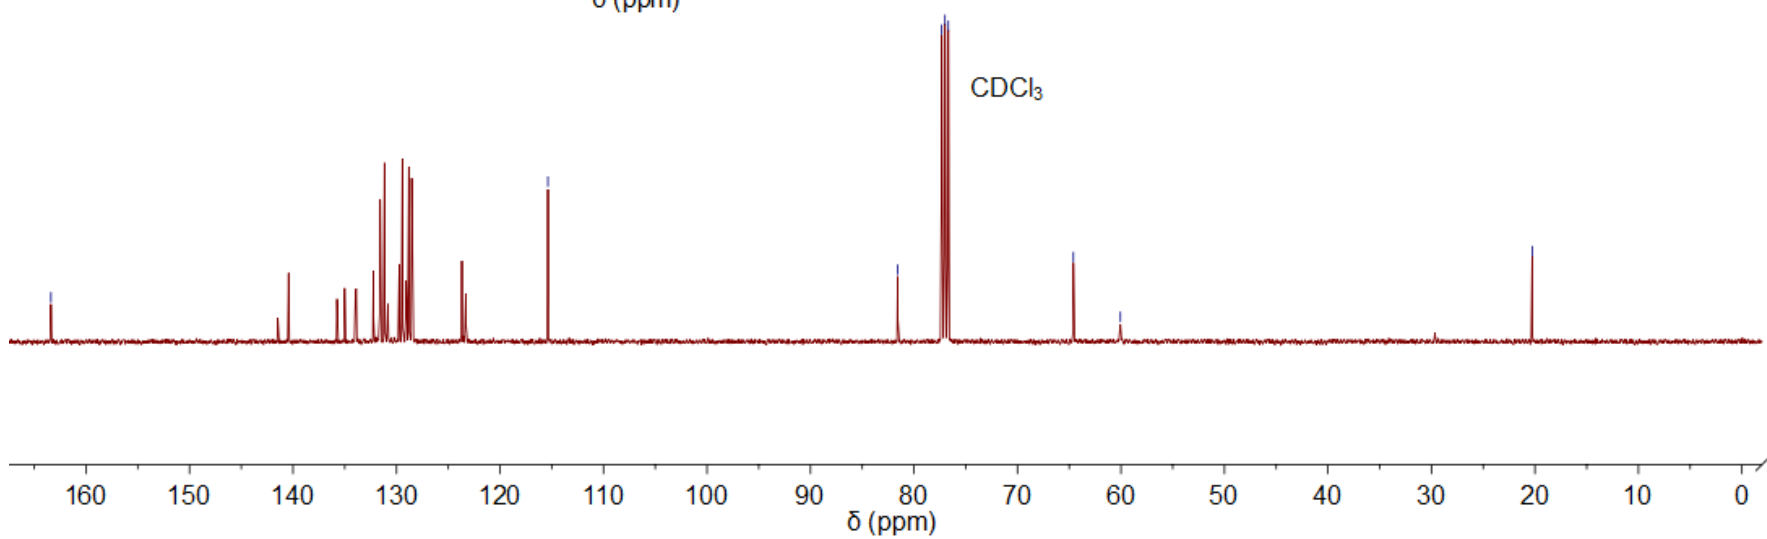

3o - <sup>13</sup>C NMR

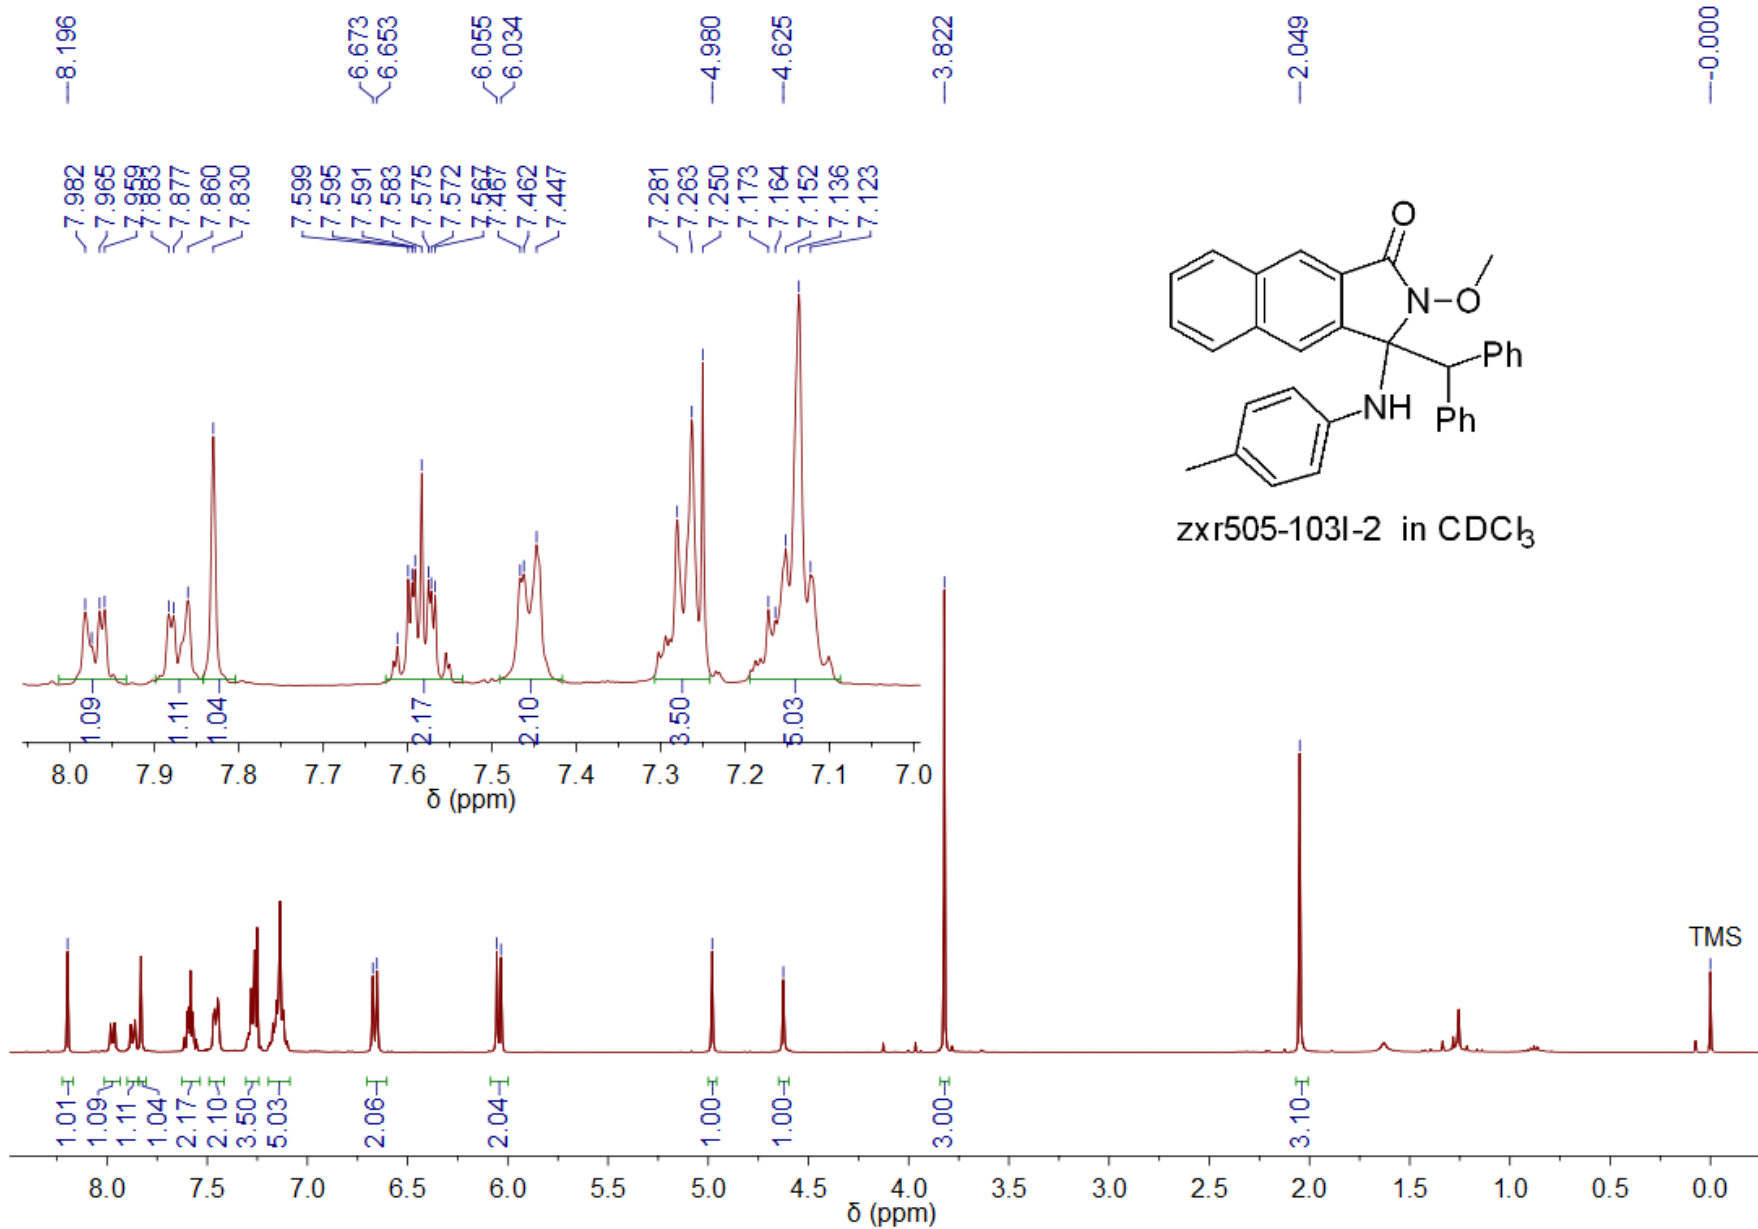

**3pa** -  $^1\text{H}$  NMR

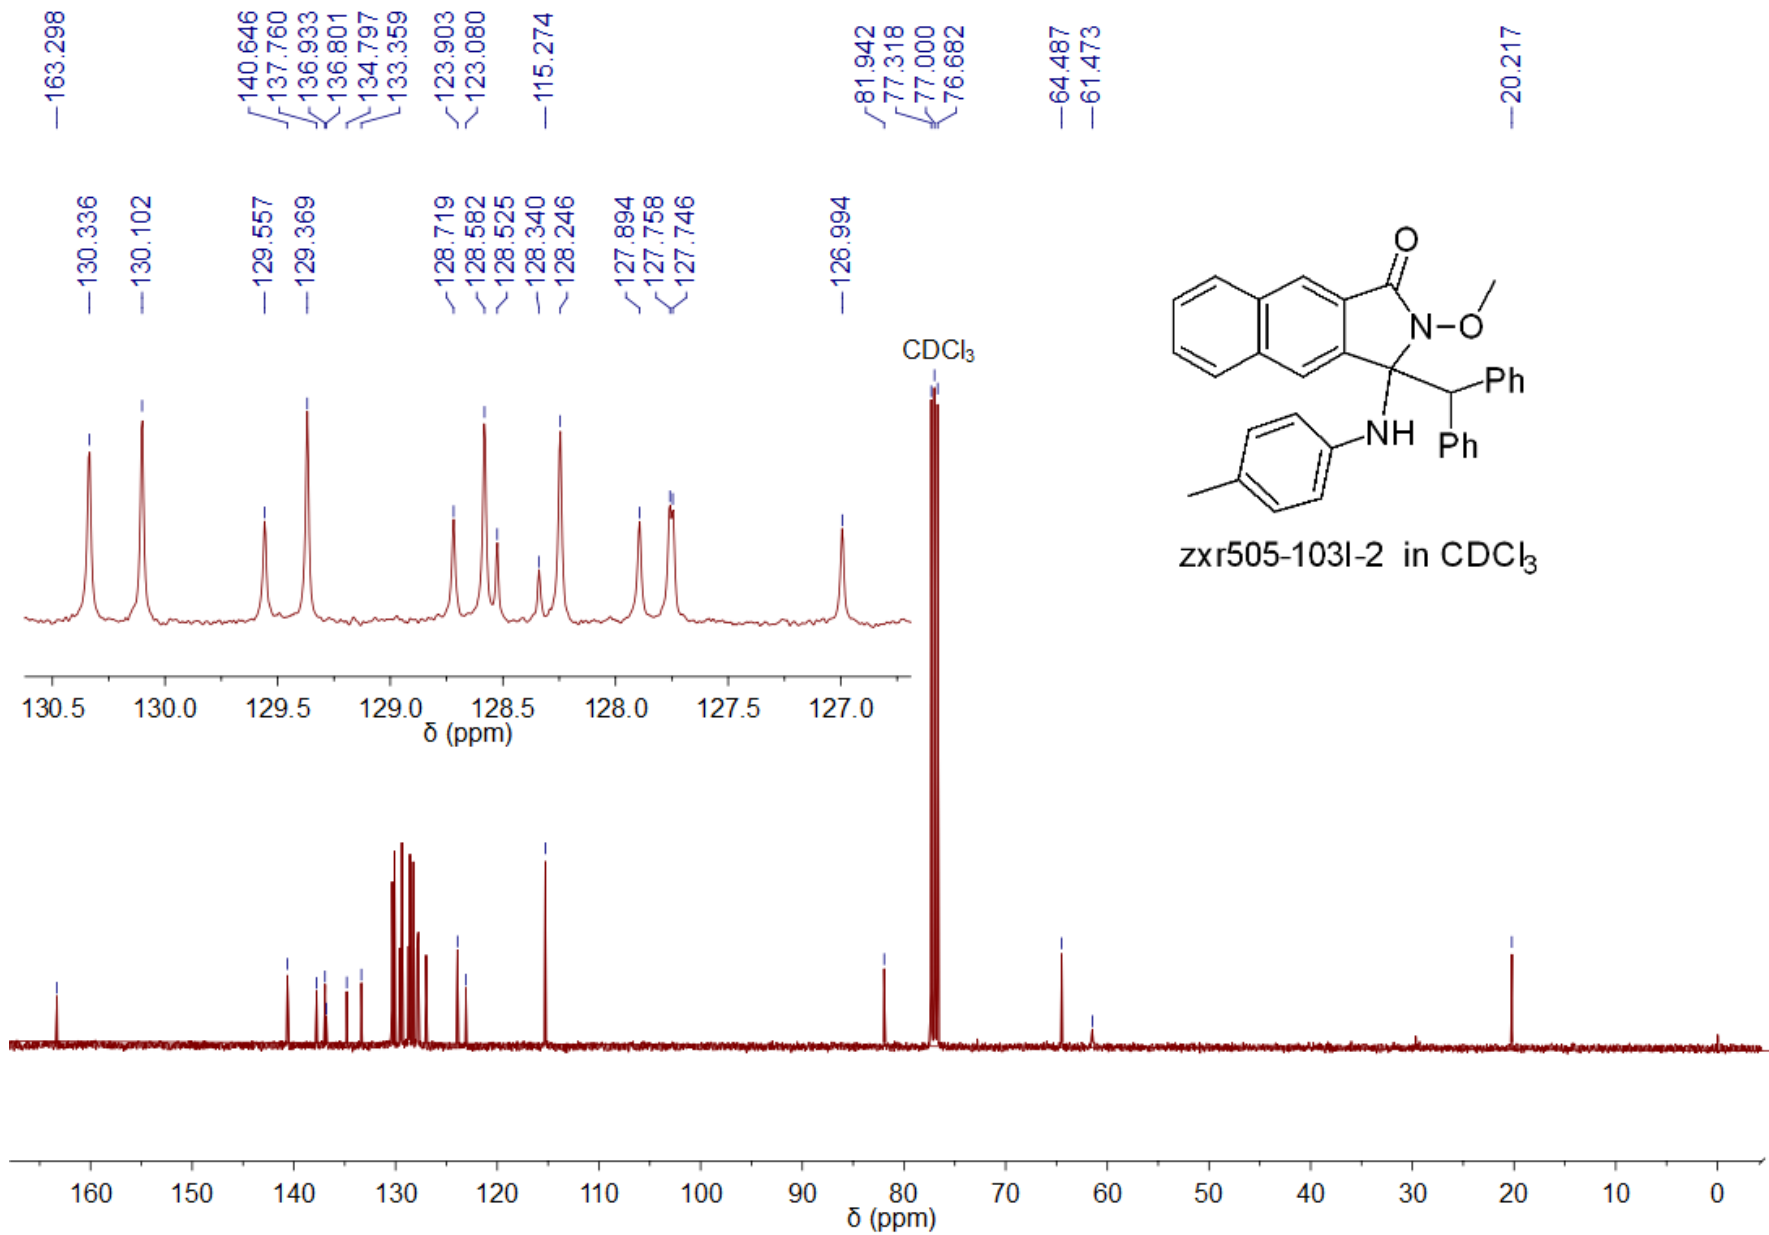

**3pa** –  $^{13}\text{C}$  NMR

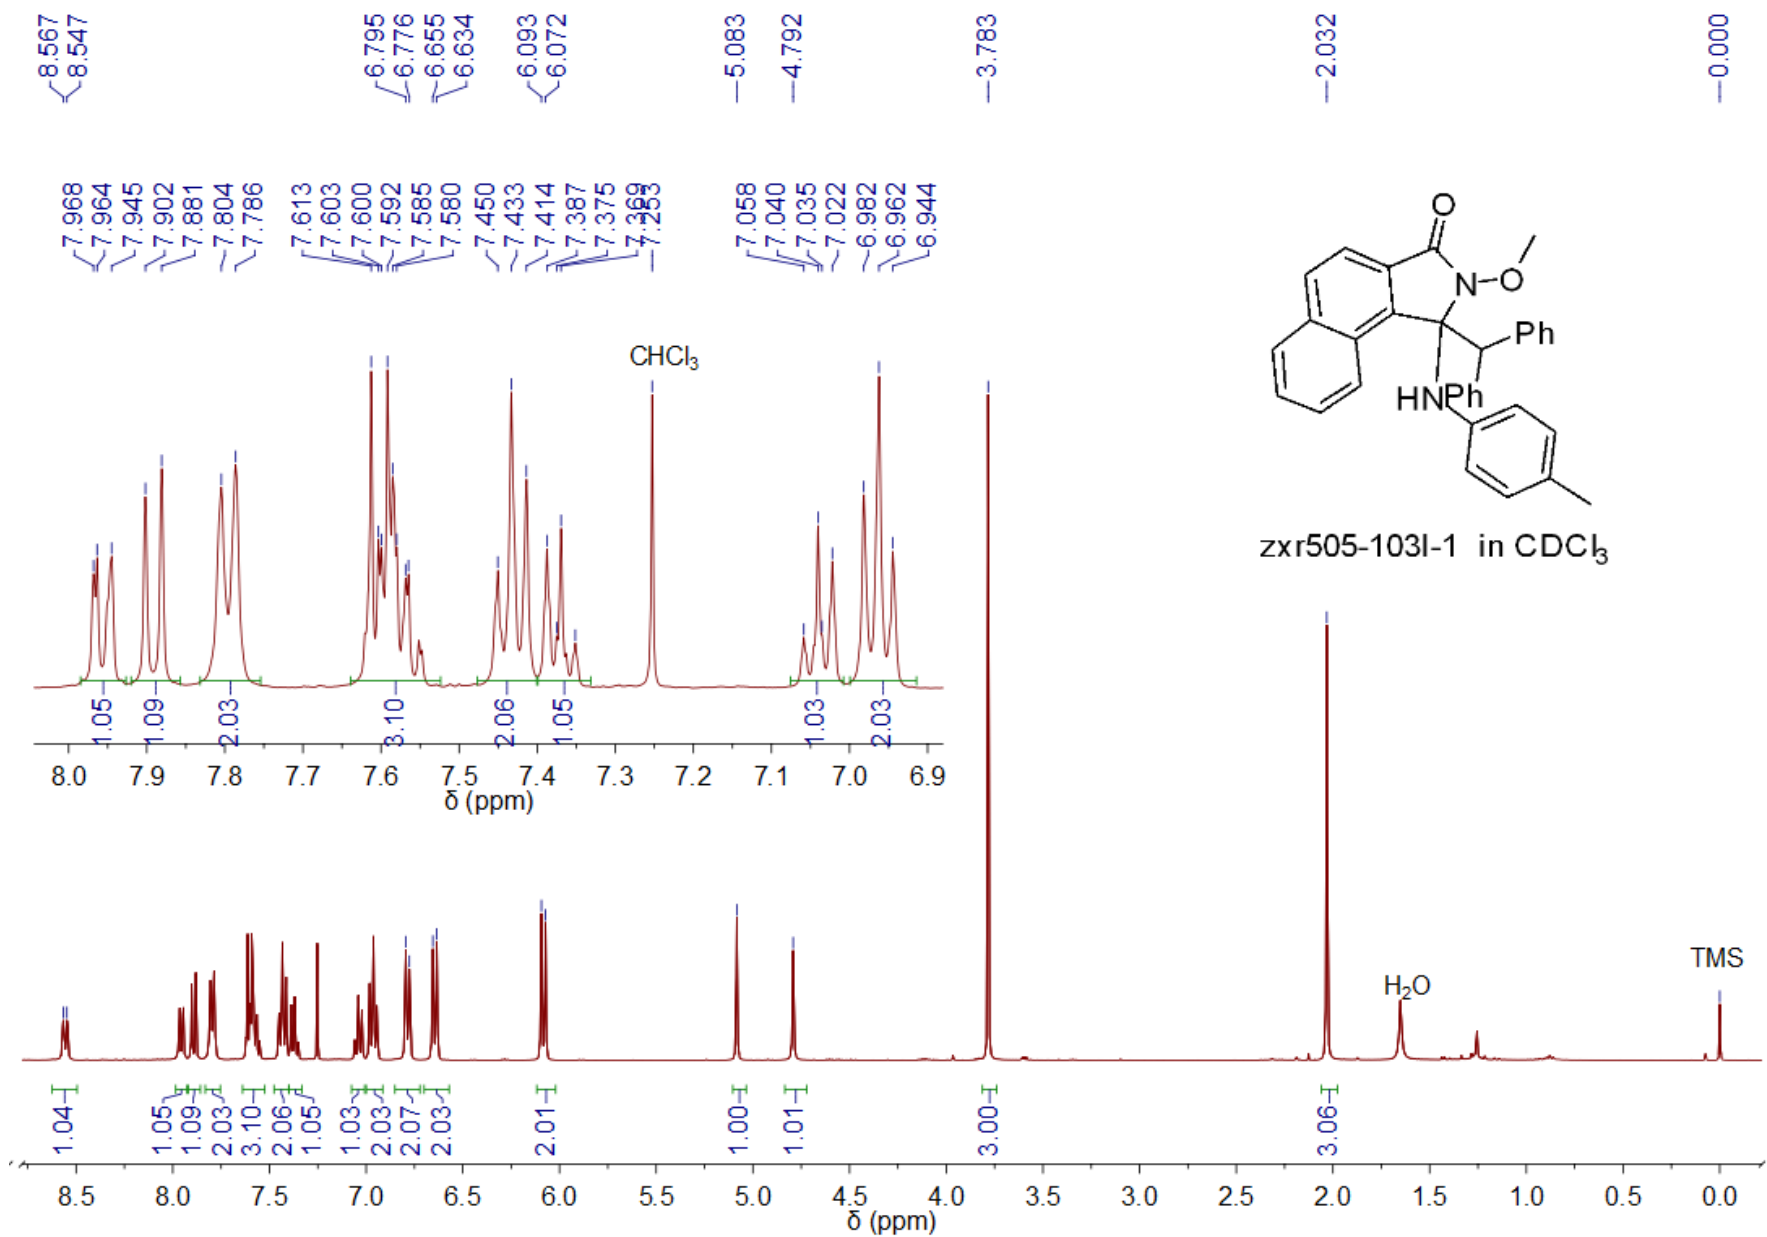

**3pb** -  $^1\text{H}$  NMR

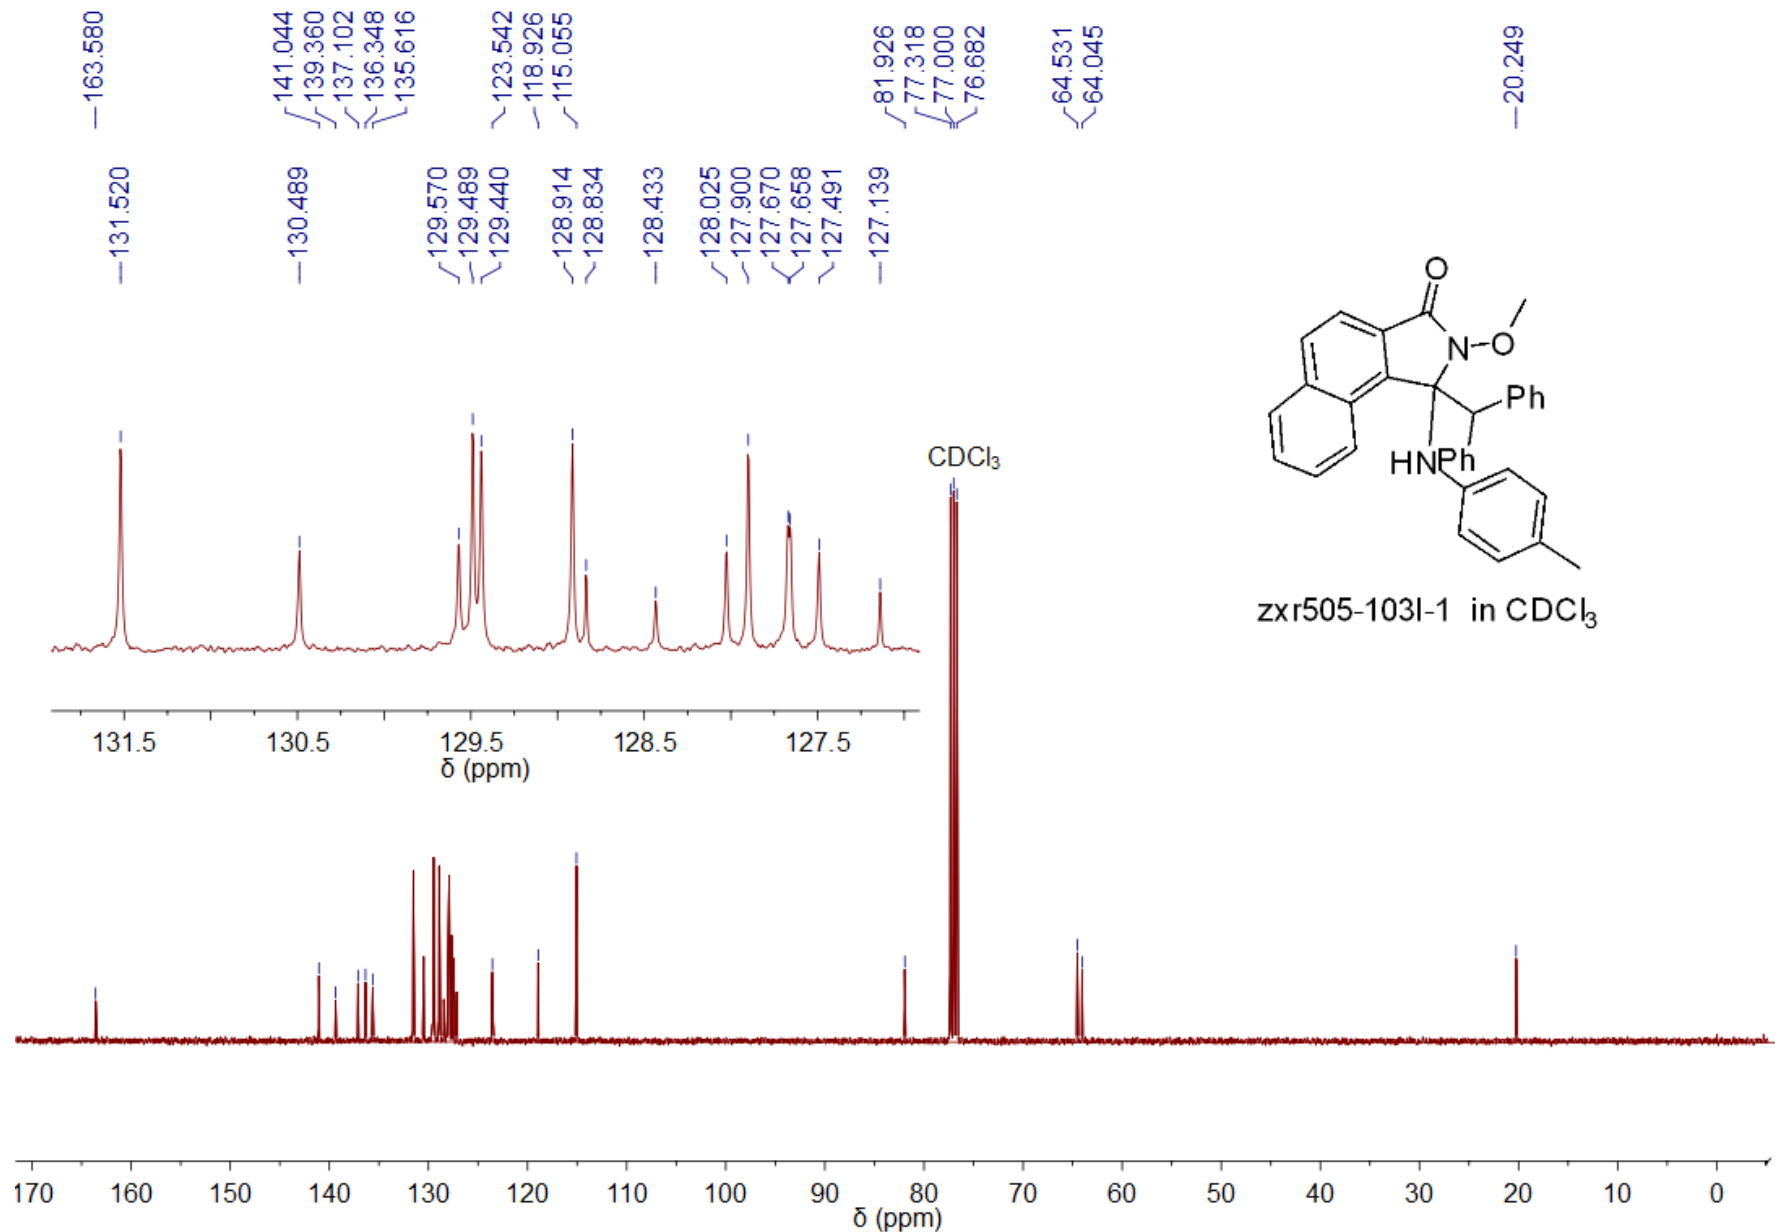

3pb – <sup>13</sup>C NMR

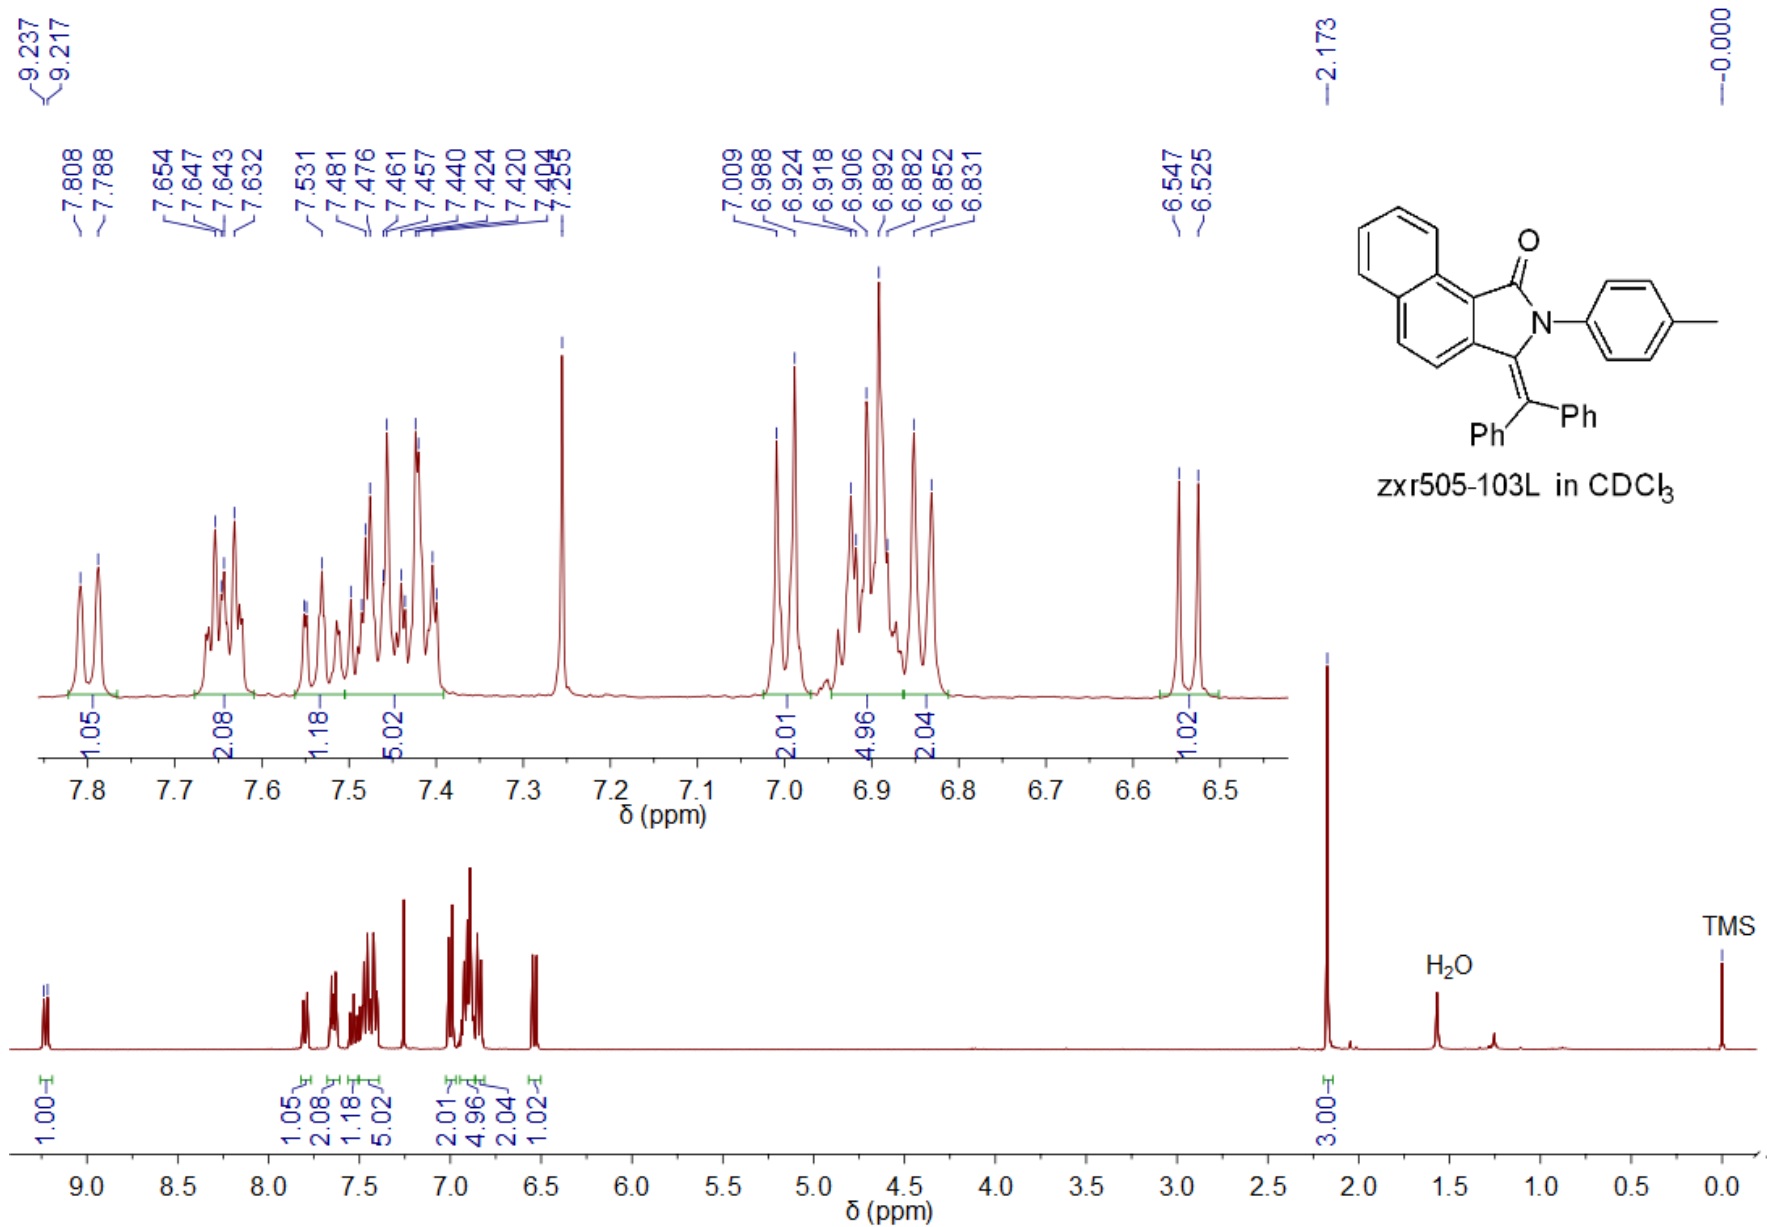

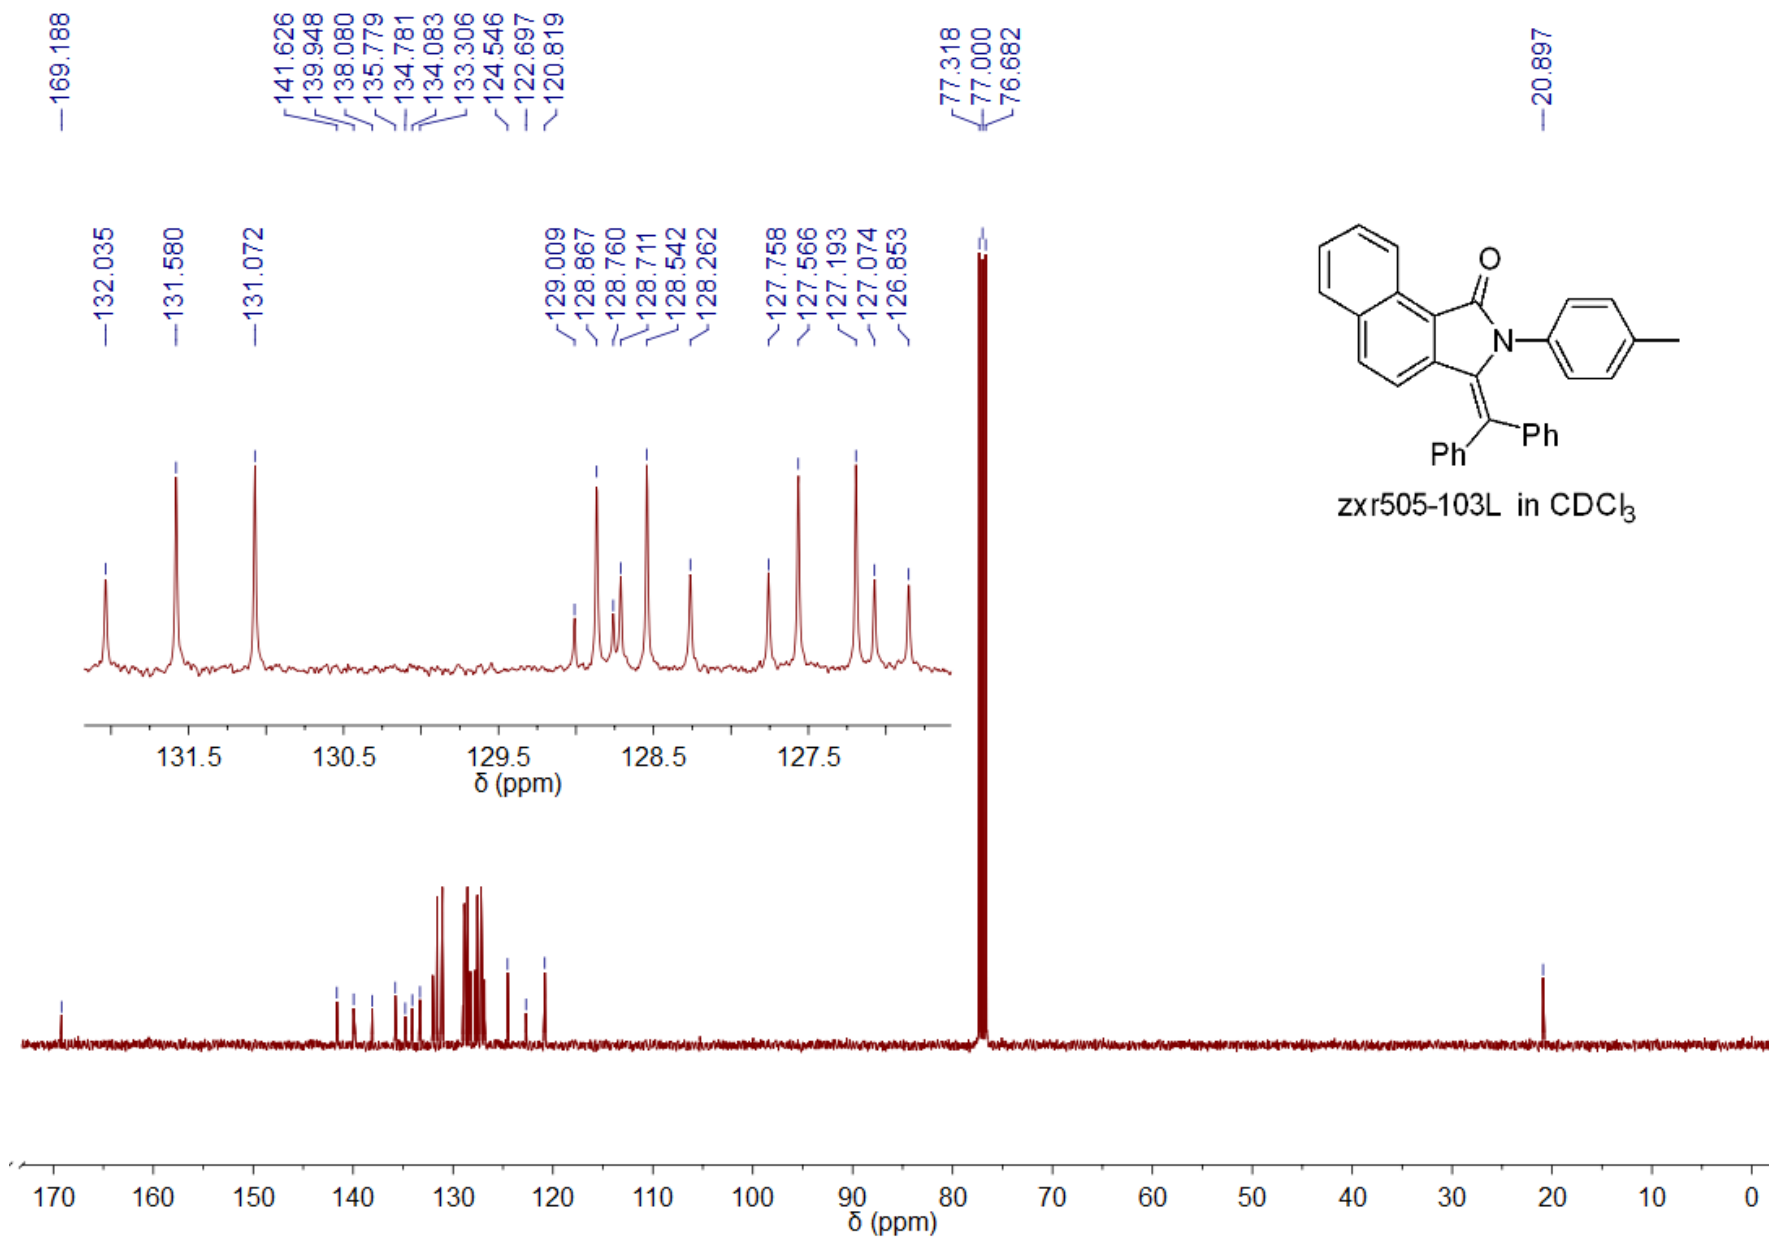

**4a** –  $^{13}\text{C}$  NMR



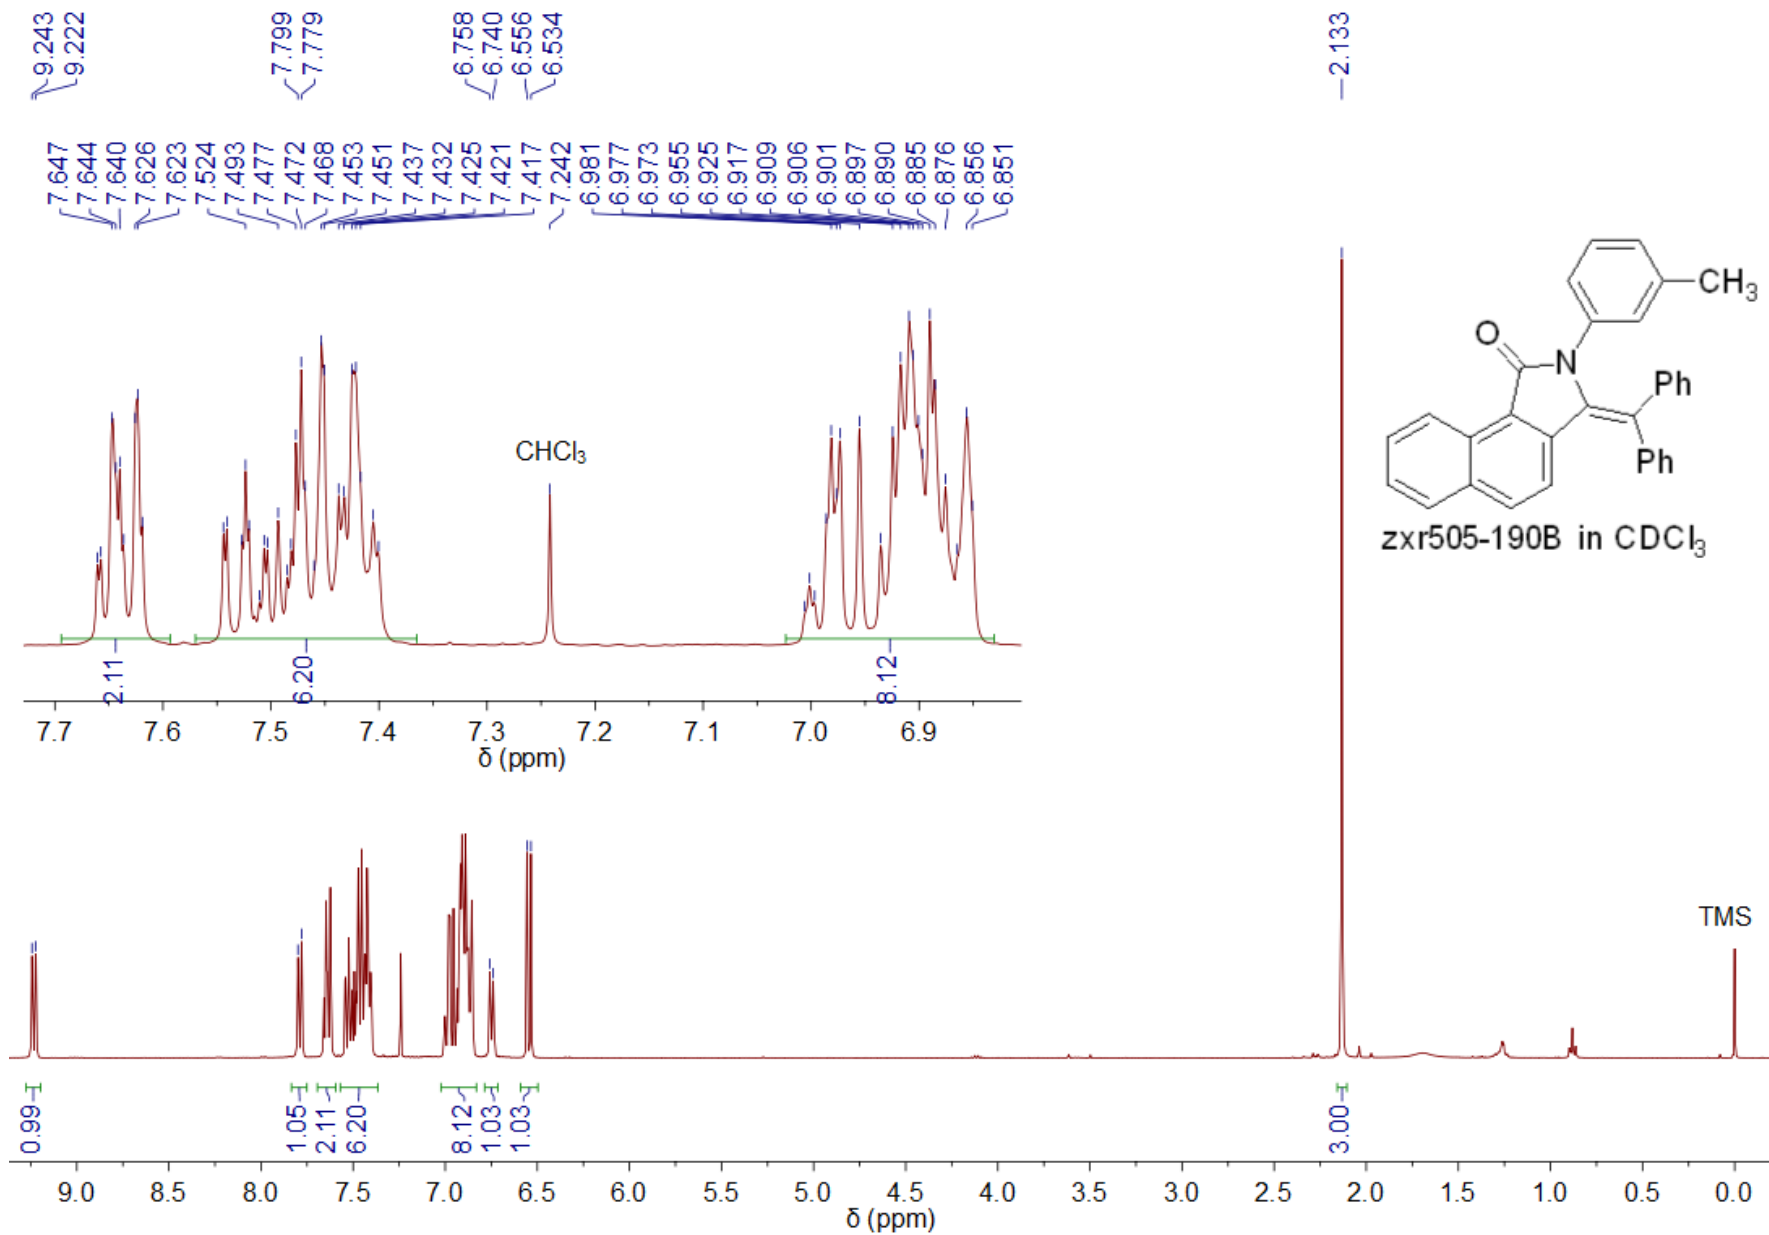

**4b** - <sup>1</sup>H NMR

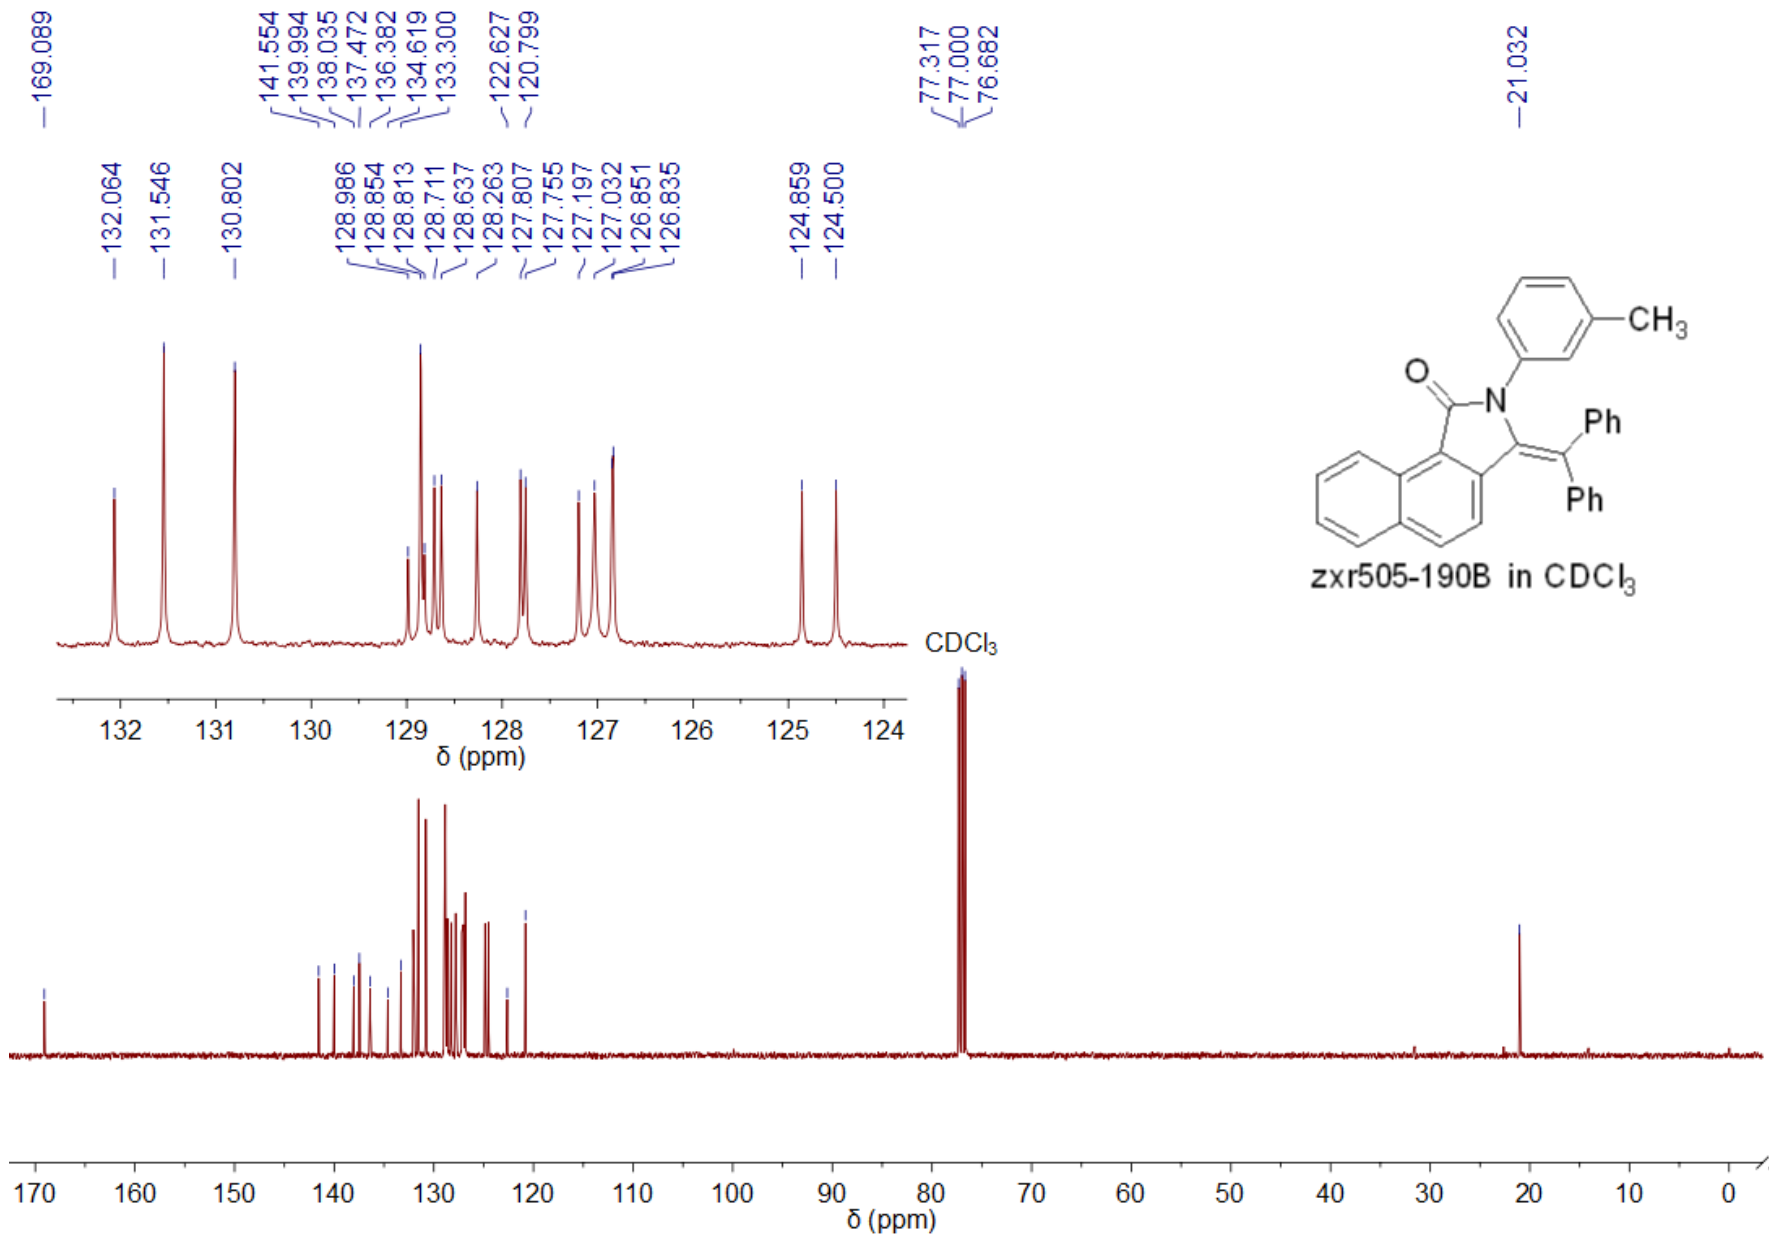

**4b** –  $^{13}\text{C}$  NMR

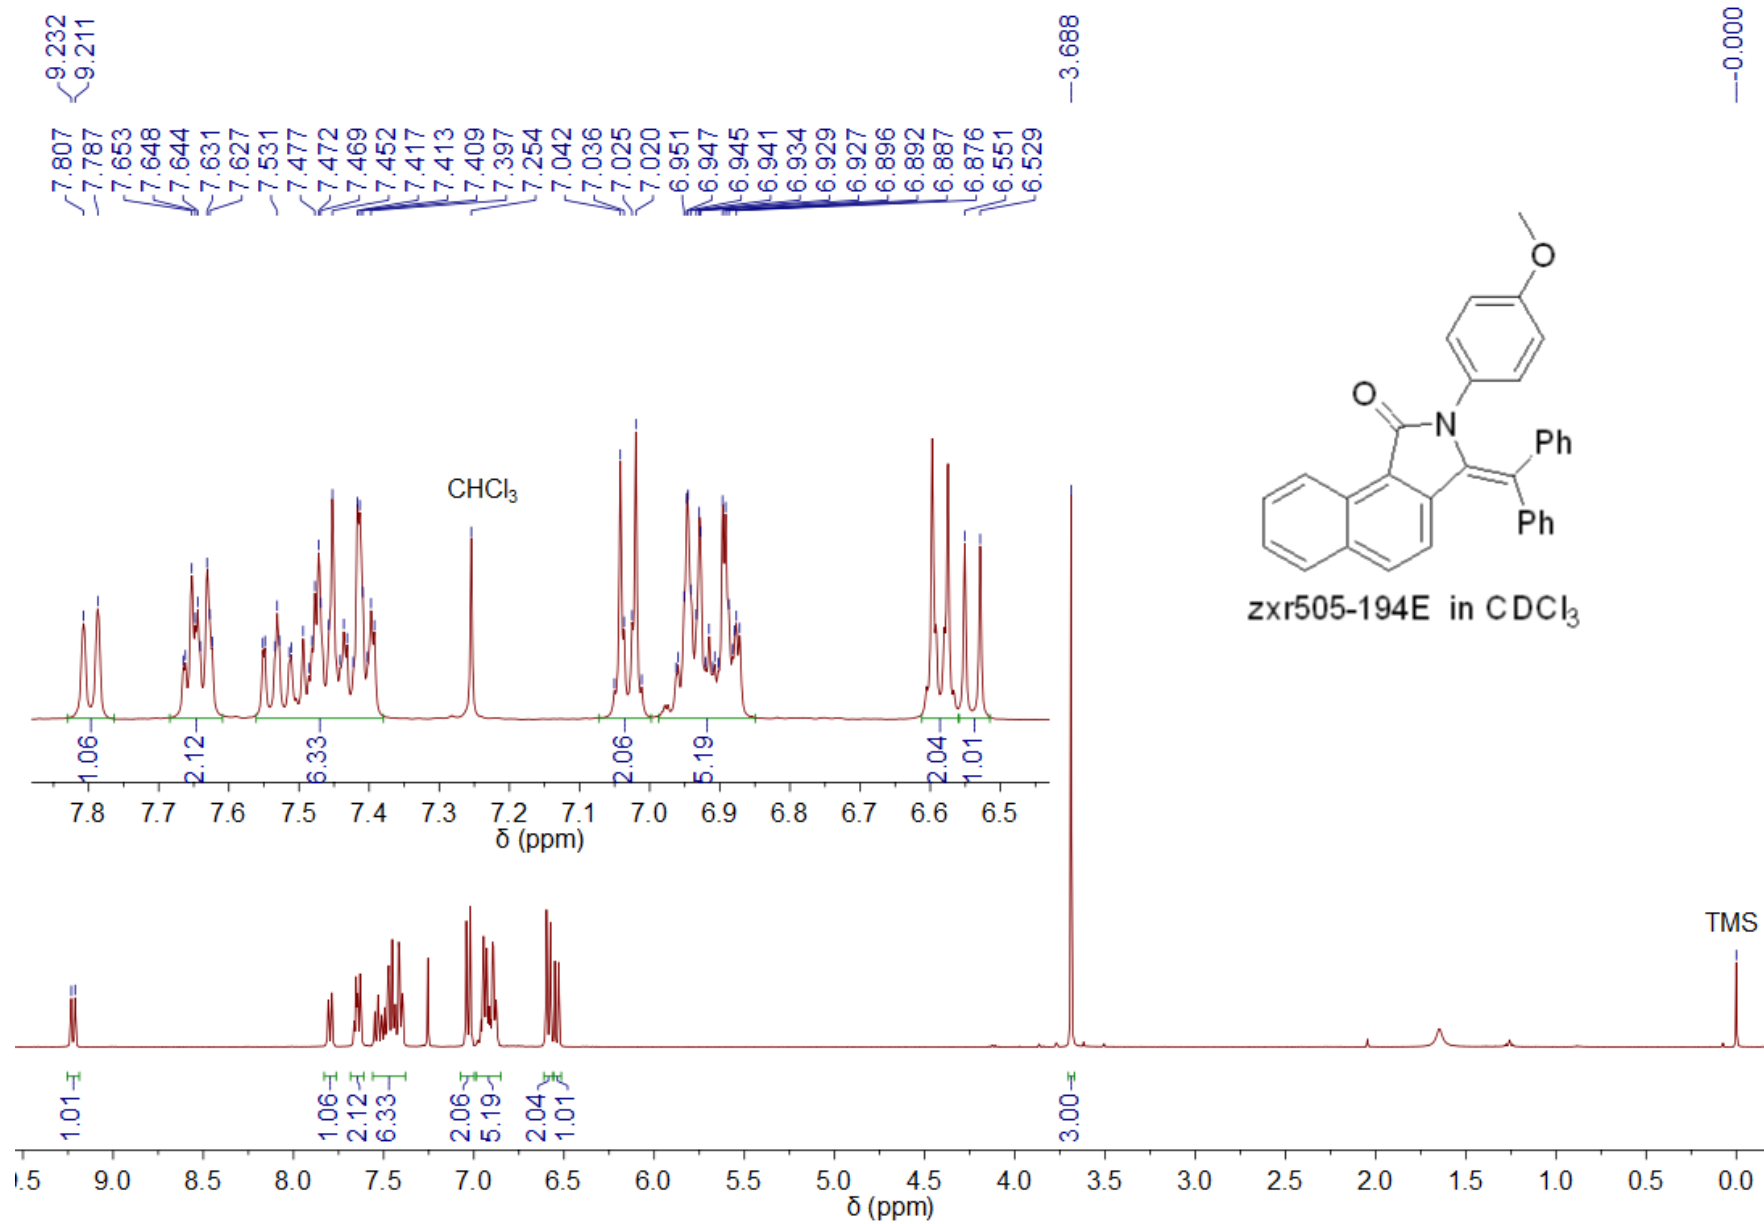

4c - <sup>1</sup>H NMR

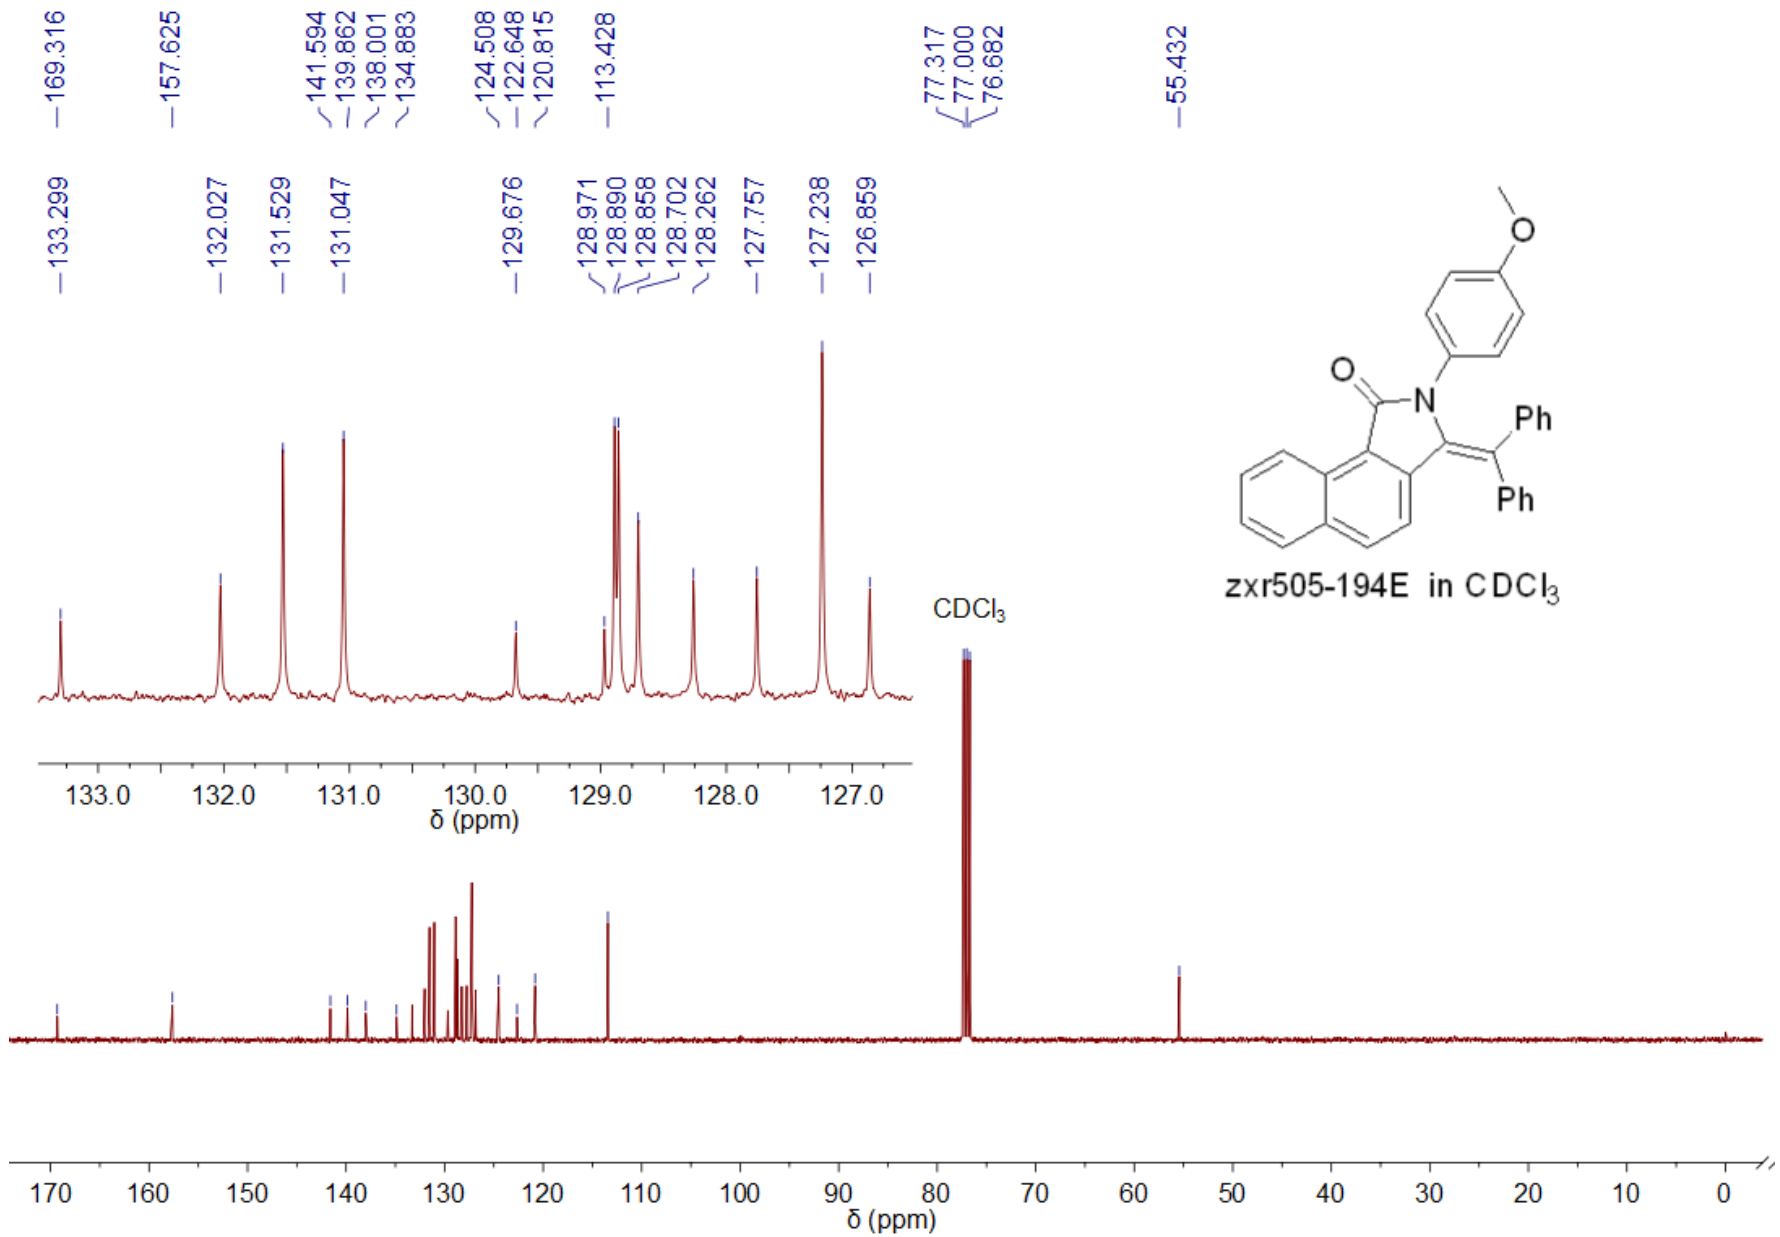

**4c** – <sup>13</sup>C NMR

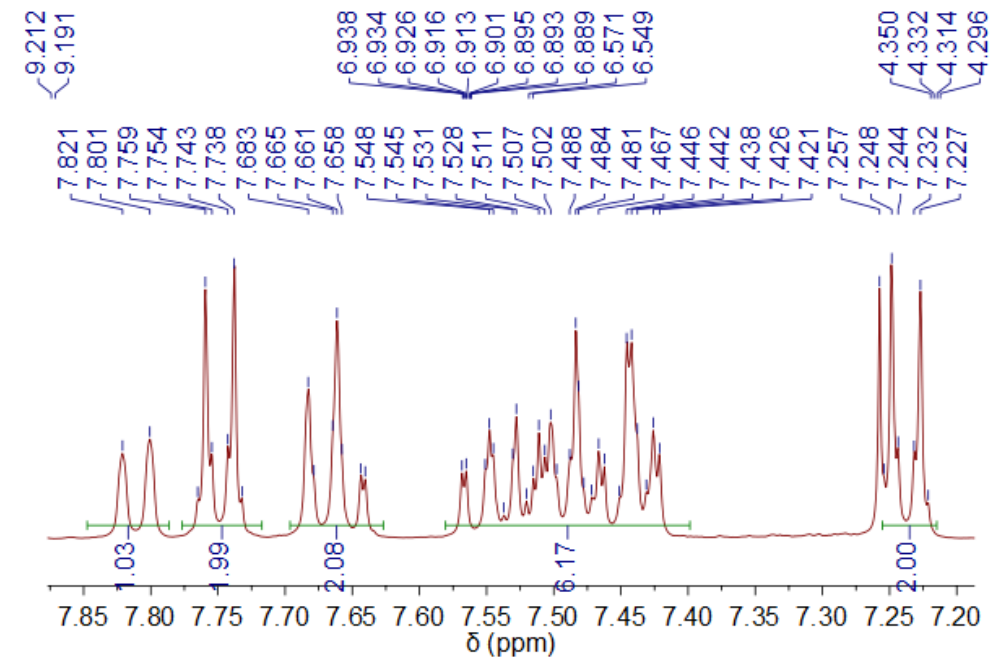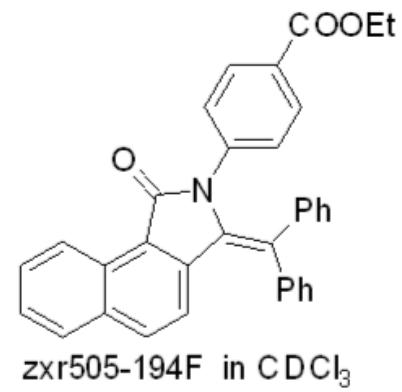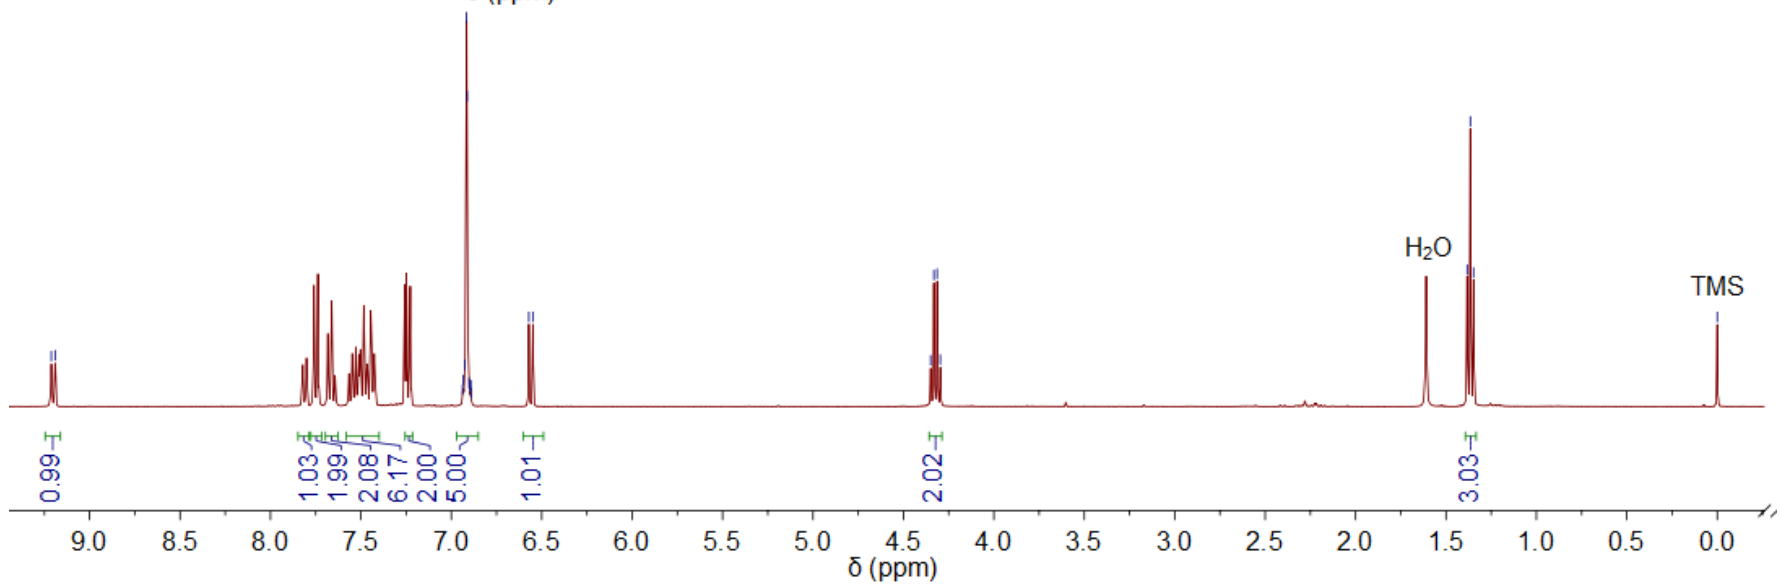

**4d** - <sup>1</sup>H NMR

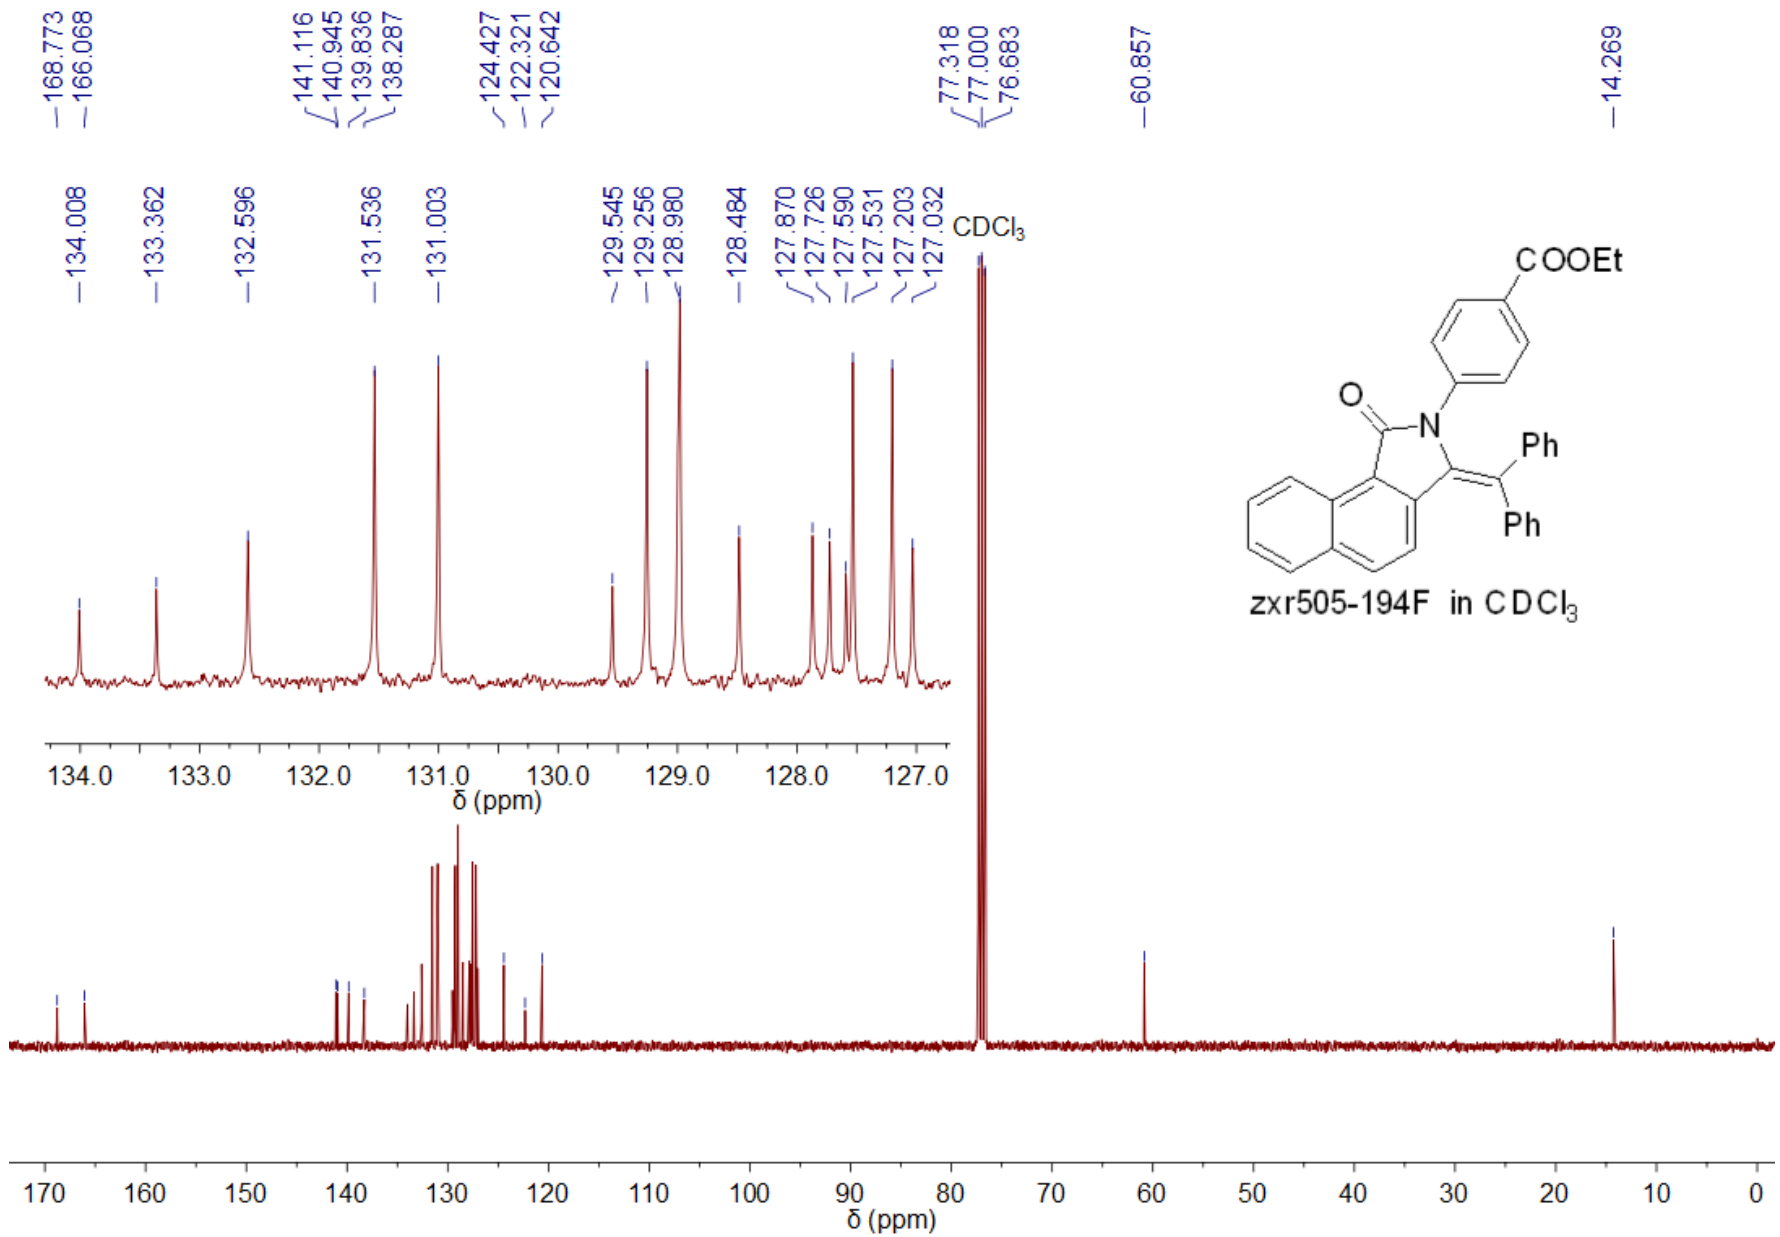

**4d** – <sup>13</sup>C NMR

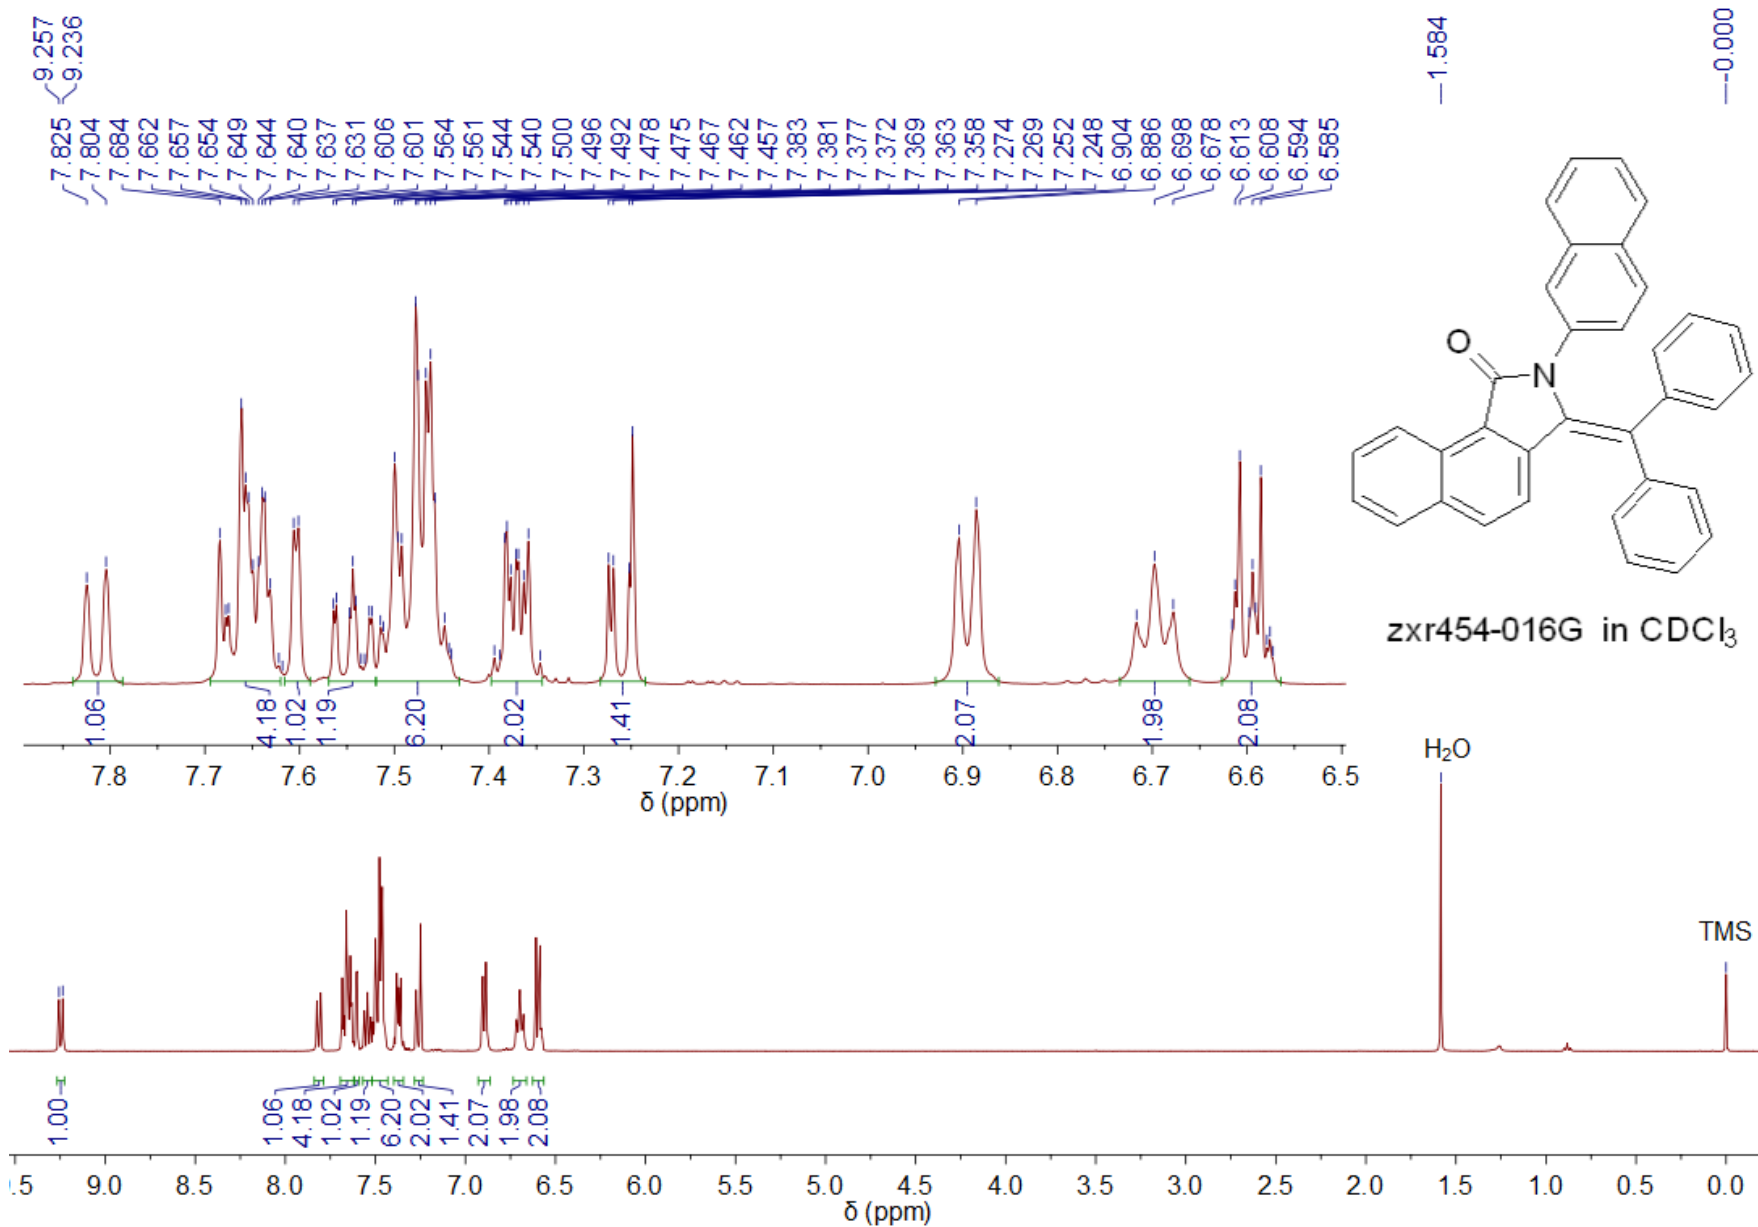

**4e** -  $^1\text{H}$  NMR

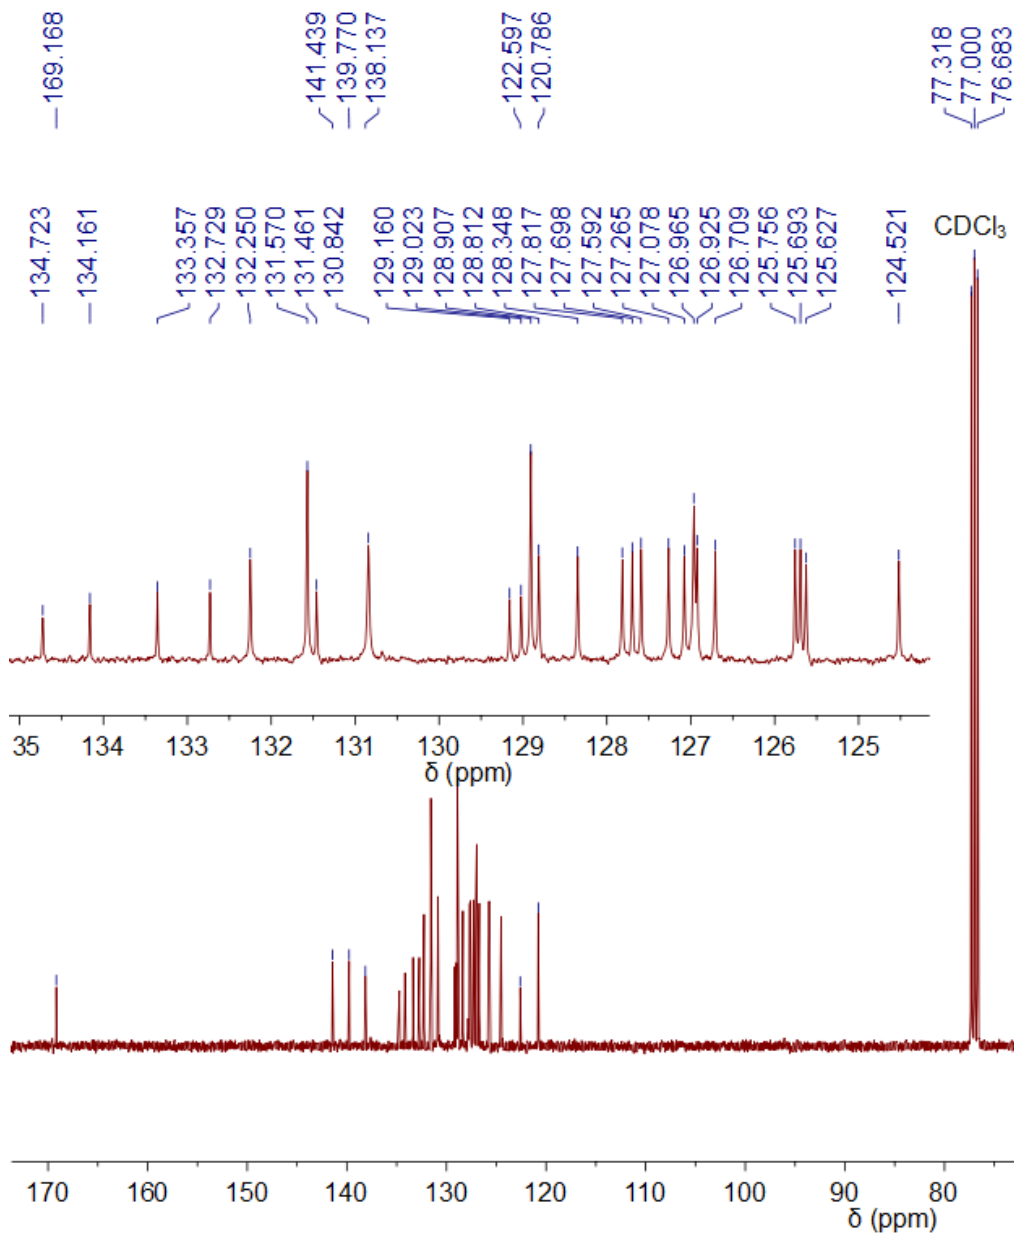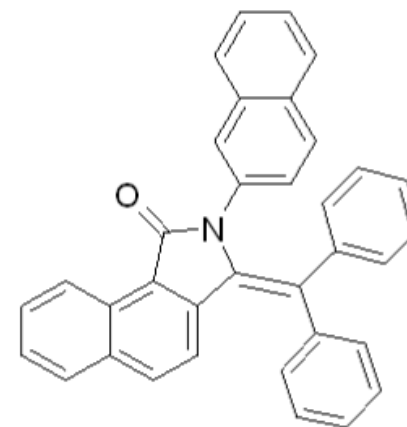

zxr454-016G in CDCl<sub>3</sub>

4e - <sup>13</sup>C NMR



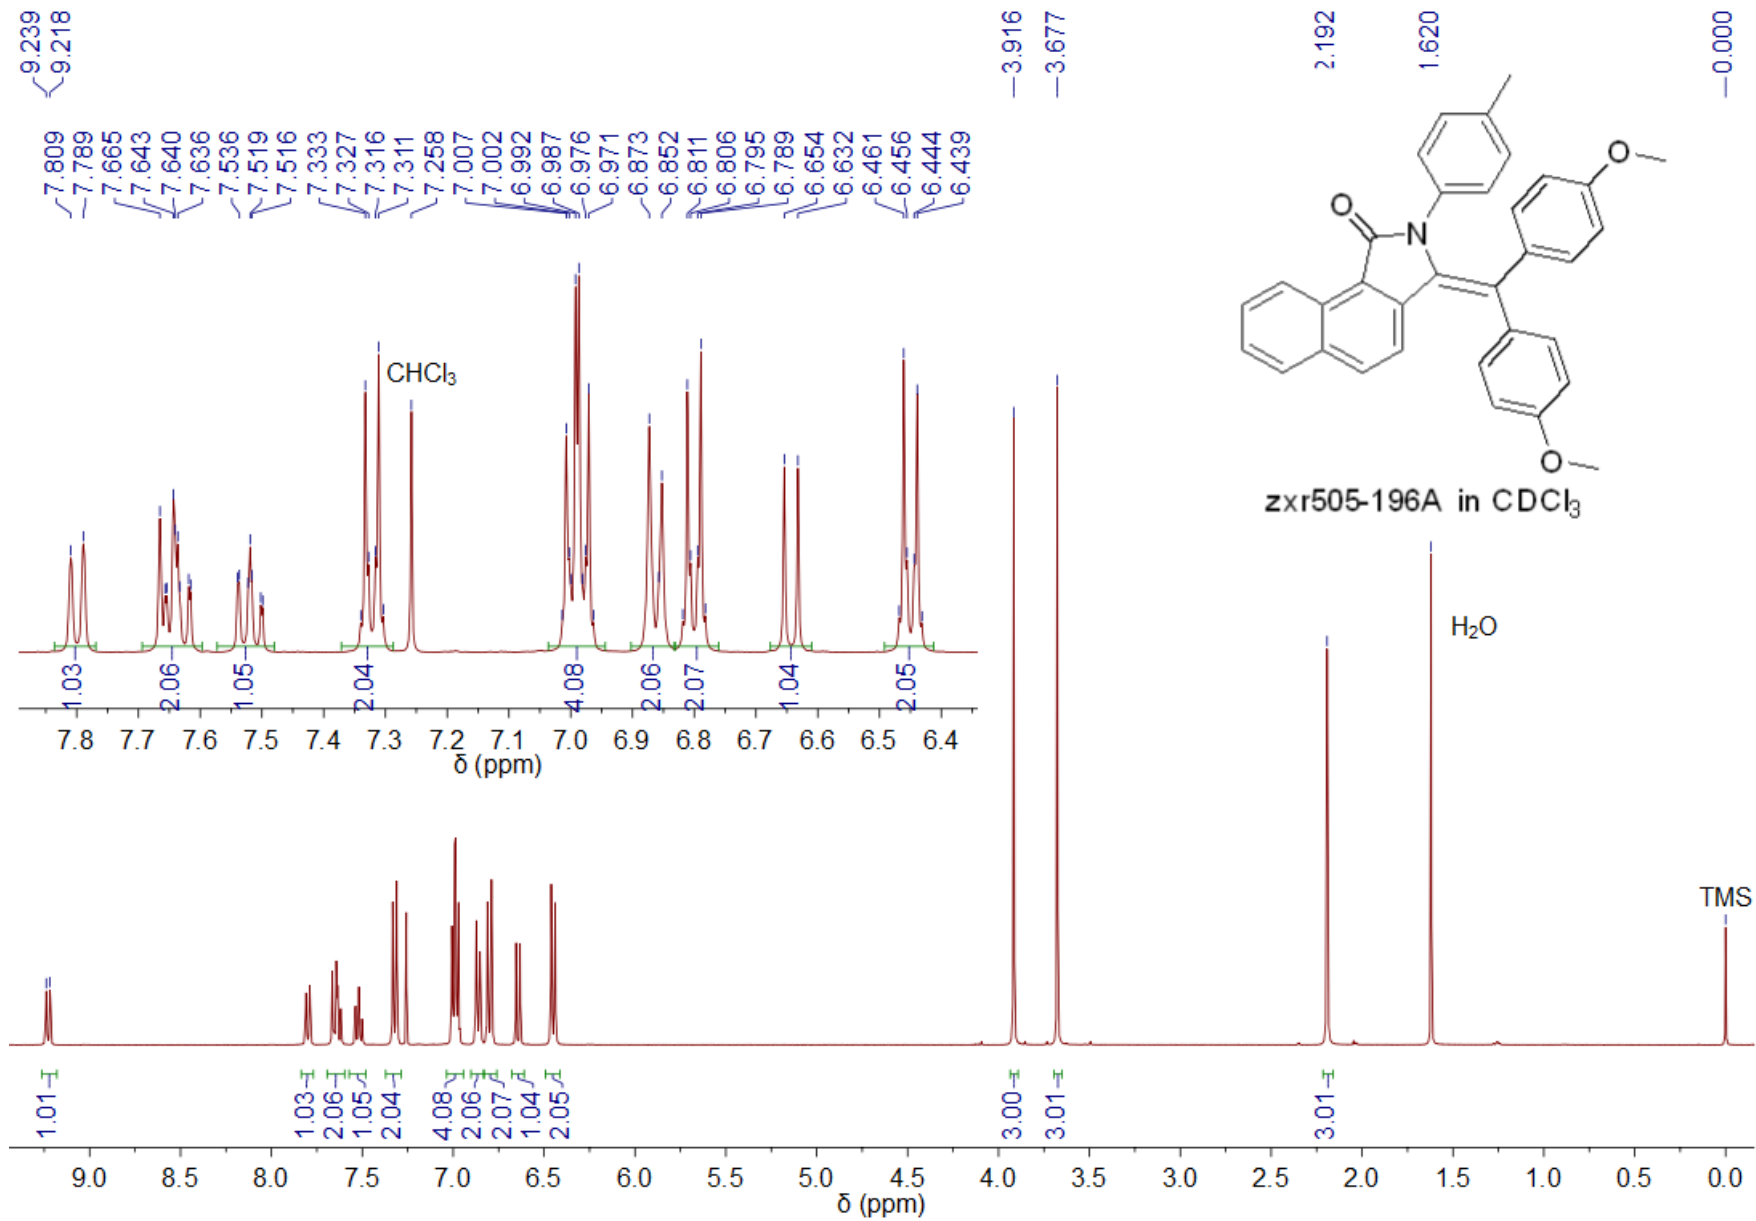

**4f** -  $^1\text{H}$  NMR

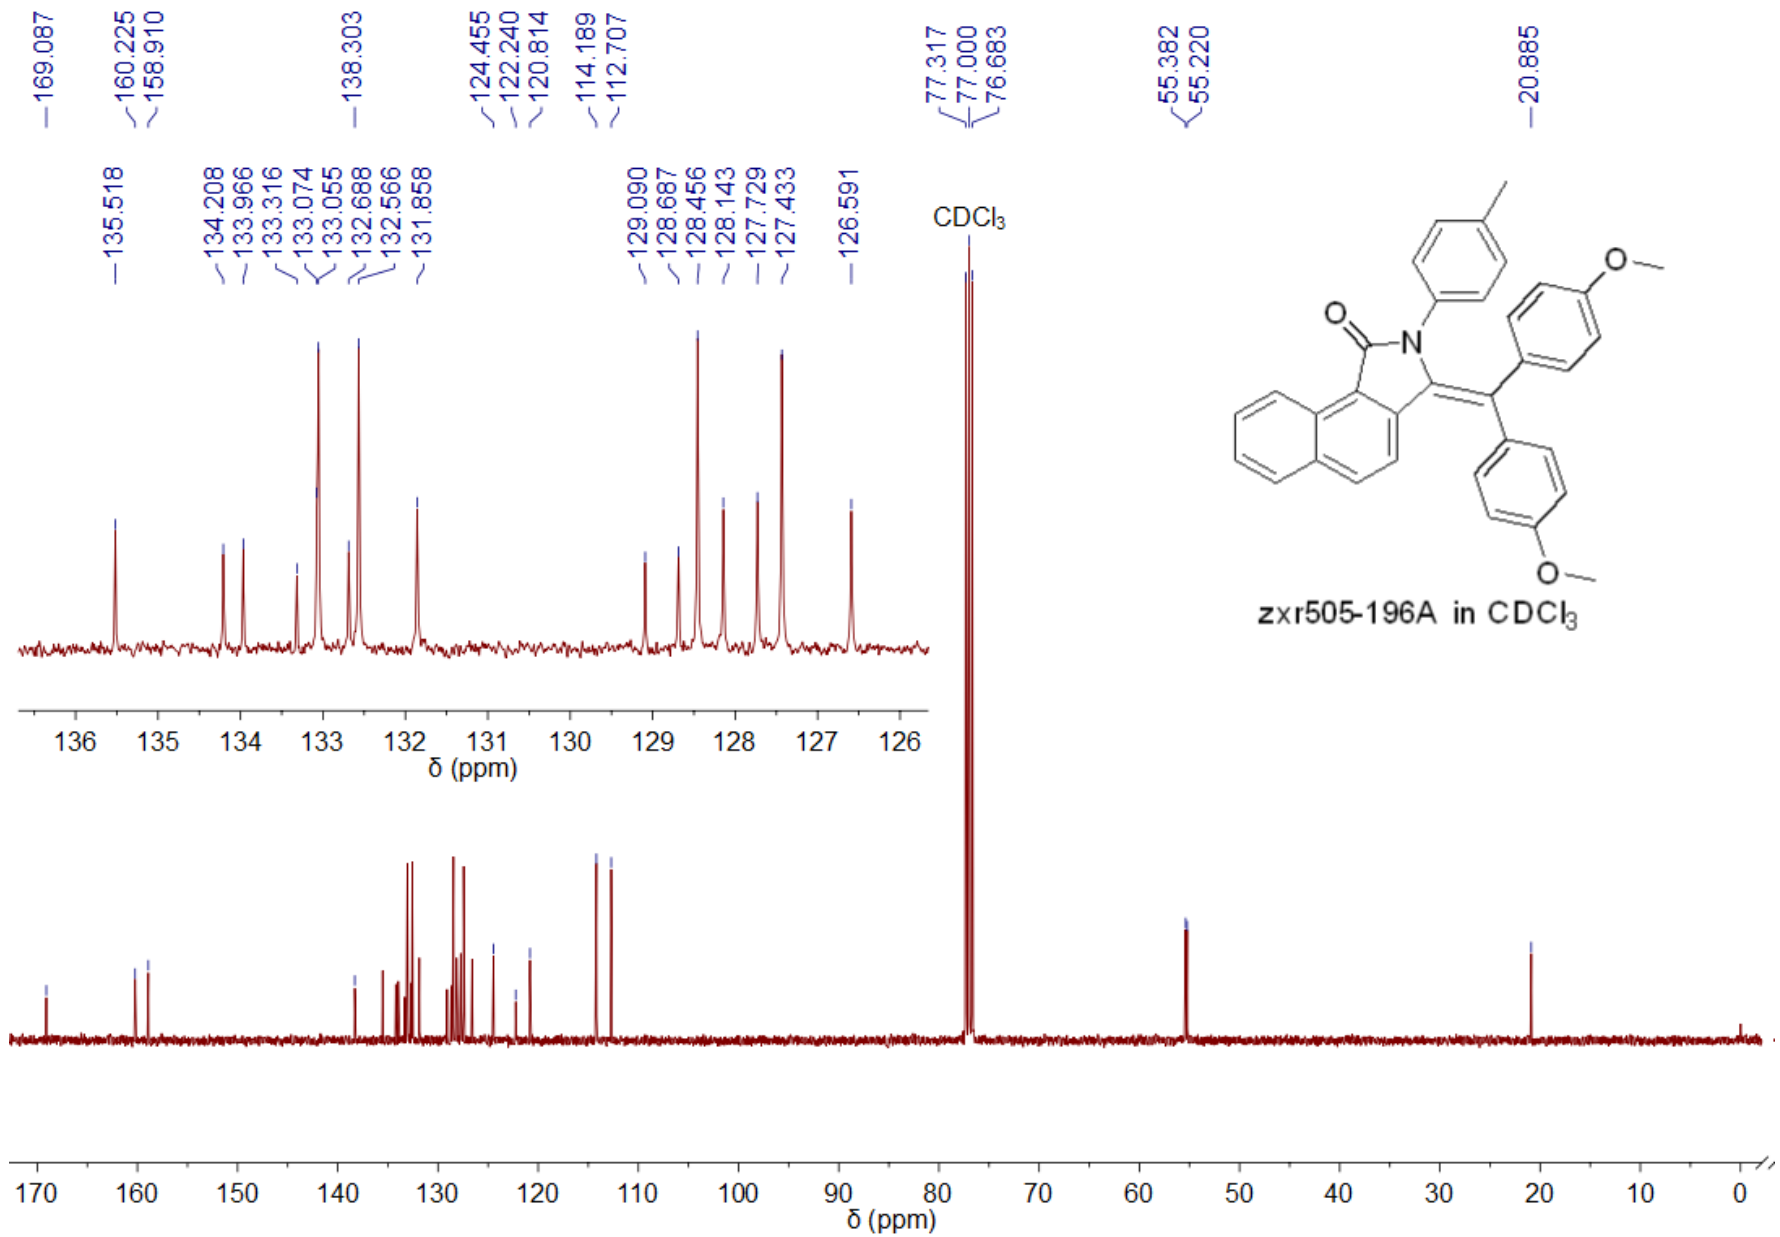

**4f** –  $^{13}\text{C}$  NMR

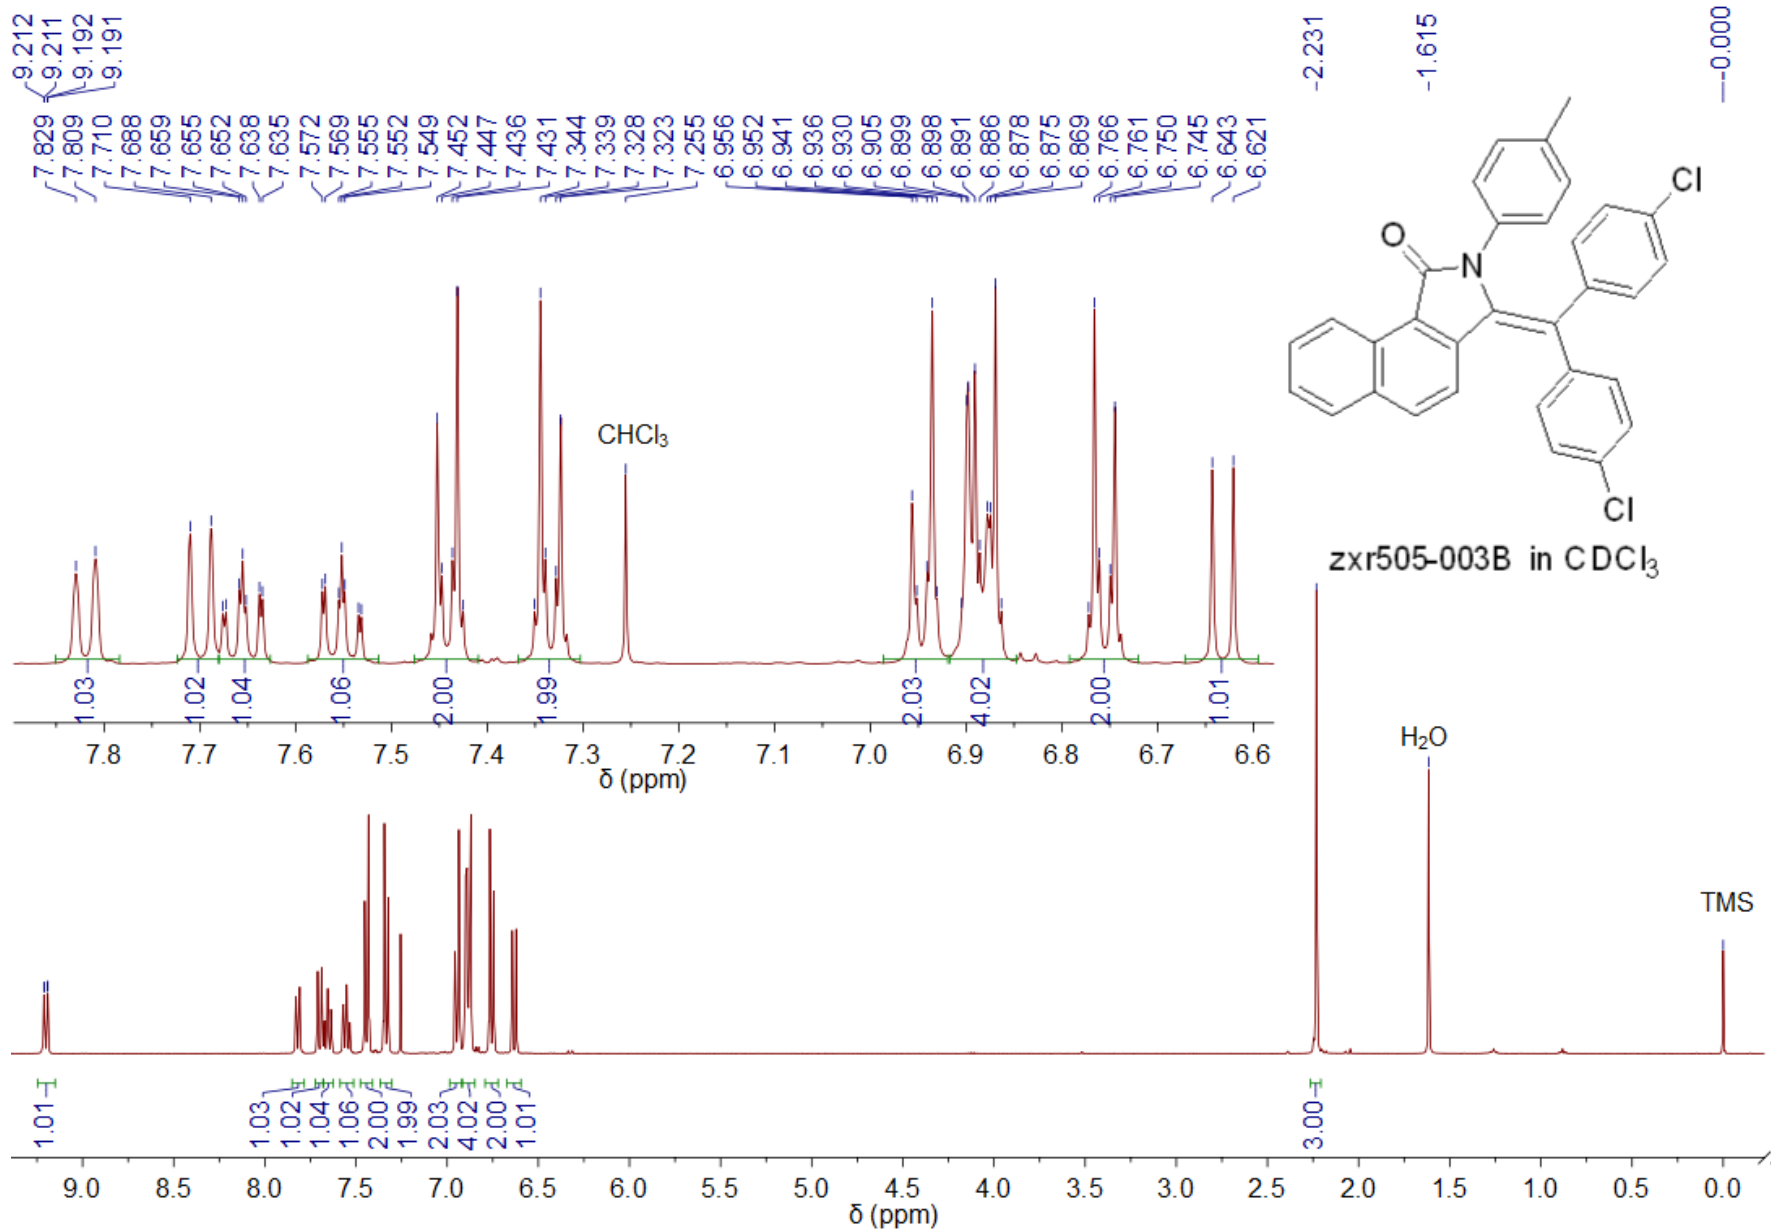

**4g** - <sup>1</sup>H NMR

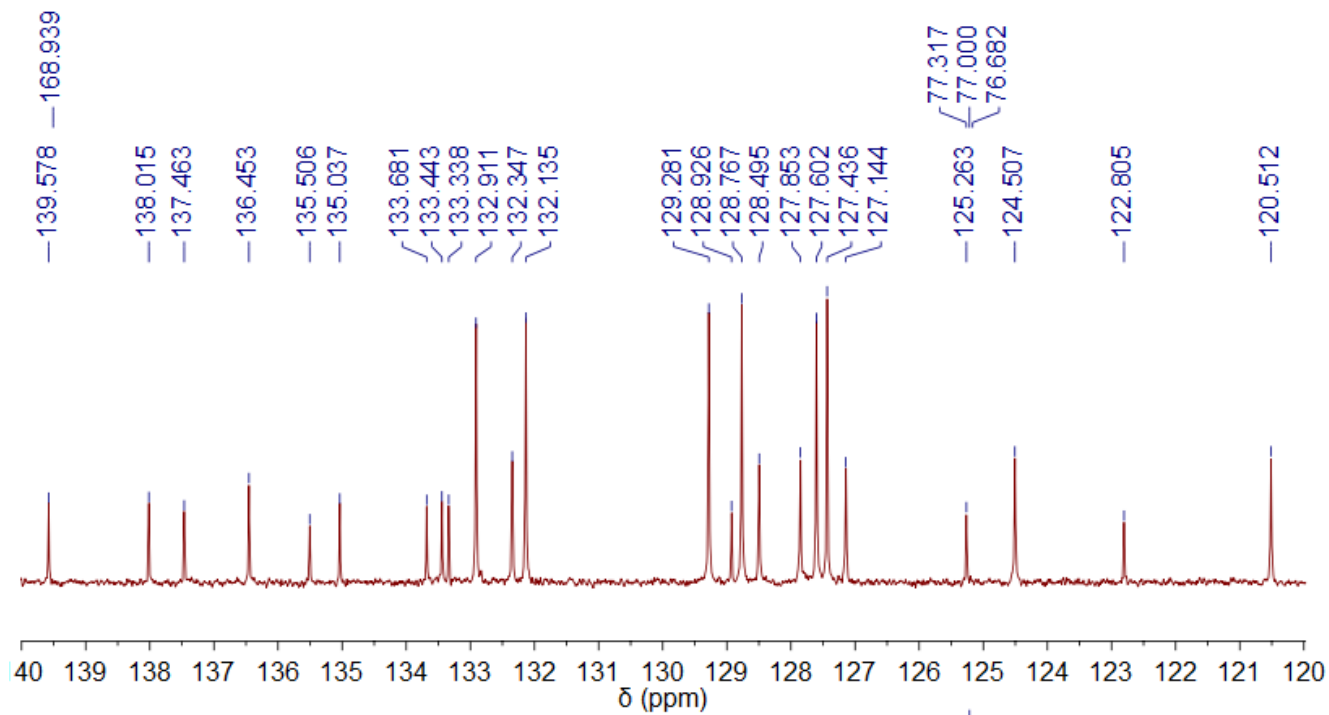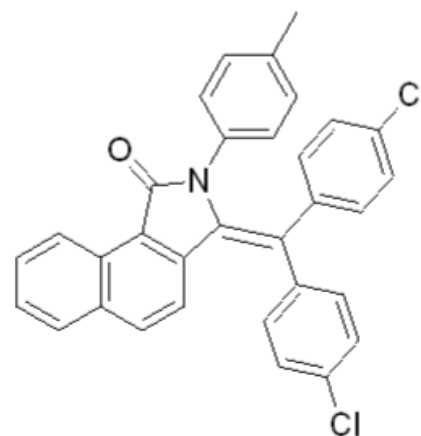

**zxr505-003B** in  $\text{CDCl}_3$

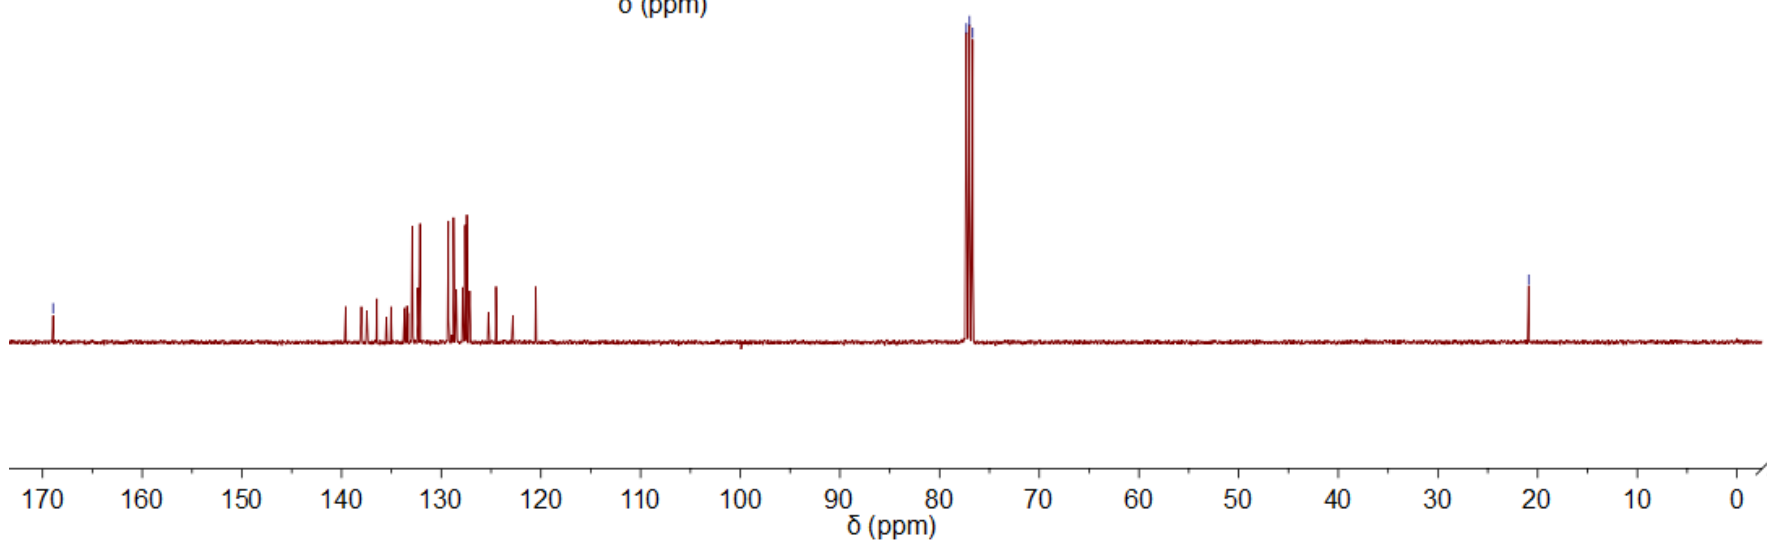

**4g** -  $^{13}\text{C}$  NMR

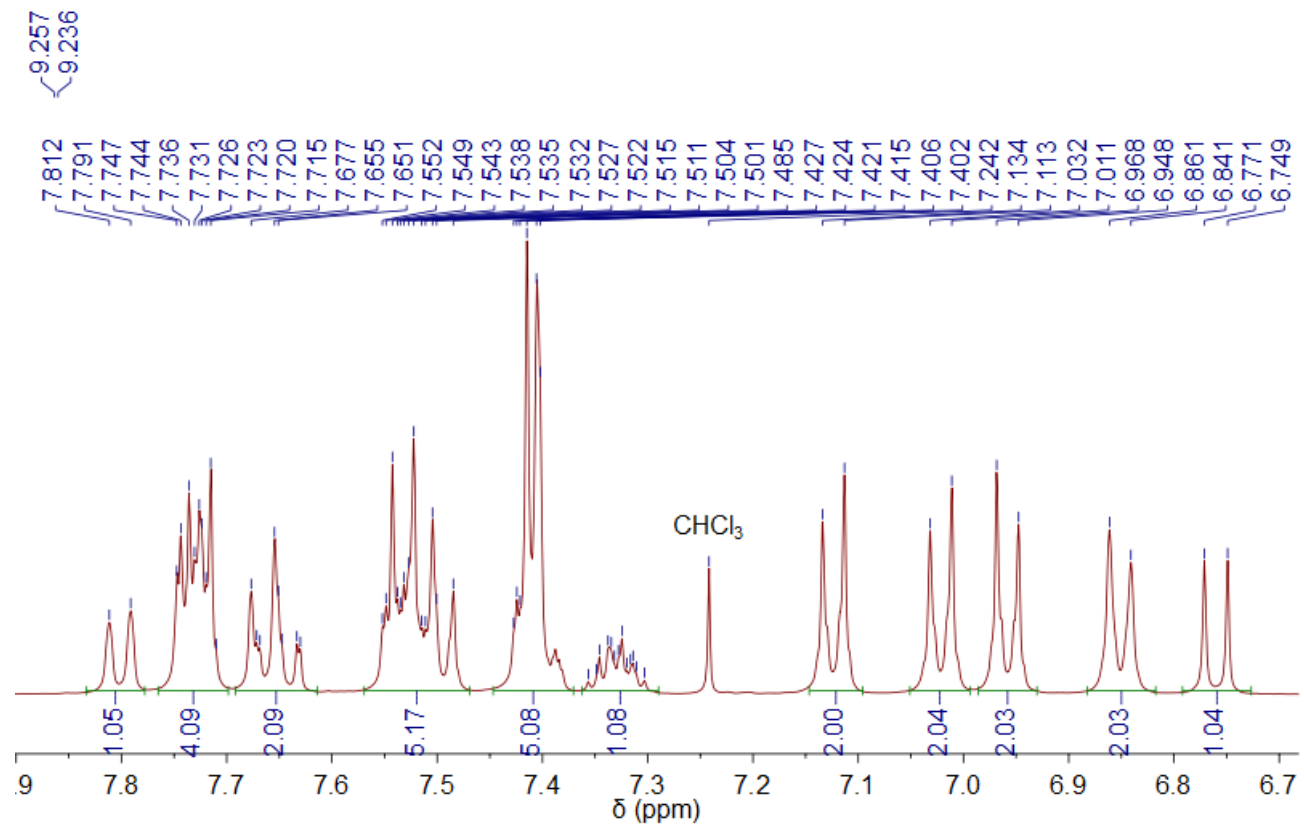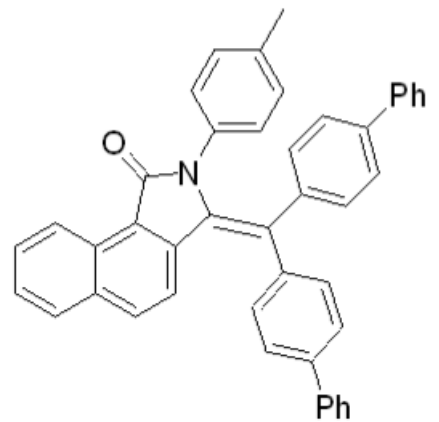

zxr454-013 in CDCl<sub>3</sub>

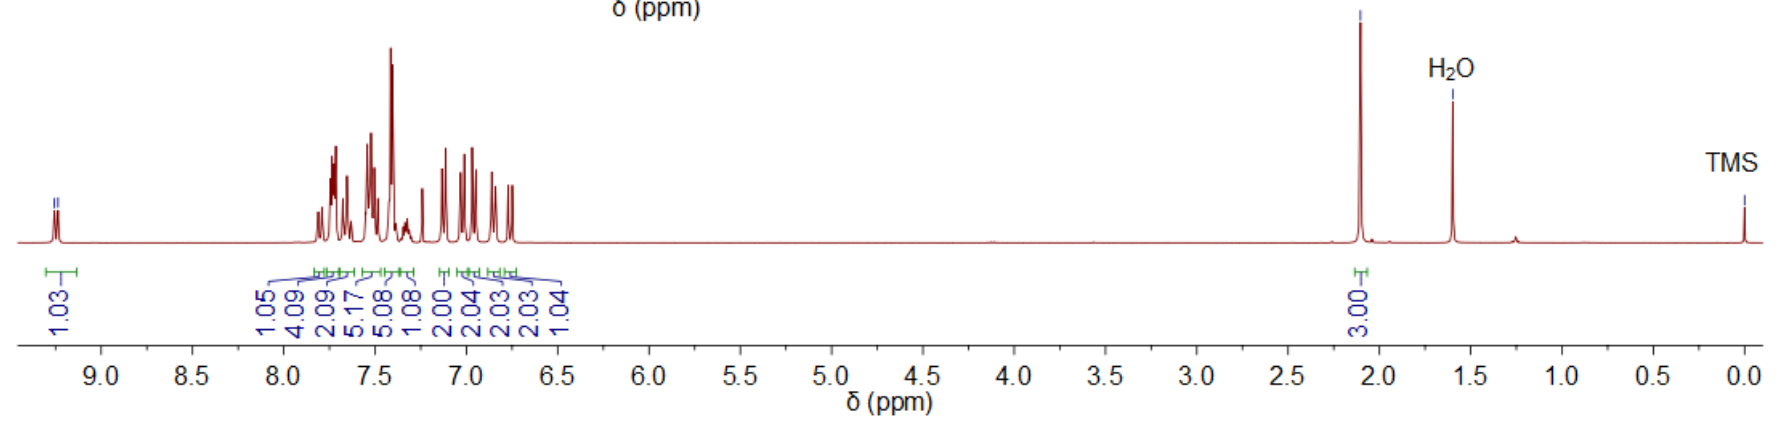

4h - <sup>1</sup>H NMR

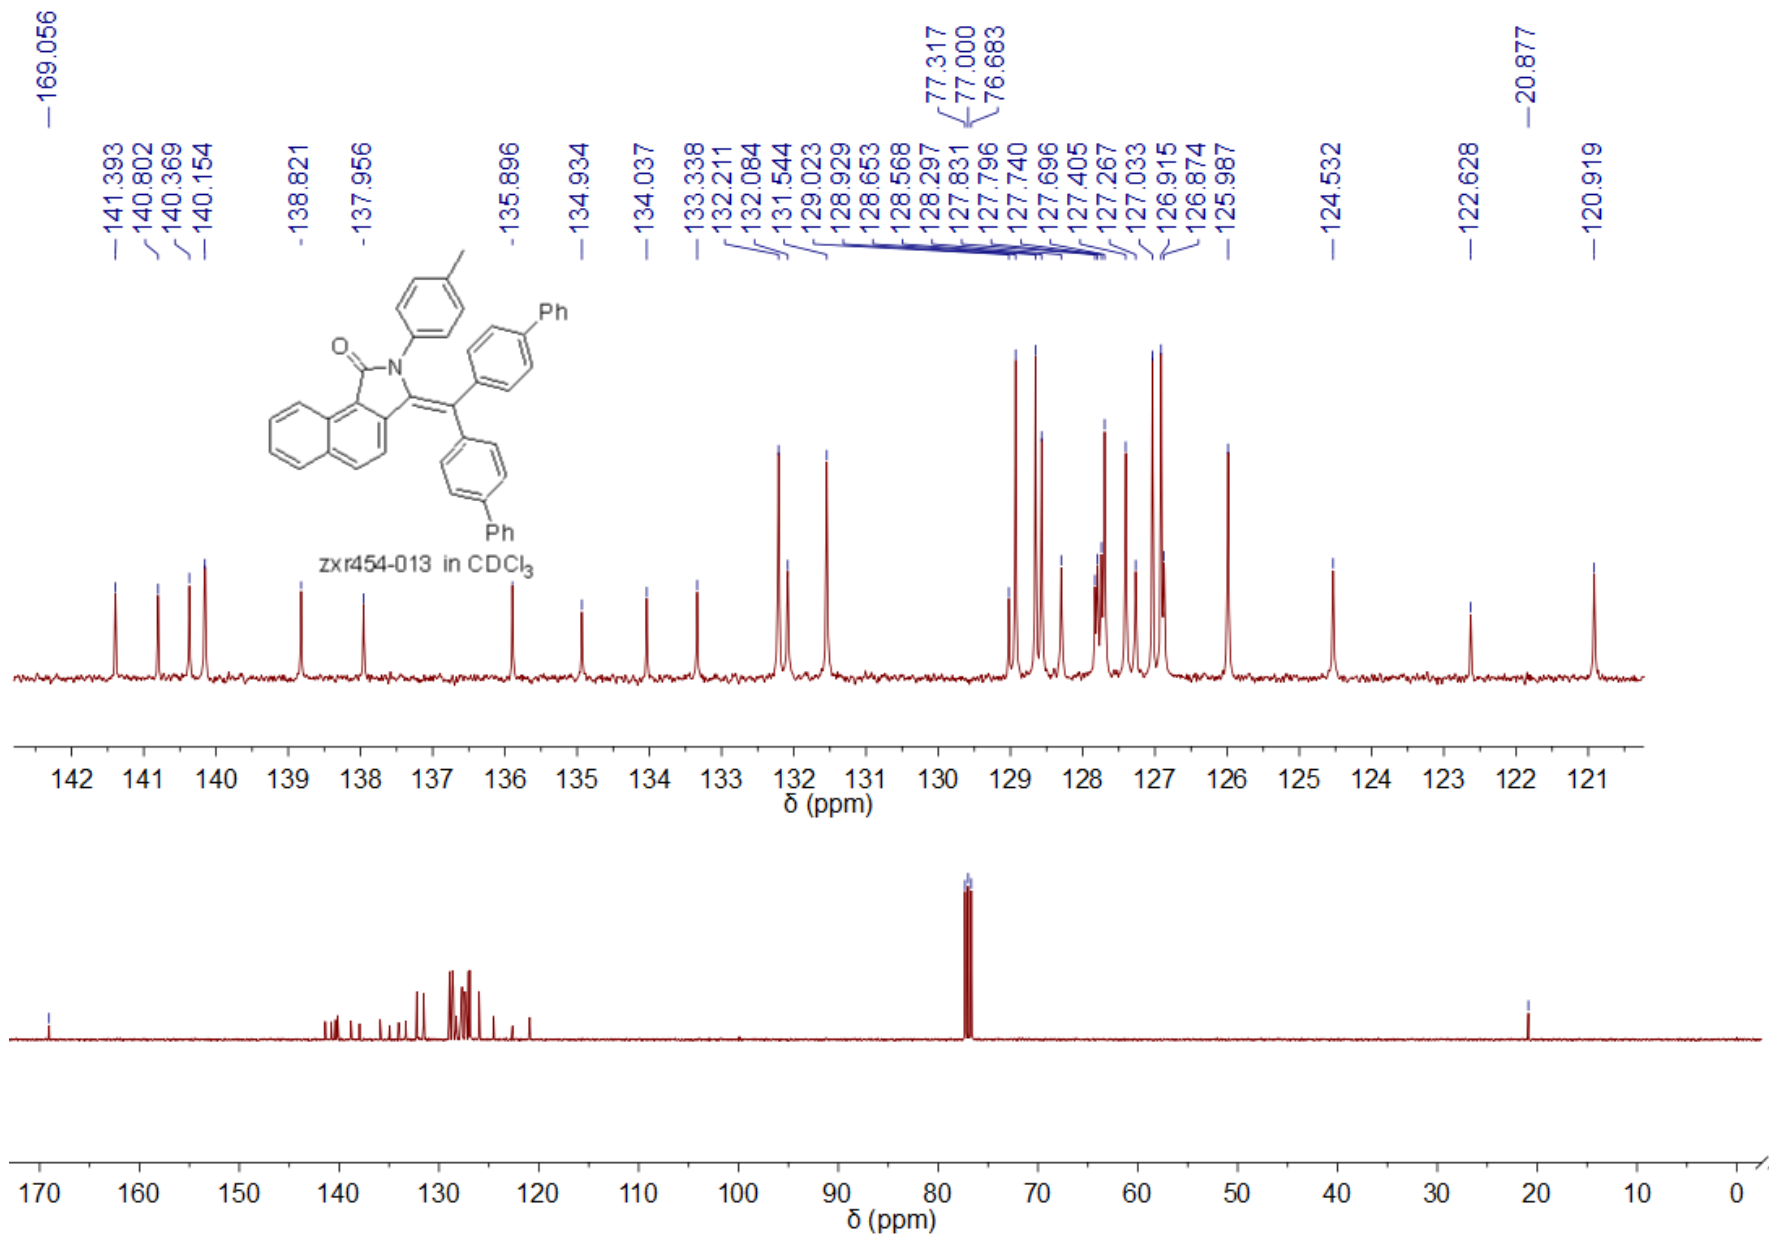

**4h – <sup>13</sup>C NMR**

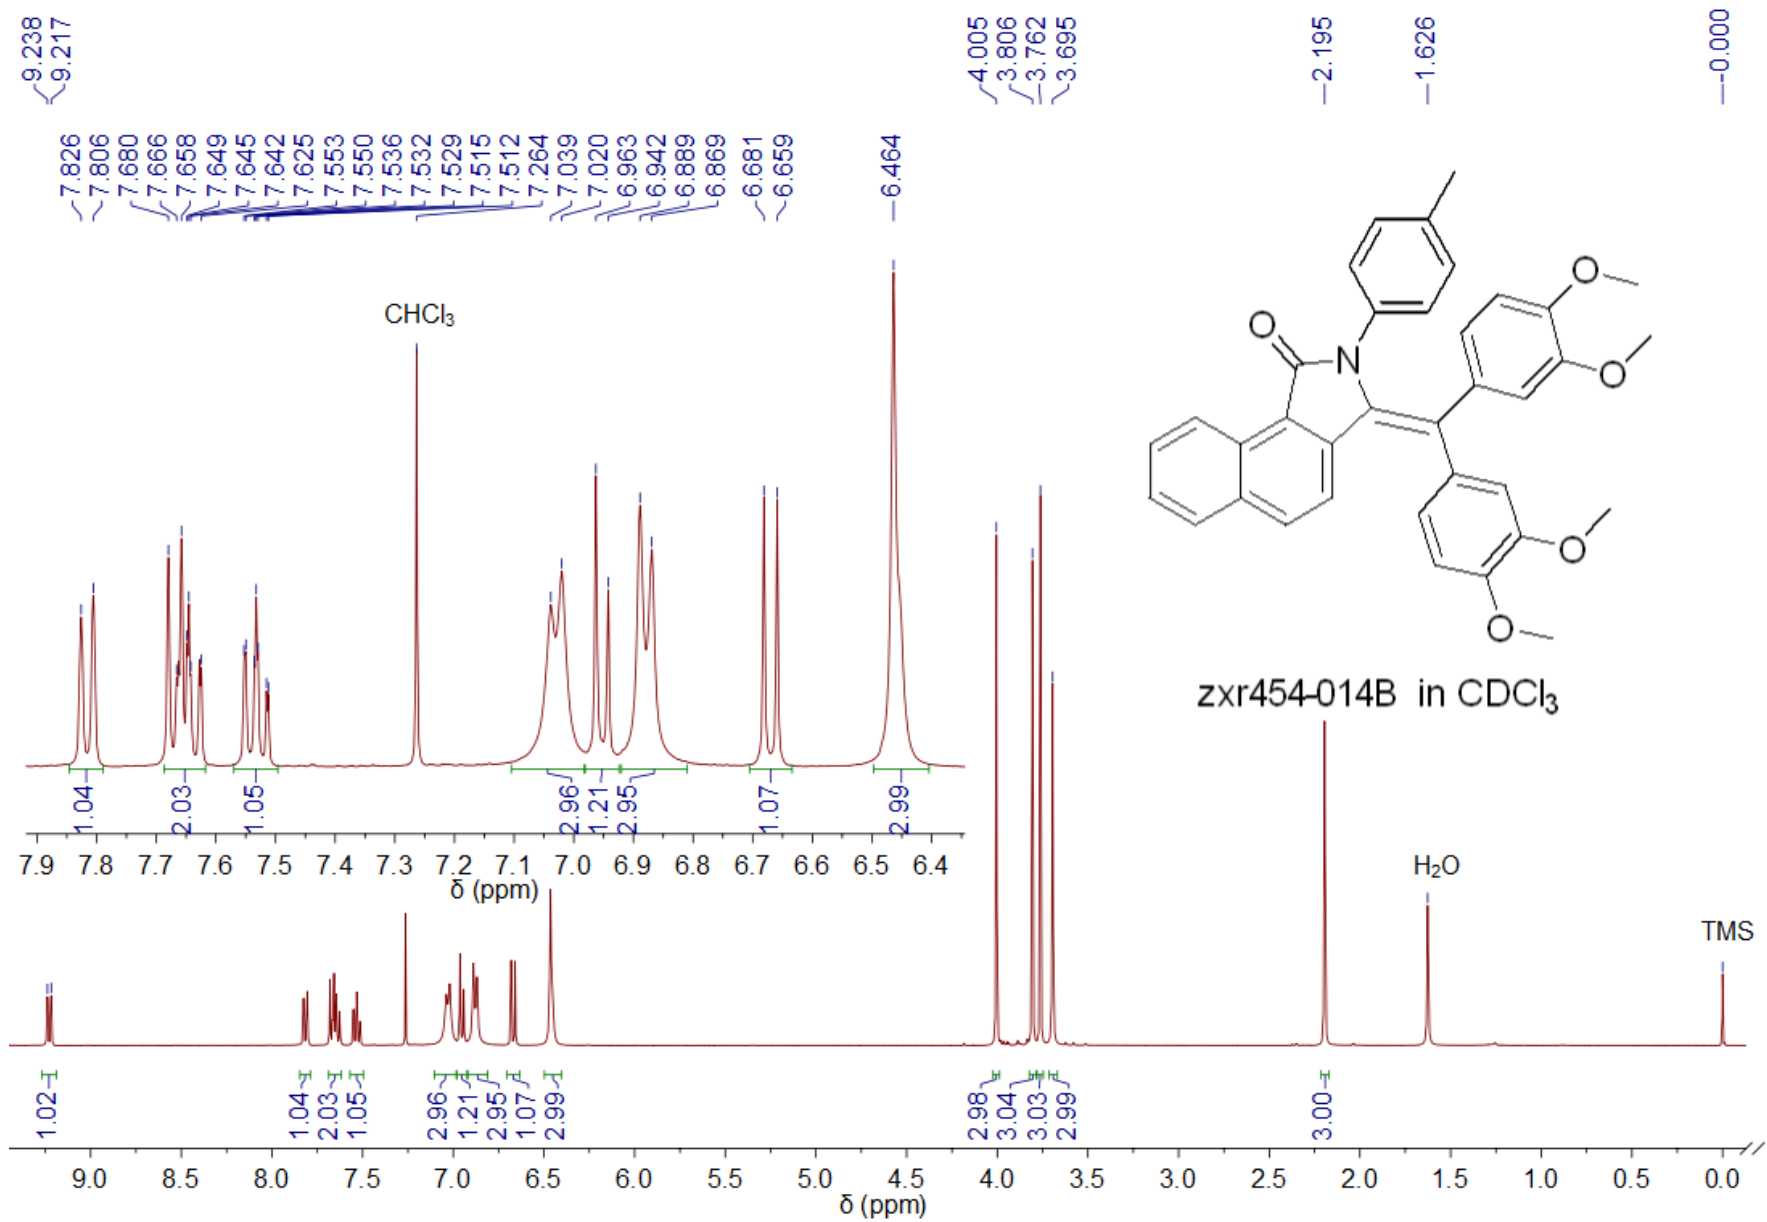

4i - <sup>1</sup>H NMR

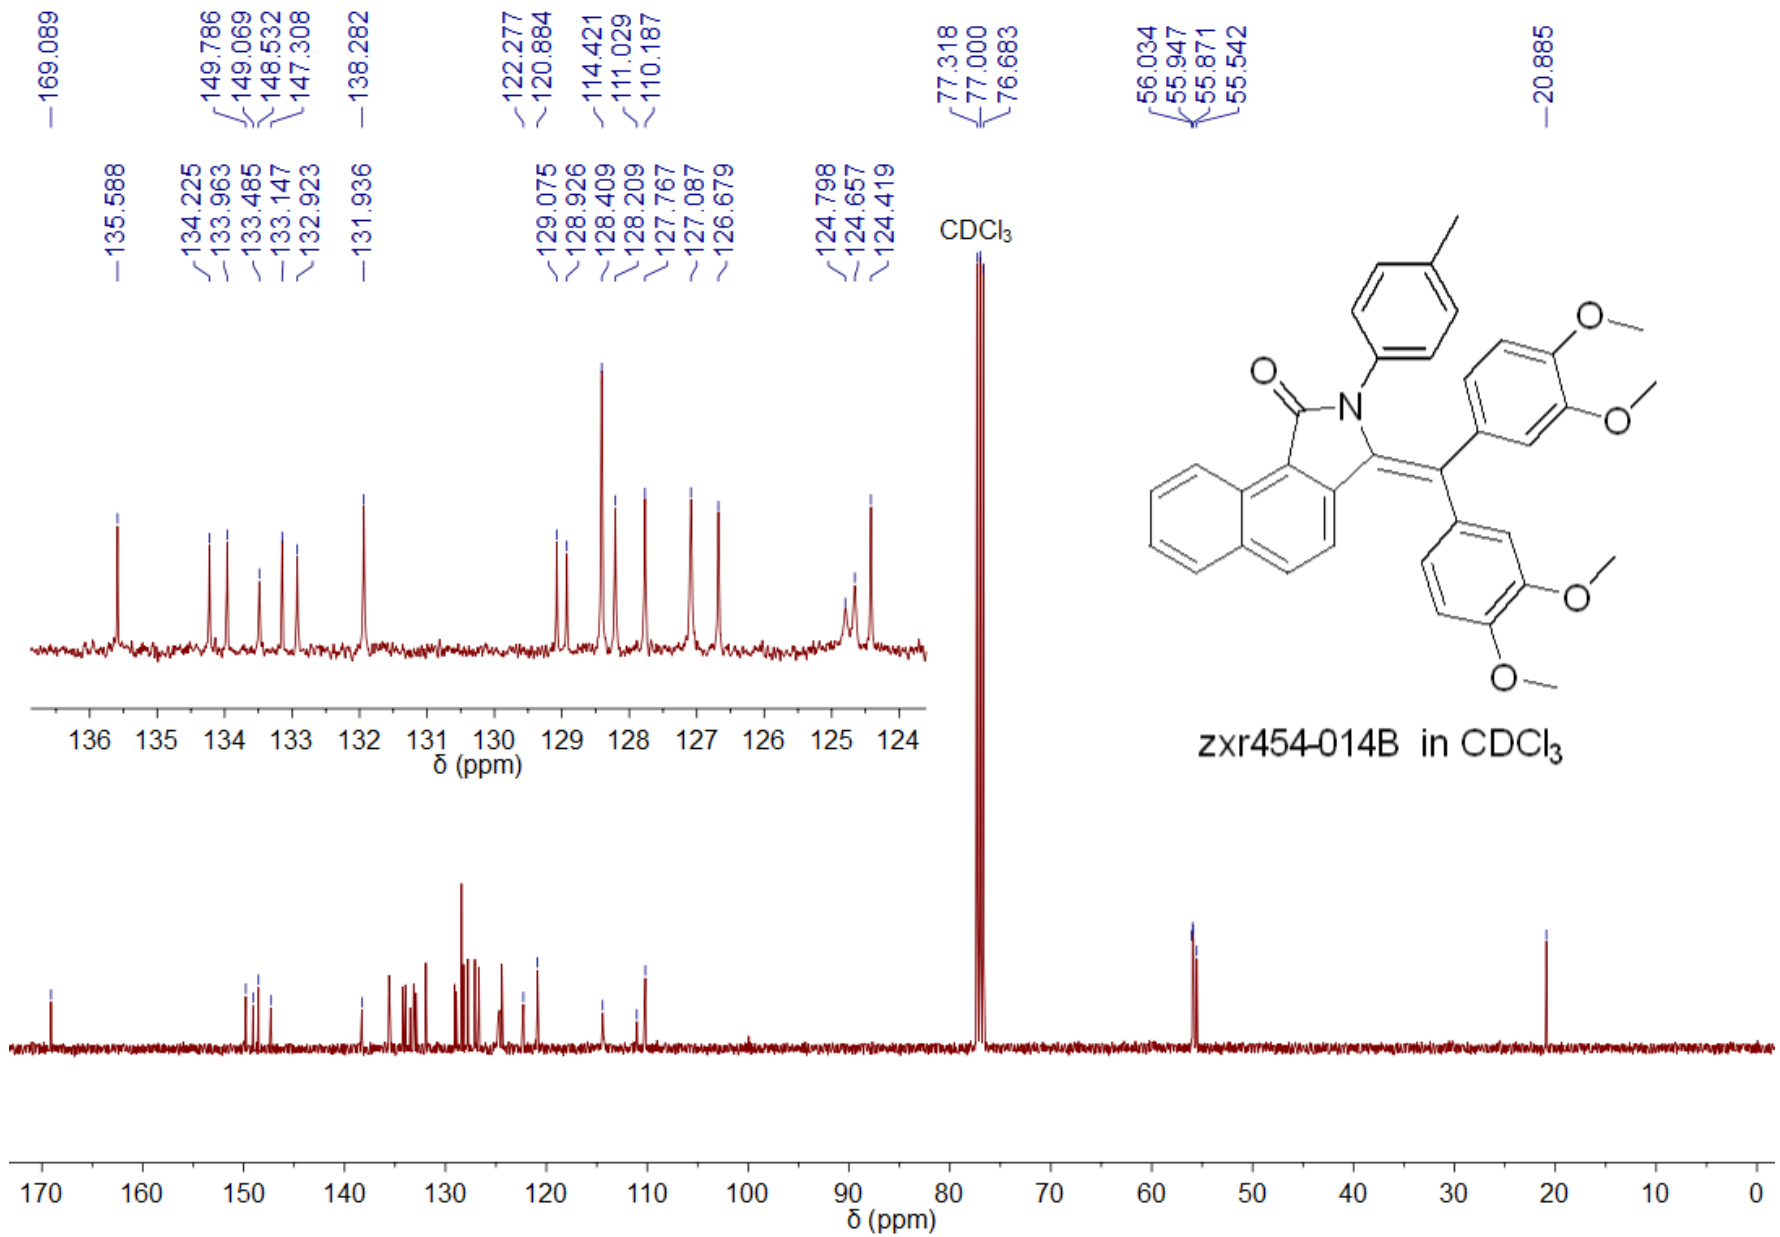

**4i** - <sup>13</sup>C NMR



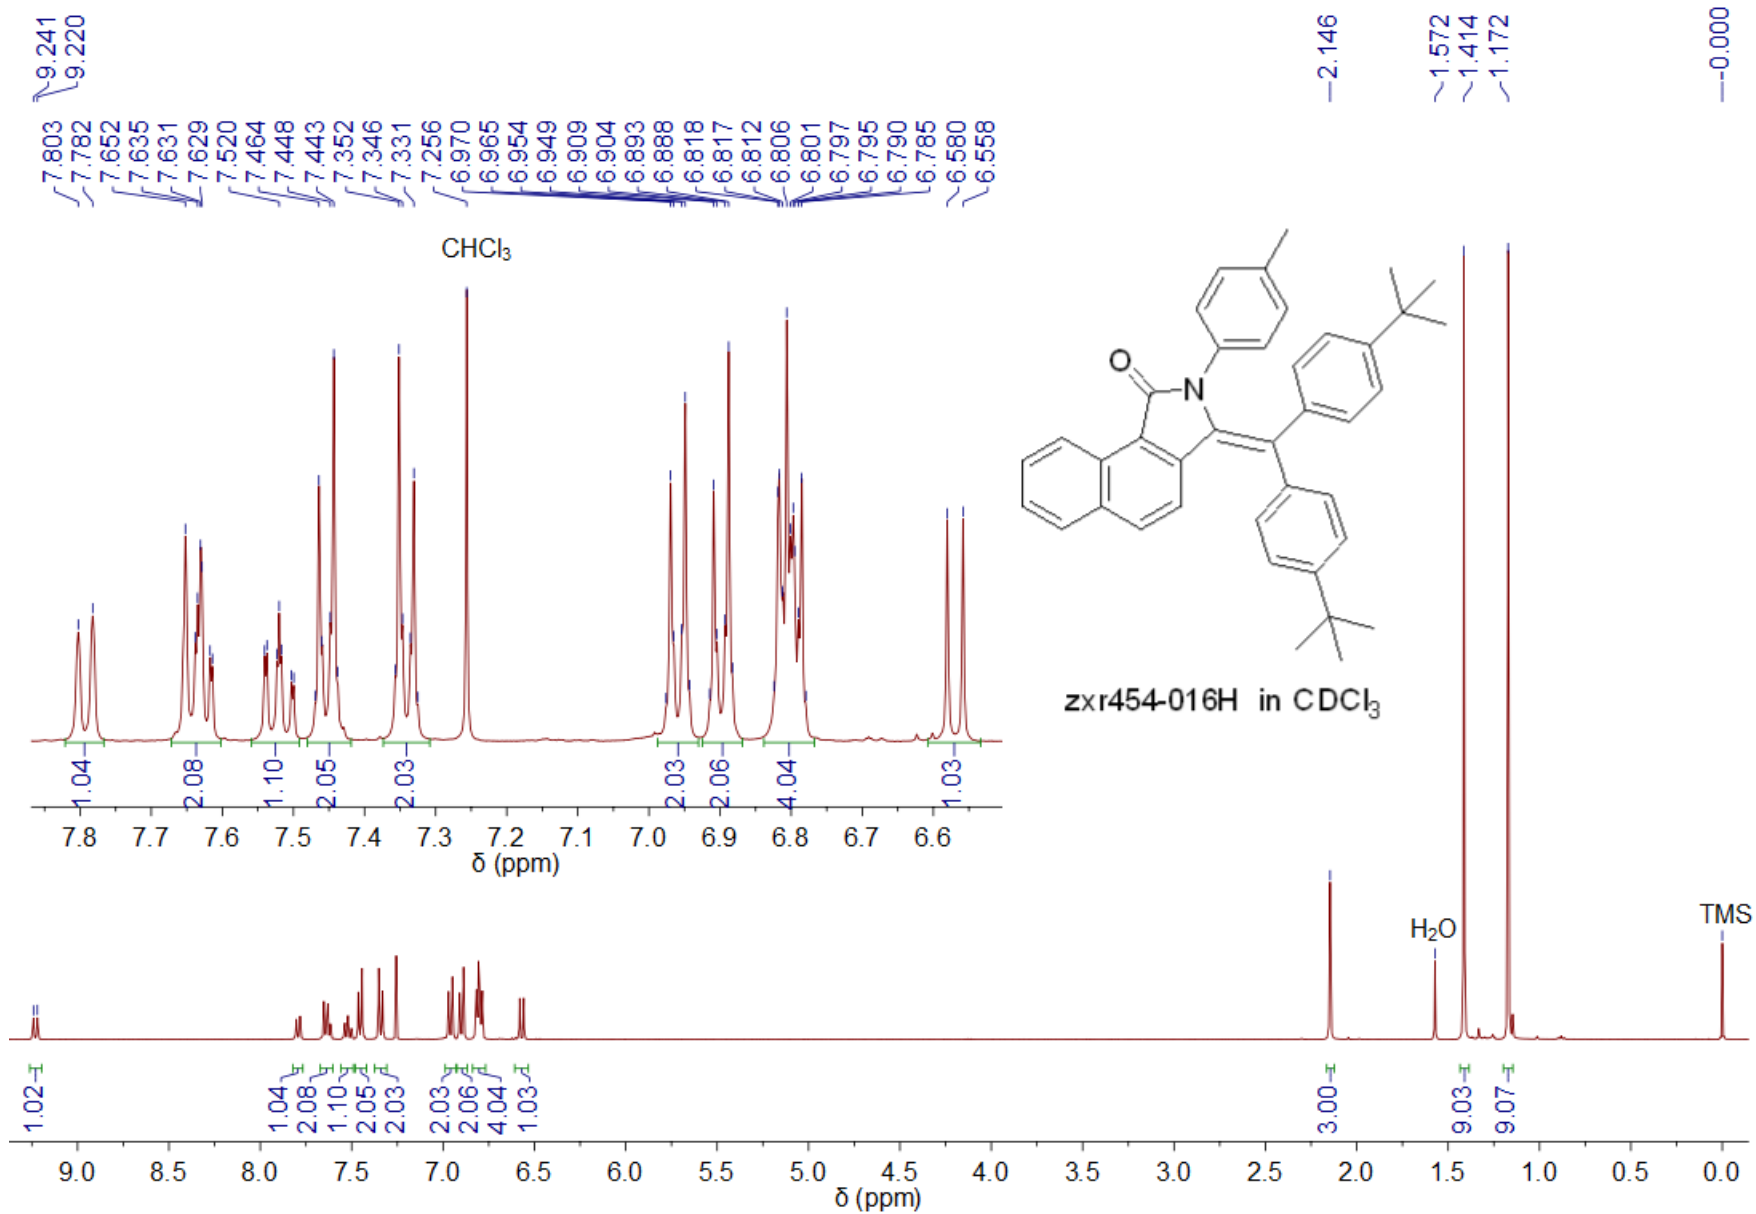

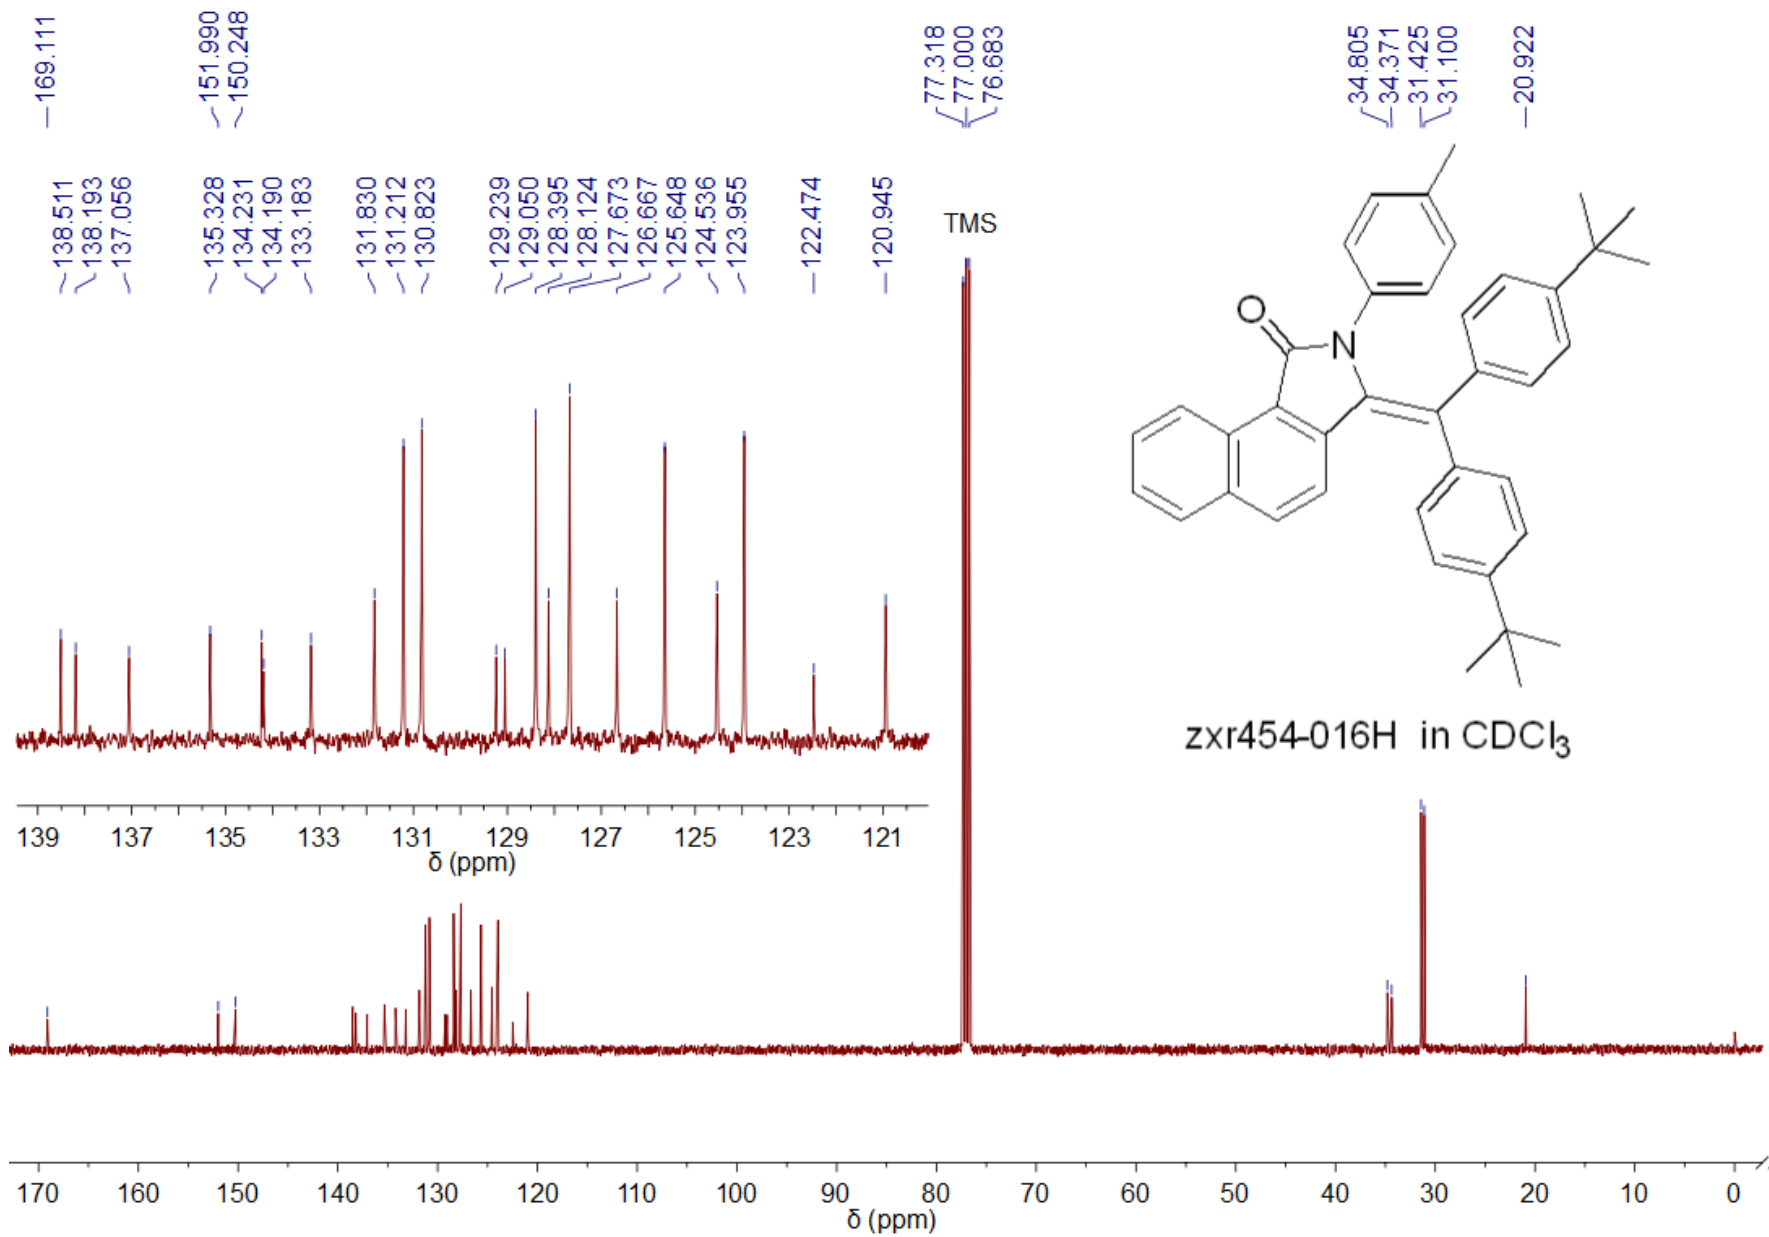

**4j** – <sup>13</sup>C NMR

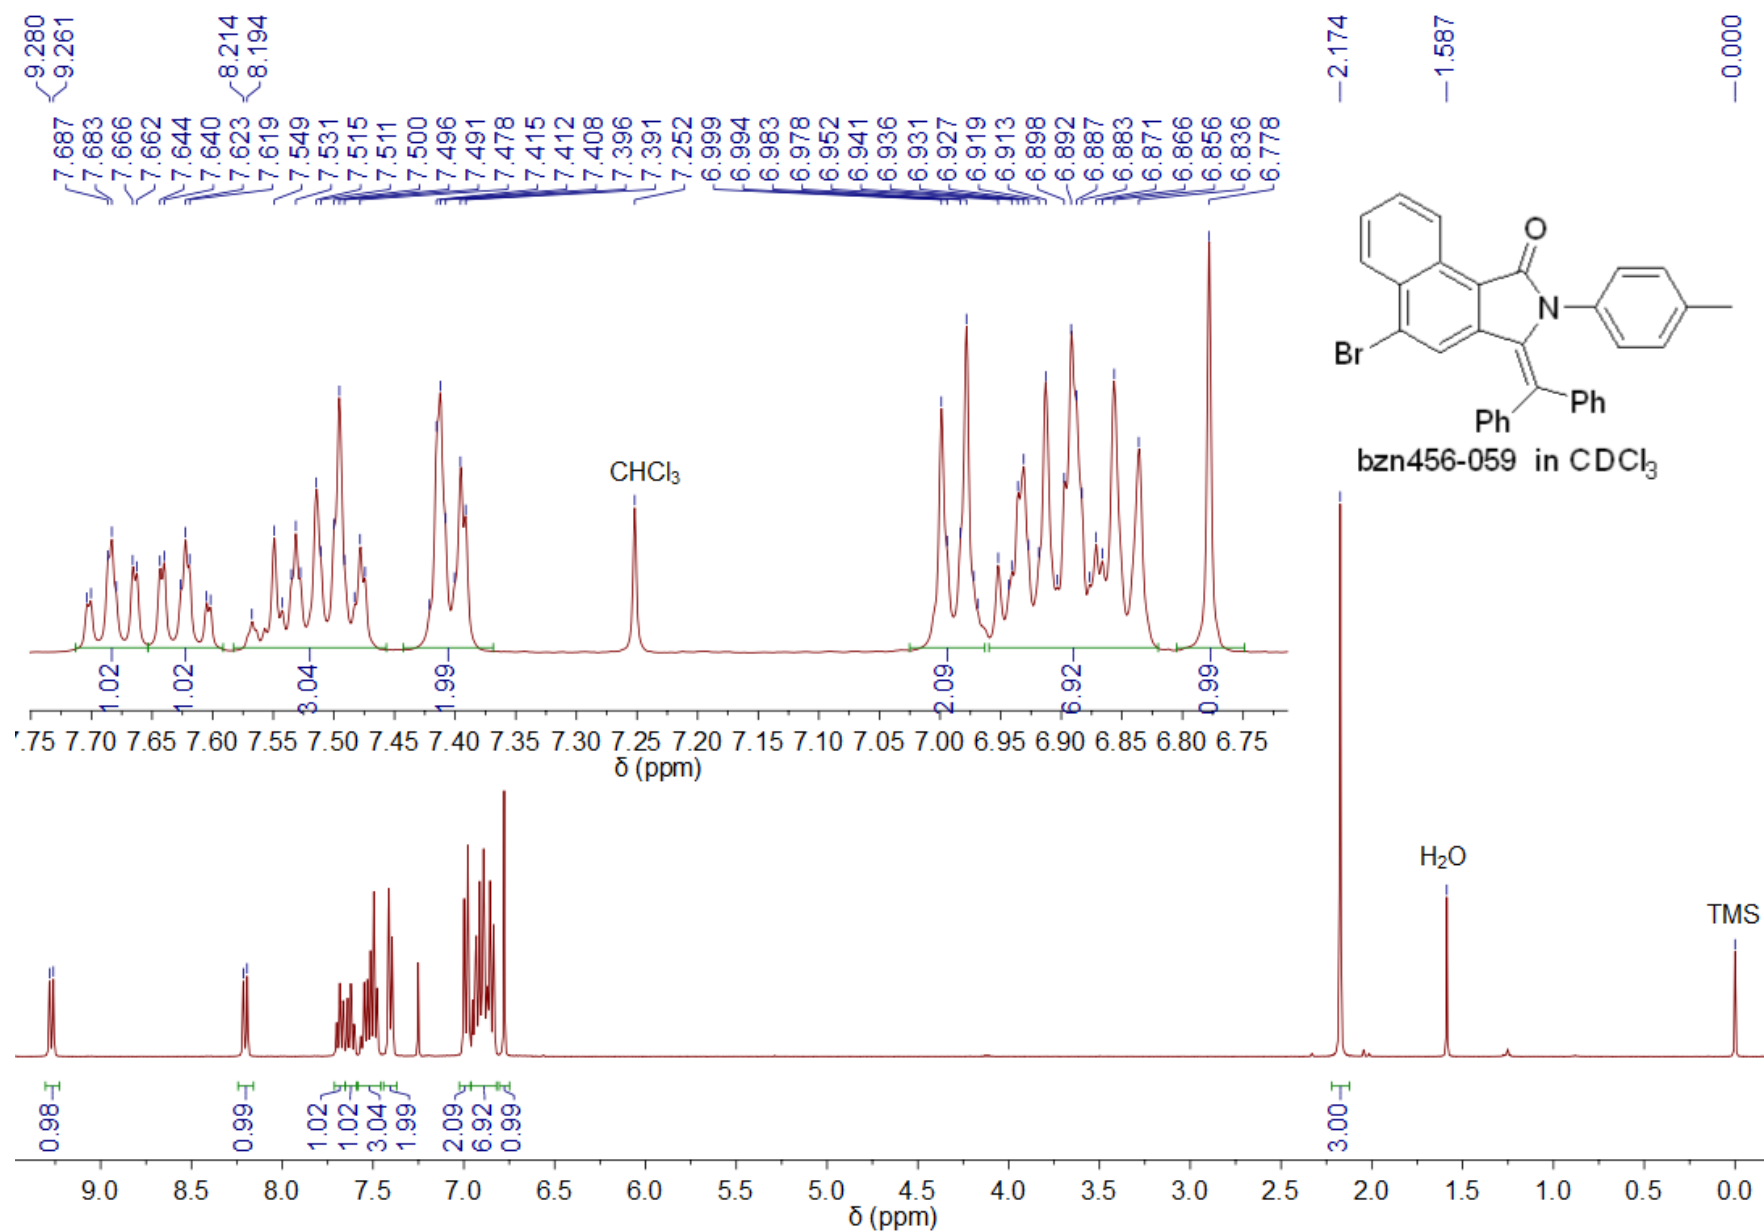

**4k** - <sup>1</sup>H NMR

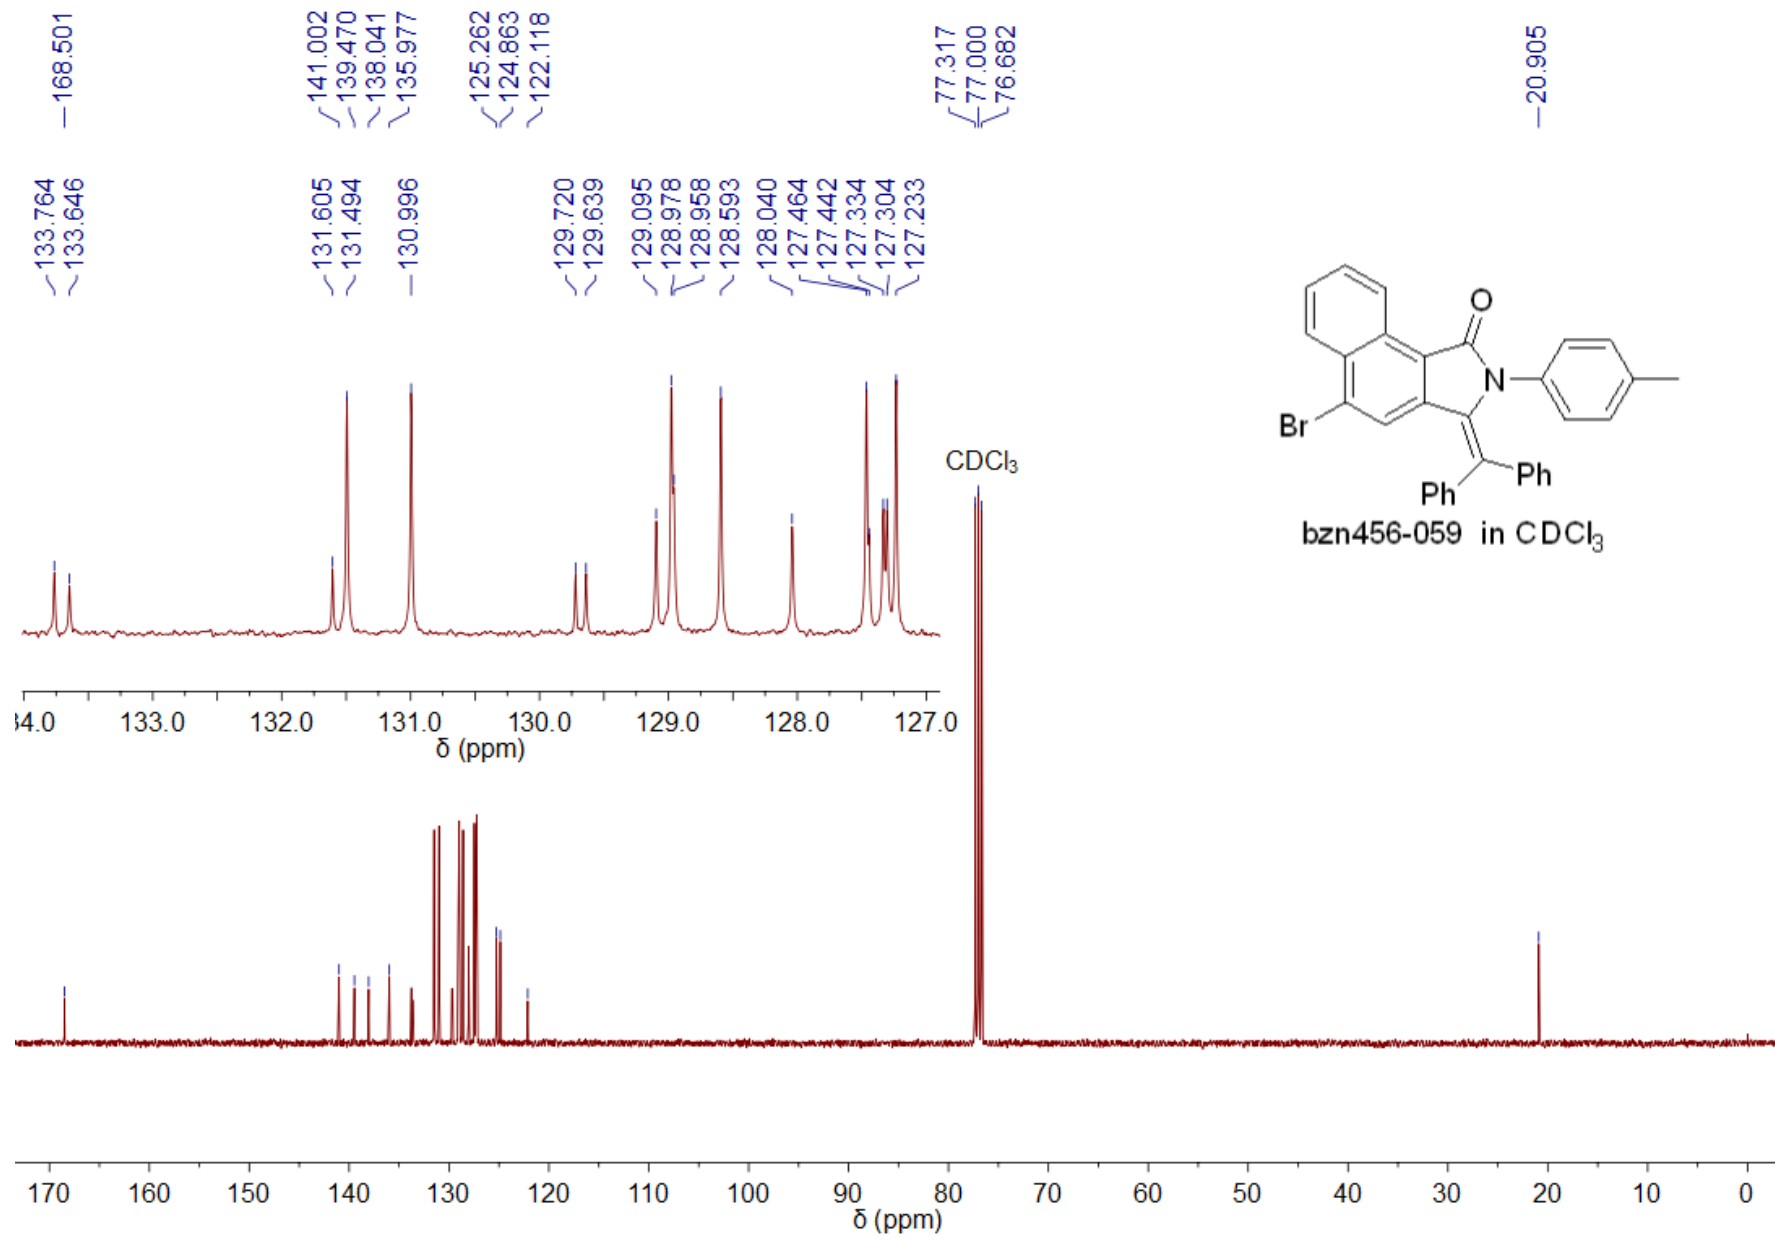

**4k** – <sup>13</sup>C NMR

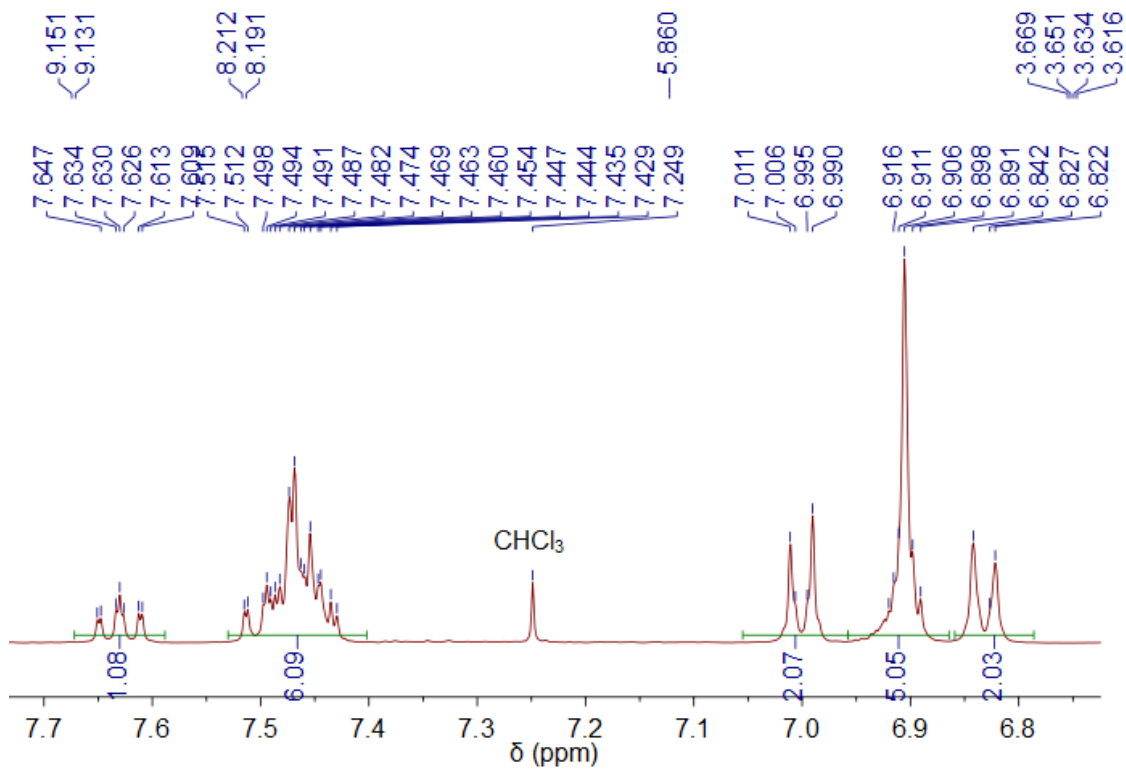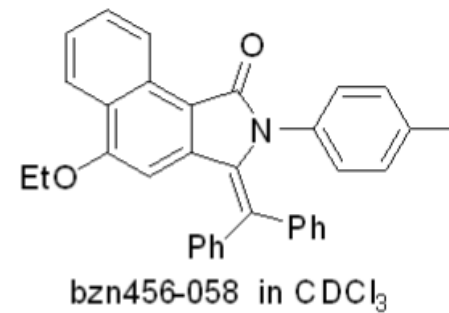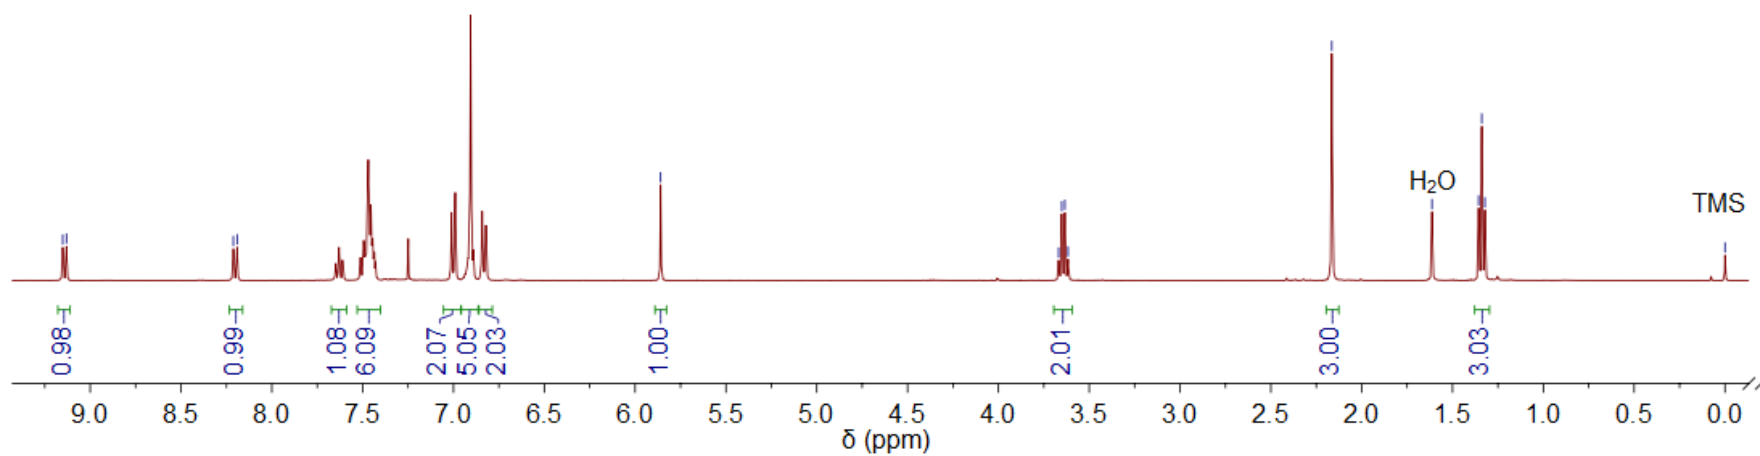

4I - <sup>1</sup>H NMR

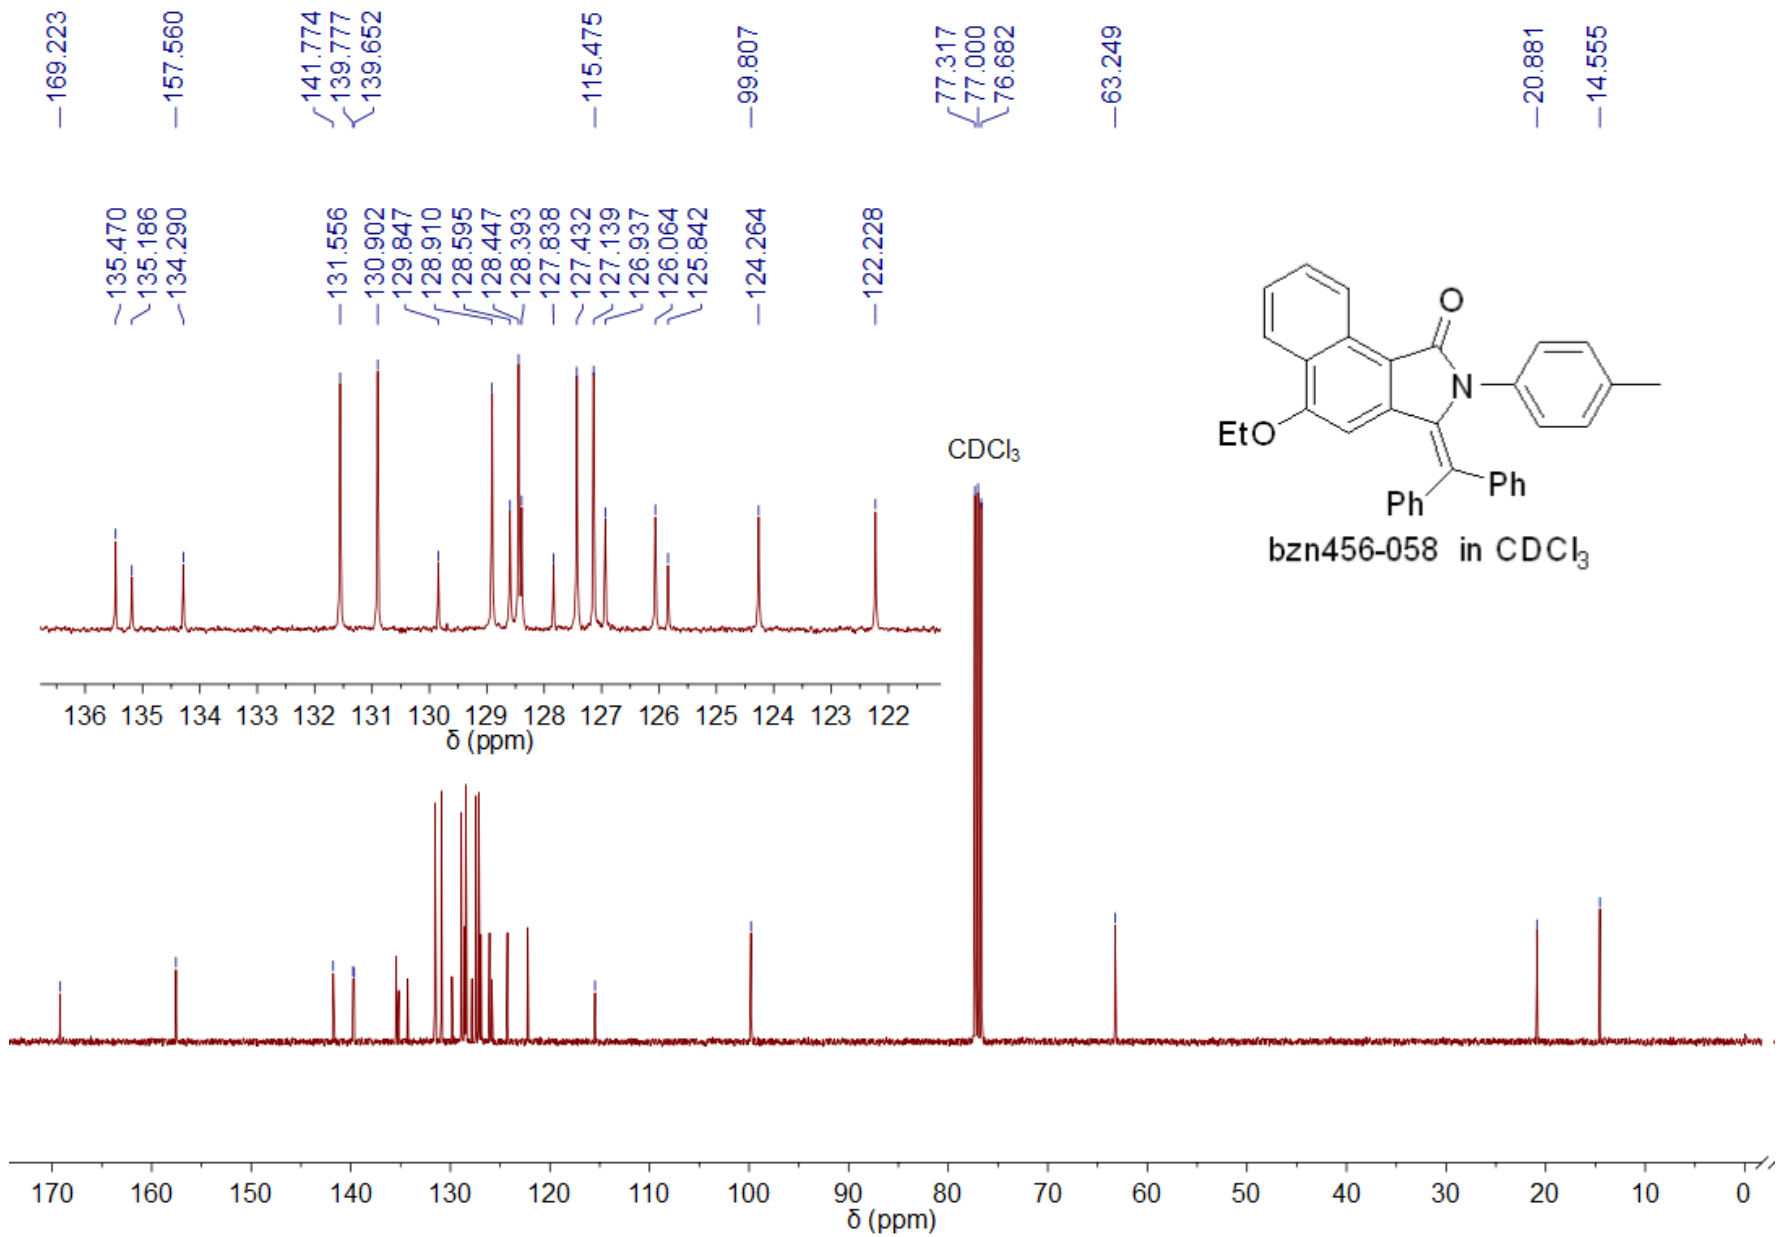

**4I** – <sup>13</sup>C NMR

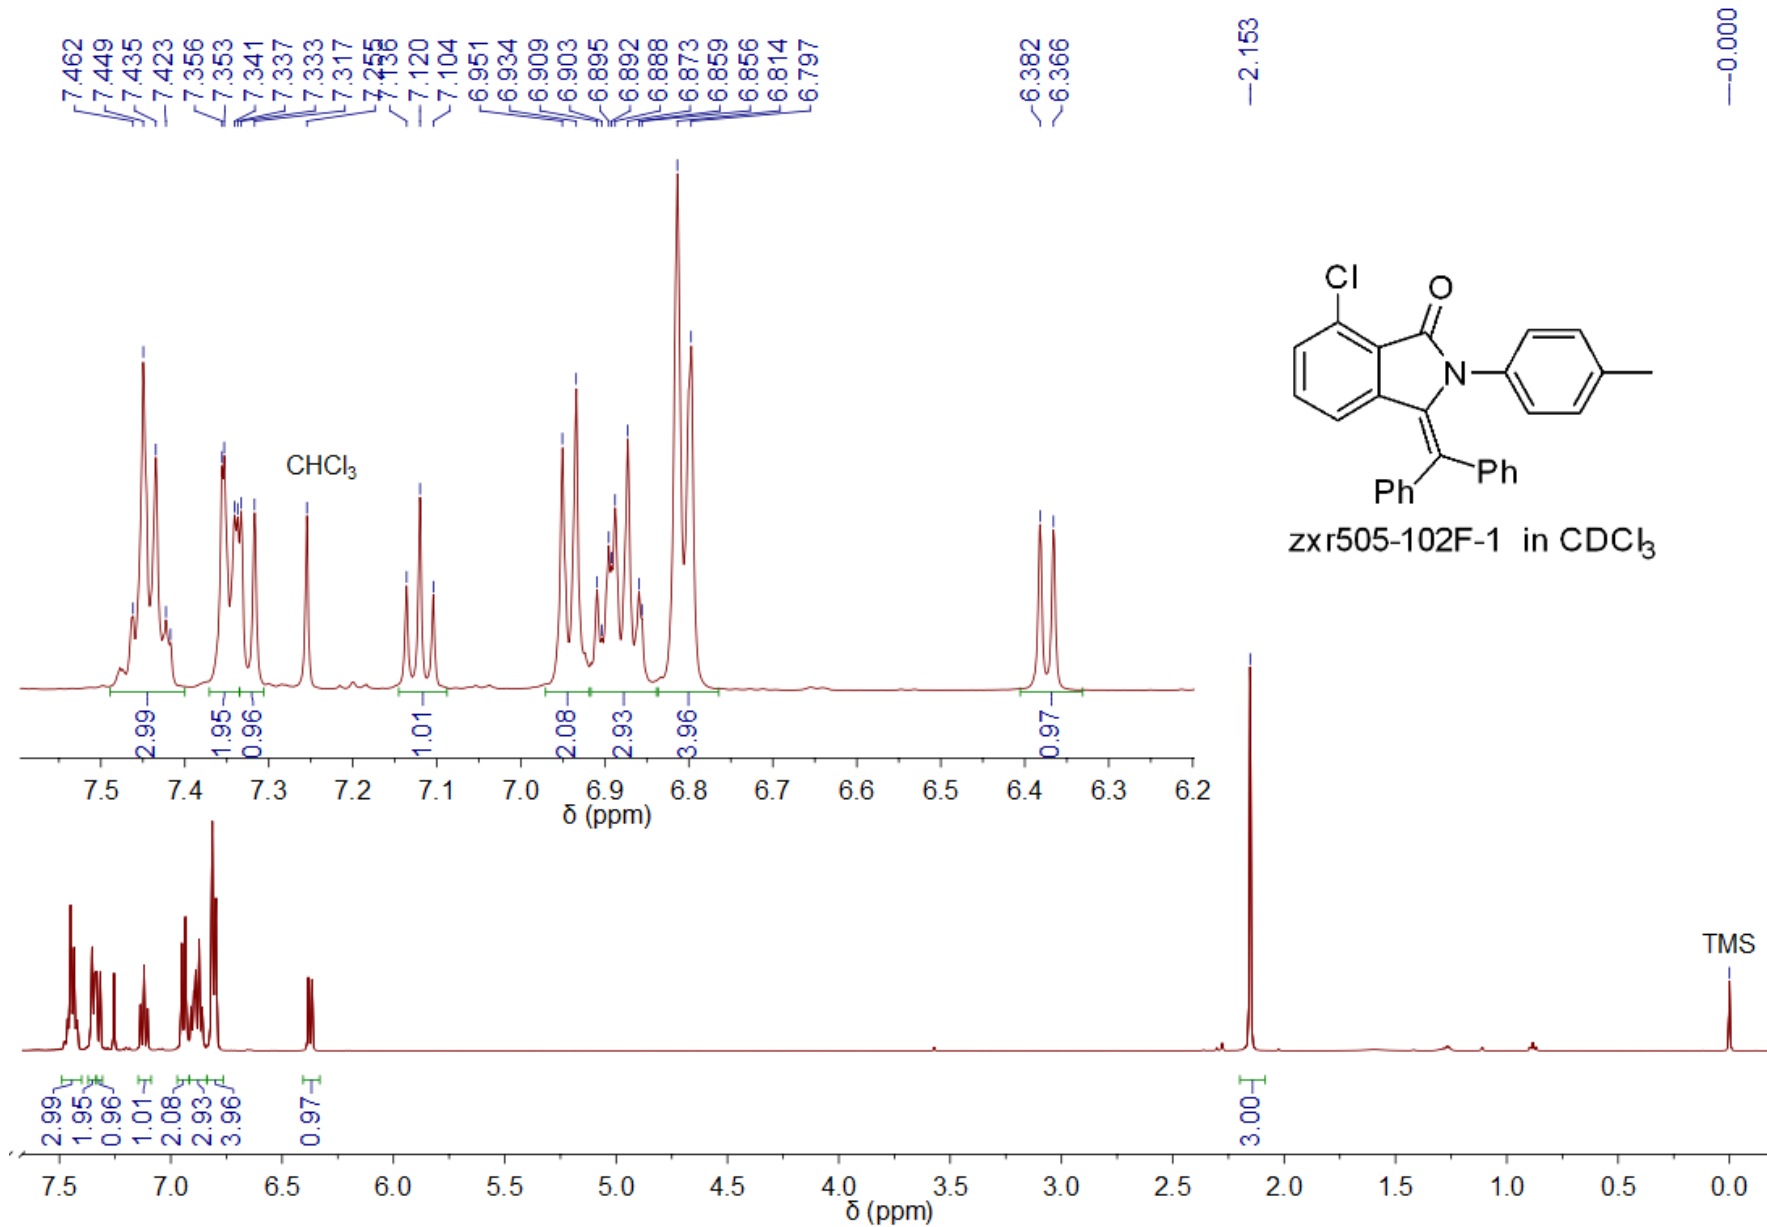

**4m** -  $^1\text{H NMR}$

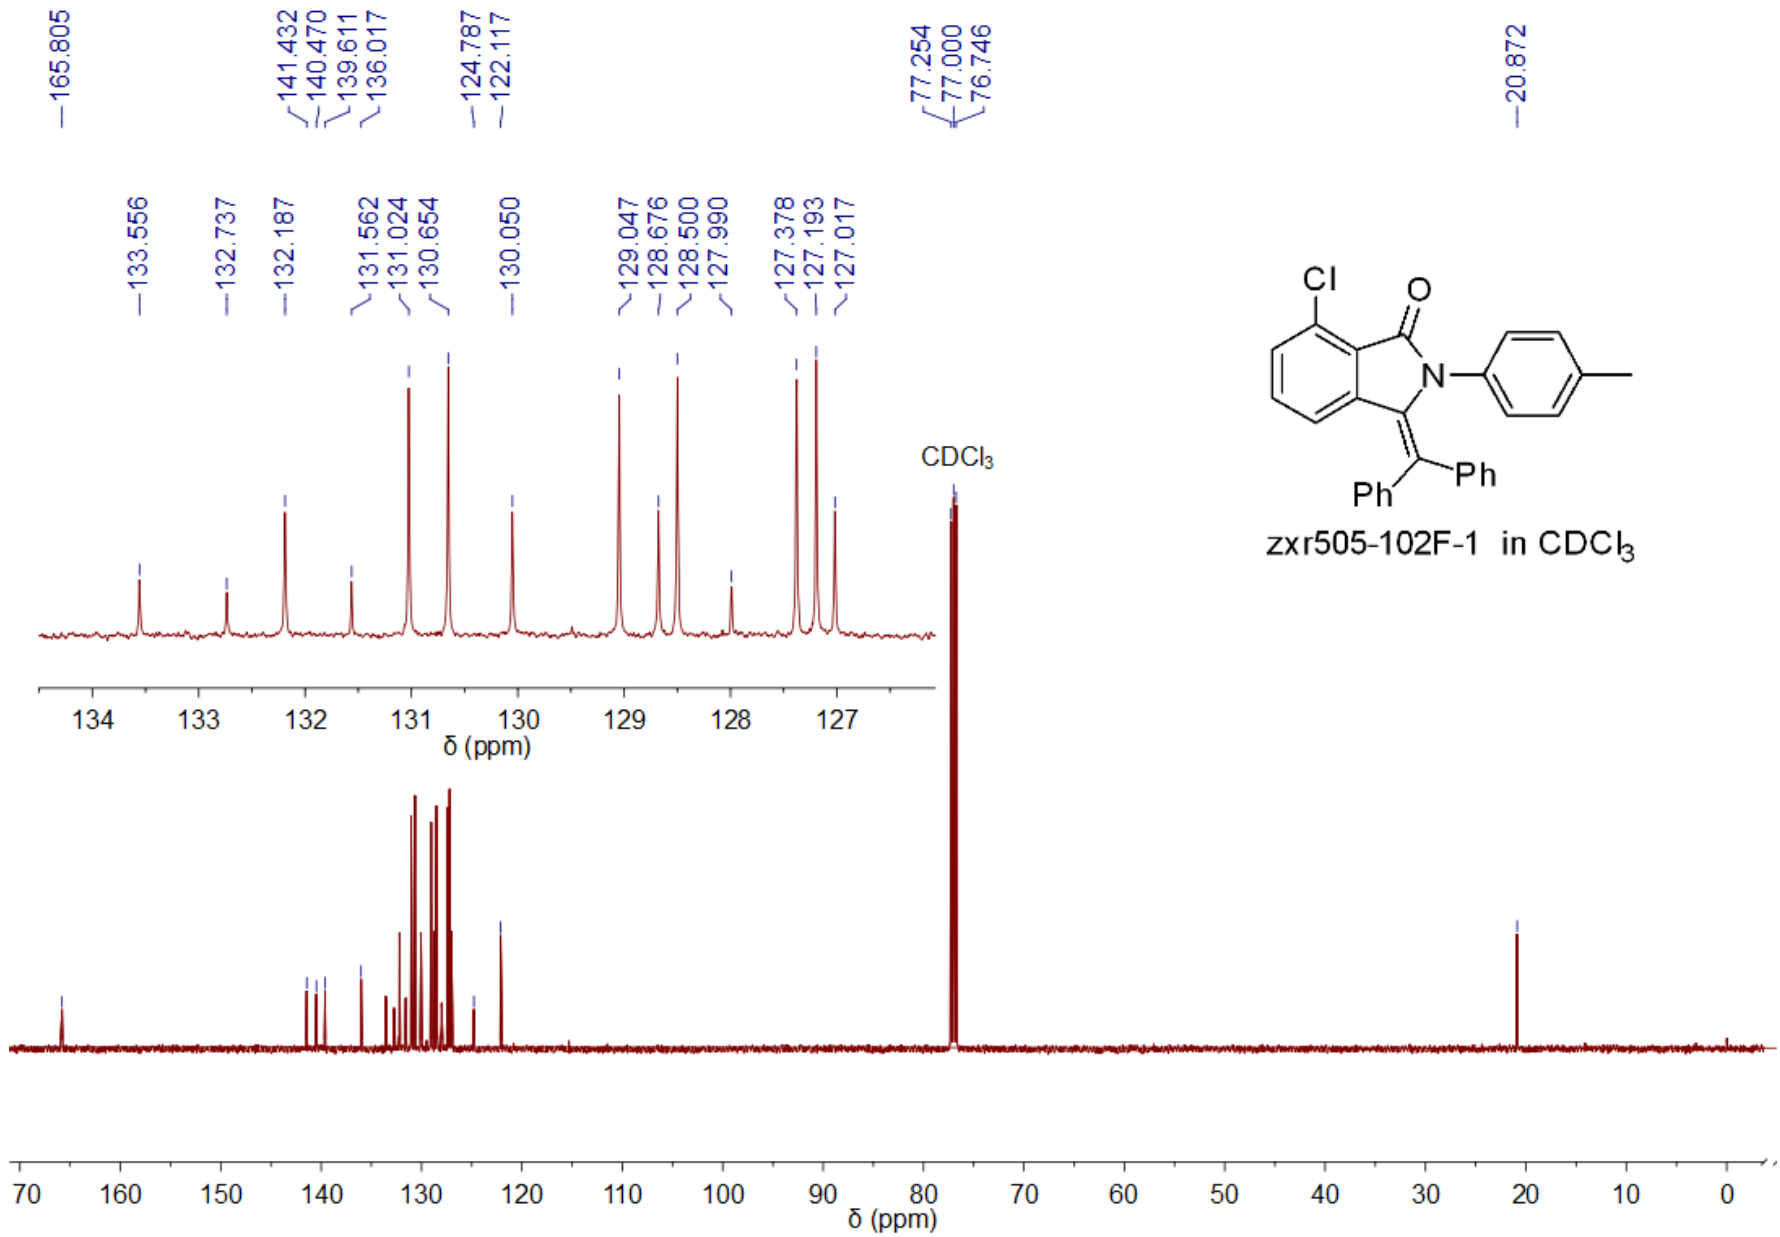

4m -  $^{13}\text{C}$  NMR



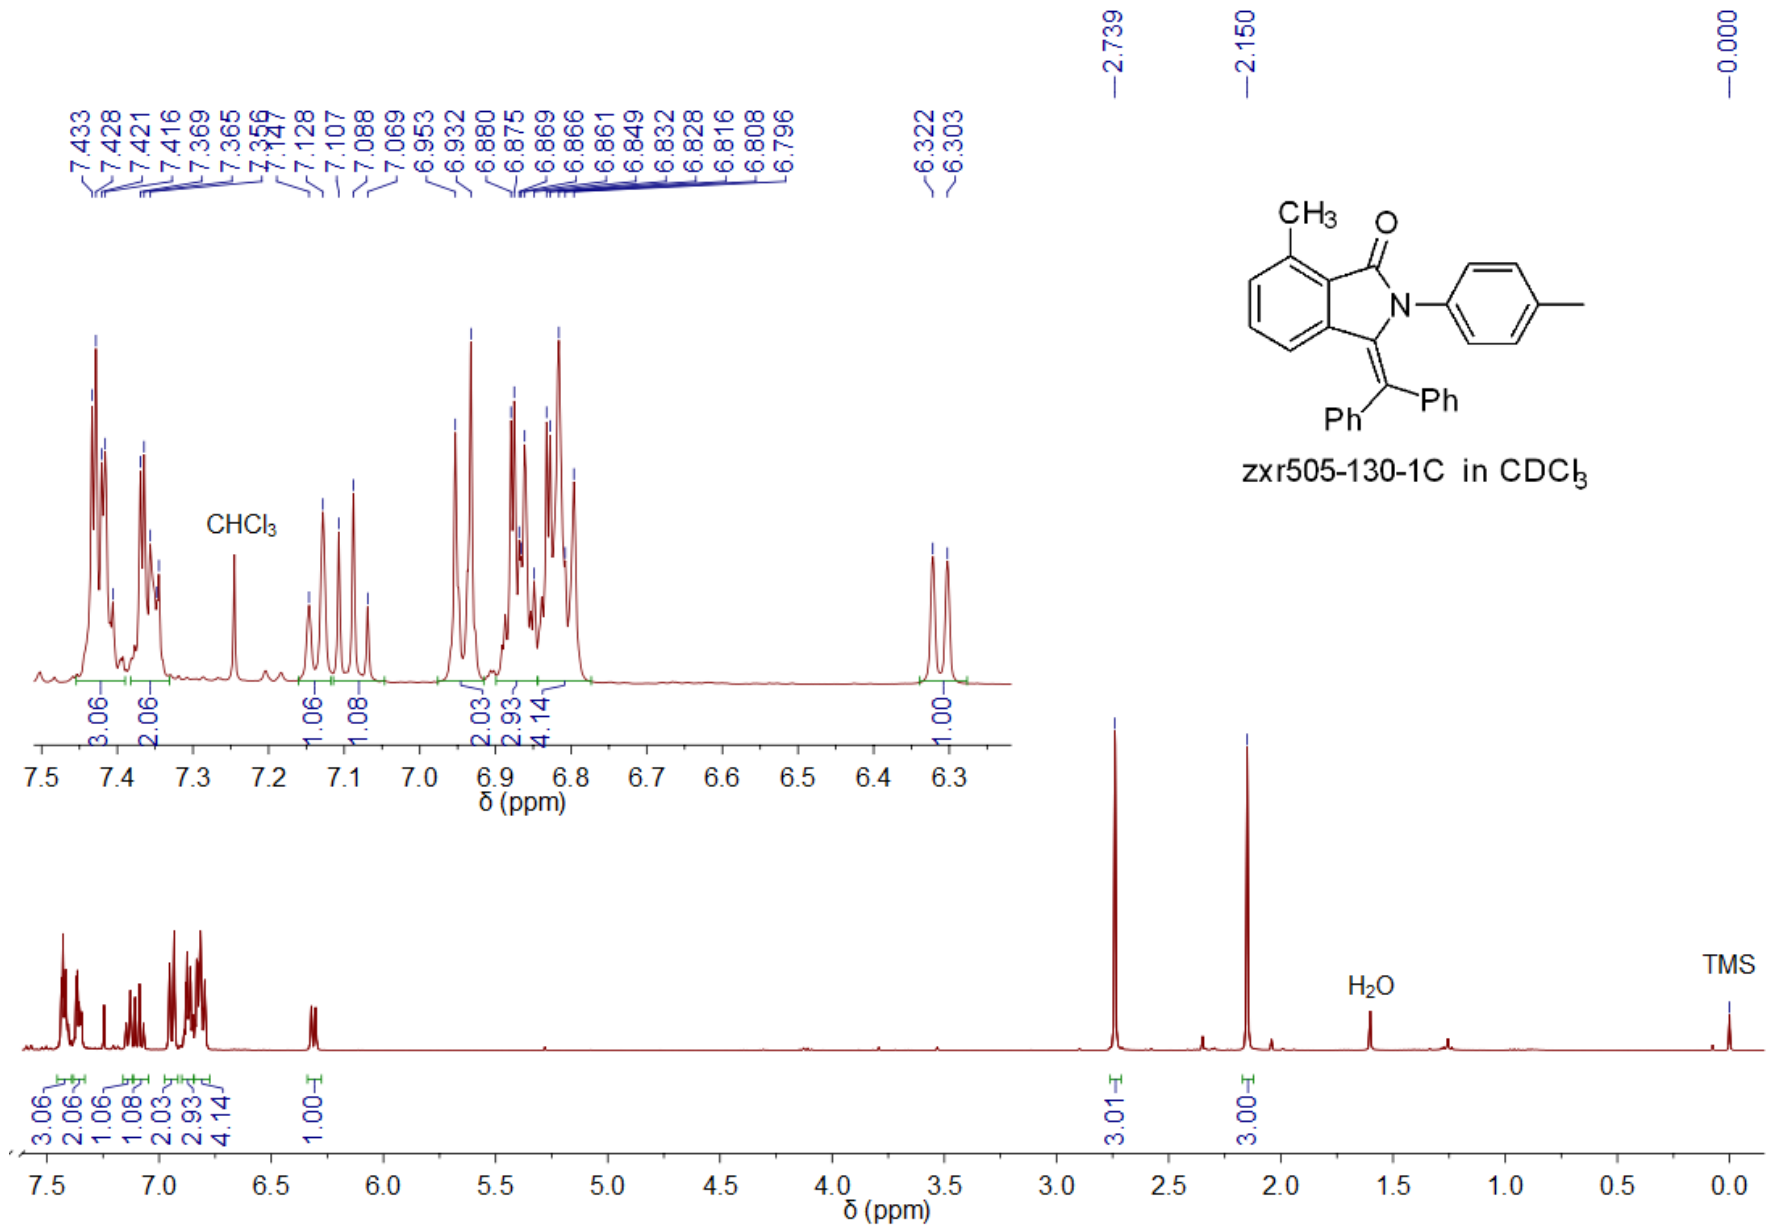

**4n** -  $^1\text{H NMR}$

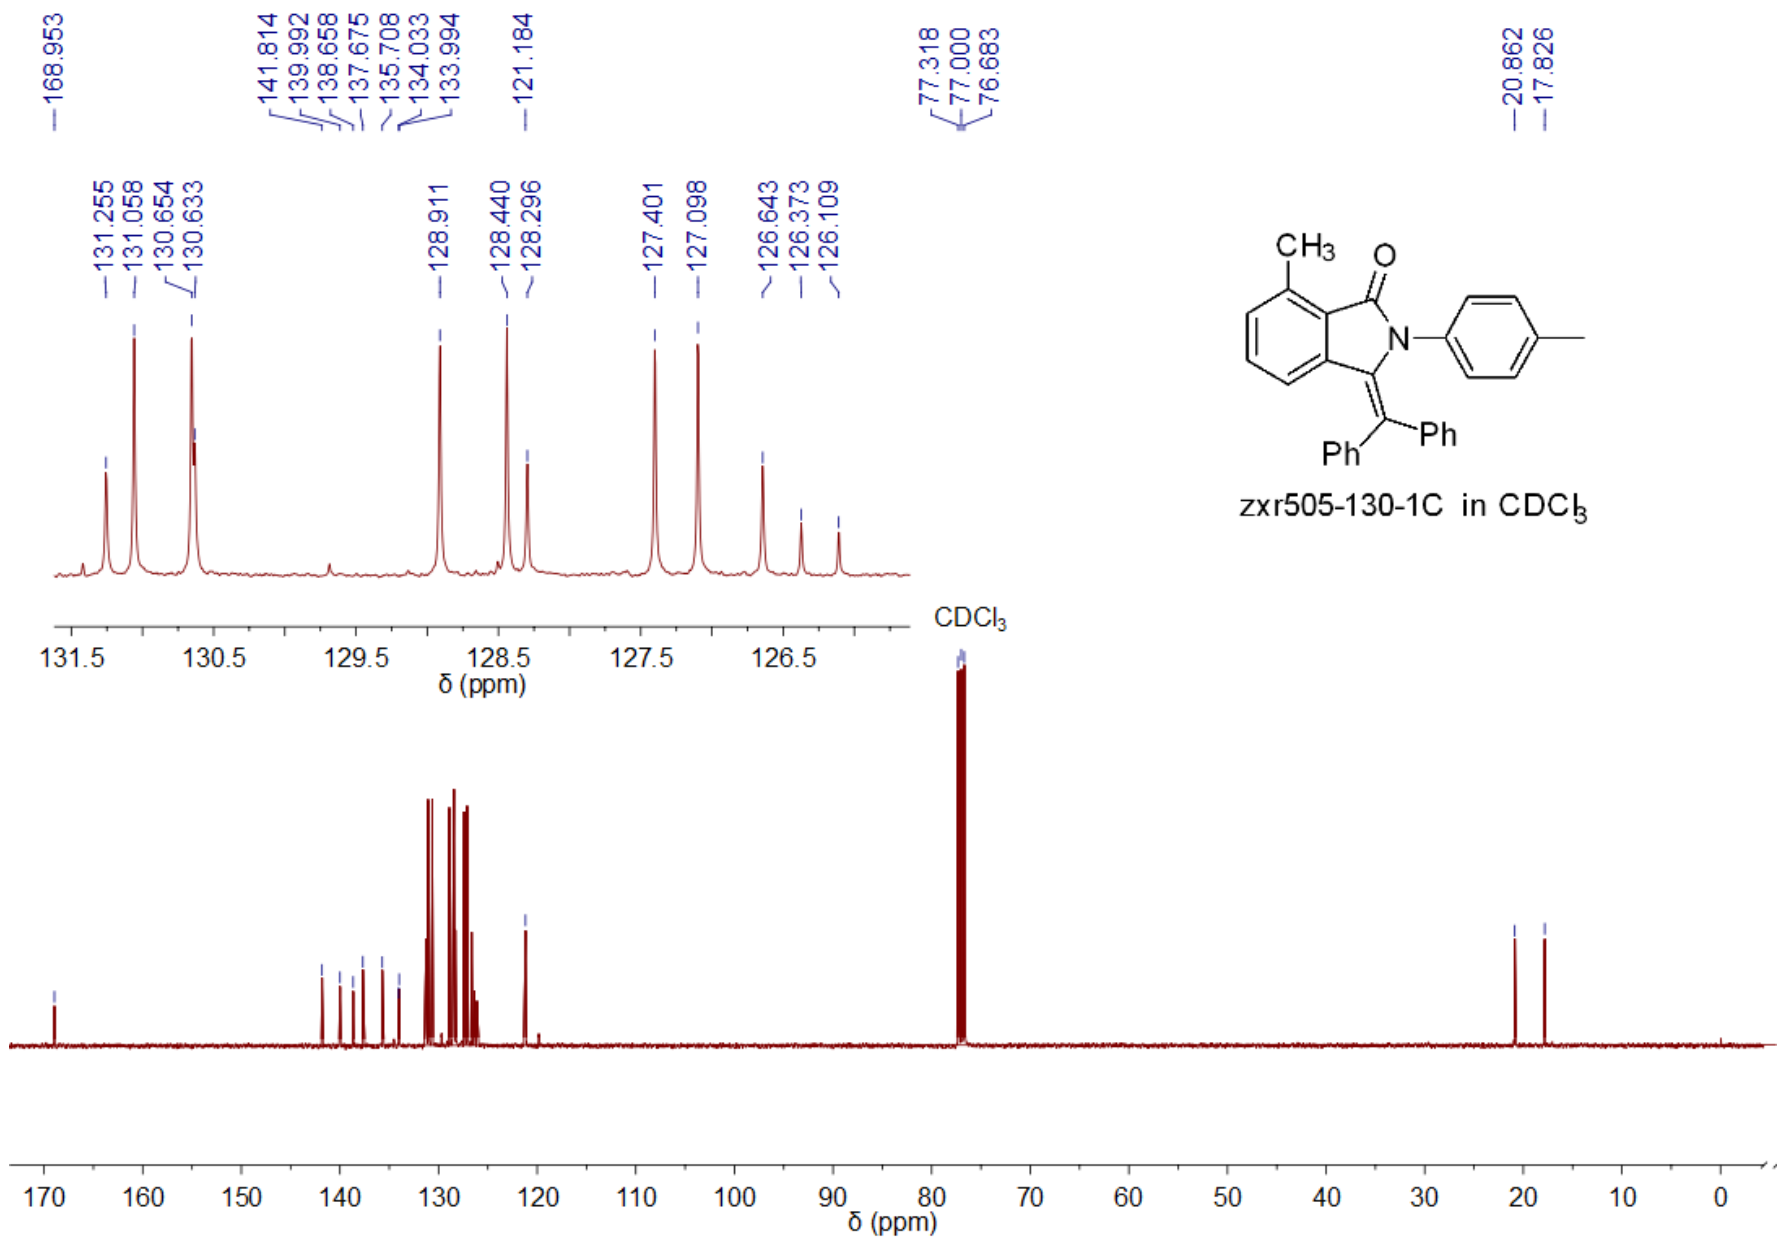

**4n** – <sup>13</sup>C NMR

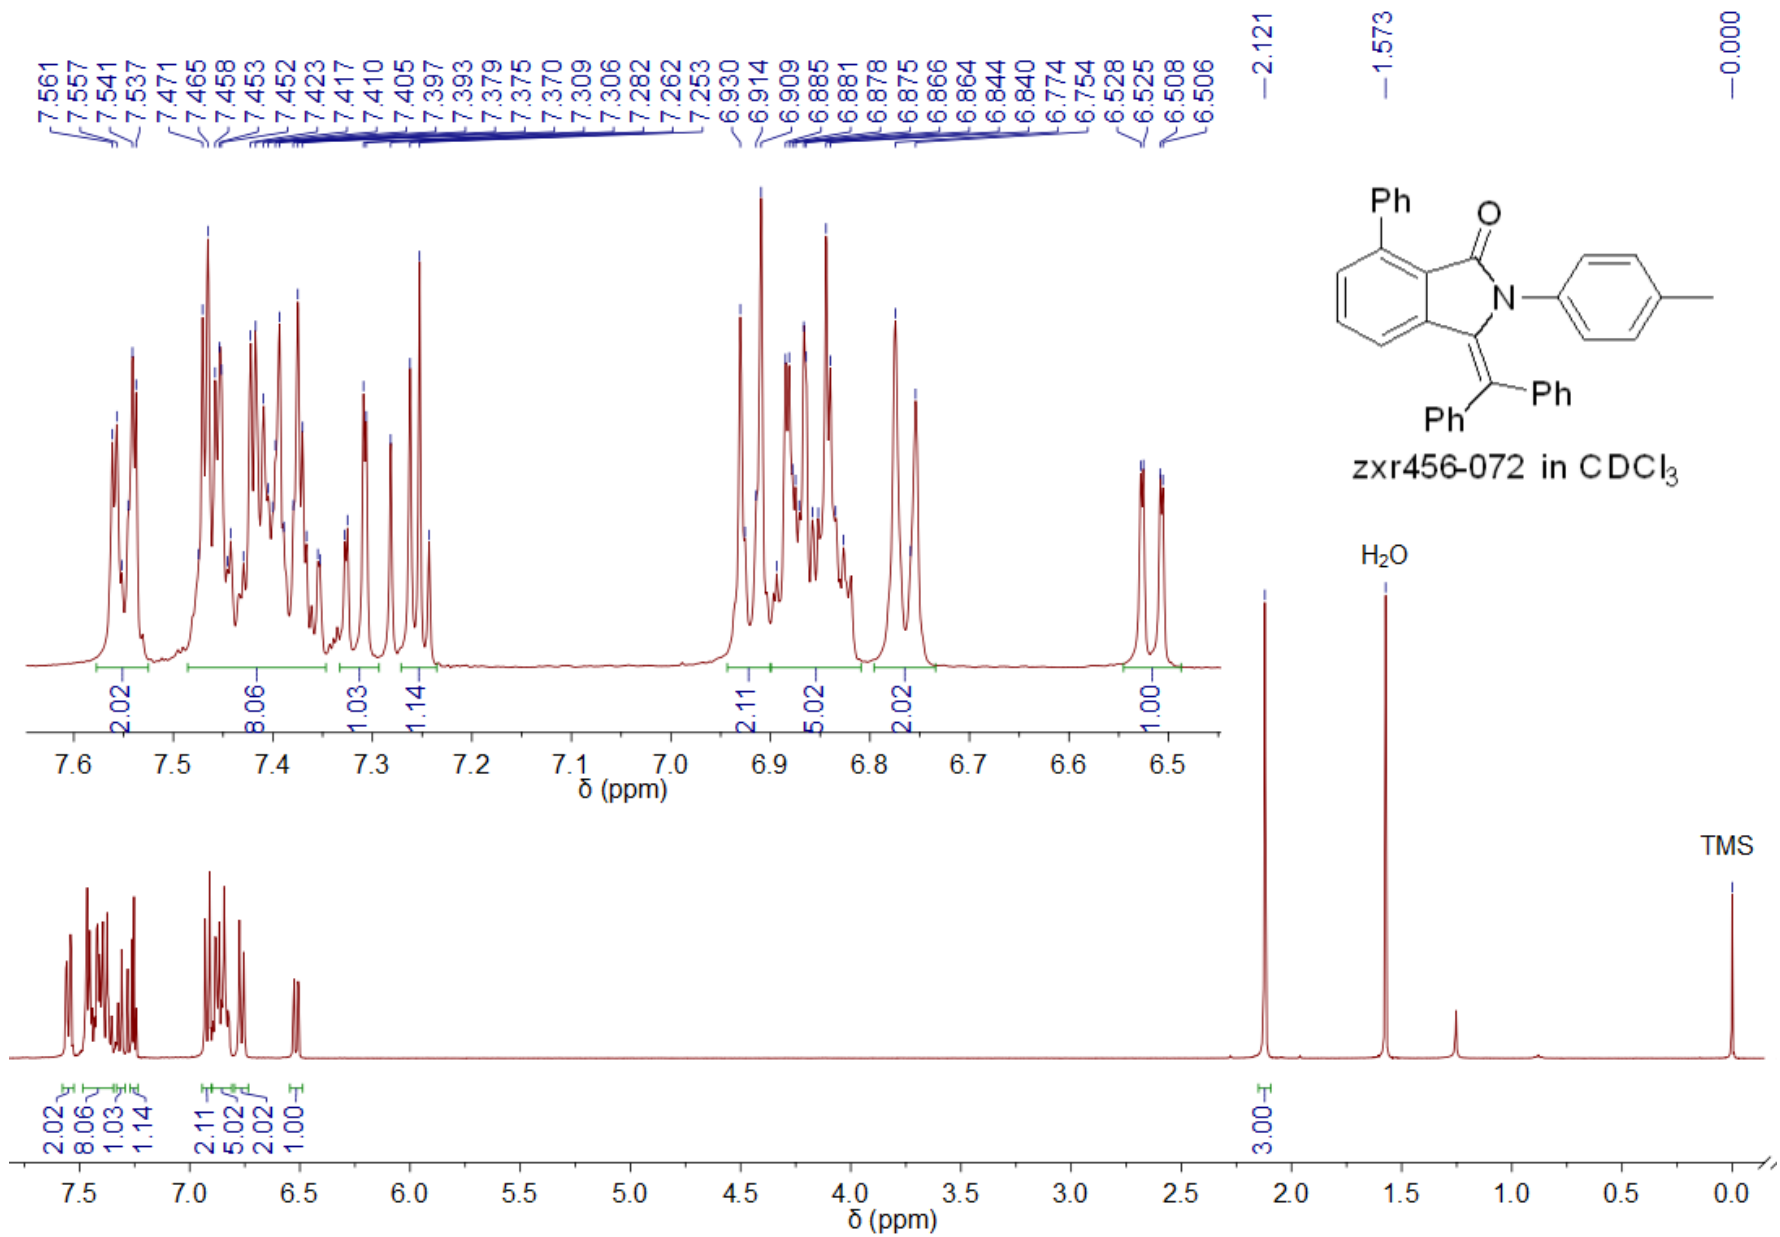

**4o** -  $^1\text{H NMR}$

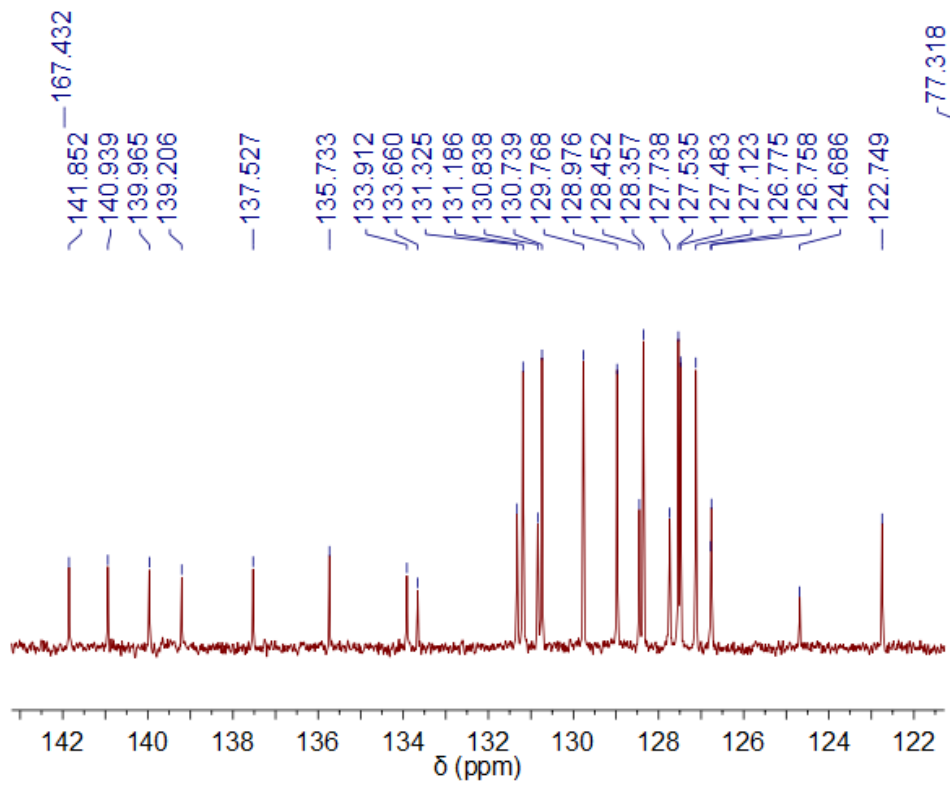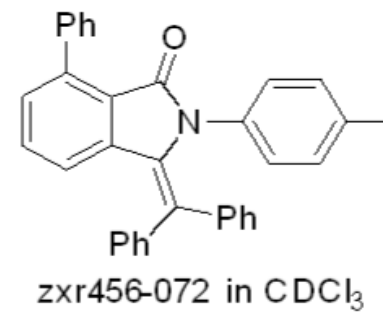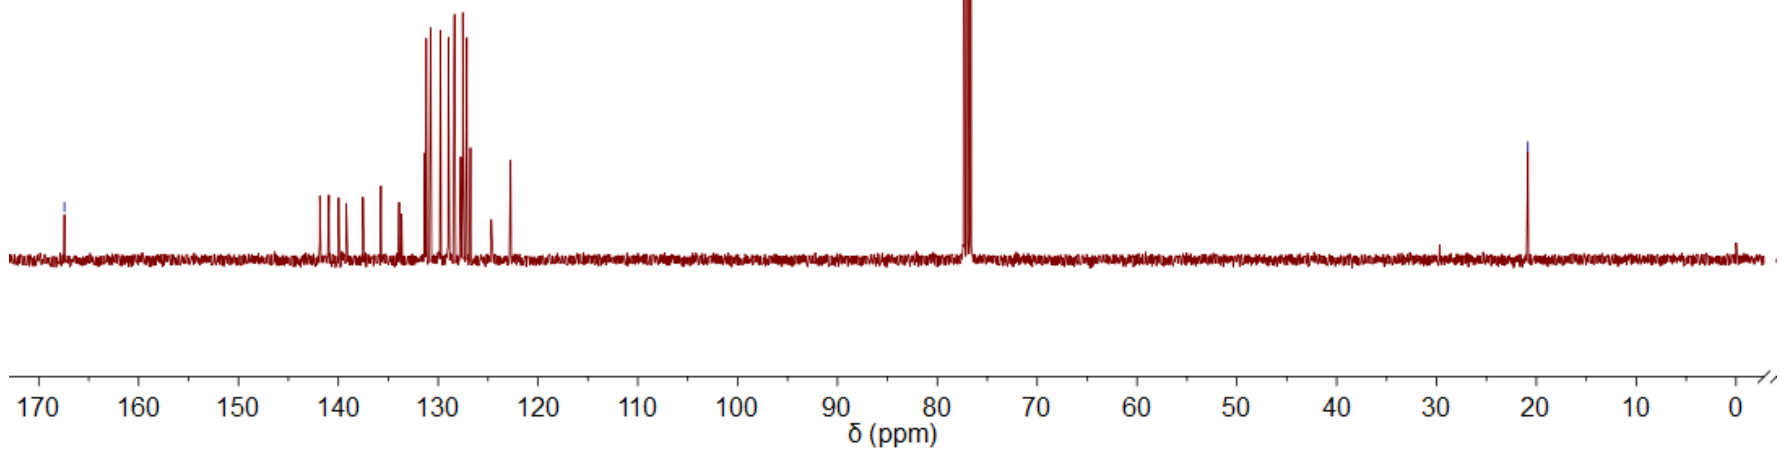

4o - <sup>13</sup>C NMR

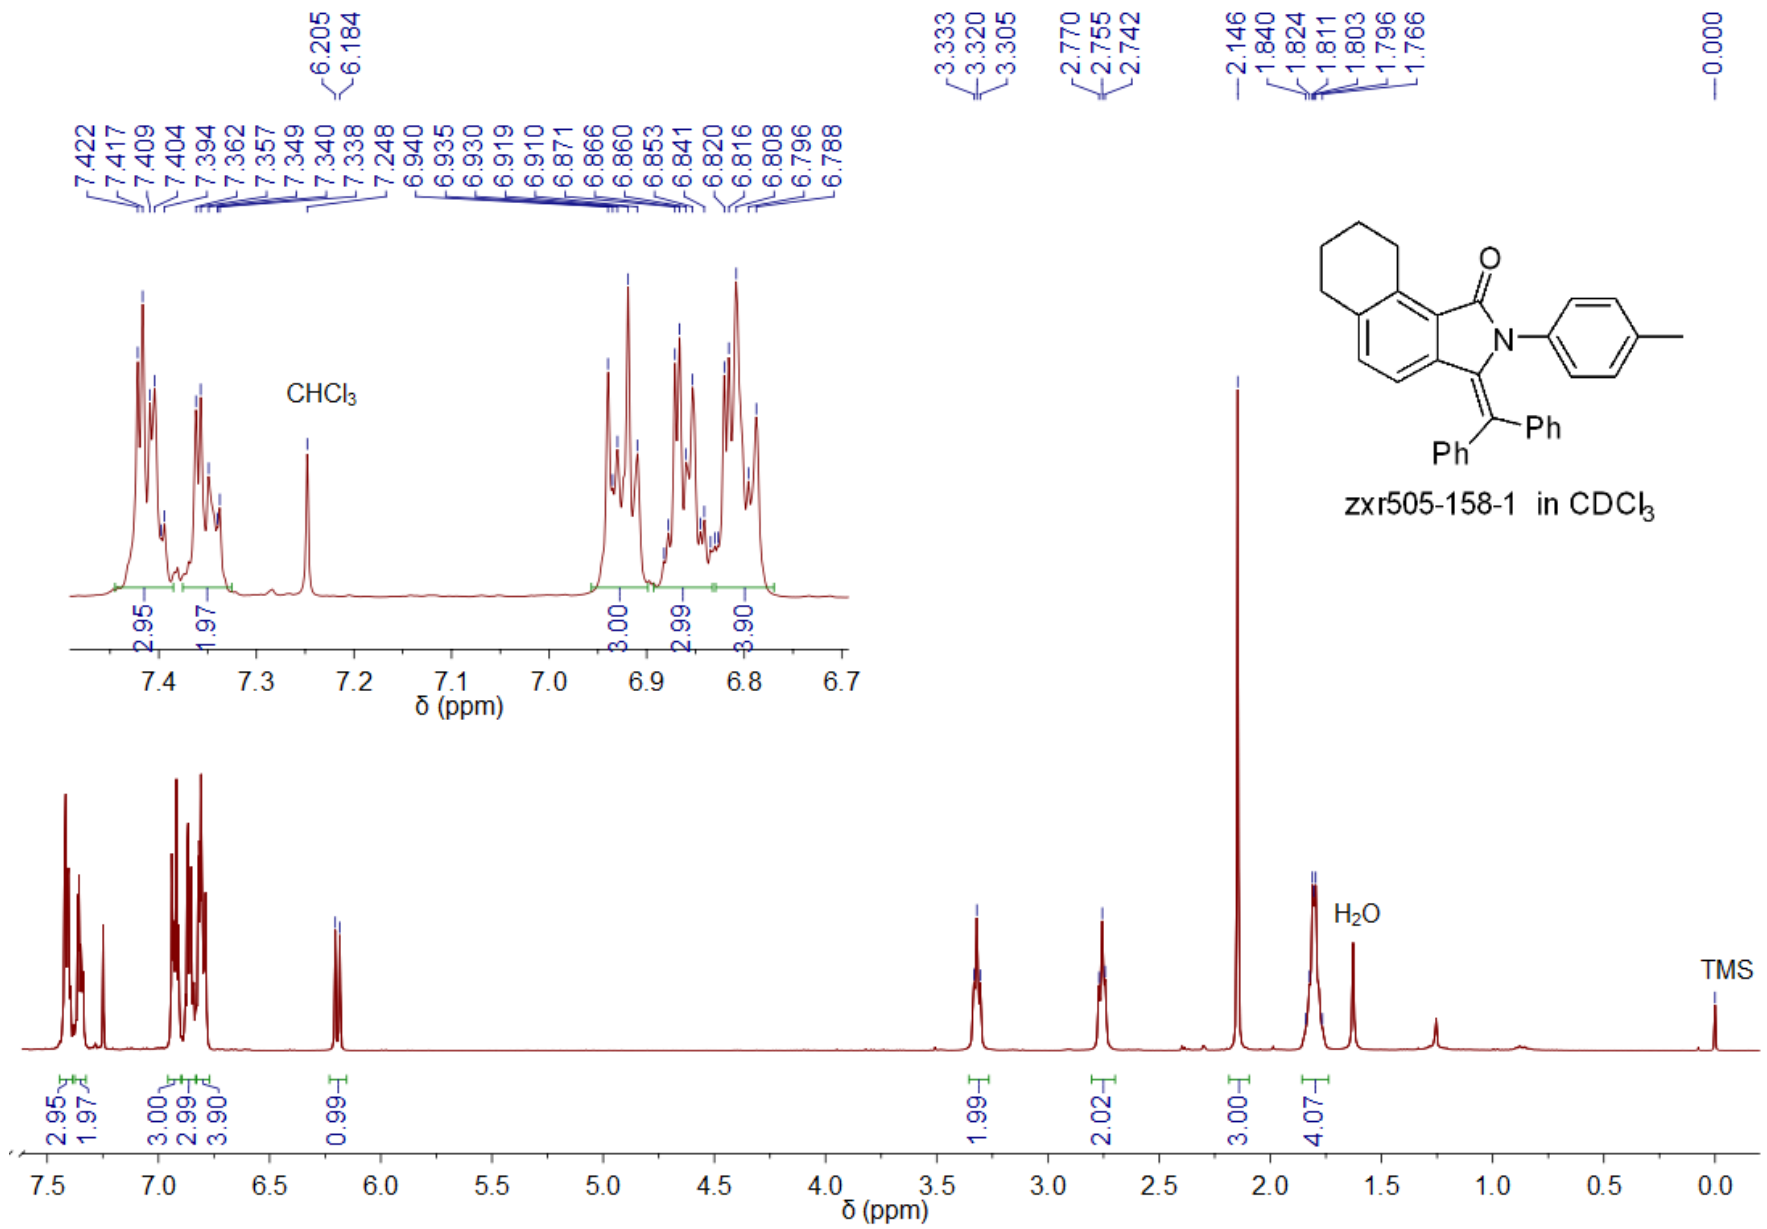

**4p** - <sup>1</sup>H NMR

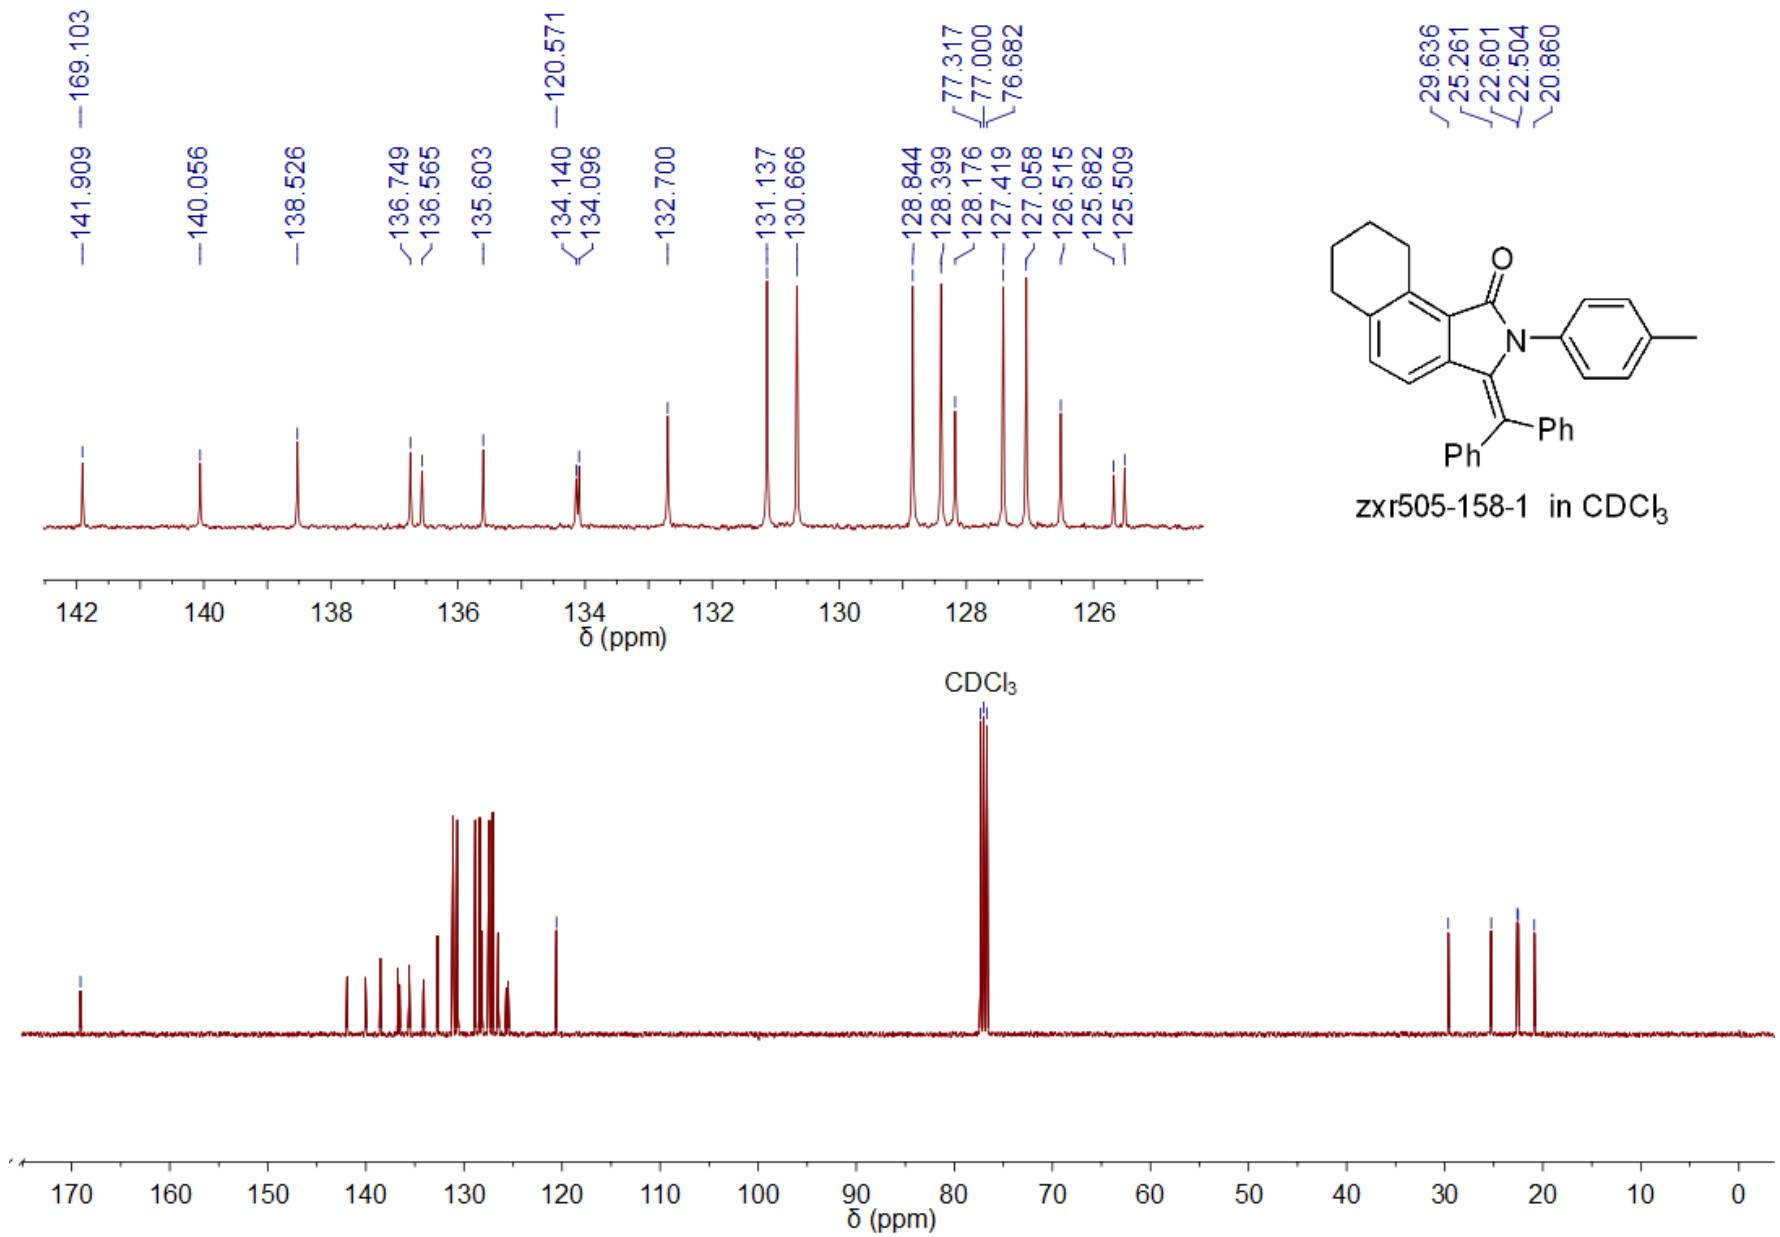

**4p** – <sup>13</sup>C NMR

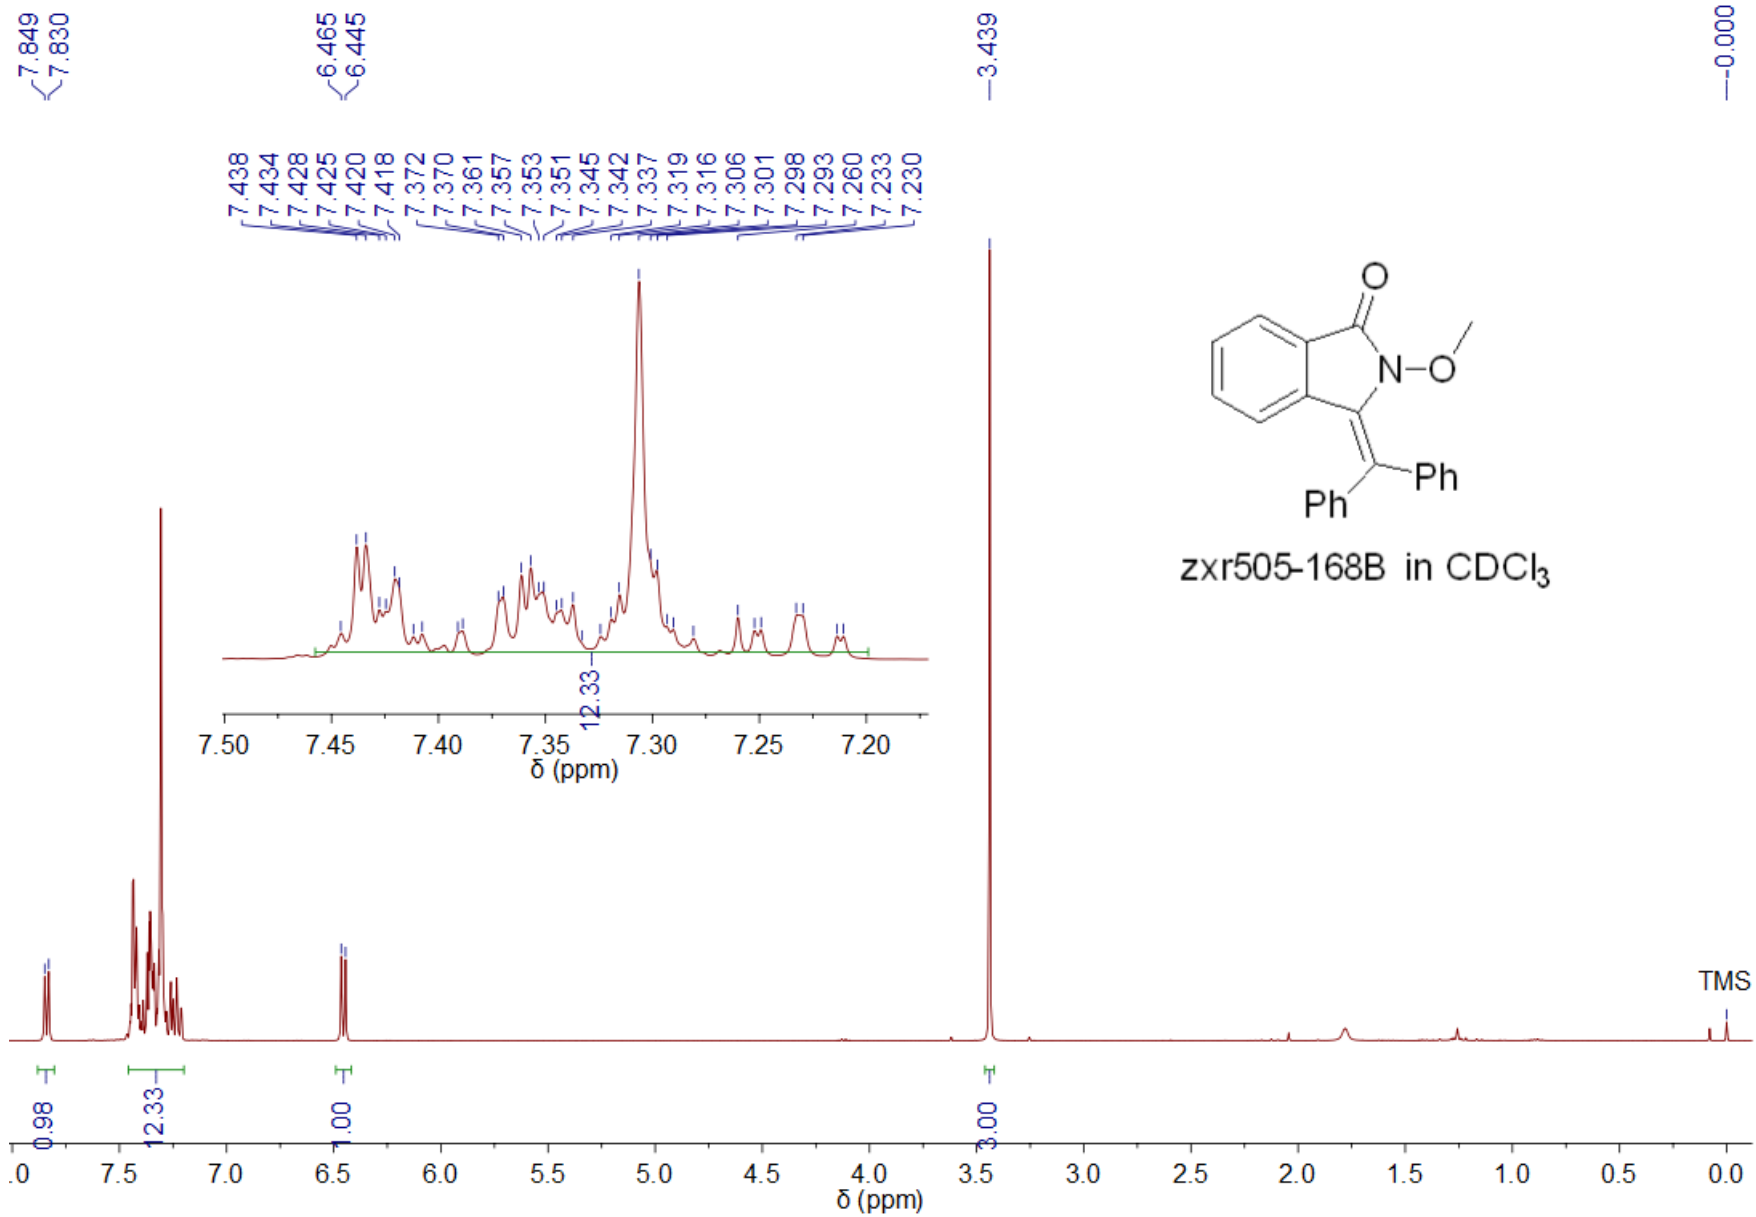

5a - <sup>1</sup>H NMR

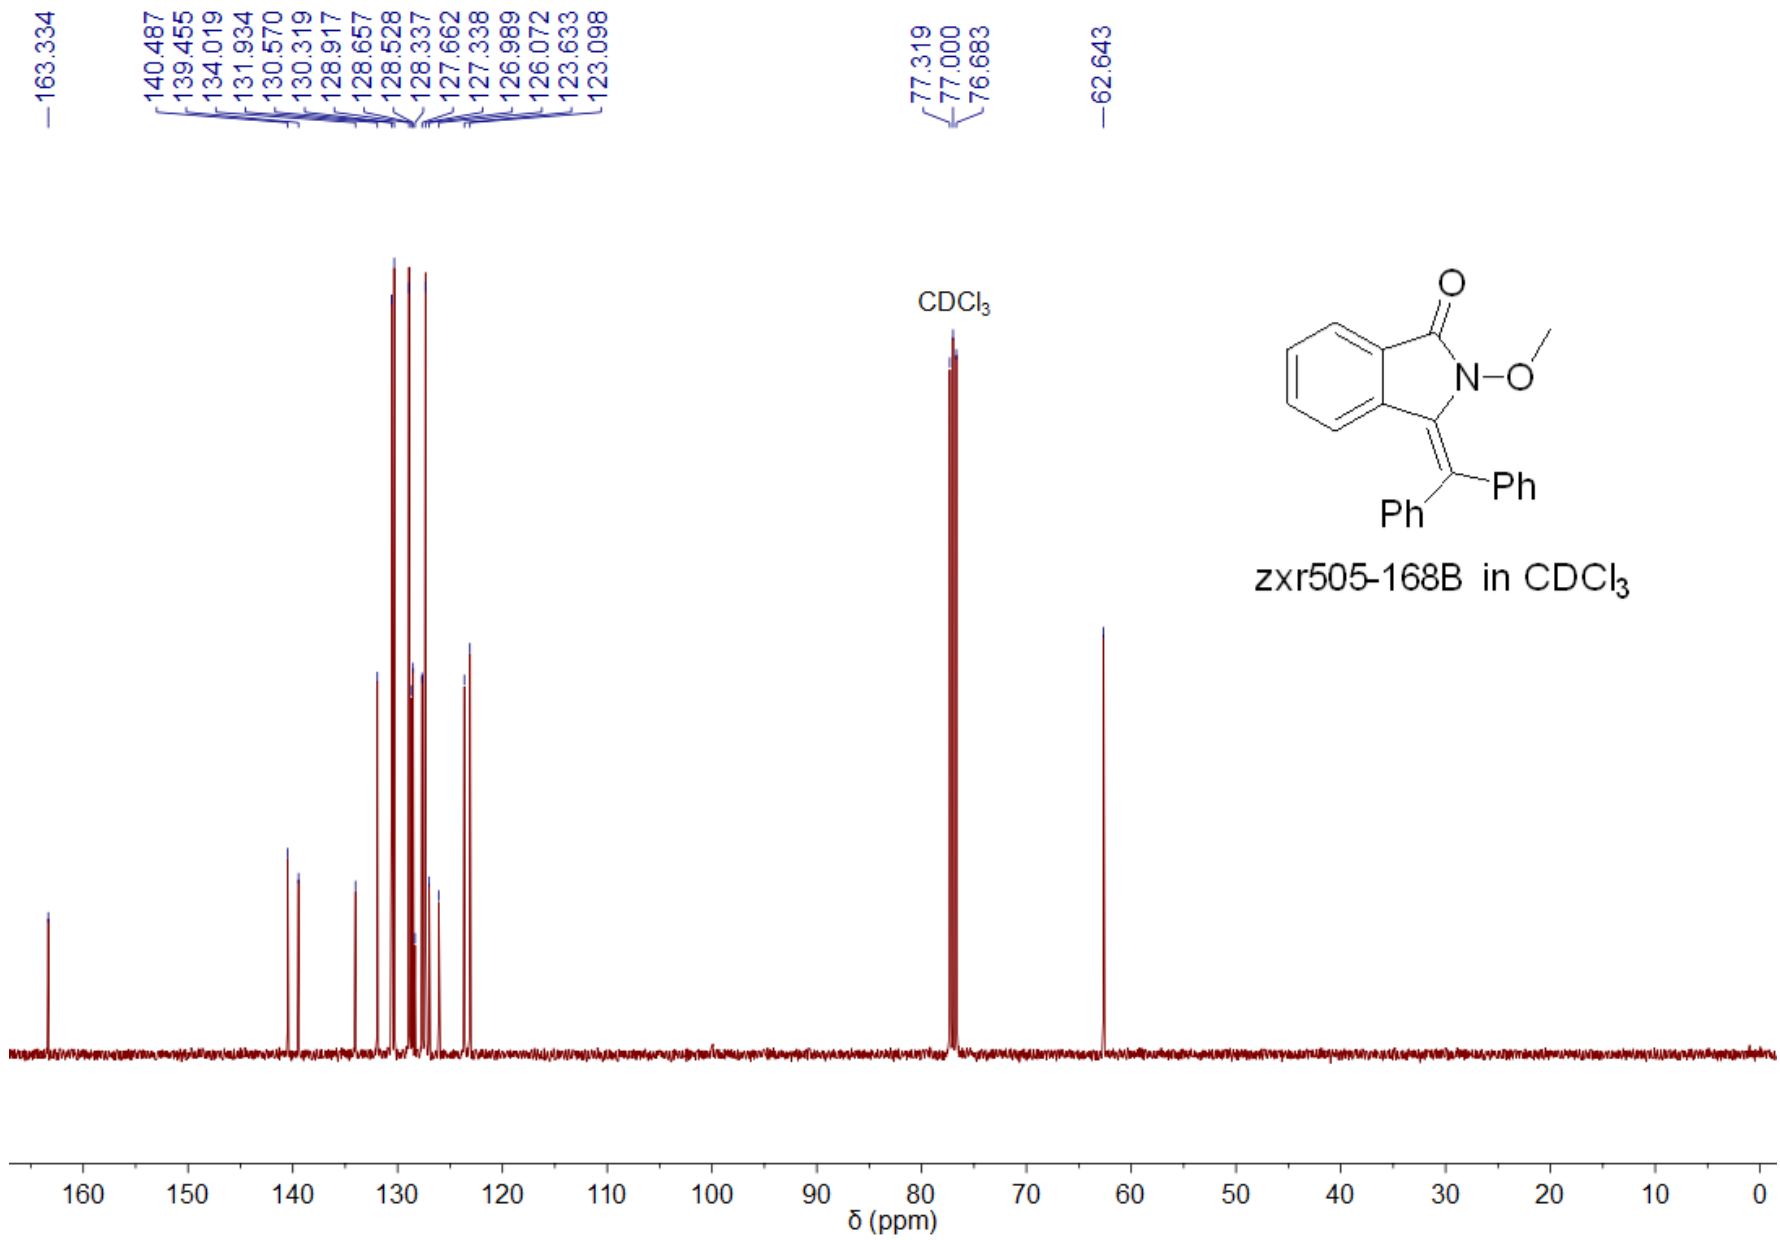

5a – <sup>13</sup>C NMR



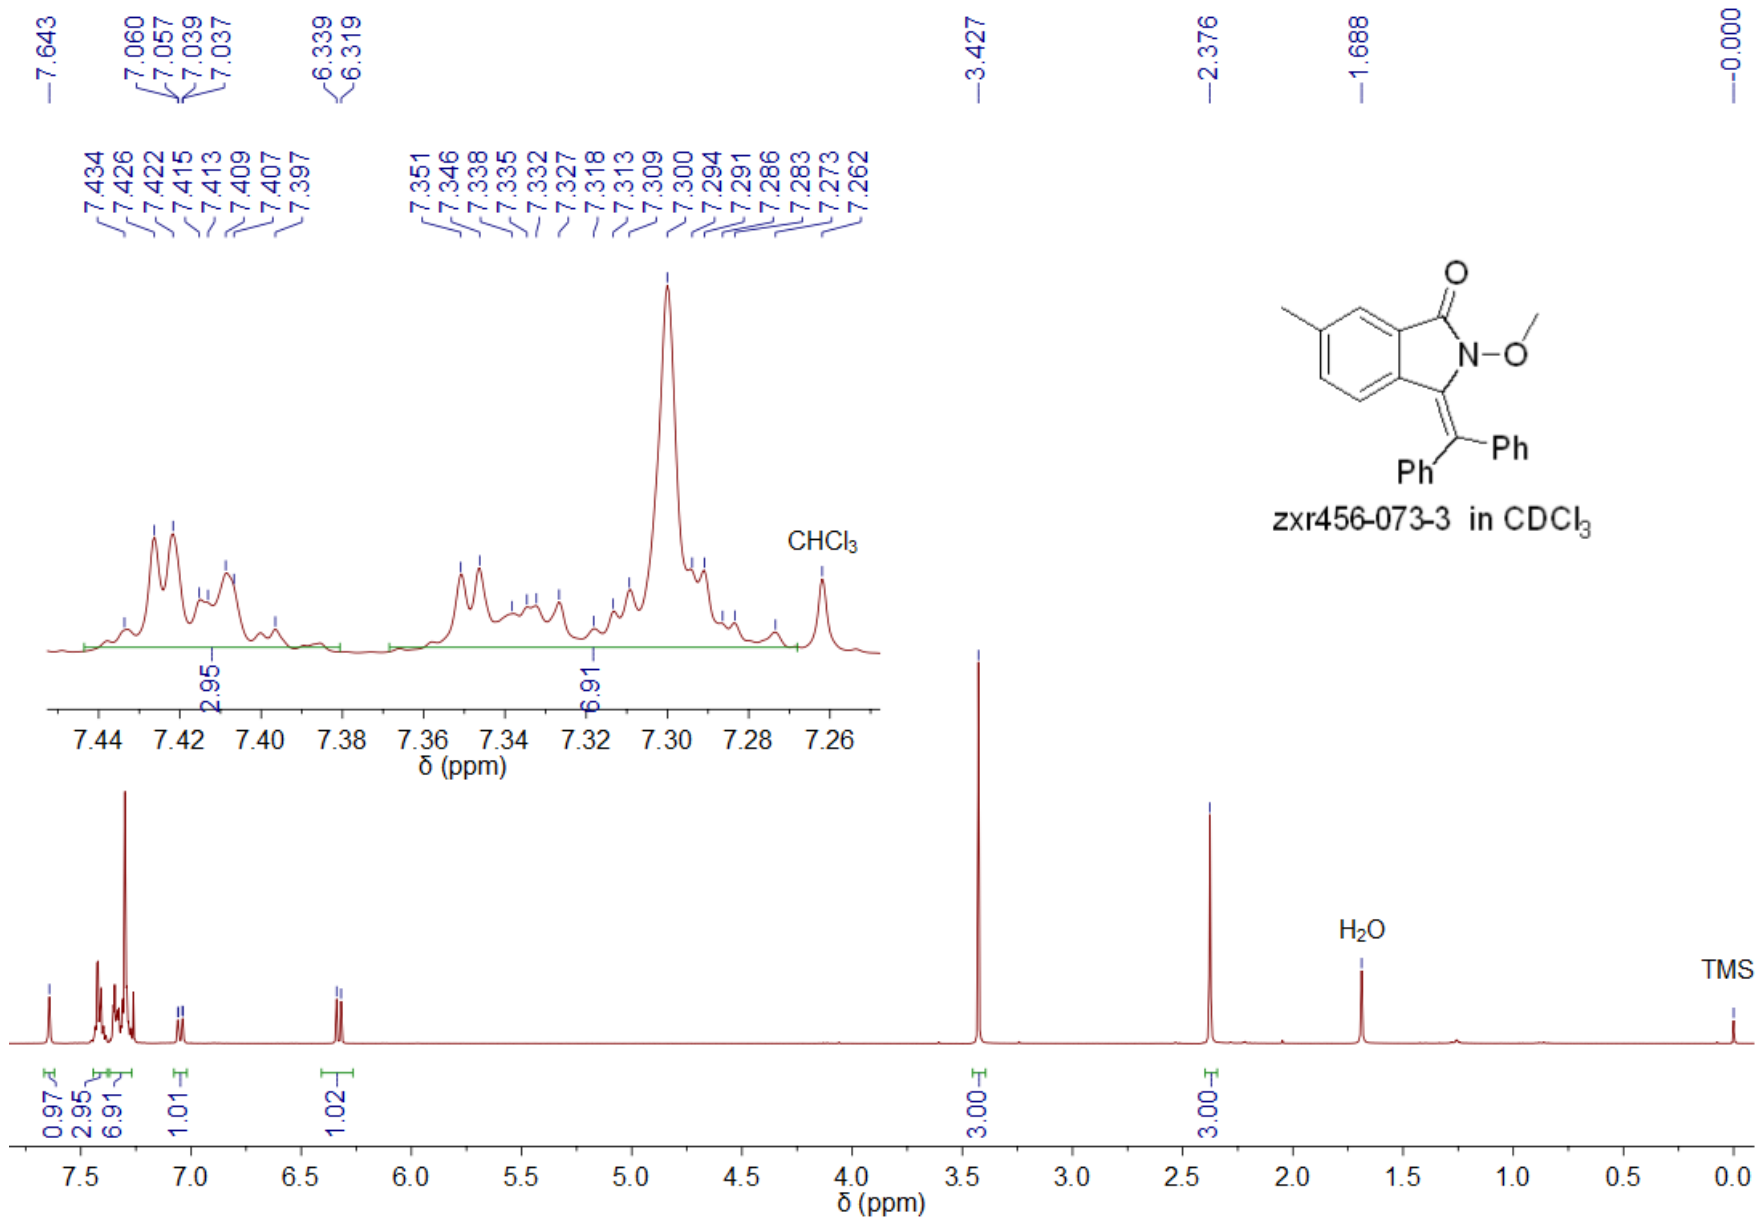

**5b** - <sup>1</sup>H NMR

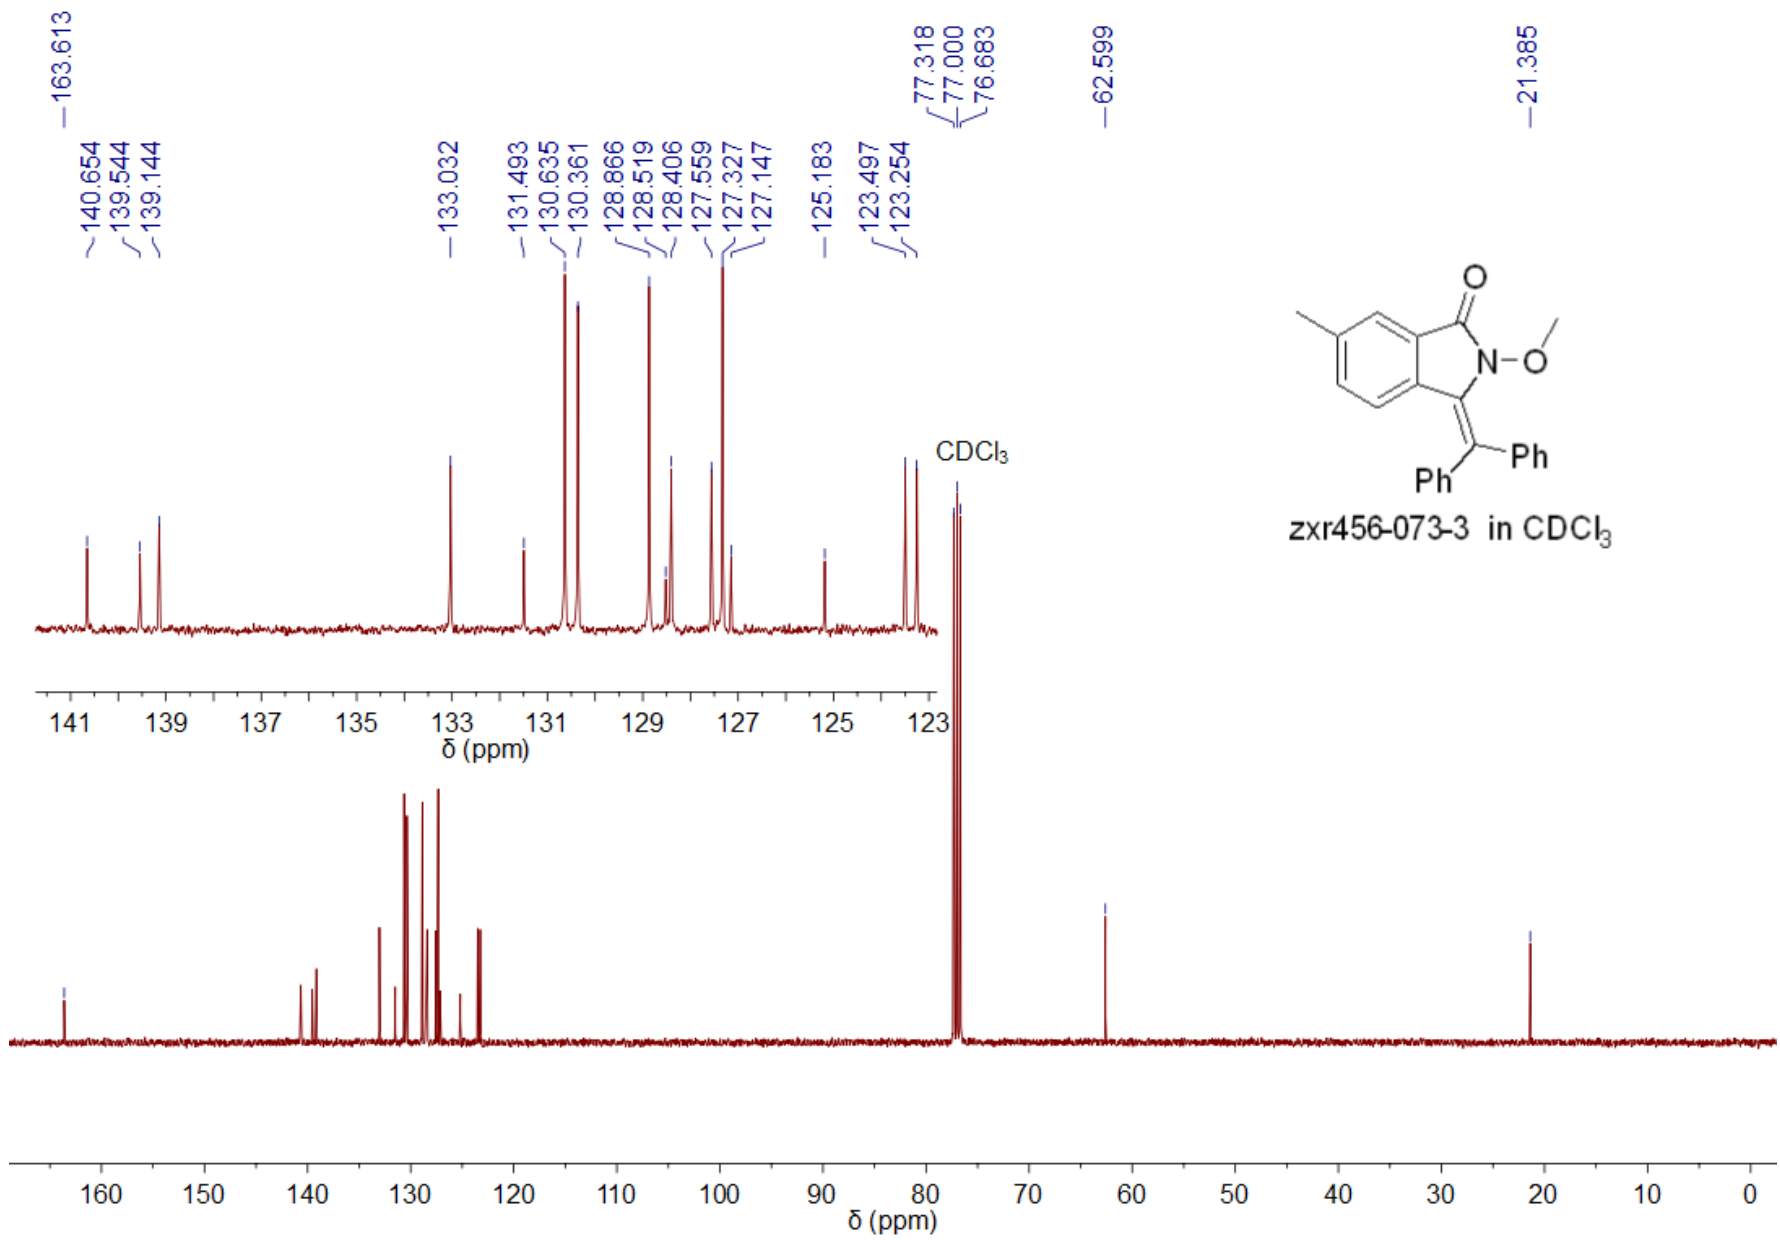

**5b** - <sup>13</sup>C NMR

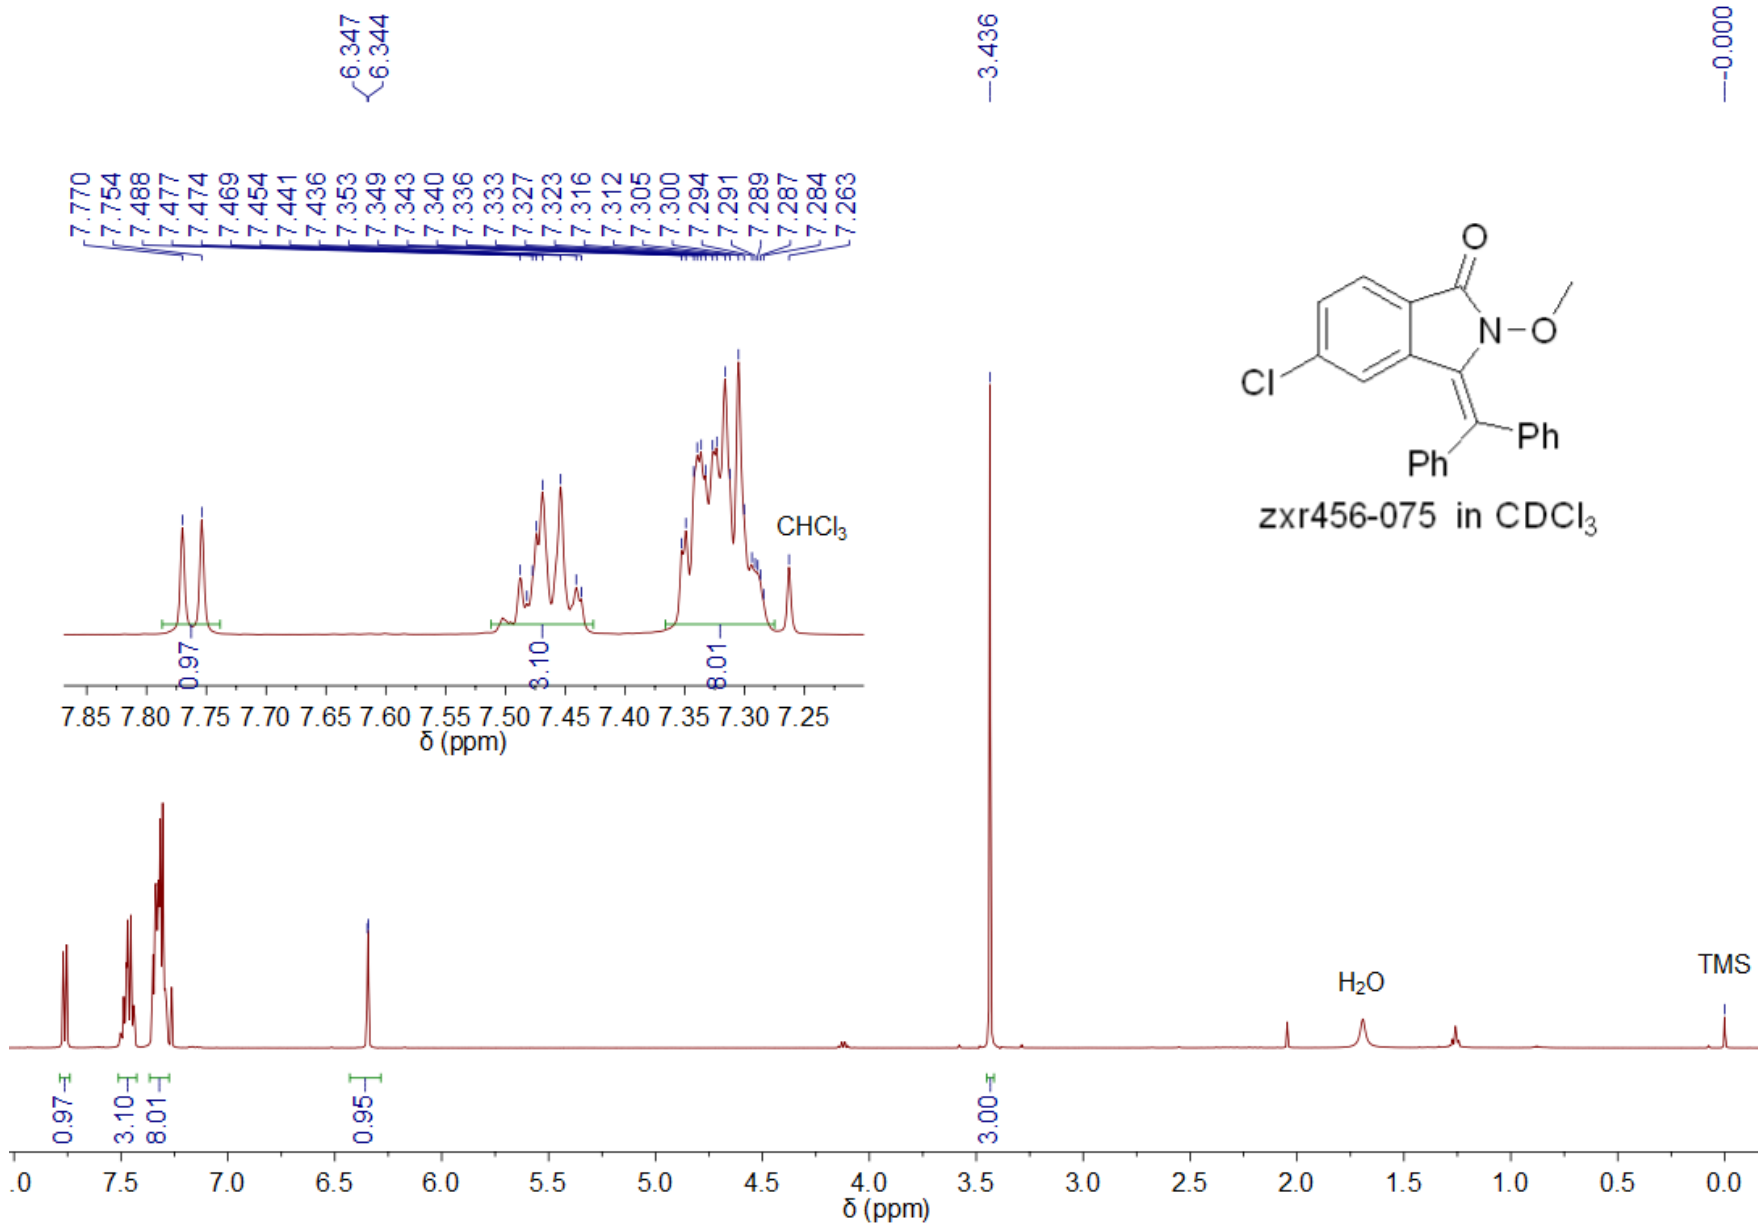

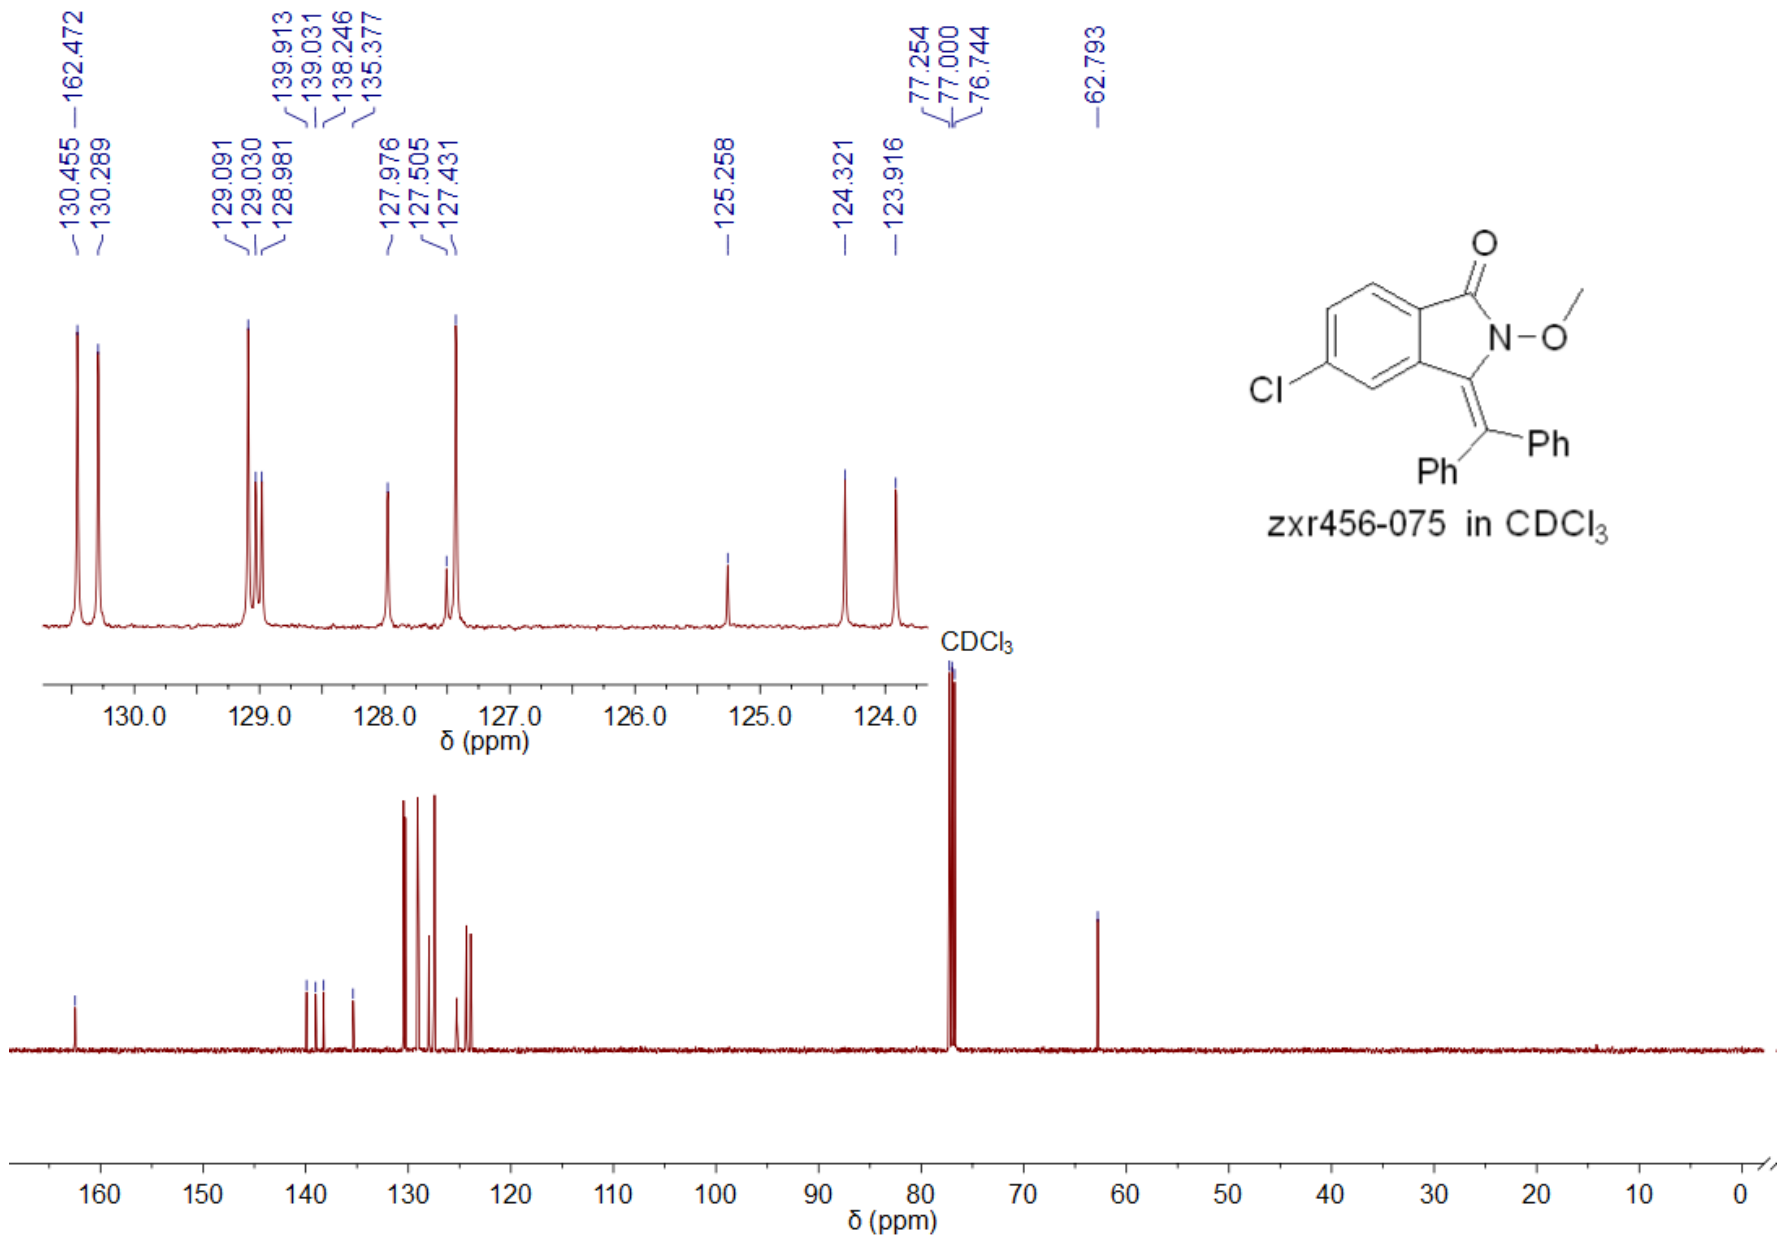

**5c** - <sup>13</sup>C NMR

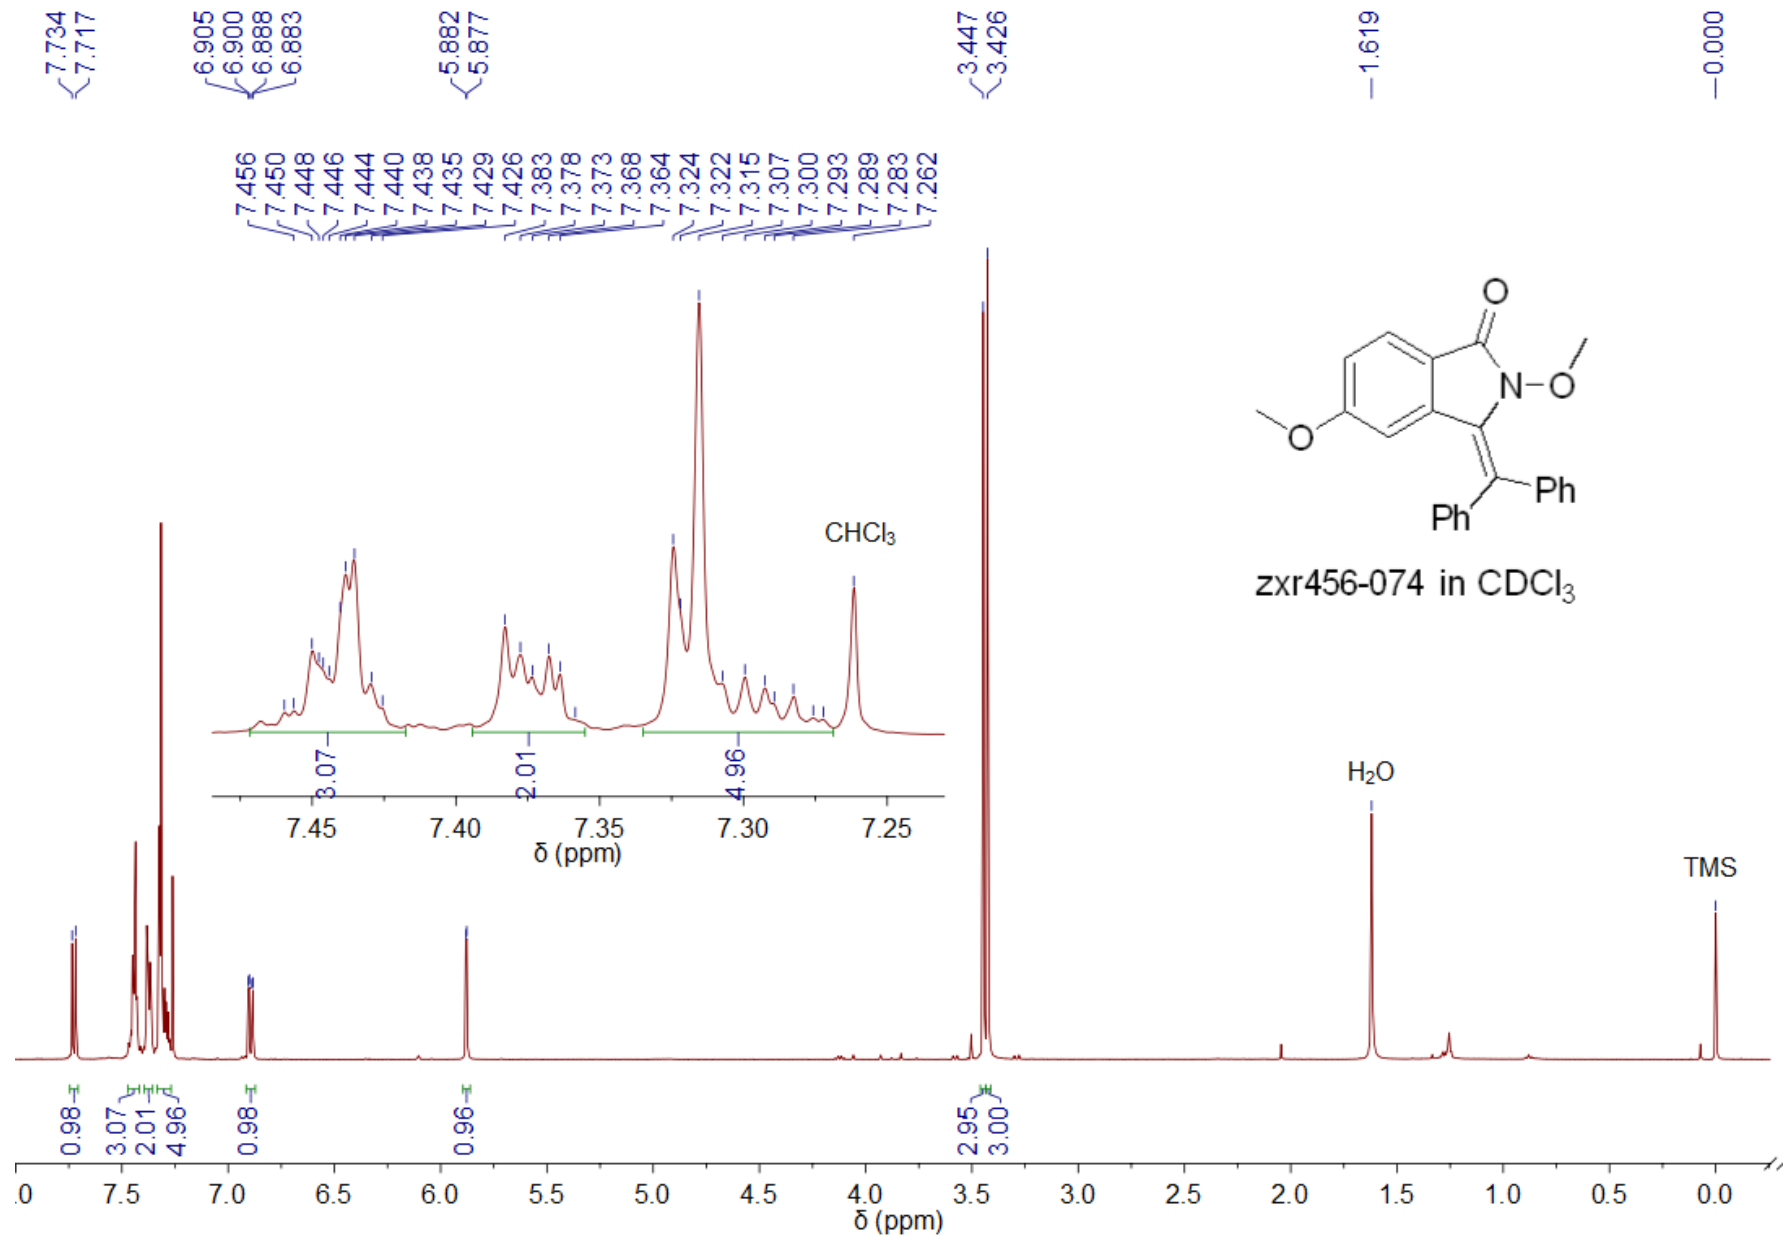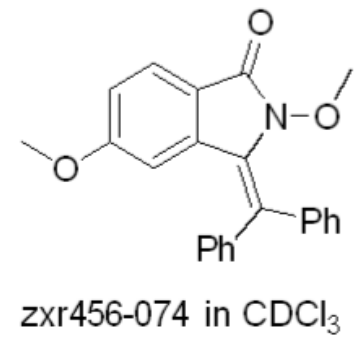

5d - <sup>1</sup>H NMR

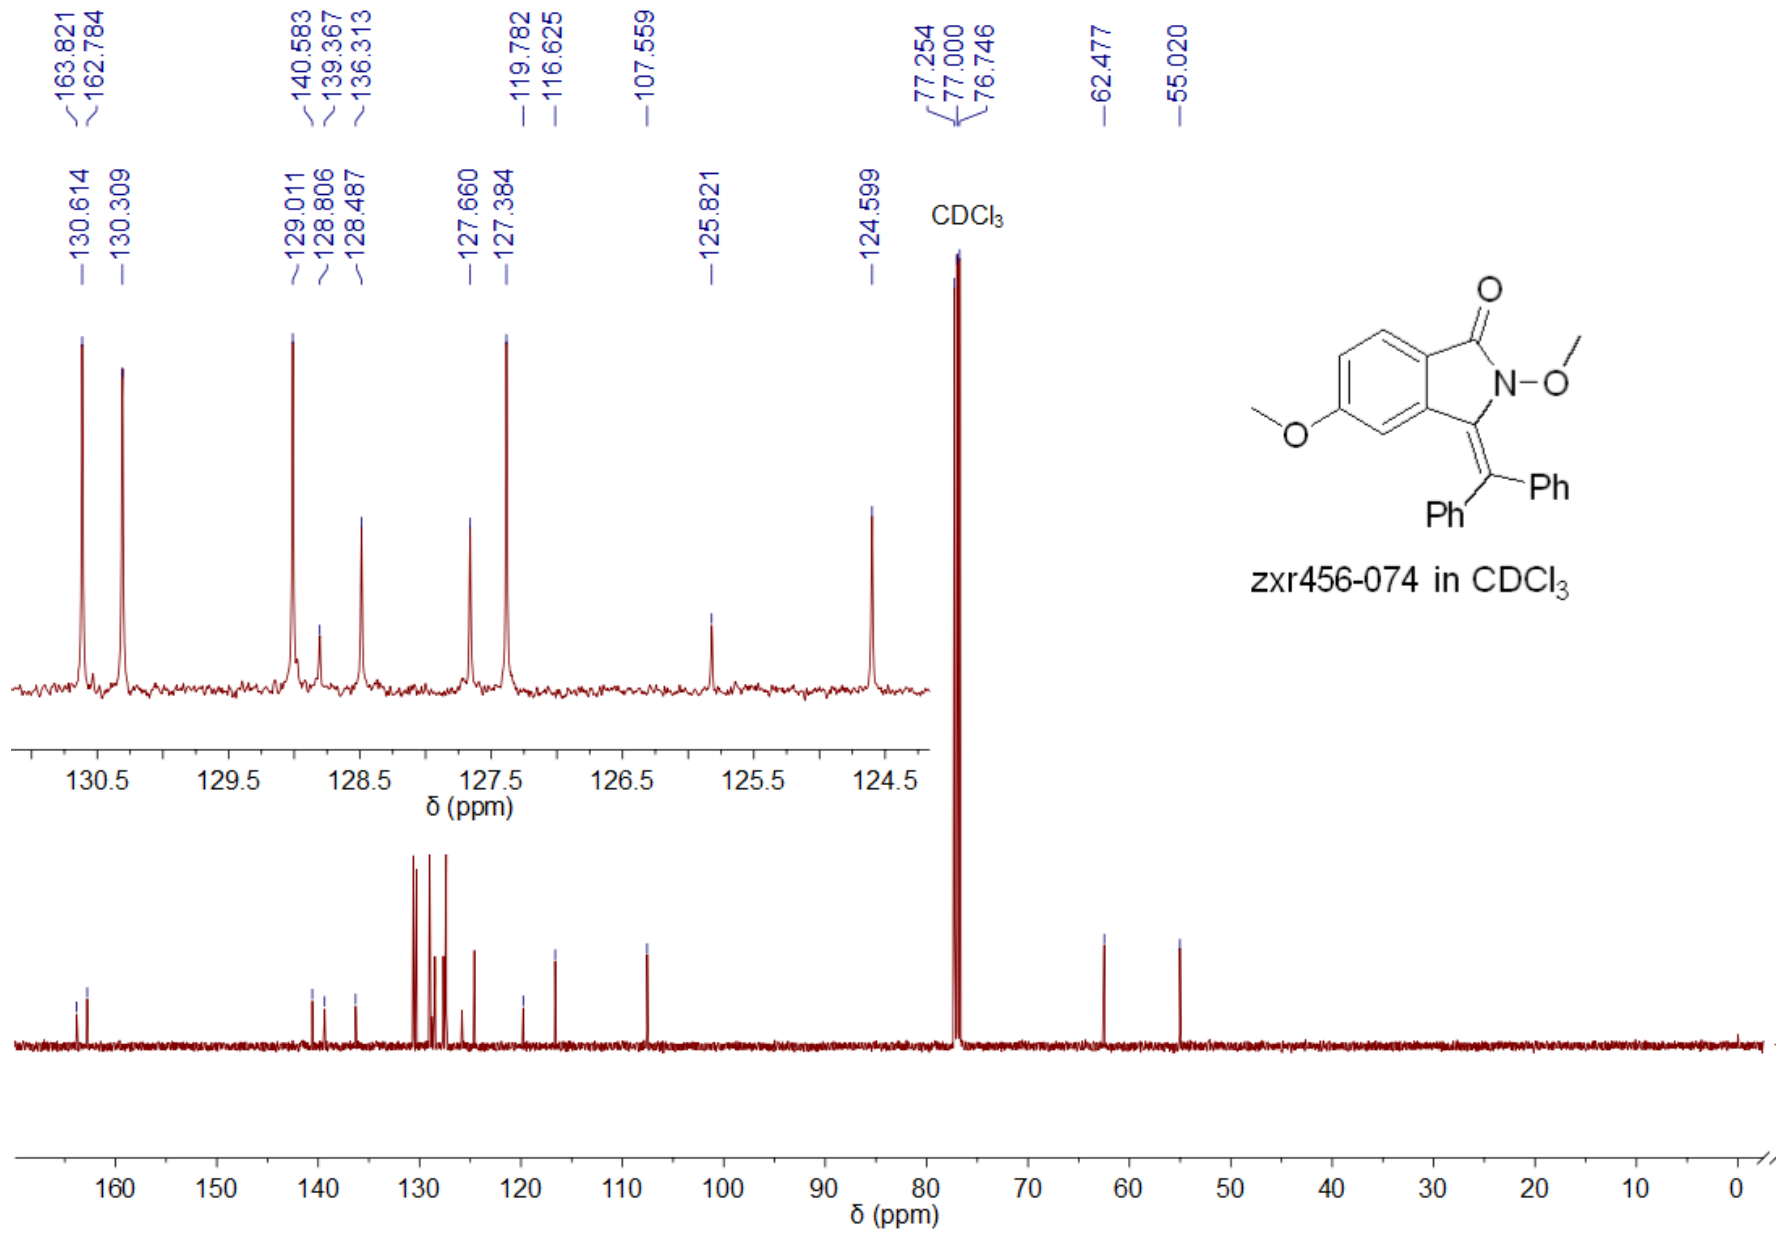

**5d** – <sup>13</sup>C NMR

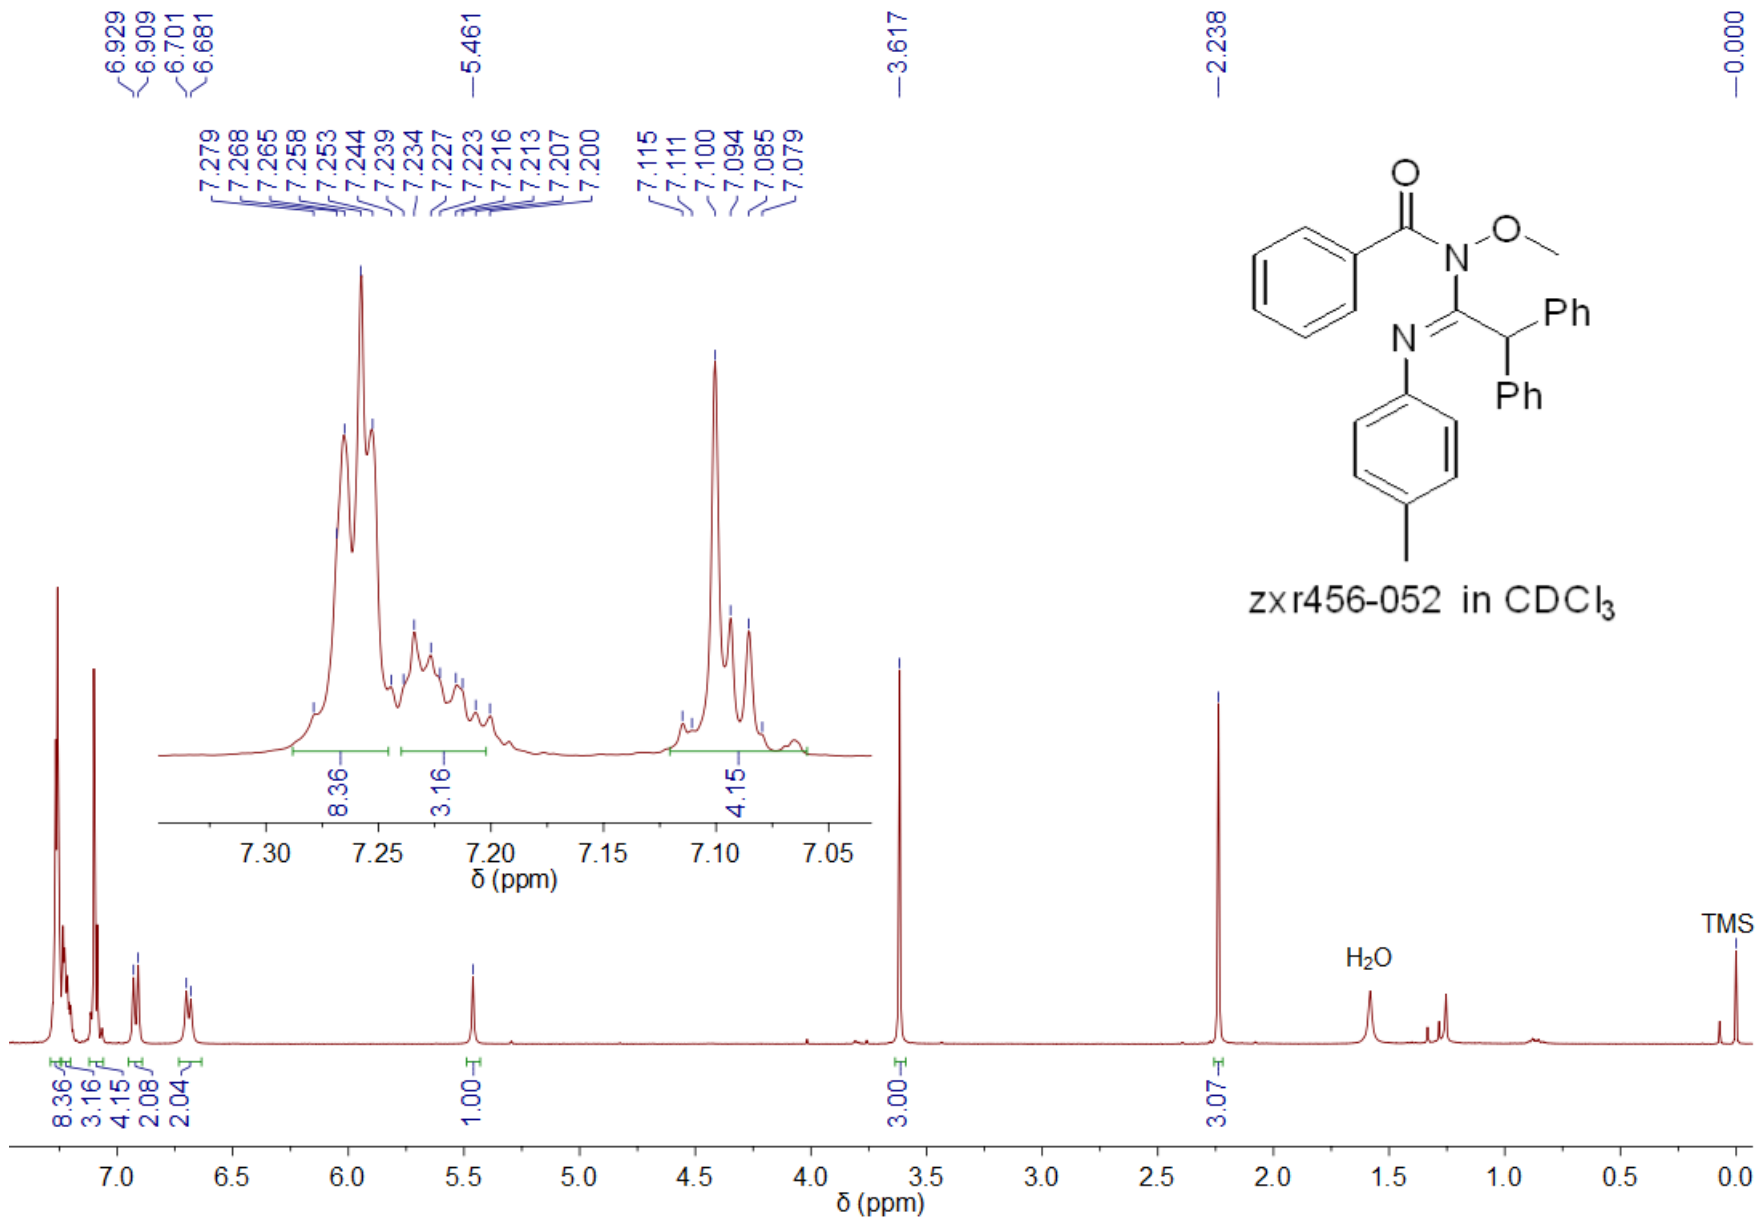

**6** -  $^1\text{H NMR}$

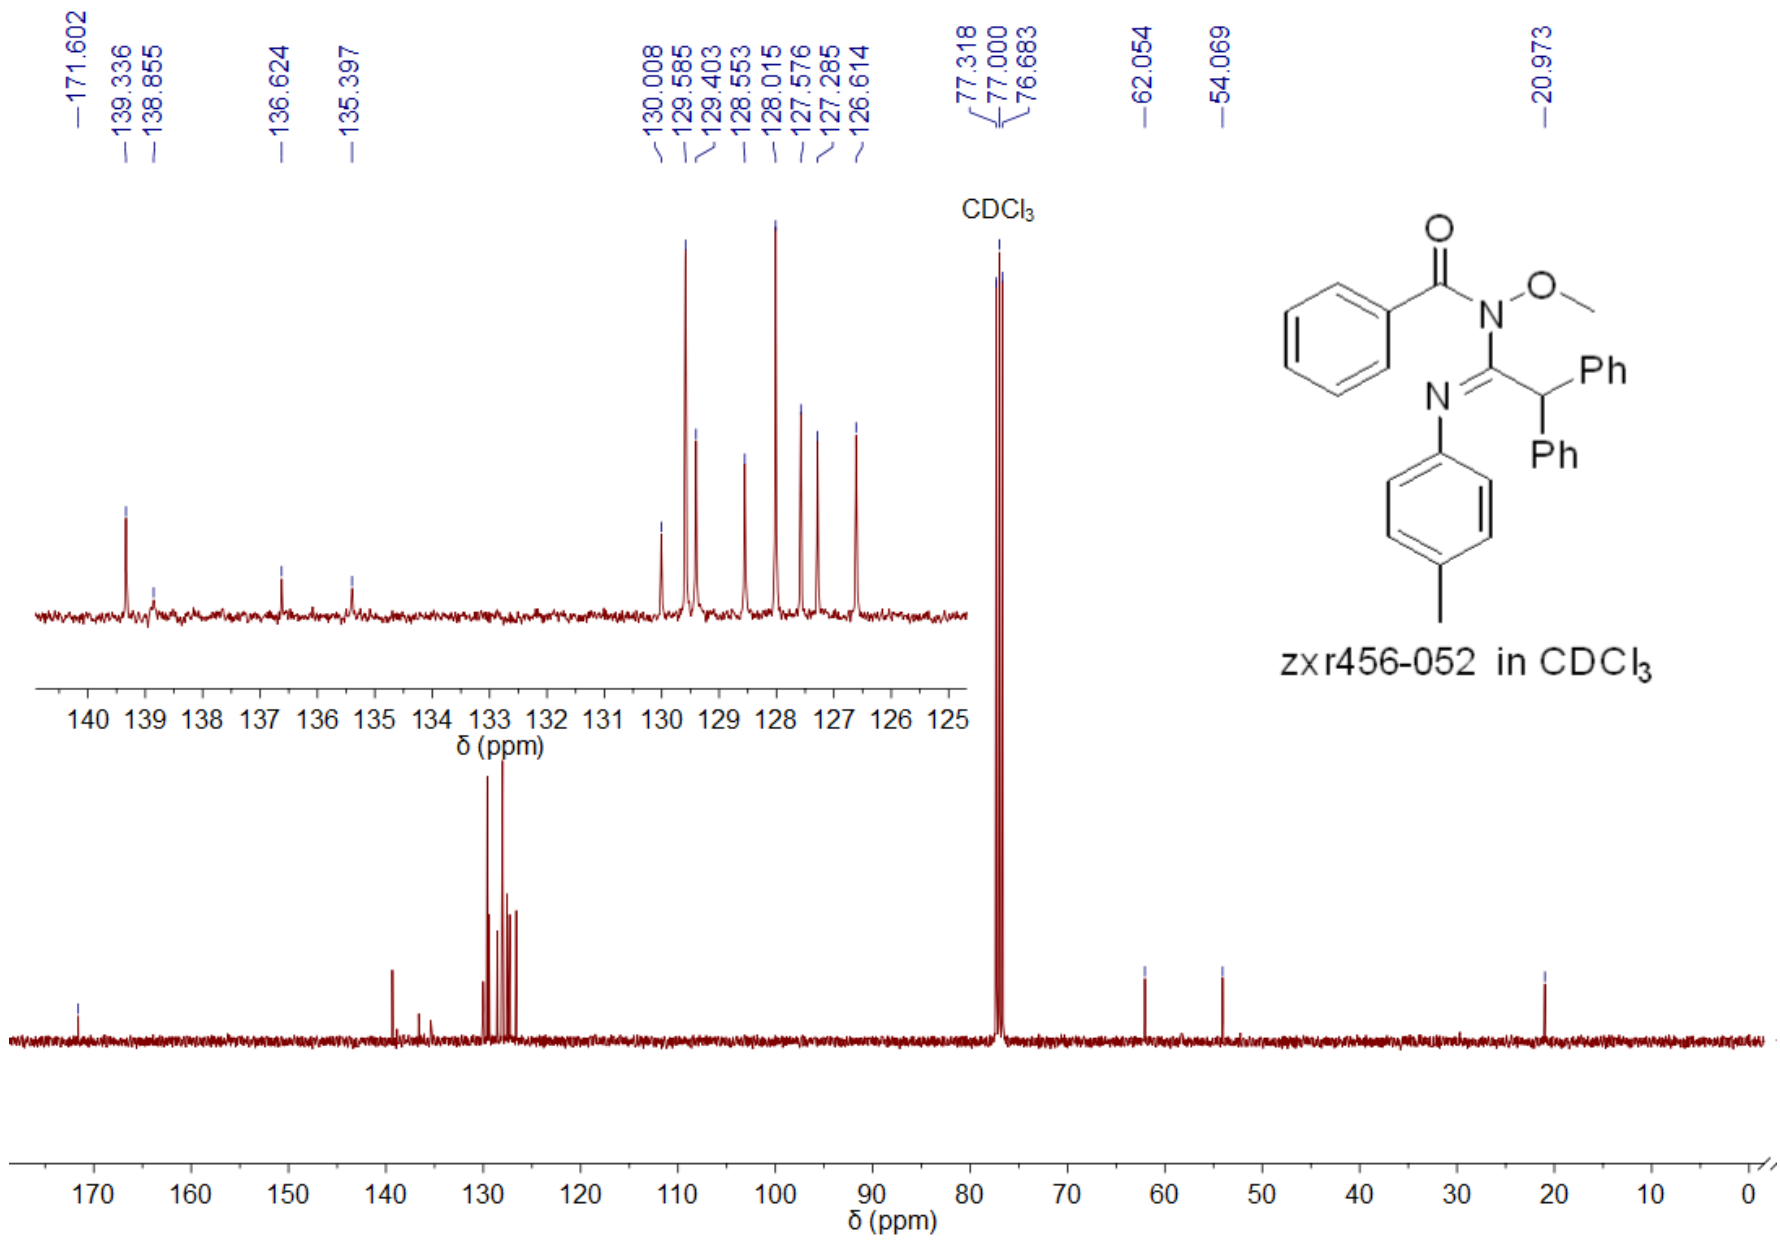

6 -  $^{13}\text{C}$  NMR
